# Supplementary material for: A human Staufen1 BAC transgenic mouse exhibits abnormal autophagy and neurodegeneration across the central nervous system
Source: Research Square preprint supplement (doi:10.21203/rs.3.rs-7411941/v1), 2025-09-23
Supplement: Supplementary file 1 [file 246f3f8563f672687bb8bf8a.xlsx]

## Sheet: BAC-STAU1-Primers
Supplemental Table 1: BAC-STAU1 genotyping primers. Will not amplifiy mouse Stau1.
Name	Sequence
1-F58691	5'-ACATGCTAAATGGAGCTATTTTCA-3'
1-R59200	5'-CTTTTGCTTTTTGAAGGTAAATGTG-3'
2-F106861	5'-TTATCATTCCCTGATTCCCTGCGC-3'
2-R107460	5'-TACCTCCTACCCTTCCATCACTGC-3'
3-F109091	5'-TACCAGAGTTGAAGAAGTTGCCAC-3'
3-R109430	5'-AGGCAAAAGGGCCAGAAAGTAACTC-3'
4-F5221	5'-GAGCAGGAACCATGGCTGACTTC-3'
4-R5830	5'-GATGGCGTCACACGAAACCAACC-3'
