# Supplementary material for: A human Staufen1 BAC transgenic mouse exhibits abnormal autophagy and neurodegeneration across the central nervous system
Source: Research Square preprint supplement (doi:10.21203/rs.3.rs-7411941/v1), 2025-09-23
Supplement: Supplementary file 2 [file 5f39a62b49f3bd588dd91e36.xlsx]

## Sheet: Suppl. Table 2
Supplemental Table 2 - all RNA-seq and pathway data

## Sheet: summary
contrast	summary	count	percent
TG vs WT 18590R	up-regulated	22	0.1
TG vs WT 18590R	down-regulated	8	0.04
TG vs WT 18590R	outliers	0	0
TG vs WT 18590R	low counts < 0.1	0	0
TG vs WT 23856R	up-regulated	31	0.14
TG vs WT 23856R	down-regulated	13	0.06
TG vs WT 23856R	outliers	0	0
TG vs WT 23856R	low counts < 2.1	0	0
18590R is the 25 wk age group
23856R is the 57 wk age group

## Sheet: TG_vs_WT_18590R_25 wks
id	gene_name	biotype	chromosome	description	human_homolog	baseMean	MLE_log2FC	log2FoldChange	lfcSE	stat	pvalue	padj
ENSMUSG00000001415	Smg5	protein_coding	3	Smg-5 homolog, nonsense mediated mRNA decay factor (C. elegans)	SMG5	2390.33	0.605003	0.517218	0.0520476	9.93528	2.92366e-23	6.3841e-19
ENSMUSG00000003038	Hmgn2	protein_coding	4	high mobility group nucleosomal binding domain 2	HMGN2	558.863	0.777361	0.514459	0.0692251	7.55573	4.16523e-14	4.5476e-10
ENSMUSG00000044349	Snhg11	protein_coding	2	small nucleolar RNA host gene 11	SNHG11	7163.04	-0.400622	-0.33986	0.0529769	-6.41725	1.38759e-10	1.00998e-06
ENSMUSG00000037348	Paqr7	protein_coding	4	progestin and adipoQ receptor family member VII	PAQR7	1786.36	0.397885	0.336494	0.053396	6.30055	2.96587e-10	1.61907e-06
ENSMUSG00000034245	Hdac11	protein_coding	6	histone deacetylase 11	HDAC11	5226.74	0.338756	0.295107	0.0496141	5.94417	2.77868e-09	1.2135e-05
ENSMUSG00000028832	Stmn1	protein_coding	4	stathmin 1	STMN1	2992.54	0.323744	0.284308	0.0482993	5.88756	3.91948e-09	1.42643e-05
ENSMUSG00000044788	Fads6	protein_coding	11	fatty acid desaturase domain family, member 6	FADS6	1752.48	0.382226	0.319602	0.0547304	5.83786	5.28753e-09	1.64941e-05
ENSMUSG00000027951	Adar	protein_coding	3	adenosine deaminase, RNA-specific	ADAR	3113.37	0.305333	0.268725	0.048004	5.5982	2.16584e-08	5.25481e-05
ENSMUSG00000110331	Nudc-ps1	processed_pseudogene	8	nuclear distribution gene C homolog (Aspergillus), pseudogene 1		69.2411	-1.61542	-0.299391	0.0617226	-5.61715	1.94136e-08	5.25481e-05
ENSMUSG00000069020	Urm1	protein_coding	2	ubiquitin related modifier 1	URM1	934.034	0.414643	0.329878	0.0595859	5.53613	3.09227e-08	6.75227e-05
ENSMUSG00000046480	Scn4b	protein_coding	9	sodium channel, type IV, beta	SCN4B	7381.43	0.273755	0.243359	0.046439	5.24046	1.60179e-07	0.00031797
ENSMUSG00000031503	Col4a2	protein_coding	8	collagen, type IV, alpha 2	COL4A2	564.619	-0.472095	-0.339127	0.066411	-5.10807	3.25463e-07	0.000592233
ENSMUSG00000117465	Gm49980	lincRNA	18	predicted gene, 49980		104.592	-1.0344	-0.355989	0.0706314	-5.09084	3.56477e-07	0.000598771
ENSMUSG00000028927	Padi2	protein_coding	4	peptidyl arginine deiminase, type II	PADI2	2169.75	0.426936	0.322688	0.0640627	4.9931	5.94175e-07	0.000926743
ENSMUSG00000042613	Pbxip1	protein_coding	3	pre B cell leukemia transcription factor interacting protein 1	PBXIP1	1768.19	0.300559	0.253583	0.0536436	4.72819	2.26528e-06	0.00329764
ENSMUSG00000084803	5830444B04Rik	processed_transcript	4	RIKEN cDNA 5830444B04 gene		18.0531	2.9236	0.157469	0.0369668	4.69167	2.70984e-06	0.00369826
ENSMUSG00000058174	Gm5148	protein_coding	3	predicted gene 5148		48.6458	3.00387	0.101808	0.0336352	4.62529	3.74077e-06	0.00480491
ENSMUSG00000037151	Lrrc20	protein_coding	10	leucine rich repeat containing 20	LRRC20	430.495	0.425263	0.305654	0.0664678	4.59473	4.33318e-06	0.00525663
ENSMUSG00000034853	Acot11	protein_coding	4	acyl-CoA thioesterase 11	ACOT11	2354.85	0.338435	0.268868	0.0593594	4.54872	5.3972e-06	0.00620281
ENSMUSG00000061815	Rufy4	protein_coding	1	RUN and FYVE domain containing 4	RUFY4	47.2118	-4.68609	-0.0648192	0.0224321	-4.53781	5.68405e-06	0.00620585
ENSMUSG00000010122	Slc47a1	protein_coding	11	solute carrier family 47, member 1	SLC47A1,SLC47A2	15.8099	-3.71372	-0.140493	0.0332227	-4.52135	6.14477e-06	0.00637344
ENSMUSG00000028917	Plekhm2	protein_coding	4	pleckstrin homology domain containing, family M (with RUN domain) member 2	PLEKHM2	2273.4	0.269956	0.231943	0.0514025	4.51202	6.4213e-06	0.00637344
ENSMUSG00000074892	B3galt5	protein_coding	16	UDP-Gal:betaGlcNAc beta 1,3-galactosyltransferase, polypeptide 5	B3GALT5	4060.34	0.218905	0.19547	0.0456	4.28925	1.79277e-05	0.0170204
ENSMUSG00000089417	Gm22009	scaRNA	3	predicted gene, 22009		1758.37	0.295446	0.241815	0.0569654	4.24504	2.18555e-05	0.0198849
ENSMUSG00000102742	Pcdhga11	protein_coding	18	protocadherin gamma subfamily A, 11	PCDHGA11	167.667	0.73835	0.30335	0.0729189	4.22002	2.44279e-05	0.0213363
ENSMUSG00000007021	Syngr3	protein_coding	17	synaptogyrin 3	SYNGR3	1495.5	0.283974	0.234648	0.0560059	4.18929	2.79831e-05	0.0235015
ENSMUSG00000118145	Gm6724	processed_pseudogene	18	predicted gene 6724		11.1075	-2.8357	-0.138827	0.0370126	-4.16124	3.16524e-05	0.0255986
ENSMUSG00000029001	Fbxo44	protein_coding	4	F-box protein 44	FBXO44	1877.32	0.286898	0.232937	0.0573092	4.08306	4.44458e-05	0.0334661
ENSMUSG00000114442	F630042J09Rik	lincRNA	13	RIKEN cDNA F630042J09 gene		31.2313	-1.75555	-0.177774	0.0469238	-4.08357	4.43497e-05	0.0334661
ENSMUSG00000032333	Stoml1	protein_coding	9	stomatin-like 1	STOML1	977.362	0.275917	0.226868	0.0564975	4.01577	5.92525e-05	0.0431279
ENSMUSG00000018820	Zfyve27	protein_coding	19	zinc finger, FYVE domain containing 27	ZFYVE27	1426.17	0.24975	0.210526	0.0537702	3.9156	9.01795e-05	0.0635213
ENSMUSG00000030352	Tspan9	protein_coding	6	tetraspanin 9	TSPAN9	1772.56	0.285716	0.228656	0.0590038	3.87911	0.00010484	0.0715401
ENSMUSG00000027714	Exosc9	protein_coding	3	exosome component 9	EXOSC9	420.601	0.454392	0.279641	0.0721245	3.83523	0.000125448	0.0830084
ENSMUSG00000040940	Arhgef1	protein_coding	7	Rho guanine nucleotide exchange factor (GEF) 1	ARHGEF1	498.068	-0.352917	-0.2513	0.0668717	-3.7595	0.000170251	0.109341
ENSMUSG00000045102	Poln	protein_coding	5	DNA polymerase N	POLN	45.3452	-1.01176	-0.231034	0.0626038	-3.71017	0.000207119	0.129219
ENSMUSG00000001518	Itfg2	protein_coding	6	integrin alpha FG-GAP repeat containing 2	ITFG2	443.302	0.337923	0.244502	0.0661213	3.69574	0.000219245	0.132212
ENSMUSG00000042116	Vwa1	protein_coding	4	von Willebrand factor A domain containing 1	VWA1	955.168	0.291135	0.226323	0.0613959	3.69026	0.000224026	0.132212
ENSMUSG00000024978	Gpam	protein_coding	19	glycerol-3-phosphate acyltransferase, mitochondrial	GPAM	3037.93	0.187768	0.167592	0.045783	3.66045	0.000251774	0.144677
ENSMUSG00000037071	Scd1	protein_coding	19	stearoyl-Coenzyme A desaturase 1	SCD	8965.81	-0.251147	-0.207247	0.0565757	-3.64778	0.000264516	0.148102
ENSMUSG00000033009	Ogfod1	protein_coding	8	2-oxoglutarate and iron-dependent oxygenase domain containing 1	OGFOD1	2216.45	0.224223	0.191034	0.0524742	3.64105	0.000271529	0.148228
ENSMUSG00000028759	Hp1bp3	protein_coding	4	heterochromatin protein 1, binding protein 3	HP1BP3	3095.11	0.181827	0.162065	0.0460086	3.52249	0.000427514	0.226964
ENSMUSG00000028961	Pgd	protein_coding	4	phosphogluconate dehydrogenase	PGD	450.094	-0.428147	-0.258006	0.0725187	-3.51694	0.00043655	0.226964
ENSMUSG00000087881	Gm22442	scaRNA	11	predicted gene, 22442		661.725	0.301727	0.225804	0.0642391	3.50908	0.000449664	0.228346
ENSMUSG00000021510	Zfp729a	protein_coding	13	zinc finger protein 729a	ZNF729	615.727	-0.418094	-0.250797	0.0723386	-3.48042	0.000500622	0.248445
ENSMUSG00000001119	Col6a1	protein_coding	10	collagen, type VI, alpha 1	COL6A1	233.689	-0.590099	-0.253825	0.0732238	-3.4717	0.000517165	0.248642
ENSMUSG00000031785	Adgrg1	protein_coding	8	adhesion G protein-coupled receptor G1	ADGRG1	1142.68	0.247006	0.200291	0.0579264	3.45607	0.000548106	0.248642
ENSMUSG00000033327	Tnxb	protein_coding	17	tenascin XB	TNXB	175.056	-0.633834	-0.254767	0.0722668	-3.45127	0.000557954	0.248642
ENSMUSG00000034171	Faah	protein_coding	4	fatty acid amide hydrolase	FAAH	945.651	-0.3502	-0.240785	0.0688818	-3.46219	0.000535796	0.248642
ENSMUSG00000070639	Lrrc8b	protein_coding	5	leucine rich repeat containing 8 family, member B	LRRC8B	1328.43	-0.306067	-0.224155	0.0650939	-3.4638	0.000532611	0.248642
ENSMUSG00000096010	H4f16	protein_coding	6	H4 histone 16	H4-16	163.599	0.710417	0.232967	0.0701488	3.44248	0.000576409	0.251729
ENSMUSG00000029778	Adcyap1r1	protein_coding	6	adenylate cyclase activating polypeptide 1 receptor 1	ADCYAP1R1	4362.43	0.206908	0.176851	0.0518009	3.42173	0.00062225	0.266421
ENSMUSG00000030029	Lrig1	protein_coding	6	leucine-rich repeats and immunoglobulin-like domains 1	LRIG1	3498.55	0.201607	0.173841	0.0509197	3.41457	0.000638838	0.268263
ENSMUSG00000029434	Vps33a	protein_coding	5	VPS33A CORVET/HOPS core subunit	VPS33A	1483.92	0.226163	0.187873	0.0554423	3.38833	0.000703202	0.289719
ENSMUSG00000025743	Sdc3	protein_coding	4	syndecan 3	SDC3	3561.27	0.213475	0.180256	0.0535848	3.36391	0.000768478	0.292641
ENSMUSG00000027447	Cst3	protein_coding	2	cystatin C	CST3	12046.5	0.18751	0.164207	0.0488386	3.3606	0.000777733	0.292641
ENSMUSG00000037681	Esyt3	protein_coding	9	extended synaptotagmin-like protein 3	ESYT3	93.3566	-0.639854	-0.239351	0.0716982	-3.35138	0.000804105	0.292641
ENSMUSG00000051497	Kcnj16	protein_coding	11	potassium inwardly-rectifying channel, subfamily J, member 16	KCNJ16	1332.75	0.212303	0.179557	0.0533907	3.36296	0.00077111	0.292641
ENSMUSG00000056919	Cep162	protein_coding	9	centrosomal protein 162	CEP162	500.741	-0.314341	-0.223857	0.0667006	-3.369	0.000754414	0.292641
ENSMUSG00000058581	Gm5801	processed_pseudogene	14	predicted pseudogene 5801		20.9511	-1.38328	-0.152449	0.0488447	-3.3538	0.000797111	0.292641
ENSMUSG00000073096	Lrrc61	protein_coding	6	leucine rich repeat containing 61	LRRC61	343.887	0.366087	0.237101	0.0705854	3.36063	0.000777654	0.292641
ENSMUSG00000078496	Zfp982	protein_coding	4	zinc finger protein 982		54.4646	1.12642	0.136257	0.0552054	3.31787	0.000907066	0.3247
ENSMUSG00000026249	Serpine2	protein_coding	1	serine (or cysteine) peptidase inhibitor, clade E, member 2	SERPINE2	3217.08	0.197623	0.169956	0.0513529	3.30803	0.000939534	0.330898
ENSMUSG00000021786	Oxsm	protein_coding	14	3-oxoacyl-ACP synthase, mitochondrial	OXSM	164.733	-0.485014	-0.243066	0.07391	-3.29839	0.000972409	0.331774
ENSMUSG00000048148	Nwd1	protein_coding	8	NACHT and WD repeat domain containing 1	NWD1	2141.8	0.197114	0.169375	0.0513416	3.30047	0.00096524	0.331774
ENSMUSG00000032262	Elovl4	protein_coding	9	elongation of very long chain fatty acids (FEN1/Elo2, SUR4/Elo3, yeast)-like 4	ELOVL4	1138.9	0.24235	0.193863	0.0590255	3.28827	0.00100804	0.33864
ENSMUSG00000023764	Sfi1	protein_coding	11	Sfi1 homolog, spindle assembly associated (yeast)	SFI1	476.614	-0.399864	-0.24337	0.0725672	-3.27356	0.00106202	0.351368
ENSMUSG00000039410	Prdm16	protein_coding	4	PR domain containing 16	PRDM16	152.605	0.59092	0.227642	0.0724345	3.2568	0.00112674	0.367216
ENSMUSG00000033174	Mgll	protein_coding	6	monoglyceride lipase	MGLL	988.995	0.258672	0.200912	0.061706	3.24948	0.00115617	0.371267
ENSMUSG00000041936	Agrn	protein_coding	4	agrin	AGRN	2361.16	-0.241043	-0.193308	0.0593393	-3.24163	0.00118849	0.376114
ENSMUSG00000086118	Gm14169	processed_transcript	2	predicted gene 14169		46.6329	-0.942084	-0.192829	0.0600114	-3.2204	0.00128013	0.399326
ENSMUSG00000056054	S100a8	protein_coding	3	S100 calcium binding protein A8 (calgranulin A)	S100A8	4.40423	-3.76271	-0.07008	0.0240483	-3.20861	0.00133376	0.410198
ENSMUSG00000020520	Galnt10	protein_coding	11	polypeptide N-acetylgalactosaminyltransferase 10	GALNT10	502.956	0.284919	0.208902	0.0653693	3.19563	0.00139528	0.423157
ENSMUSG00000018893	Mb	protein_coding	15	myoglobin	MB	6.94429	-3.40455	-0.0714487	0.0246431	-3.18483	0.00144838	0.432835
ENSMUSG00000018909	Arrb1	protein_coding	7	arrestin, beta 1	ARRB1	5689.5	0.157418	0.141489	0.0445846	3.17343	0.00150648	0.432835
ENSMUSG00000029816	Gpnmb	protein_coding	6	glycoprotein (transmembrane) nmb	GPNMB	41.1498	-3.72966	-0.0323884	0.0188819	-3.17375	0.00150485	0.432835
ENSMUSG00000033705	Stard9	protein_coding	2	START domain containing 9	STARD9	888.395	-0.29189	-0.209674	0.0662915	-3.17417	0.00150267	0.432835
ENSMUSG00000030286	Emc3	protein_coding	6	ER membrane protein complex subunit 3	EMC3	1193.82	0.225902	0.183083	0.0579171	3.16169	0.00156856	0.444818
ENSMUSG00000009621	Vav2	protein_coding	2	vav 2 oncogene	VAV2	709.372	0.23961	0.189499	0.0601121	3.15232	0.0016198	0.447697
ENSMUSG00000026082	Rev1	protein_coding	1	REV1, DNA directed polymerase	REV1	1004.17	-0.214662	-0.176787	0.056294	-3.14143	0.00168122	0.447697
ENSMUSG00000027438	Napb	protein_coding	2	N-ethylmaleimide sensitive fusion protein attachment protein beta	NAPB	10502.3	0.140449	0.128704	0.0409517	3.14237	0.00167585	0.447697
ENSMUSG00000028838	Extl1	protein_coding	4	exostosin-like glycosyltransferase 1	EXTL1	434.213	0.295639	0.210199	0.0669008	3.14734	0.00164763	0.447697
ENSMUSG00000031762	Mt2	protein_coding	8	metallothionein 2	MT2A	976.674	0.286078	0.206044	0.0659692	3.14542	0.00165851	0.447697
ENSMUSG00000020900	Myh10	protein_coding	11	myosin, heavy polypeptide 10, non-muscle	MYH10	4349.36	-0.188428	-0.160909	0.0516118	-3.13197	0.00173637	0.456813
ENSMUSG00000019789	Hey2	protein_coding	10	hairy/enhancer-of-split related with YRPW motif 2	HEY2	199.924	0.419986	0.229523	0.0735721	3.12416	0.00178311	0.463524
ENSMUSG00000030682	Cdipt	protein_coding	7	CDP-diacylglycerol--inositol 3-phosphatidyltransferase (phosphatidylinositol synthase)	CDIPT	1118.75	0.210078	0.173942	0.055773	3.11904	0.00181442	0.464563
ENSMUSG00000037692	Ahdc1	protein_coding	4	AT hook, DNA binding motif, containing 1	AHDC1	471.042	-0.327824	-0.218437	0.0698259	-3.11454	0.00184233	0.464563
ENSMUSG00000063801	Ap3s2	protein_coding	7	adaptor-related protein complex 3, sigma 2 subunit	AP3S2	1640.43	0.213306	0.175588	0.0563996	3.11316	0.00185093	0.464563
ENSMUSG00000026830	Ermn	protein_coding	2	ermin, ERM-like protein	ERMN	6174.5	-0.182914	-0.157901	0.0508444	-3.10425	0.00190759	0.473343
ENSMUSG00000029086	Prom1	protein_coding	5	prominin 1	PROM1	421.582	0.378113	0.224226	0.0726134	3.08826	0.0020133	0.48917
ENSMUSG00000039463	Slc9a8	protein_coding	2	solute carrier family 9 (sodium/hydrogen exchanger), member 8	SLC9A8	968.762	0.232542	0.184734	0.0597884	3.08784	0.00201618	0.48917
ENSMUSG00000039252	Lgi2	protein_coding	5	leucine-rich repeat LGI family, member 2	LGI2	3903.43	-0.178162	-0.154417	0.050134	-3.08238	0.00205351	0.492164
ENSMUSG00000050796	B3galt6	protein_coding	4	UDP-Gal:betaGal beta 1,3-galactosyltransferase, polypeptide 6	B3GALT6	178.197	0.430116	0.227023	0.0737877	3.07948	0.0020736	0.492164
ENSMUSG00000047793	Sned1	protein_coding	1	sushi, nidogen and EGF-like domains 1	SNED1	457.701	-0.350213	-0.219589	0.0714545	-3.07508	0.00210449	0.494126
ENSMUSG00000038156	Spon1	protein_coding	7	spondin 1, (f-spondin) extracellular matrix protein	SPON1	1637.91	0.252245	0.192892	0.062771	3.06995	0.00214094	0.497335
ENSMUSG00000035545	Leng8	protein_coding	7	leukocyte receptor cluster (LRC) member 8	LENG8	1274.8	-0.307087	-0.210551	0.0686737	-3.06197	0.00219888	0.505418
ENSMUSG00000037742	Eef1a1	protein_coding	9	eukaryotic translation elongation factor 1 alpha 1	EEF1A1	27684.9	0.1353	0.124159	0.0406257	3.05632	0.00224069	0.506222
ENSMUSG00000038026	Kcnj9	protein_coding	1	potassium inwardly-rectifying channel, subfamily J, member 9	KCNJ9	696.888	0.281227	0.202888	0.0663253	3.05525	0.00224874	0.506222
ENSMUSG00000020571	Pdia6	protein_coding	12	protein disulfide isomerase associated 6	PDIA6	1403.89	0.193669	0.163503	0.0535974	3.0507	0.00228308	0.508707
ENSMUSG00000015647	Lama5	protein_coding	2	laminin, alpha 5	LAMA5	203.89	-0.489535	-0.221666	0.0736582	-3.04011	0.00236493	0.511655
ENSMUSG00000047281	Sfn	protein_coding	4	stratifin	SFN	34.8865	0.954179	0.176965	0.0577627	3.04484	0.00232807	0.511655
ENSMUSG00000097360	9430065F17Rik	antisense	13	RIKEN cDNA 9430065F17 gene		15.6118	1.39958	0.132898	0.0442803	3.0399	0.00236661	0.511655
ENSMUSG00000097638	Carlr	protein_coding	2	cardiac and apoptosis-related long non-coding RNA		59.5376	0.700447	0.207201	0.0673507	3.03632	0.00239485	0.512685
ENSMUSG00000056445	Hoxaas2	processed_transcript	6	Hoxa cluster antisense RNA 2		35.4873	-0.942867	-0.173493	0.0578943	-3.02769	0.00246428	0.522428
ENSMUSG00000028657	Ppt1	protein_coding	4	palmitoyl-protein thioesterase 1	PPT1	2293.63	-0.277349	-0.200144	0.0662503	-3.02088	0.00252041	0.529189
ENSMUSG00000024393	Prrc2a	protein_coding	17	proline-rich coiled-coil 2A	PRRC2A	1062.94	-0.262963	-0.195457	0.0647355	-3.01057	0.00260761	0.542284
ENSMUSG00000020424	Castor1	protein_coding	11	cytosolic arginine sensor for mTORC1 subunit 1	CASTOR1	128.005	0.486223	0.219709	0.0736165	3.00014	0.00269852	0.552882
ENSMUSG00000021070	Bdkrb2	protein_coding	12	bradykinin receptor, beta 2	BDKRB2	188.466	0.492414	0.216012	0.073513	2.9961	0.00273453	0.552882
ENSMUSG00000038780	Smurf1	protein_coding	5	SMAD specific E3 ubiquitin protein ligase 1	SMURF1	776.948	0.225844	0.179275	0.0598026	2.99767	0.00272049	0.552882
ENSMUSG00000018547	Pip4k2b	protein_coding	11	phosphatidylinositol-5-phosphate 4-kinase, type II, beta	PIP4K2B	2180.82	0.164072	0.14409	0.0483563	2.97951	0.0028871	0.567953
ENSMUSG00000026574	Dpt	protein_coding	1	dermatopontin	DPT	27.5477	-1.4789	-0.122665	0.0418126	-2.98075	0.00287542	0.567953
ENSMUSG00000028600	Podn	protein_coding	4	podocan	PODN	21.5772	-1.46081	-0.121232	0.0419705	-2.98245	0.00285951	0.567953
ENSMUSG00000073733	Cplane2	protein_coding	4	ciliogenesis and planar polarity effector 2	CPLANE2	22.9012	1.17845	0.145076	0.0491874	2.97295	0.0029495	0.569958
ENSMUSG00000103183	Gm37090	TEC	4	predicted gene, 37090		58.7069	0.711224	0.19783	0.066307	2.97316	0.00294754	0.569958
ENSMUSG00000029307	Dmp1	protein_coding	5	dentin matrix protein 1	DMP1	201.157	-0.488875	-0.22236	0.0734859	-2.9612	0.0030644	0.581952
ENSMUSG00000073643	Wdfy1	protein_coding	1	WD repeat and FYVE domain containing 1	WDFY1	552.88	-0.95728	-0.16797	0.0559498	-2.96116	0.00306487	0.581952
ENSMUSG00000111325	Gm47140	sense_intronic	9	predicted gene, 47140		24.7365	-1.06201	-0.153623	0.0527968	-2.94613	0.00321782	0.605726
ENSMUSG00000020473	Aebp1	protein_coding	11	AE binding protein 1	AEBP1	471.373	-0.409772	-0.215664	0.0738074	-2.92226	0.00347504	0.643059
ENSMUSG00000036181	H1f2	protein_coding	13	H1.2 linker histone, cluster member	H1-2	615.537	0.264769	0.190537	0.0658301	2.9247	0.00344786	0.643059
ENSMUSG00000020289	Nprl3	protein_coding	11	nitrogen permease regulator-like 3	NPRL3	434.62	-0.319783	-0.206004	0.0707671	-2.9095	0.00362005	0.658728
ENSMUSG00000093880	Tmem181c-ps	unprocessed_pseudogene	17	transmembrane protein 181C, pseudogene		117.508	0.602306	0.203692	0.069976	2.91038	0.00360994	0.658728
ENSMUSG00000038227	Hoxa9	protein_coding	6	homeobox A9	HOXA9	500.696	0.784064	0.155403	0.0623466	2.90591	0.00366183	0.660824
ENSMUSG00000029093	Sorcs2	protein_coding	5	sortilin-related VPS10 domain containing receptor 2	SORCS2	670.606	0.280428	0.194569	0.0677337	2.89805	0.00375485	0.668707
ENSMUSG00000063524	Eno1	protein_coding	4	enolase 1, alpha non-neuron	ENO1	6742.48	0.235592	0.178396	0.0624266	2.89706	0.00376676	0.668707
ENSMUSG00000005882	Uqcc1	protein_coding	2	ubiquinol-cytochrome c reductase complex assembly factor 1	UQCC1	1253.99	0.186443	0.156722	0.0541855	2.89041	0.00384743	0.674603
ENSMUSG00000027472	Pdrg1	protein_coding	2	p53 and DNA damage regulated 1	PDRG1	594.756	0.269234	0.192363	0.066679	2.88924	0.00386176	0.674603
ENSMUSG00000026922	Agpat2	protein_coding	2	1-acylglycerol-3-phosphate O-acyltransferase 2 (lysophosphatidic acid acyltransferase, beta)	AGPAT2	38.5552	-1.10946	-0.152575	0.0502845	-2.88219	0.00394925	0.67466
ENSMUSG00000028967	Errfi1	protein_coding	4	ERBB receptor feedback inhibitor 1	ERRFI1	1251.69	0.217493	0.172508	0.059866	2.88175	0.00395477	0.67466
ENSMUSG00000105692	Gm43737	TEC	3	predicted gene 43737		122.106	0.509454	0.2132	0.0727787	2.88264	0.00394359	0.67466
ENSMUSG00000031980	Agt	protein_coding	8	angiotensinogen (serpin peptidase inhibitor, clade A, member 8)	AGT	3652.14	0.175134	0.149438	0.0520313	2.87817	0.00399994	0.677075
ENSMUSG00000029415	Sdad1	protein_coding	5	SDA1 domain containing 1	SDAD1	510.622	-0.280504	-0.195242	0.0679756	-2.87197	0.00407916	0.679054
ENSMUSG00000039218	Srrm2	protein_coding	17	serine/arginine repetitive matrix 2	SRRM2	4236.57	-0.20919	-0.16839	0.0586326	-2.86998	0.00410492	0.679054
ENSMUSG00000097589	Dleu2	processed_transcript	14	deleted in lymphocytic leukemia, 2		299.055	-0.347565	-0.210121	0.0724438	-2.87135	0.00408723	0.679054
ENSMUSG00000057841	Rpl32	protein_coding	6	ribosomal protein L32	RPL32	1690.24	0.188114	0.157056	0.0548844	2.8615	0.00421646	0.692261
ENSMUSG00000045662	Henmt1	protein_coding	3	HEN1 methyltransferase homolog 1 (Arabidopsis)	HENMT1	8.72169	1.87363	0.0908127	0.0333665	2.8417	0.0044874	0.731245
ENSMUSG00000038150	Ormdl3	protein_coding	11	ORM1-like 3 (S. cerevisiae)	ORMDL3	786.263	0.222755	0.173674	0.0612788	2.83355	0.00460334	0.744582
ENSMUSG00000031610	Scrg1	protein_coding	8	scrapie responsive gene 1	SCRG1	395.791	0.282815	0.192749	0.0686238	2.82493	0.00472902	0.752338
ENSMUSG00000064371	mt-Tt	Mt_tRNA	MT	mitochondrially encoded tRNA threonine	TRNT	30.022	-0.93706	-0.156551	0.0556491	-2.82651	0.00470585	0.752338
ENSMUSG00000087259	2610035D17Rik	lincRNA	11	RIKEN cDNA 2610035D17 gene		204.142	0.376544	0.208537	0.0735147	2.8232	0.00475465	0.752338
ENSMUSG00000102234	Gm37885	antisense	1	predicted gene, 37885		207.463	0.506712	0.197908	0.0725388	2.81845	0.00482568	0.758082
ENSMUSG00000028976	Slc2a5	protein_coding	4	solute carrier family 2 (facilitated glucose transporter), member 5	SLC2A5	56.0539	0.788096	0.167308	0.0611856	2.80989	0.00495591	0.77298
ENSMUSG00000021709	Erbin	protein_coding	13	Erbb2 interacting protein	ERBIN	6321.19	-0.143073	-0.127767	0.0456542	-2.79916	0.00512353	0.792043
ENSMUSG00000052229	Gpr17	protein_coding	18	G protein-coupled receptor 17	GPR17	630.247	0.3233	0.200534	0.0717247	2.79746	0.00515067	0.792043
ENSMUSG00000022843	Clcn2	protein_coding	16	chloride channel, voltage-sensitive 2	CLCN2	920.034	-0.19237	-0.157959	0.0566402	-2.78863	0.00529314	0.796207
ENSMUSG00000028755	Cda	protein_coding	4	cytidine deaminase	CDA	138.798	0.426668	0.205623	0.0738739	2.78678	0.00532351	0.796207
ENSMUSG00000060036	Rpl3	protein_coding	15	ribosomal protein L3	RPL3	6343.74	0.173731	0.147607	0.0529281	2.78677	0.0053236	0.796207
ENSMUSG00000112907	Gm47015	lincRNA	10	predicted gene, 47015		116.683	-3.57519	-0.0414941	0.0182576	-2.78736	0.00531389	0.796207
ENSMUSG00000000823	Zfp512b	protein_coding	2	zinc finger protein 512B	ZNF512B	532.185	-0.264549	-0.186049	0.0673679	-2.76976	0.00560975	0.799833
ENSMUSG00000020836	Coro6	protein_coding	11	coronin 6	CORO6	406.222	-0.281068	-0.189847	0.0690974	-2.75378	0.00589115	0.799833
ENSMUSG00000022766	Serpind1	protein_coding	16	serine (or cysteine) peptidase inhibitor, clade D, member 1	SERPIND1	275.379	-0.35255	-0.200542	0.0731289	-2.7572	0.00582986	0.799833
ENSMUSG00000023147	Get1	protein_coding	16	guided entry of tail-anchored proteins factor 1	GET1	1278.75	0.173962	0.147325	0.0531649	2.77257	0.00556151	0.799833
ENSMUSG00000028763	Hspg2	protein_coding	4	perlecan (heparan sulfate proteoglycan 2)	HSPG2	158.999	-1.00719	-0.142247	0.0516238	-2.76381	0.00571301	0.799833
ENSMUSG00000030088	Aldh1l1	protein_coding	6	aldehyde dehydrogenase 1 family, member L1	ALDH1L1	1397.34	0.187079	0.154613	0.0558538	2.77151	0.00557977	0.799833
ENSMUSG00000031431	Tsc22d3	protein_coding	X	TSC22 domain family, member 3	TSC22D3	3181.62	0.1477	0.130513	0.0473531	2.75701	0.00583322	0.799833
ENSMUSG00000031765	Mt1	protein_coding	8	metallothionein 1	MT1A,MT1B,MT1E,MT1F,MT1G,MT1H,MT1M,MT1X	3087.88	0.18177	0.151107	0.0548448	2.76791	0.00564169	0.799833
ENSMUSG00000036019	Tmtc2	protein_coding	10	transmembrane and tetratricopeptide repeat containing 2	TMTC2	528.118	0.296959	0.189779	0.0703776	2.75344	0.00589729	0.799833
ENSMUSG00000050786	Ccdc126	protein_coding	6	coiled-coil domain containing 126	CCDC126	290.585	0.411835	0.20692	0.0739099	2.7577	0.00582096	0.799833
ENSMUSG00000052336	Cx3cr1	protein_coding	9	chemokine (C-X3-C motif) receptor 1	CX3CR1	720.264	0.215876	0.168714	0.0611091	2.75971	0.0057853	0.799833
ENSMUSG00000058600	Rpl30	protein_coding	15	ribosomal protein L30	RPL30	1671.93	0.190333	0.156544	0.0564189	2.77643	0.00549603	0.799833
ENSMUSG00000064945	Rny3	misc_RNA	6	RNA, Y3 small cytoplasmic (associated with Ro protein)		502.921	-0.290455	-0.193582	0.0696716	-2.77893	0.00545384	0.799833
ENSMUSG00000091931	Gon7	protein_coding	12	GON7 subunit of KEOPS complex	GON7	115.851	0.60327	0.18506	0.0687666	2.77002	0.00560536	0.799833
ENSMUSG00000097180	2700038G22Rik	lincRNA	5	RIKEN cDNA 2700038G22 gene		25.0683	1.27486	0.117384	0.0438047	2.78185	0.00540506	0.799833
ENSMUSG00000024213	Nudt3	protein_coding	17	nudix (nucleotide diphosphate linked moiety X)-type motif 3	NUDT3	4234.21	0.142522	0.126908	0.0461954	2.74679	0.0060181	0.806784
ENSMUSG00000030795	Fus	protein_coding	7	fused in sarcoma	FUS	541.989	-0.243119	-0.179017	0.0651423	-2.74656	0.00602243	0.806784
ENSMUSG00000027400	Pdyn	protein_coding	2	prodynorphin	PDYN	260.088	0.393428	0.205427	0.0738777	2.74184	0.00610963	0.813475
ENSMUSG00000026701	Prdx6	protein_coding	1	peroxiredoxin 6	PRDX6	4802.09	0.142552	0.126881	0.0463713	2.73401	0.00625676	0.828016
ENSMUSG00000030654	Arl6ip1	protein_coding	7	ADP-ribosylation factor-like 6 interacting protein 1	ARL6IP1	4353.39	0.136223	0.122242	0.0448423	2.72636	0.00640379	0.841335
ENSMUSG00000078877	Gm14295	protein_coding	2	predicted gene 14295		357.765	0.308844	0.194467	0.0713746	2.72478	0.00643446	0.841335
ENSMUSG00000026853	Crat	protein_coding	2	carnitine acetyltransferase	CRAT	854.547	0.202284	0.161073	0.0593283	2.7213	0.00650265	0.845189
ENSMUSG00000073436	Eme2	protein_coding	17	essential meiotic structure-specific endonuclease subunit 2	EME2	648.796	-0.216052	-0.167612	0.0616535	-2.71769	0.00657403	0.849411
ENSMUSG00000026000	Lancl1	protein_coding	1	LanC (bacterial lantibiotic synthetase component C)-like 1	LANCL1	2283.45	0.174558	0.146776	0.0540829	2.71377	0.00665233	0.849475
ENSMUSG00000078517	Emc1	protein_coding	4	ER membrane protein complex subunit 1	EMC1	2291.86	0.162784	0.139941	0.0514843	2.71519	0.00662387	0.849475
ENSMUSG00000034656	Cacna1a	protein_coding	8	calcium channel, voltage-dependent, P/Q type, alpha 1A subunit	CACNA1A	1020.94	-0.238102	-0.175762	0.0649137	-2.71049	0.00671839	0.852923
ENSMUSG00000035227	Spcs2	protein_coding	7	signal peptidase complex subunit 2 homolog (S. cerevisiae)	SPCS2	1063.68	0.18135	0.15063	0.0555565	2.7085	0.0067588	0.853094
ENSMUSG00000036450	Hif1an	protein_coding	19	hypoxia-inducible factor 1, alpha subunit inhibitor	HIF1AN	957.222	0.200806	0.159901	0.0593077	2.70304	0.00687077	0.859669
ENSMUSG00000097428	AW047730	processed_transcript	3	expressed sequence AW047730		383.799	0.294821	0.18894	0.070622	2.70213	0.00688964	0.859669
ENSMUSG00000032305	Fam219b	protein_coding	9	family with sequence similarity 219, member B	FAM219B	397.855	0.255383	0.180899	0.06717	2.69366	0.0070673	0.871774
ENSMUSG00000055322	Tns1	protein_coding	1	tensin 1	TNS1	1499.67	-0.485739	-0.197507	0.0724714	-2.69182	0.00710642	0.871774
ENSMUSG00000058586	Serhl	protein_coding	15	serine hydrolase-like	SERHL2	223.023	-0.418827	-0.198801	0.0738236	-2.6929	0.00708336	0.871774
ENSMUSG00000020946	Gosr2	protein_coding	11	golgi SNAP receptor complex member 2	GOSR2	1650.89	0.160649	0.13795	0.0514853	2.67949	0.00737343	0.87429
ENSMUSG00000021508	Cxcl14	protein_coding	13	chemokine (C-X-C motif) ligand 14	CXCL14	777.147	0.266667	0.182309	0.0684771	2.67964	0.00737019	0.87429
ENSMUSG00000032181	Scg3	protein_coding	9	secretogranin III	SCG3	3670.71	0.146091	0.128669	0.0478746	2.68822	0.00718335	0.87429
ENSMUSG00000032221	Mns1	protein_coding	9	meiosis-specific nuclear structural protein 1	MNS1	96.7795	-0.635191	-0.181481	0.0665947	-2.68527	0.00724716	0.87429
ENSMUSG00000058246	Gm10037	protein_coding	13	predicted gene 10037		31.9316	0.907976	0.145532	0.0546642	2.68567	0.00723847	0.87429
ENSMUSG00000078875	Gm14419	protein_coding	2	predicted gene 14419		12.5703	1.54992	0.0873917	0.0368325	2.6787	0.0073909	0.87429
ENSMUSG00000082769	Gm15793	processed_pseudogene	1	predicted gene 15793		4.34583	2.64199	0.0628934	0.0249117	2.67796	0.0074072	0.87429
ENSMUSG00000020646	Mboat2	protein_coding	12	membrane bound O-acyltransferase domain containing 2	MBOAT2	2653.71	0.156691	0.135302	0.0506669	2.67208	0.00753816	0.880496
ENSMUSG00000021573	Tppp	protein_coding	13	tubulin polymerization promoting protein	TPPP	9819.63	0.116755	0.107373	0.0401851	2.67197	0.00754065	0.880496
ENSMUSG00000027209	Fam227b	protein_coding	2	family with sequence similarity 227, member B	FAM227B	24.8593	-1.03169	-0.12936	0.0503817	-2.66664	0.0076614	0.880496
ENSMUSG00000037111	Setd7	protein_coding	3	SET domain containing (lysine methyltransferase) 7	SETD7	2902.16	-0.140944	-0.125138	0.0468322	-2.66884	0.00761142	0.880496
ENSMUSG00000049866	Arl4c	protein_coding	1	ADP-ribosylation factor-like 4C	ARL4C	1602.34	0.167905	0.142124	0.0532709	2.6684	0.00762129	0.880496
ENSMUSG00000017009	Sdc4	protein_coding	2	syndecan 4	SDC4	3082.15	0.164255	0.139601	0.0525908	2.65888	0.00784006	0.884301
ENSMUSG00000020271	Fbxw11	protein_coding	11	F-box and WD-40 domain protein 11	FBXW11	2817.7	0.147575	0.129349	0.0486544	2.6582	0.00785584	0.884301
ENSMUSG00000026864	Hspa5	protein_coding	2	heat shock protein 5	HSPA5	4487.31	0.136529	0.121789	0.0458392	2.65744	0.00787362	0.884301
ENSMUSG00000030218	Mgp	protein_coding	6	matrix Gla protein	MGP	76.7766	-0.811968	-0.172122	0.0583899	-2.6606	0.00780012	0.884301
ENSMUSG00000050550	Gm11868	processed_pseudogene	4	predicted gene 11868		38.8413	-1.08023	-0.120847	0.0479567	-2.65644	0.00789699	0.884301
ENSMUSG00000015243	Abca1	protein_coding	4	ATP-binding cassette, sub-family A (ABC1), member 1	ABCA1	1616.97	-0.195036	-0.156283	0.0589649	-2.65078	0.00803058	0.894672
ENSMUSG00000000938	Hoxa10	protein_coding	6	homeobox A10	HOXA10	170.129	2.21449	0.0346616	0.025453	2.64405	0.00819208	0.899504
ENSMUSG00000028495	Rps6	protein_coding	4	ribosomal protein S6	RPS6	3300.57	0.140904	0.12459	0.0471488	2.64499	0.00816942	0.899504
ENSMUSG00000031691	Tnpo2	protein_coding	8	transportin 2 (importin 3, karyopherin beta 2b)	TNPO2	3139.27	0.137622	0.122454	0.0463116	2.64382	0.00819753	0.899504
ENSMUSG00000034714	Ttyh2	protein_coding	11	tweety family member 2	TTYH2	3044.24	0.188845	0.153373	0.0579472	2.64095	0.00826735	0.902629
ENSMUSG00000053293	Pom121	protein_coding	5	nuclear pore membrane protein 121	POM121	211.534	-0.375479	-0.194493	0.0738579	-2.63583	0.00839309	0.911799
ENSMUSG00000008683	Rps15a	protein_coding	7	ribosomal protein S15A	RPS15A	2035.68	0.208499	0.160316	0.0615775	2.62925	0.00855744	0.921166
ENSMUSG00000032263	Bckdhb	protein_coding	9	branched chain ketoacid dehydrogenase E1, beta polypeptide	BCKDHB	624.394	0.246918	0.1762	0.0669073	2.629	0.00856369	0.921166
ENSMUSG00000020241	Col6a2	protein_coding	10	collagen, type VI, alpha 2	COL6A2	96.4174	-0.641484	-0.17195	0.0655917	-2.62449	0.00867796	0.92435
ENSMUSG00000074794	Arrdc3	protein_coding	13	arrestin domain containing 3	ARRDC3	3390.49	0.176786	0.146501	0.055762	2.62565	0.00864833	0.92435
ENSMUSG00000002250	Ppard	protein_coding	17	peroxisome proliferator activator receptor delta	PPARD	153.778	-0.382038	-0.193727	0.0739024	-2.62141	0.00875667	0.9276
ENSMUSG00000030409	Dmpk	protein_coding	7	dystrophia myotonica-protein kinase	DMPK	156.128	-0.409981	-0.191102	0.0738013	-2.61834	0.0088359	0.9276
ENSMUSG00000078201	Tmem203	protein_coding	2	transmembrane protein 203	TMEM203	120.001	0.491392	0.187086	0.0719061	2.61933	0.00881024	0.9276
ENSMUSG00000078706	Gm53	lincRNA	11	predicted gene 53		92.0867	1.28929	0.0749501	0.0408507	2.61018	0.0090495	0.945478
ENSMUSG00000022476	Polr3h	protein_coding	15	polymerase (RNA) III (DNA directed) polypeptide H	POLR3H	691.114	0.234599	0.171258	0.0656892	2.60399	0.00921459	0.957088
ENSMUSG00000025145	Lrrc45	protein_coding	11	leucine rich repeat containing 45	LRRC45	611.788	-0.235072	-0.171351	0.0657554	-2.60274	0.00924829	0.957088
ENSMUSG00000000194	Gpr107	protein_coding	2	G protein-coupled receptor 107	GPR107	1093.53	0.177885	0.146242	0.0565181	2.58778	0.00965976	0.963153
ENSMUSG00000001761	Smo	protein_coding	6	smoothened, frizzled class receptor	SMO	571.305	0.223854	0.16691	0.0643819	2.59214	0.00953806	0.963153
ENSMUSG00000003970	Rpl8	protein_coding	15	ribosomal protein L8	RPL8	3903.64	0.136731	0.121205	0.0468512	2.58781	0.00965883	0.963153
ENSMUSG00000006392	Med8	protein_coding	4	mediator complex subunit 8	MED8	332.916	0.280398	0.181939	0.0704758	2.588	0.00965362	0.963153
ENSMUSG00000021113	Snapc1	protein_coding	12	small nuclear RNA activating complex, polypeptide 1	SNAPC1	824.561	0.204216	0.159274	0.0613302	2.59394	0.00948836	0.963153
ENSMUSG00000035000	Dpp4	protein_coding	2	dipeptidylpeptidase 4	DPP4	32.7936	-1.10972	-0.119039	0.0461626	-2.59344	0.00950218	0.963153
ENSMUSG00000068115	Ninl	protein_coding	2	ninein-like	NINL	89.1237	-0.501567	-0.184971	0.0714302	-2.59548	0.00944585	0.963153
ENSMUSG00000102748	Pcdhgb2	protein_coding	18	protocadherin gamma subfamily B, 2	PCDHGB2	169.507	0.375465	0.191058	0.0738966	2.59083	0.00957435	0.963153
ENSMUSG00000021504	B4galt7	protein_coding	13	xylosylprotein beta1,4-galactosyltransferase, polypeptide 7 (galactosyltransferase I)	B4GALT7	416.582	0.257056	0.175374	0.0686317	2.56725	0.0102508	0.980948
ENSMUSG00000024870	Rab1b	protein_coding	19	RAB1B, member RAS oncogene family	RAB1B	1664.57	0.174413	0.143962	0.0562295	2.55745	0.0105442	0.980948
ENSMUSG00000026837	Col5a1	protein_coding	2	collagen, type V, alpha 1	COL5A1	127.694	-0.570756	-0.176568	0.0683366	-2.57686	0.00997015	0.980948
ENSMUSG00000027599	Armc1	protein_coding	3	armadillo repeat containing 1	ARMC1	1179.08	0.194268	0.154003	0.0600302	2.56197	0.010408	0.980948
ENSMUSG00000028782	Adgrb2	protein_coding	4	adhesion G protein-coupled receptor B2	ADGRB2	1523.41	-0.209194	-0.162323	0.0625939	-2.55925	0.0104899	0.980948
ENSMUSG00000030314	Atg7	protein_coding	6	autophagy related 7	ATG7	432.293	0.233617	0.168916	0.0661036	2.55716	0.0105531	0.980948
ENSMUSG00000032425	Zfp949	protein_coding	9	zinc finger protein 949		518.07	-0.281469	-0.180727	0.0707795	-2.55996	0.0104685	0.980948
ENSMUSG00000035805	Mlc1	protein_coding	15	megalencephalic leukoencephalopathy with subcortical cysts 1 homolog (human)	MLC1	3378.81	0.134523	0.11964	0.0463811	2.57933	0.00989931	0.980948
ENSMUSG00000036053	Fmnl2	protein_coding	2	formin-like 2	FMNL2	1704.56	-0.159303	-0.135635	0.0527806	-2.56533	0.0103077	0.980948
ENSMUSG00000036636	Clcn7	protein_coding	17	chloride channel, voltage-sensitive 7	CLCN7	1063.76	0.206974	0.159244	0.0622492	2.55871	0.0105061	0.980948
ENSMUSG00000039461	Tcta	protein_coding	9	T cell leukemia translocation altered gene	TCTA	540.776	0.230819	0.168681	0.0656379	2.56625	0.0102805	0.980948
ENSMUSG00000051864	Tbc1d22a	protein_coding	15	TBC1 domain family, member 22a	TBC1D22A	565.52	0.234452	0.169165	0.0662115	2.55703	0.010557	0.980948
ENSMUSG00000060678	H4c3	protein_coding	13	H4 clustered histone 3	H4C6	433.504	0.346121	0.188231	0.0736059	2.56461	0.0103291	0.980948
ENSMUSG00000061360	Phf5a	protein_coding	15	PHD finger protein 5A	PHF5A	345.05	0.256481	0.175612	0.068665	2.55815	0.0105231	0.980948
ENSMUSG00000061393	Acvr2b	protein_coding	9	activin receptor IIB	ACVR2B	112.7	-0.424404	-0.188012	0.0734555	-2.55994	0.0104689	0.980948
ENSMUSG00000106024	A530083M17Rik	TEC	3	RIKEN cDNA A530083M17 gene		43.9737	-0.701863	-0.158603	0.0621275	-2.5626	0.0103893	0.980948
ENSMUSG00000031422	Morf4l2	protein_coding	X	mortality factor 4 like 2	MORF4L2	2977.85	0.141397	0.124017	0.0485657	2.5531	0.0106769	0.987883
ENSMUSG00000000001	Gnai3	protein_coding	3	guanine nucleotide binding protein (G protein), alpha inhibiting 3	GNAI3	839.192	-0.00834542	-0.00695274	0.0612717	-0.106189	0.915433	0.999995
ENSMUSG00000000028	Cdc45	protein_coding	16	cell division cycle 45	CDC45	42.6319	0.220139	0.0444668	0.0592564	0.747026	0.455048	0.999995
ENSMUSG00000000031	H19	lincRNA	7	H19, imprinted maternally expressed transcript		6.43062	-0.625327	-0.0260254	0.027373	-0.803415	0.421735	0.999995
ENSMUSG00000000037	Scml2	protein_coding	X	Scm polycomb group protein like 2	SCML2	16.5907	-0.452409	-0.0492234	0.0461833	-1.06282	0.287864	0.999995
ENSMUSG00000000049	Apoh	protein_coding	11	apolipoprotein H	APOH	7.62471	0.132489	0.00726961	0.0320695	0.204538	0.837933	0.999995
ENSMUSG00000000056	Narf	protein_coding	11	nuclear prelamin A recognition factor	NARF	1005	0.000628475	0.000562247	0.0570356	0.00901362	0.992808	0.999995
ENSMUSG00000000058	Cav2	protein_coding	6	caveolin 2	CAV2	541.123	-0.0399214	-0.0285058	0.0671483	-0.421482	0.673403	0.999995
ENSMUSG00000000078	Klf6	protein_coding	13	Kruppel-like factor 6	KLF6	674.102	0.0878275	0.0678662	0.0617495	1.1019	0.270507	0.999995
ENSMUSG00000000085	Scmh1	protein_coding	4	sex comb on midleg homolog 1	SCMH1	357.846	-0.0616387	-0.0389837	0.0713214	-0.545494	0.585414	0.999995
ENSMUSG00000000088	Cox5a	protein_coding	9	cytochrome c oxidase subunit 5A	COX5A	1953.25	0.0160478	0.0138897	0.0501953	0.277192	0.781633	0.999995
ENSMUSG00000000093	Tbx2	protein_coding	11	T-box 2	TBX2	22.4694	-0.298358	-0.0405172	0.0495851	-0.774314	0.438745	0.999995
ENSMUSG00000000094	Tbx4	protein_coding	11	T-box 4	TBX4	1.27779	-1.74898	-0.014127	0.0135144	-1.02278	0.30641	0.999995
ENSMUSG00000000120	Ngfr	protein_coding	11	nerve growth factor receptor (TNFR superfamily, member 16)	NGFR	62.2497	-0.106065	-0.0307737	0.067449	-0.464433	0.642337	0.999995
ENSMUSG00000000125	Wnt3	protein_coding	11	wingless-type MMTV integration site family, member 3	WNT3	181.172	0.0328147	0.0161206	0.0738448	0.231619	0.816834	0.999995
ENSMUSG00000000126	Wnt9a	protein_coding	11	wingless-type MMTV integration site family, member 9A	WNT9A	35.4525	0.480841	0.095456	0.059282	1.62769	0.103592	0.999995
ENSMUSG00000000127	Fer	protein_coding	17	fer (fms/fps related) protein kinase	FER	633.528	-0.0312045	-0.0239037	0.0625924	-0.381827	0.702589	0.999995
ENSMUSG00000000131	Xpo6	protein_coding	7	exportin 6	XPO6	1561.7	-0.0816158	-0.0668652	0.0569215	-1.17418	0.240321	0.999995
ENSMUSG00000000134	Tfe3	protein_coding	X	transcription factor E3	TFE3	428.827	-0.109186	-0.0718273	0.0699826	-1.03094	0.30257	0.999995
ENSMUSG00000000142	Axin2	protein_coding	11	axin 2	AXIN2	283.275	-0.151794	-0.0958036	0.0712788	-1.34601	0.178298	0.999995
ENSMUSG00000000148	Brat1	protein_coding	5	BRCA1-associated ATM activator 1	BRAT1	352.983	0.0461253	0.0311412	0.0691884	0.450591	0.652284	0.999995
ENSMUSG00000000149	Gna12	protein_coding	5	guanine nucleotide binding protein, alpha 12	GNA12	3550.51	0.00846115	0.00740514	0.0494831	0.149004	0.88155	0.999995
ENSMUSG00000000154	Slc22a18	protein_coding	7	solute carrier family 22 (organic cation transporter), member 18	SLC22A18	14.2867	0.0968549	0.00421966	0.0409342	0.197851	0.843161	0.999995
ENSMUSG00000000159	Igsf5	protein_coding	16	immunoglobulin superfamily, member 5	IGSF5	9.17326	-0.156007	-0.00696694	0.033103	-0.248557	0.803704	0.999995
ENSMUSG00000000167	Pih1d2	protein_coding	9	PIH1 domain containing 2	PIH1D2	29.8252	-0.389829	-0.0658622	0.0543987	-1.15244	0.249141	0.999995
ENSMUSG00000000168	Dlat	protein_coding	9	dihydrolipoamide S-acetyltransferase (E2 component of pyruvate dehydrogenase complex)	DLAT	2098.27	0.014041	0.0118466	0.0544621	0.216056	0.828944	0.999995
ENSMUSG00000000171	Sdhd	protein_coding	9	succinate dehydrogenase complex, subunit D, integral membrane protein	SDHD	1478.21	0.145752	0.114931	0.0604423	1.89966	0.0574775	0.999995
ENSMUSG00000000182	Fgf23	protein_coding	6	fibroblast growth factor 23	FGF23	4.32732	0.926255	0.0150459	0.02274	0.959613	0.33725	0.999995
ENSMUSG00000000184	Ccnd2	protein_coding	6	cyclin D2	CCND2	435.535	-0.231247	-0.161413	0.0678977	-2.37466	0.017565	0.999995
ENSMUSG00000000197	Nalcn	protein_coding	14	sodium leak channel, non-selective	NALCN	2884.31	0.0305951	0.0270792	0.046911	0.578097	0.563199	0.999995
ENSMUSG00000000202	Btbd17	protein_coding	11	BTB (POZ) domain containing 17	BTBD17	313.088	0.0558602	0.0320879	0.0735637	0.416533	0.67702	0.999995
ENSMUSG00000000214	Th	protein_coding	7	tyrosine hydroxylase	TH	37.6369	-0.0958571	-0.0149423	0.0565857	-0.301777	0.762822	0.999995
ENSMUSG00000000223	Drp2	protein_coding	X	dystrophin related protein 2	DRP2	847.497	0.0136573	0.0107719	0.0597677	0.18146	0.856007	0.999995
ENSMUSG00000000244	Tspan32	protein_coding	7	tetraspanin 32	TSPAN32	8.73747	0.208155	0.0094217	0.0319954	0.320239	0.748787	0.999995
ENSMUSG00000000247	Lhx2	protein_coding	2	LIM homeobox protein 2	LHX2	2.92607	-0.264426	-0.00279849	0.0187601	-0.229867	0.818195	0.999995
ENSMUSG00000000253	Gmpr	protein_coding	13	guanosine monophosphate reductase	GMPR	1124.44	-0.043004	-0.0351033	0.0571813	-0.614285	0.539027	0.999995
ENSMUSG00000000263	Glra1	protein_coding	11	glycine receptor, alpha 1 subunit	GLRA1	3456.92	-0.0693817	-0.0562522	0.0580387	-0.967822	0.333133	0.999995
ENSMUSG00000000266	Mid2	protein_coding	X	midline 2	MID2	669.358	0.058495	0.0446719	0.0627803	0.711749	0.47662	0.999995
ENSMUSG00000000275	Trim25	protein_coding	11	tripartite motif-containing 25	TRIM25	127.037	0.00282264	0.000755724	0.0733446	0.0168593	0.986549	0.999995
ENSMUSG00000000276	Dgke	protein_coding	11	diacylglycerol kinase, epsilon	DGKE	1697.84	0.0237998	0.020509	0.0509888	0.40234	0.687434	0.999995
ENSMUSG00000000278	Scpep1	protein_coding	11	serine carboxypeptidase 1	SCPEP1	295.046	-0.0441153	-0.0227139	0.0735824	-0.327942	0.742956	0.999995
ENSMUSG00000000282	Mnt	protein_coding	11	max binding protein	MNT	193.024	-0.138812	-0.0776879	0.0733708	-1.05974	0.289262	0.999995
ENSMUSG00000000290	Itgb2	protein_coding	10	integrin beta 2	ITGB2	117.229	0.0462506	0.0221656	0.0731625	0.271049	0.786353	0.999995
ENSMUSG00000000295	Hddc2	protein_coding	10	HD domain containing 2	HDDC2	194.908	-0.0270523	-0.0165586	0.0735764	-0.201307	0.840458	0.999995
ENSMUSG00000000296	Tpd52l1	protein_coding	10	tumor protein D52-like 1	TPD52L1	281.375	-0.0587531	-0.0330778	0.0735003	-0.441795	0.658637	0.999995
ENSMUSG00000000301	Pemt	protein_coding	11	phosphatidylethanolamine N-methyltransferase	PEMT	47.428	0.0381684	0.00623035	0.0617418	0.139132	0.889346	0.999995
ENSMUSG00000000303	Cdh1	protein_coding	8	cadherin 1	CDH1	13.1781	-1.85955	-0.0797978	0.0285306	-2.3264	0.0199971	0.999995
ENSMUSG00000000305	Cdh4	protein_coding	2	cadherin 4	CDH4	224.237	-0.0241899	-0.0119741	0.0737888	-0.173395	0.862341	0.999995
ENSMUSG00000000308	Ckmt1	protein_coding	2	creatine kinase, mitochondrial 1, ubiquitous	CKMT1A,CKMT1B	6577.72	0.0720653	0.0625615	0.0499234	1.254	0.209841	0.999995
ENSMUSG00000000317	Bcl6b	protein_coding	11	B cell CLL/lymphoma 6, member B	BCL6B	33.9485	0.282572	0.0464684	0.0545273	0.841295	0.400183	0.999995
ENSMUSG00000000320	Alox12	protein_coding	11	arachidonate 12-lipoxygenase	ALOX12	6.73639	-0.407909	-0.0182833	0.0311884	-0.592937	0.553223	0.999995
ENSMUSG00000000325	Arvcf	protein_coding	16	armadillo repeat gene deleted in velocardiofacial syndrome	ARVCF	637.162	-0.0752275	-0.0543577	0.0662473	-0.819518	0.412491	0.999995
ENSMUSG00000000326	Comt	protein_coding	16	catechol-O-methyltransferase	COMT	920.155	-0.132832	-0.0980261	0.064808	-1.51738	0.129171	0.999995
ENSMUSG00000000339	Rtca	protein_coding	3	RNA 3'-terminal phosphate cyclase	RTCA	797.373	0.0485336	0.0351804	0.0659585	0.533946	0.593379	0.999995
ENSMUSG00000000340	Dbt	protein_coding	3	dihydrolipoamide branched chain transacylase E2	DBT	396.763	0.0646613	0.0430189	0.0693848	0.626549	0.530955	0.999995
ENSMUSG00000000346	Dazap2	protein_coding	15	DAZ associated protein 2	DAZAP2	1727.74	-0.0568075	-0.0479036	0.0539896	-0.885389	0.375947	0.999995
ENSMUSG00000000355	Mcts1	protein_coding	X	malignant T cell amplified sequence 1	MCTS1	538.861	0.0464641	0.0334009	0.0678442	0.478312	0.632428	0.999995
ENSMUSG00000000359	Rem1	protein_coding	2	rad and gem related GTP binding protein 1	REM1	8.01553	-0.184575	-0.00927184	0.0320062	-0.283569	0.776741	0.999995
ENSMUSG00000000365	Rnf17	protein_coding	14	ring finger protein 17	RNF17	33.7324	0.762132	0.122256	0.054031	2.22426	0.0261309	0.999995
ENSMUSG00000000374	Trappc10	protein_coding	10	trafficking protein particle complex 10	TRAPPC10	3036.91	-0.00528522	-0.00456495	0.050685	-0.0900864	0.928219	0.999995
ENSMUSG00000000378	Ccm2	protein_coding	11	cerebral cavernous malformation 2	CCM2	533.797	0.0168472	0.0125402	0.064722	0.192998	0.846961	0.999995
ENSMUSG00000000384	Tbrg4	protein_coding	11	transforming growth factor beta regulated gene 4	TBRG4	426.397	-0.0987705	-0.0699183	0.0671855	-1.0413	0.297736	0.999995
ENSMUSG00000000386	Mx1	polymorphic_pseudogene	16	MX dynamin-like GTPase 1	MX1,MX2	6.64521	-0.0341178	-0.0180152	0.0276922	-0.0438376	0.965034	0.999995
ENSMUSG00000000392	Fap	protein_coding	2	fibroblast activation protein	FAP	7.84004	-0.901844	-0.0465332	0.0327537	-1.39466	0.163118	0.999995
ENSMUSG00000000399	Ndufa9	protein_coding	6	NADH:ubiquinone oxidoreductase subunit A9	NDUFA9	2020.19	0.0760987	0.0591999	0.0613586	0.965864	0.334112	0.999995
ENSMUSG00000000402	Egfl6	protein_coding	X	EGF-like-domain, multiple 6	EGFL6	124.337	0.334109	0.135641	0.072621	1.87023	0.0614518	0.999995
ENSMUSG00000000409	Lck	protein_coding	4	lymphocyte protein tyrosine kinase	LCK	10.574	0.27079	0.0187503	0.0374417	0.497965	0.618508	0.999995
ENSMUSG00000000416	Cttnbp2	protein_coding	6	cortactin binding protein 2	CTTNBP2	835.861	-0.0627404	-0.0486952	0.0615975	-0.790722	0.429106	0.999995
ENSMUSG00000000420	Galnt1	protein_coding	18	polypeptide N-acetylgalactosaminyltransferase 1	GALNT1	1590.77	-0.0144614	-0.0125839	0.0543202	-0.223379	0.823241	0.999995
ENSMUSG00000000439	Mkrn2	protein_coding	6	makorin, ring finger protein, 2	MKRN2	761.908	0.061785	0.048671	0.0603815	0.806697	0.419841	0.999995
ENSMUSG00000000440	Pparg	protein_coding	6	peroxisome proliferator activated receptor gamma	PPARG	40.46	-0.230854	-0.0486619	0.060066	-0.800572	0.42338	0.999995
ENSMUSG00000000441	Raf1	protein_coding	6	v-raf-leukemia viral oncogene 1	RAF1	1850.19	-0.00261444	-0.00233271	0.0501452	-0.0452201	0.963932	0.999995
ENSMUSG00000000486	Septin1	protein_coding	7	septin 1	SEPTIN1	32.3848	0.284189	0.0466438	0.0547429	0.850317	0.395149	0.999995
ENSMUSG00000000489	Pdgfb	protein_coding	15	platelet derived growth factor, B polypeptide	PDGFB	151.329	-0.190488	-0.0774604	0.0732875	-1.12936	0.258747	0.999995
ENSMUSG00000000530	Acvrl1	protein_coding	15	activin A receptor, type II-like 1	ACVRL1	215.663	0.158377	0.0909472	0.0731364	1.23917	0.215284	0.999995
ENSMUSG00000000531	Grasp	protein_coding	15	GRP1 (general receptor for phosphoinositides 1)-associated scaffold protein		89.8937	0.00863877	0.00489417	0.0705204	0.042887	0.965792	0.999995
ENSMUSG00000000532	Acvr1b	protein_coding	15	activin A receptor, type 1B	ACVR1B	1185.41	0.0240526	0.019657	0.0556364	0.358448	0.720008	0.999995
ENSMUSG00000000538	Tom1l2	protein_coding	11	target of myb1-like 2 (chicken)	TOM1L2	4329.02	0.0525346	0.0449539	0.0518518	0.867601	0.385613	0.999995
ENSMUSG00000000552	Zfp385a	protein_coding	15	zinc finger protein 385A	ZNF385A	256.451	-0.185706	-0.115337	0.0716804	-1.61028	0.107336	0.999995
ENSMUSG00000000555	Itga5	protein_coding	15	integrin alpha 5 (fibronectin receptor alpha)	ITGA5	22.9479	-0.420088	-0.0502018	0.0476574	-1.03425	0.301018	0.999995
ENSMUSG00000000560	Gabra2	protein_coding	5	gamma-aminobutyric acid (GABA) A receptor, subunit alpha 2	GABRA2	1513.35	0.502672	0.0997834	0.0590298	1.69523	0.0900312	0.999995
ENSMUSG00000000561	Wdr77	protein_coding	3	WD repeat domain 77	WDR77	612.416	0.0602547	0.0464542	0.0632117	0.723573	0.469328	0.999995
ENSMUSG00000000562	Adora3	protein_coding	3	adenosine A3 receptor	ADORA3	15.719	0.0932958	0.0103926	0.0453326	0.215863	0.829095	0.999995
ENSMUSG00000000563	Atp5pb	protein_coding	3	ATP synthase peripheral stalk-membrane subunit b	ATP5PB	4301.63	0.0533504	0.0438347	0.0563865	0.778947	0.436011	0.999995
ENSMUSG00000000567	Sox9	protein_coding	11	SRY (sex determining region Y)-box 9	SOX9	219.953	-0.027835	-0.0177198	0.0728966	-0.22241	0.823995	0.999995
ENSMUSG00000000568	Hnrnpd	protein_coding	5	heterogeneous nuclear ribonucleoprotein D	HNRNPD	1047.4	-0.0280023	-0.0226817	0.0580582	-0.390396	0.696244	0.999995
ENSMUSG00000000579	Dynlt1c	protein_coding	17	dynein light chain Tctex-type 1C	DYNLT1	41.2736	-0.120047	-0.0235164	0.0598684	-0.413976	0.678892	0.999995
ENSMUSG00000000581	C1d	protein_coding	11	C1D nuclear receptor co-repressor	C1D	578.544	0.0498056	0.0375442	0.0637178	0.588902	0.555927	0.999995
ENSMUSG00000000594	Gm2a	protein_coding	11	GM2 ganglioside activator protein	GM2A	1770.57	-0.0434313	-0.0369698	0.05341	-0.687629	0.491687	0.999995
ENSMUSG00000000600	Krit1	protein_coding	5	KRIT1, ankyrin repeat containing	KRIT1	1160.63	-0.059178	-0.0468603	0.0600107	-0.780883	0.434871	0.999995
ENSMUSG00000000605	Clcn4	protein_coding	7	chloride channel, voltage-sensitive 4	CLCN4	4333.4	0.0263804	0.0235275	0.0457461	0.51481	0.606686	0.999995
ENSMUSG00000000627	Sema4f	protein_coding	6	sema domain, immunoglobulin domain (Ig), TM domain, and short cytoplasmic domain	SEMA4F	358.608	0.0487586	0.0300471	0.0707456	0.444357	0.656784	0.999995
ENSMUSG00000000628	Hk2	protein_coding	6	hexokinase 2	HK2	118.748	-0.0647378	-0.0284777	0.0735033	-0.393897	0.693657	0.999995
ENSMUSG00000000631	Myo18a	protein_coding	11	myosin XVIIIA	MYO18A	3151.89	0.0142266	0.0111468	0.0591864	0.192174	0.847606	0.999995
ENSMUSG00000000632	Sez6	protein_coding	11	seizure related gene 6	SEZ6	427.134	-0.157914	-0.0925532	0.0728783	-1.26382	0.206296	0.999995
ENSMUSG00000000673	Haao	protein_coding	17	3-hydroxyanthranilate 3,4-dioxygenase	HAAO	5.53734	0.551679	0.0167702	0.0254153	0.659552	0.509541	0.999995
ENSMUSG00000000682	Cd52	protein_coding	4	CD52 antigen	CD52	28.5006	0.463653	0.0749876	0.0543979	1.37254	0.169896	0.999995
ENSMUSG00000000686	Abhd15	protein_coding	11	abhydrolase domain containing 15	ABHD15	40.8936	0.223951	0.0505701	0.0611861	0.802897	0.422034	0.999995
ENSMUSG00000000690	Hoxb6	protein_coding	11	homeobox B6	HOXB6	422.445	0.0615249	0.0421973	0.0682917	0.622763	0.53344	0.999995
ENSMUSG00000000693	Loxl3	protein_coding	6	lysyl oxidase-like 3	LOXL3	82.2431	0.0132416	0.00476707	0.0712211	0.0681015	0.945705	0.999995
ENSMUSG00000000706	Btn1a1	protein_coding	13	butyrophilin, subfamily 1, member A1	BTN1A1	3.86973	0.720532	0.0164579	0.022557	0.755634	0.449869	0.999995
ENSMUSG00000000708	Kat2b	protein_coding	17	K(lysine) acetyltransferase 2B	KAT2B	1585.07	0.0156518	0.0121027	0.0589063	0.213095	0.831253	0.999995
ENSMUSG00000000711	Rab5b	protein_coding	10	RAB5B, member RAS oncogene family	RAB5B	3013.62	0.0612659	0.0541035	0.0474509	1.14055	0.254058	0.999995
ENSMUSG00000000731	Aire	protein_coding	10	autoimmune regulator (autoimmune polyendocrinopathy candidiasis ectodermal dystrophy)	AIRE	2.27961	-0.131557	-0.00166024	0.0166173	-0.101265	0.91934	0.999995
ENSMUSG00000000732	Icosl	protein_coding	10	icos ligand	ICOSLG	170.848	0.3465	0.182829	0.0738002	2.47487	0.0133286	0.999995
ENSMUSG00000000738	Spg7	protein_coding	8	SPG7, paraplegin matrix AAA peptidase subunit	SPG7	840.219	-0.0789593	-0.0635397	0.0584895	-1.08759	0.276777	0.999995
ENSMUSG00000000740	Rpl13	protein_coding	8	ribosomal protein L13	RPL13	2858.94	0.124816	0.105321	0.0534917	1.97182	0.0486304	0.999995
ENSMUSG00000000743	Chmp1a	protein_coding	8	charged multivesicular body protein 1A	CHMP1A	1212.26	0.084218	0.0700283	0.0553048	1.26653	0.205322	0.999995
ENSMUSG00000000751	Rpa1	protein_coding	11	replication protein A1	RPA1	1361.23	0.0850329	0.0672282	0.060268	1.11386	0.26534	0.999995
ENSMUSG00000000753	Serpinf1	protein_coding	11	serine (or cysteine) peptidase inhibitor, clade F, member 1	SERPINF1	196.205	-0.0598094	-0.0269916	0.0738213	-0.384866	0.700336	0.999995
ENSMUSG00000000759	Tubgcp3	protein_coding	8	tubulin, gamma complex associated protein 3	TUBGCP3	912.878	0.0290235	0.023797	0.0573209	0.412994	0.679611	0.999995
ENSMUSG00000000766	Oprm1	protein_coding	10	opioid receptor, mu 1	OPRM1	316.99	0.128729	0.0851367	0.0701307	1.20737	0.22729	0.999995
ENSMUSG00000000776	Polr3d	protein_coding	14	polymerase (RNA) III (DNA directed) polypeptide D	POLR3D	345.971	-0.0392223	-0.0266909	0.0697779	-0.373689	0.708635	0.999995
ENSMUSG00000000782	Tcf7	protein_coding	11	transcription factor 7, T cell specific	TCF7	23.0826	0.0990514	0.0147605	0.0516925	0.273243	0.784667	0.999995
ENSMUSG00000000787	Ddx3x	protein_coding	X	DEAD/H (Asp-Glu-Ala-Asp/His) box polypeptide 3, X-linked	DDX3X	7590.5	0.0270596	0.0237339	0.0537072	0.424979	0.670852	0.999995
ENSMUSG00000000791	Il12rb1	protein_coding	8	interleukin 12 receptor, beta 1	IL12RB1	27.7929	0.39314	0.0554937	0.0513596	1.07335	0.283113	0.999995
ENSMUSG00000000792	Slc5a5	protein_coding	8	solute carrier family 5 (sodium iodide symporter), member 5	SLC5A5	151.877	0.0464889	0.0196743	0.0701288	0.226722	0.82064	0.999995
ENSMUSG00000000794	Kcnn3	protein_coding	3	potassium intermediate/small conductance calcium-activated channel, subfamily N, member 3	KCNN3	411.841	0.0984355	0.0635756	0.0697823	0.937628	0.348436	0.999995
ENSMUSG00000000804	Usp32	protein_coding	11	ubiquitin specific peptidase 32	USP32	3189.83	-0.0283792	-0.0252838	0.0464764	-0.542702	0.587335	0.999995
ENSMUSG00000000805	Car4	protein_coding	11	carbonic anhydrase 4	CA4	133.229	-0.0247039	-0.0108404	0.0735476	-0.151259	0.879771	0.999995
ENSMUSG00000000811	Txnrd3	protein_coding	6	thioredoxin reductase 3	TXNRD3	217.562	0.00251543	0.00154379	0.0735768	0.0187203	0.985064	0.999995
ENSMUSG00000000826	Dnajc5	protein_coding	2	DnaJ heat shock protein family (Hsp40) member C5	DNAJC5	6526.59	0.0599819	0.0547496	0.0418361	1.30785	0.190925	0.999995
ENSMUSG00000000827	Tpd52l2	protein_coding	2	tumor protein D52-like 2	TPD52L2	1529.13	0.0723228	0.0612817	0.0533767	1.1461	0.251752	0.999995
ENSMUSG00000000838	Fmr1	protein_coding	X	fragile X mental retardation 1	FMR1	1010.9	-0.0896485	-0.0734266	0.0569011	-1.29046	0.196892	0.999995
ENSMUSG00000000861	Bcl11a	protein_coding	11	B cell CLL/lymphoma 11A (zinc finger protein)	BCL11A	167.575	-0.105379	-0.0496237	0.0737634	-0.668725	0.503671	0.999995
ENSMUSG00000000876	Pxmp4	protein_coding	2	peroxisomal membrane protein 4	PXMP4	247.26	0.103146	0.0636304	0.0719108	0.882944	0.377267	0.999995
ENSMUSG00000000881	Dlg3	protein_coding	X	discs large MAGUK scaffold protein 3	DLG3	1057.11	-0.0368598	-0.0292539	0.0606996	-0.476858	0.633463	0.999995
ENSMUSG00000000884	Gnb1l	protein_coding	16	guanine nucleotide binding protein (G protein), beta polypeptide 1-like	GNB1L	63.8939	0.0650045	0.0185249	0.0674905	0.285088	0.775577	0.999995
ENSMUSG00000000901	Mmp11	protein_coding	10	matrix metallopeptidase 11	MMP11	51.8383	-0.262651	-0.0711267	0.0657189	-1.08181	0.279335	0.999995
ENSMUSG00000000902	Smarcb1	protein_coding	10	SWI/SNF related, matrix associated, actin dependent regulator of chromatin, subfamily b, member 1	SMARCB1	684.403	0.0202355	0.0154048	0.0630138	0.244475	0.806863	0.999995
ENSMUSG00000000915	Hip1r	protein_coding	5	huntingtin interacting protein 1 related	HIP1R	1902.34	-0.00341327	-0.002792	0.0562728	-0.0499911	0.96013	0.999995
ENSMUSG00000000916	Nsun5	protein_coding	5	NOL1/NOP2/Sun domain family, member 5	NSUN5	205.391	-0.0412823	-0.0220409	0.0736907	-0.301772	0.762826	0.999995
ENSMUSG00000000934	Top1mt	protein_coding	15	DNA topoisomerase 1, mitochondrial	TOP1MT	248.523	-0.0363541	-0.0221047	0.0721474	-0.306651	0.759109	0.999995
ENSMUSG00000000942	Hoxa4	protein_coding	6	homeobox A4	HOXA4	78.5891	-0.0923946	-0.0343325	0.0694742	-0.437436	0.661795	0.999995
ENSMUSG00000000948	Gm38393	protein_coding	7	predicted gene, 38393		1225.58	-0.062201	-0.0209682	0.0711603	-0.31887	0.749825	0.999995
ENSMUSG00000000957	Mmp14	protein_coding	14	matrix metallopeptidase 14 (membrane-inserted)	MMP14	349.357	-0.0839147	-0.0502294	0.0726002	-0.686129	0.492632	0.999995
ENSMUSG00000000958	Slc7a7	protein_coding	14	solute carrier family 7 (cationic amino acid transporter, y+ system), member 7	SLC7A7	20.9836	0.413942	0.0508455	0.0486885	1.0506	0.293441	0.999995
ENSMUSG00000000959	Oxa1l	protein_coding	14	oxidase assembly 1-like	OXA1L	739.974	0.060338	0.0480769	0.0601278	0.793529	0.427469	0.999995
ENSMUSG00000000976	Heatr6	protein_coding	11	HEAT repeat containing 6	HEATR6	388.885	0.0888503	0.0622481	0.0676801	0.920197	0.35747	0.999995
ENSMUSG00000000982	Ccl3	protein_coding	11	chemokine (C-C motif) ligand 3	CCL3	3.16046	0.918618	0.0183293	0.0208987	0.873499	0.382391	0.999995
ENSMUSG00000000983	Wfdc18	protein_coding	11	WAP four-disulfide core domain 18		13.5595	-0.0072749	-0.000379025	0.0418621	-0.0152617	0.987823	0.999995
ENSMUSG00000001014	Icam4	protein_coding	9	intercellular adhesion molecule 4, Landsteiner-Wiener blood group	ICAM4	5.86259	0.272873	0.0076098	0.0294192	0.377336	0.705924	0.999995
ENSMUSG00000001016	Ilf2	protein_coding	3	interleukin enhancer binding factor 2	ILF2	1349.78	0.0428734	0.0357293	0.0560215	0.632261	0.527216	0.999995
ENSMUSG00000001017	Chtop	protein_coding	3	chromatin target of PRMT1	CHTOP	2187.58	0.0583524	0.0500553	0.0521137	0.956875	0.33863	0.999995
ENSMUSG00000001018	Snapin	protein_coding	3	SNAP-associated protein	SNAPIN	1120.68	0.0455121	0.0349412	0.0624214	0.559784	0.575627	0.999995
ENSMUSG00000001020	S100a4	protein_coding	3	S100 calcium binding protein A4	S100A4	8.0146	-0.196089	-0.00976979	0.0331311	-0.313476	0.753919	0.999995
ENSMUSG00000001025	S100a6	protein_coding	3	S100 calcium binding protein A6 (calcyclin)	S100A6	191.68	-0.015643	-0.00664351	0.0735332	-0.0955928	0.923844	0.999995
ENSMUSG00000001027	Scn4a	protein_coding	11	sodium channel, voltage-gated, type IV, alpha	SCN4A	1.76219	-0.994205	-0.0171406	0.0148882	-0.625776	0.531462	0.999995
ENSMUSG00000001029	Icam2	protein_coding	11	intercellular adhesion molecule 2	ICAM2	43.1166	0.241895	0.0474658	0.0586042	0.805857	0.420325	0.999995
ENSMUSG00000001034	Mapk7	protein_coding	11	mitogen-activated protein kinase 7	MAPK7	244.877	-0.139339	-0.0832323	0.0724898	-1.14818	0.250895	0.999995
ENSMUSG00000001036	Epn2	protein_coding	11	epsin 2	EPN2	2371.53	-0.0352996	-0.0292862	0.0559407	-0.521719	0.601866	0.999995
ENSMUSG00000001039	B9d1	protein_coding	11	B9 protein domain 1	B9D1	159.456	0.175247	0.0904706	0.0738724	1.22503	0.220565	0.999995
ENSMUSG00000001052	Sec24b	protein_coding	3	Sec24 related gene family, member B (S. cerevisiae)	SEC24B	580.669	0.0147955	0.00884901	0.0692748	0.144018	0.885486	0.999995
ENSMUSG00000001053	N4bp3	protein_coding	11	NEDD4 binding protein 3	N4BP3	187.928	-0.0120234	-0.00638333	0.0737419	-0.0870296	0.930648	0.999995
ENSMUSG00000001054	Rmnd5b	protein_coding	11	required for meiotic nuclear division 5 homolog B	RMND5B	432.986	0.183194	0.132708	0.0660638	2.00811	0.0446314	0.999995
ENSMUSG00000001056	Nhp2	protein_coding	11	NHP2 ribonucleoprotein	NHP2	175.34	0.0376981	0.0188556	0.0738935	0.260886	0.79418	0.999995
ENSMUSG00000001062	Vps9d1	protein_coding	8	VPS9 domain containing 1	VPS9D1	509.19	-0.108135	-0.074373	0.0686068	-1.08114	0.279637	0.999995
ENSMUSG00000001065	Zfp276	protein_coding	8	zinc finger protein (C2H2 type) 276	ZNF276	721.778	-0.0257424	-0.0183084	0.0653863	-0.28862	0.772872	0.999995
ENSMUSG00000001076	C1ql4	protein_coding	15	complement component 1, q subcomponent-like 4	C1QL4	6.3878	0.589023	0.0250046	0.0302828	0.848181	0.396337	0.999995
ENSMUSG00000001082	Mfsd10	protein_coding	5	major facilitator superfamily domain containing 10	MFSD10	181.663	-0.0659045	-0.0339878	0.0739098	-0.449703	0.652925	0.999995
ENSMUSG00000001089	Luzp1	protein_coding	4	leucine zipper protein 1	LUZP1	4427.74	0.080426	0.0696095	0.0499822	1.39725	0.162339	0.999995
ENSMUSG00000001098	Kctd10	protein_coding	5	potassium channel tetramerisation domain containing 10	KCTD10	964.011	0.0996276	0.0766928	0.0621829	1.23414	0.217152	0.999995
ENSMUSG00000001100	Poldip2	protein_coding	11	polymerase (DNA-directed), delta interacting protein 2	POLDIP2	1641.67	-0.0298998	-0.0251115	0.0542305	-0.46298	0.643379	0.999995
ENSMUSG00000001105	Ift20	protein_coding	11	intraflagellar transport 20	IFT20	562.948	0.127298	0.09141	0.0666102	1.36967	0.17079	0.999995
ENSMUSG00000001120	Pcbp3	protein_coding	10	poly(rC) binding protein 3	PCBP3	624.384	-0.0673496	-0.0473713	0.0674545	-0.703244	0.481904	0.999995
ENSMUSG00000001123	Lgals9	protein_coding	11	lectin, galactose binding, soluble 9	LGALS9	111.601	-5.76001e-05	0.000123324	0.0732225	-0.000339681	0.999729	0.999995
ENSMUSG00000001127	Araf	protein_coding	X	Araf proto-oncogene, serine/threonine kinase	ARAF	2890.25	-0.0126253	-0.0112346	0.04654	-0.241013	0.809545	0.999995
ENSMUSG00000001128	Cfp	protein_coding	X	complement factor properdin	CFP	71.2532	-0.127766	-0.0408804	0.0687856	-0.588527	0.556178	0.999995
ENSMUSG00000001131	Timp1	protein_coding	X	tissue inhibitor of metalloproteinase 1	TIMP1	5.35004	-0.598798	-0.0163259	0.0275123	-0.770729	0.440867	0.999995
ENSMUSG00000001134	Uxt	protein_coding	X	ubiquitously expressed prefoldin like chaperone	UXT	90.5254	-0.0820173	-0.0336537	0.0720196	-0.441105	0.659137	0.999995
ENSMUSG00000001138	Cnnm3	protein_coding	1	cyclin M3	CNNM3	422.26	-0.0288963	-0.019228	0.070869	-0.261726	0.793533	0.999995
ENSMUSG00000001143	Lman2l	protein_coding	1	lectin, mannose-binding 2-like	LMAN2L	333.863	0.0696607	0.0439047	0.0710611	0.624978	0.531985	0.999995
ENSMUSG00000001150	Mcm3ap	protein_coding	10	minichromosome maintenance complex component 3 associated protein	MCM3AP	848.899	-0.0486092	-0.0383951	0.060084	-0.640074	0.522125	0.999995
ENSMUSG00000001151	Pcnt	protein_coding	10	pericentrin (kendrin)	PCNT	768.787	-0.0561957	-0.044999	0.0591749	-0.759287	0.447681	0.999995
ENSMUSG00000001156	Mxd1	protein_coding	6	MAX dimerization protein 1	MXD1	327.859	-0.130387	-0.0803832	0.0717778	-1.12469	0.260719	0.999995
ENSMUSG00000001157	Gmcl1	protein_coding	6	germ cell-less, spermatogenesis associated 1	GMCL1	605.539	-0.00435392	-0.00358302	0.0641053	-0.0508621	0.959435	0.999995
ENSMUSG00000001158	Snrnp27	protein_coding	6	small nuclear ribonucleoprotein 27 (U4/U6.U5)	SNRNP27	385.96	-0.00640032	-0.00448823	0.0693849	-0.062014	0.950552	0.999995
ENSMUSG00000001166	Oas1c	protein_coding	5	2'-5' oligoadenylate synthetase 1C	OAS1	42.3857	0.0133997	0.00482835	0.0613869	0.0483316	0.961452	0.999995
ENSMUSG00000001173	Ocrl	protein_coding	X	OCRL, inositol polyphosphate-5-phosphatase	OCRL	1024.52	-0.000938243	-0.000869828	0.0565783	-0.0136267	0.989128	0.999995
ENSMUSG00000001175	Calm1	protein_coding	12	calmodulin 1	CALM1	46303.3	0.0394798	0.0349514	0.0472379	0.739287	0.459733	0.999995
ENSMUSG00000001211	Agpat3	protein_coding	10	1-acylglycerol-3-phosphate O-acyltransferase 3	AGPAT3	5199.24	-0.00252262	-0.0022334	0.0465957	-0.0480821	0.961651	0.999995
ENSMUSG00000001225	Slc26a3	protein_coding	12	solute carrier family 26, member 3	SLC26A3	21.4137	-0.612466	-0.0643802	0.0451277	-1.40021	0.161449	0.999995
ENSMUSG00000001227	Sema6b	protein_coding	17	sema domain, transmembrane domain (TM), and cytoplasmic domain, (semaphorin) 6B	SEMA6B	984.828	0.0185678	0.014734	0.0593136	0.249916	0.802652	0.999995
ENSMUSG00000001228	Uhrf1	protein_coding	17	ubiquitin-like, containing PHD and RING finger domains, 1	UHRF1	15.7991	-0.407423	-0.0391401	0.0441532	-0.909425	0.363126	0.999995
ENSMUSG00000001229	Dpp9	protein_coding	17	dipeptidylpeptidase 9	DPP9	622.405	0.0116284	0.00850997	0.0663467	0.126257	0.899528	0.999995
ENSMUSG00000001240	Ramp2	protein_coding	11	receptor (calcitonin) activity modifying protein 2	RAMP2	180.705	0.0356967	0.0178294	0.0739093	0.243805	0.807382	0.999995
ENSMUSG00000001247	Lsr	protein_coding	7	lipolysis stimulated lipoprotein receptor	LSR	87.1355	-0.0372279	-0.0116441	0.0688409	-0.171934	0.863489	0.999995
ENSMUSG00000001248	Gramd1a	protein_coding	7	GRAM domain containing 1A	GRAMD1A	1439.22	-0.0170411	-0.0141355	0.0545164	-0.261829	0.793453	0.999995
ENSMUSG00000001249	Hpn	protein_coding	7	hepsin	HPN	41.8426	-0.162041	-0.0377071	0.0621868	-0.598062	0.549798	0.999995
ENSMUSG00000001260	Gabrg1	protein_coding	5	gamma-aminobutyric acid (GABA) A receptor, subunit gamma 1	GABRG1	927.814	0.118275	0.0864834	0.0651503	1.3364	0.18142	0.999995
ENSMUSG00000001270	Ckb	protein_coding	12	creatine kinase, brain	CKB	26413.1	-0.0718801	-0.0334745	0.0737717	-0.457023	0.647655	0.999995
ENSMUSG00000001280	Sp1	protein_coding	15	trans-acting transcription factor 1	SP1	930.953	-0.0382422	-0.0303588	0.0597076	-0.508999	0.610753	0.999995
ENSMUSG00000001281	Itgb7	protein_coding	15	integrin beta 7	ITGB7	20.6745	-0.161158	-0.0157023	0.0473713	-0.394792	0.692997	0.999995
ENSMUSG00000001285	Myg1	protein_coding	15	melanocyte proliferating gene 1	MYG1	403.215	0.134025	0.089013	0.069617	1.2859	0.198479	0.999995
ENSMUSG00000001288	Rarg	protein_coding	15	retinoic acid receptor, gamma	RARG	141.951	-0.214431	-0.103715	0.073863	-1.39715	0.162368	0.999995
ENSMUSG00000001289	Pfdn5	protein_coding	15	prefoldin 5	PFDN5	1516.3	0.137472	0.115846	0.0538949	2.1481	0.0317056	0.999995
ENSMUSG00000001300	Efnb2	protein_coding	8	ephrin B2	EFNB2	198.603	-0.0634458	-0.034837	0.0735588	-0.473337	0.635973	0.999995
ENSMUSG00000001305	Rrp15	protein_coding	1	ribosomal RNA processing 15 homolog (S. cerevisiae)	RRP15	181.249	-0.122395	-0.0669121	0.0735908	-0.908741	0.363487	0.999995
ENSMUSG00000001313	Rnd2	protein_coding	11	Rho family GTPase 2	RND2	3198.53	0.0302481	0.0253717	0.0548512	0.460548	0.645123	0.999995
ENSMUSG00000001323	Srr	protein_coding	11	serine racemase	SRR	598.975	-0.0300165	-0.0225223	0.0638691	-0.35324	0.723909	0.999995
ENSMUSG00000001333	Sync	protein_coding	4	syncoilin	SYNC	87.5434	-0.0335469	-0.0111295	0.0698114	-0.161297	0.871859	0.999995
ENSMUSG00000001334	Fndc5	protein_coding	4	fibronectin type III domain containing 5	FNDC5	2284.75	-0.0596342	-0.0480387	0.0582538	-0.82688	0.408305	0.999995
ENSMUSG00000001348	Acp5	protein_coding	9	acid phosphatase 5, tartrate resistant	ACP5	4.82658	-1.76024	-0.0408002	0.0228964	-1.78001	0.0750737	0.999995
ENSMUSG00000001366	Fbxo9	protein_coding	9	f-box protein 9	FBXO9	2308.27	0.0771358	0.0654917	0.0529569	1.23635	0.21633	0.999995
ENSMUSG00000001376	Vps50	protein_coding	6	VPS50 EARP/GARPII complex subunit	VPS50	1541.66	0.0881234	0.0680163	0.0621821	1.09166	0.274984	0.999995
ENSMUSG00000001380	Hars	protein_coding	18	histidyl-tRNA synthetase	HARS1	1837.13	0.00413449	0.00341825	0.0560608	0.060907	0.951433	0.999995
ENSMUSG00000001383	Zmat2	protein_coding	18	zinc finger, matrin type 2	ZMAT2	1621.45	0.0602373	0.0519037	0.0510197	1.01748	0.308926	0.999995
ENSMUSG00000001403	Ube2c	protein_coding	2	ubiquitin-conjugating enzyme E2C	UBE2C	3.30995	-0.956125	-0.018757	0.0218304	-0.95619	0.338976	0.999995
ENSMUSG00000001416	Cct3	protein_coding	3	chaperonin containing Tcp1, subunit 3 (gamma)	CCT3	2393.72	0.126871	0.110787	0.0492154	2.25059	0.0244114	0.999995
ENSMUSG00000001418	Glmp	protein_coding	3	glycosylated lysosomal membrane protein	GLMP	507.251	-0.02636	-0.0187796	0.0668901	-0.280857	0.77882	0.999995
ENSMUSG00000001419	Mef2d	protein_coding	3	myocyte enhancer factor 2D	MEF2D	712.177	-0.175286	-0.136043	0.0615995	-2.20865	0.0271991	0.999995
ENSMUSG00000001420	Tmem79	protein_coding	3	transmembrane protein 79	TMEM79	18.7297	0.40401	0.0428479	0.0448372	0.920283	0.357425	0.999995
ENSMUSG00000001424	Snd1	protein_coding	6	staphylococcal nuclease and tudor domain containing 1	SND1	1372.89	-0.0268522	-0.0228464	0.0526658	-0.433793	0.664439	0.999995
ENSMUSG00000001435	Col18a1	protein_coding	10	collagen, type XVIII, alpha 1	COL18A1	121.184	-0.219944	-0.0846644	0.0720006	-1.18121	0.237519	0.999995
ENSMUSG00000001436	Slc19a1	protein_coding	10	solute carrier family 19 (folate transporter), member 1	SLC19A1	213.354	-0.00746927	-0.0038287	0.0732646	-0.057703	0.953985	0.999995
ENSMUSG00000001440	Kpnb1	protein_coding	11	karyopherin (importin) beta 1	KPNB1	4231.73	-0.0153693	-0.0136241	0.046445	-0.294167	0.76863	0.999995
ENSMUSG00000001441	Npepps	protein_coding	11	aminopeptidase puromycin sensitive	NPEPPS	1803.55	-0.00244619	-0.00217517	0.0490145	-0.043631	0.965199	0.999995
ENSMUSG00000001445	Mrpl10	protein_coding	11	mitochondrial ribosomal protein L10	MRPL10	703.506	0.0346934	0.0271157	0.0608652	0.446698	0.655093	0.999995
ENSMUSG00000001467	Cyp51	protein_coding	5	cytochrome P450, family 51	CYP51A1	2626.79	-0.0997798	-0.084137	0.0537515	-1.56521	0.117533	0.999995
ENSMUSG00000001472	Tcf25	protein_coding	8	transcription factor 25 (basic helix-loop-helix)	TCF25	11793.3	-0.00628749	-0.0057283	0.042616	-0.134042	0.893369	0.999995
ENSMUSG00000001473	Tubb6	protein_coding	18	tubulin, beta 6 class V	TUBB6	58.3358	-0.111312	-0.0315867	0.0663012	-0.468107	0.639708	0.999995
ENSMUSG00000001482	Def8	protein_coding	8	differentially expressed in FDCP 8	DEF8	892.008	-0.0153376	-0.0115529	0.0624459	-0.188506	0.85048	0.999995
ENSMUSG00000001493	Meox1	protein_coding	11	mesenchyme homeobox 1	MEOX1	47.3536	0.030665	0.00652194	0.0631766	0.116717	0.907084	0.999995
ENSMUSG00000001504	Irx2	protein_coding	13	Iroquois homeobox 2	IRX2	85.4776	0.0239891	0.00809179	0.0703954	0.118448	0.905713	0.999995
ENSMUSG00000001506	Col1a1	protein_coding	11	collagen, type I, alpha 1	COL1A1	65.9318	-1.08631	-0.0688812	0.0355446	-1.87482	0.060817	0.999995
ENSMUSG00000001507	Itga3	protein_coding	11	integrin alpha 3	ITGA3	733.731	-0.073301	-0.0548598	0.0643249	-0.850363	0.395123	0.999995
ENSMUSG00000001508	Sgca	protein_coding	11	sarcoglycan, alpha (dystrophin-associated glycoprotein)	SGCA	5.36011	-0.632305	-0.0235751	0.0280969	-0.833331	0.404658	0.999995
ENSMUSG00000001510	Dlx3	protein_coding	11	distal-less homeobox 3	DLX3	0.566369	-0.344594	-0.00147682	0.00902758	-0.142881	0.886384	0.999995
ENSMUSG00000001517	Foxm1	protein_coding	6	forkhead box M1	FOXM1	21.5141	-0.508193	-0.0639284	0.0492314	-1.30369	0.192339	0.999995
ENSMUSG00000001520	Nrip2	protein_coding	6	nuclear receptor interacting protein 2	NRIP2	583.474	-0.0114044	-0.00863078	0.0633503	-0.136375	0.891524	0.999995
ENSMUSG00000001521	Tulp3	protein_coding	6	tubby-like protein 3	TULP3	302.544	-0.0546725	-0.0349526	0.070895	-0.49459	0.62089	0.999995
ENSMUSG00000001524	Gtf2h4	protein_coding	17	general transcription factor II H, polypeptide 4	GTF2H4	189.451	-0.00454257	-0.00248425	0.0736921	-0.0331973	0.973517	0.999995
ENSMUSG00000001525	Tubb5	protein_coding	17	tubulin, beta 5 class I	TUBB	7003.44	0.0581661	0.0508872	0.0488846	1.04117	0.297798	0.999995
ENSMUSG00000001542	Ell2	protein_coding	13	elongation factor RNA polymerase II 2	ELL2	562.309	-0.057535	-0.043588	0.0636654	-0.681346	0.495653	0.999995
ENSMUSG00000001552	Jup	protein_coding	11	junction plakoglobin	JUP	706.738	-0.113	-0.0819772	0.0659988	-1.24136	0.214472	0.999995
ENSMUSG00000001555	Fkbp10	protein_coding	11	FK506 binding protein 10	FKBP10	73.8088	0.0254895	0.00724186	0.0698959	0.122741	0.902312	0.999995
ENSMUSG00000001558	Klhl10	protein_coding	11	kelch-like 10	KLHL10	4.90892	0.706896	0.0210064	0.0254162	0.841833	0.399882	0.999995
ENSMUSG00000001566	Mnx1	protein_coding	5	motor neuron and pancreas homeobox 1	MNX1	45.5039	-0.0264734	-0.00565162	0.0597464	-0.0910828	0.927427	0.999995
ENSMUSG00000001569	Nom1	protein_coding	5	nucleolar protein with MIF4G domain 1	NOM1	610.543	-0.0561765	-0.0402026	0.0660892	-0.615272	0.538375	0.999995
ENSMUSG00000001576	Ergic1	protein_coding	17	endoplasmic reticulum-golgi intermediate compartment (ERGIC) 1	ERGIC1	1137.21	-0.011629	-0.00974058	0.0546346	-0.178102	0.858643	0.999995
ENSMUSG00000001588	Acap1	protein_coding	11	ArfGAP with coiled-coil, ankyrin repeat and PH domains 1	ACAP1	3.93669	-0.127262	-0.00353427	0.0230795	-0.136549	0.891388	0.999995
ENSMUSG00000001604	Tcea3	protein_coding	4	transcription elongation factor A (SII), 3	TCEA3	21.4259	0.214575	0.029517	0.0510873	0.581991	0.560573	0.999995
ENSMUSG00000001627	Ifrd1	protein_coding	12	interferon-related developmental regulator 1	IFRD1	532.81	-0.073396	-0.0516179	0.0675043	-0.765006	0.444268	0.999995
ENSMUSG00000001630	Stk38l	protein_coding	6	serine/threonine kinase 38 like	STK38L	774.752	-0.00587667	-0.00535374	0.0640288	-0.0688146	0.945137	0.999995
ENSMUSG00000001632	Brpf1	protein_coding	6	bromodomain and PHD finger containing, 1	BRPF1	533.006	-0.072156	-0.0479529	0.0696608	-0.690999	0.489566	0.999995
ENSMUSG00000001642	Akr1b3	protein_coding	6	aldo-keto reductase family 1, member B3 (aldose reductase)	AKR1B1	535.492	-0.0172414	-0.0130331	0.0650902	-0.195184	0.845249	0.999995
ENSMUSG00000001655	Hoxc13	protein_coding	15	homeobox C13	HOXC13	1.72296	1.99869	0.00496861	0.00657214	0.584188	0.559094	0.999995
ENSMUSG00000001656	Hoxc11	protein_coding	15	homeobox C11	HOXC11	12.5224	1.80921	0.0030783	0.00969837	0.759985	0.447263	0.999995
ENSMUSG00000001657	Hoxc8	protein_coding	15	homeobox C8	HOXC8	1236.69	-0.220698	-0.0802287	0.0714412	-1.14827	0.250856	0.999995
ENSMUSG00000001661	Hoxc6	protein_coding	15	homeobox C6	HOXC6	261.626	-0.115843	-0.0672071	0.072954	-0.921135	0.35698	0.999995
ENSMUSG00000001663	Gstt1	protein_coding	10	glutathione S-transferase, theta 1	GSTT1	214.61	0.202959	0.112163	0.0735293	1.52023	0.128452	0.999995
ENSMUSG00000001665	Gstt3	protein_coding	10	glutathione S-transferase, theta 3		136.106	0.320498	0.127331	0.0720607	1.72786	0.0840137	0.999995
ENSMUSG00000001666	Ddt	protein_coding	10	D-dopachrome tautomerase	DDT	373.652	0.0701115	0.0468488	0.0695617	0.674312	0.500113	0.999995
ENSMUSG00000001672	Marveld3	protein_coding	8	MARVEL (membrane-associating) domain containing 3	MARVELD3	8.38451	0.0159784	0.00061858	0.0341827	0.0264538	0.978895	0.999995
ENSMUSG00000001674	Ddx18	protein_coding	1	DEAD (Asp-Glu-Ala-Asp) box polypeptide 18	DDX18	278.641	-0.0058897	-0.00397503	0.0714001	-0.0519049	0.958604	0.999995
ENSMUSG00000001687	Ubl3	protein_coding	5	ubiquitin-like 3	UBL3	4157.74	0.0300057	0.0272269	0.0427799	0.636686	0.52433	0.999995
ENSMUSG00000001700	Gramd3	protein_coding	18	GRAM domain containing 3	GRAMD2B	403.558	0.192607	0.115506	0.0721885	1.62041	0.105145	0.999995
ENSMUSG00000001707	Eef1e1	protein_coding	13	eukaryotic translation elongation factor 1 epsilon 1	EEF1E1	311.877	0.122979	0.076228	0.0717676	1.06161	0.288413	0.999995
ENSMUSG00000001729	Akt1	protein_coding	12	thymoma viral proto-oncogene 1	AKT1	2607.34	0.0422734	0.0355685	0.0541751	0.65557	0.512101	0.999995
ENSMUSG00000001739	Cldn15	protein_coding	5	claudin 15	CLDN15	9.43589	0.519393	0.0327444	0.0357507	0.902586	0.366746	0.999995
ENSMUSG00000001741	Il16	protein_coding	7	interleukin 16	IL16	59.5001	0.0190801	0.00699469	0.0655614	0.0783109	0.937581	0.999995
ENSMUSG00000001750	Tcirg1	protein_coding	19	T cell, immune regulator 1, ATPase, H+ transporting, lysosomal V0 protein A3	TCIRG1	381.549	-0.173672	-0.117957	0.0690098	-1.70839	0.0875637	0.999995
ENSMUSG00000001751	Naglu	protein_coding	11	alpha-N-acetylglucosaminidase (Sanfilippo disease IIIB)	NAGLU	177.075	0.0779312	0.0404587	0.0738961	0.538418	0.590289	0.999995
ENSMUSG00000001755	Coasy	protein_coding	11	Coenzyme A synthase	COASY	429.118	0.0162323	0.0113978	0.0676118	0.168537	0.86616	0.999995
ENSMUSG00000001763	Tspan33	protein_coding	6	tetraspanin 33	TSPAN33	284.407	-0.0847561	-0.0528996	0.0716584	-0.736215	0.4616	0.999995
ENSMUSG00000001767	Crnkl1	protein_coding	2	crooked neck pre-mRNA splicing factor 1	CRNKL1	443.002	0.0724597	0.0501545	0.0682738	0.733956	0.462975	0.999995
ENSMUSG00000001768	Rin2	protein_coding	2	Ras and Rab interactor 2	RIN2	728.236	-0.0651209	-0.0467152	0.0686298	-0.650521	0.515356	0.999995
ENSMUSG00000001773	Folh1	protein_coding	7	folate hydrolase 1	FOLH1	816.657	0.161549	0.0357509	0.068083	0.724127	0.468988	0.999995
ENSMUSG00000001774	Chordc1	protein_coding	9	cysteine and histidine-rich domain (CHORD)-containing, zinc-binding protein 1	CHORDC1	1620.95	0.0671828	0.0538987	0.0588702	0.915629	0.359862	0.999995
ENSMUSG00000001783	Rtcb	protein_coding	10	RNA 2',3'-cyclic phosphate and 5'-OH ligase	RTCB	2432.76	0.0618735	0.0525126	0.0524983	1.00411	0.315324	0.999995
ENSMUSG00000001785	Pwp1	protein_coding	10	PWP1 homolog, endonuclein	PWP1	367.675	0.0432149	0.027727	0.0719916	0.368119	0.712784	0.999995
ENSMUSG00000001786	Fbxo7	protein_coding	10	F-box protein 7	FBXO7	848.41	0.054735	0.0434619	0.0598715	0.72515	0.46836	0.999995
ENSMUSG00000001794	Capns1	protein_coding	7	calpain, small subunit 1	CAPNS1	2430.91	-0.0318679	-0.00615314	0.0675655	-0.14021	0.888494	0.999995
ENSMUSG00000001802	Lrp3	protein_coding	7	low density lipoprotein receptor-related protein 3	LRP3	1114.79	-0.0495051	-0.0384281	0.0624223	-0.60886	0.542617	0.999995
ENSMUSG00000001815	Evx2	protein_coding	2	even-skipped homeobox 2	EVX2	10.3581	0.722763	0.0442633	0.0356516	1.24776	0.212119	0.999995
ENSMUSG00000001827	Folr1	protein_coding	7	folate receptor 1 (adult)	FOLR1	7.60177	-0.355521	-0.018287	0.0298243	-0.501564	0.615974	0.999995
ENSMUSG00000001829	Clpb	protein_coding	7	ClpB caseinolytic peptidase B	CLPB	1180.52	0.0328479	0.0260728	0.0599023	0.434799	0.663708	0.999995
ENSMUSG00000001833	Septin7	protein_coding	9	septin 7	SEPTIN7	7682.82	0.092277	0.0824113	0.0455836	1.80894	0.0704601	0.999995
ENSMUSG00000001844	Zdhhc4	protein_coding	5	zinc finger, DHHC domain containing 4	ZDHHC4	376.741	-0.00705891	-0.00479682	0.0696967	-0.0674972	0.946186	0.999995
ENSMUSG00000001847	Rac1	protein_coding	5	Rac family small GTPase 1	RAC1	3983.47	0.0607897	0.0543947	0.0454318	1.19674	0.231408	0.999995
ENSMUSG00000001855	Nup214	protein_coding	2	nucleoporin 214	NUP214	515.535	-0.0873366	-0.0624843	0.0667887	-0.933795	0.35041	0.999995
ENSMUSG00000001864	Aif1l	protein_coding	2	allograft inflammatory factor 1-like	AIF1L	433.225	0.0709305	0.0512753	0.066159	0.77508	0.438292	0.999995
ENSMUSG00000001870	Ltbp1	protein_coding	17	latent transforming growth factor beta binding protein 1	LTBP1	318.672	-0.0511613	-0.0315957	0.0710324	-0.459574	0.645822	0.999995
ENSMUSG00000001891	Ugp2	protein_coding	11	UDP-glucose pyrophosphorylase 2	UGP2	1757	0.0310717	0.0249244	0.058465	0.428309	0.668426	0.999995
ENSMUSG00000001901	Kcnh6	protein_coding	11	potassium voltage-gated channel, subfamily H (eag-related), member 6	KCNH6	58.5572	0.00862787	0.00317217	0.0670268	0.0372209	0.970309	0.999995
ENSMUSG00000001909	Trmt1	protein_coding	8	tRNA methyltransferase 1	TRMT1	780.343	-0.00128836	-0.000976675	0.06059	-0.0167207	0.986659	0.999995
ENSMUSG00000001910	Nacc1	protein_coding	8	nucleus accumbens associated 1, BEN and BTB (POZ) domain containing	NACC1	1593.43	-0.00182402	-0.00149638	0.0553879	-0.0273688	0.978166	0.999995
ENSMUSG00000001911	Nfix	protein_coding	8	nuclear factor I/X	NFIX	647.754	-0.158404	-0.109791	0.068246	-1.60593	0.108289	0.999995
ENSMUSG00000001918	Slc1a5	protein_coding	7	solute carrier family 1 (neutral amino acid transporter), member 5	SLC1A5	57.9354	-1.08074	-0.0447086	0.0267848	-1.36352	0.172718	0.999995
ENSMUSG00000001924	Uba1	protein_coding	X	ubiquitin-like modifier activating enzyme 1	UBA1	5518.58	0.0258552	0.0228102	0.0476216	0.479078	0.631883	0.999995
ENSMUSG00000001930	Vwf	protein_coding	6	Von Willebrand factor	VWF	231.177	-0.0164593	-0.00665336	0.0578451	-0.0536782	0.957192	0.999995
ENSMUSG00000001942	Siae	protein_coding	9	sialic acid acetylesterase	SIAE	499.618	0.110044	0.0753881	0.0682085	1.11741	0.26382	0.999995
ENSMUSG00000001943	Vsig2	protein_coding	9	V-set and immunoglobulin domain containing 2	VSIG2	23.9617	-0.187844	-0.0235344	0.0489255	-0.480175	0.631103	0.999995
ENSMUSG00000001946	Esam	protein_coding	9	endothelial cell-specific adhesion molecule	ESAM	260.895	0.0753881	0.043003	0.0732381	0.58407	0.559173	0.999995
ENSMUSG00000001948	Spa17	protein_coding	9	sperm autoantigenic protein 17	SPA17	38.0752	0.317583	0.0617107	0.0590899	1.07122	0.284072	0.999995
ENSMUSG00000001962	Fam50a	protein_coding	X	family with sequence similarity 50, member A	FAM50A	264.444	-0.176894	-0.0945916	0.07368	-1.29509	0.195289	0.999995
ENSMUSG00000001964	Emd	protein_coding	X	emerin	EMD	286.595	0.0751604	0.0474215	0.0712981	0.666043	0.505384	0.999995
ENSMUSG00000001983	Taco1	protein_coding	11	translational activator of mitochondrially encoded cytochrome c oxidase I	TACO1	178.451	0.00605022	0.00279132	0.0738864	0.0420338	0.966472	0.999995
ENSMUSG00000001985	Grik3	protein_coding	4	glutamate receptor, ionotropic, kainate 3	GRIK3	532.452	-0.0833894	-0.0494828	0.0735384	-0.623941	0.532666	0.999995
ENSMUSG00000001986	Gria3	protein_coding	X	glutamate receptor, ionotropic, AMPA3 (alpha 3)	GRIA3	1898.8	0.0375121	0.031622	0.0538677	0.586604	0.55747	0.999995
ENSMUSG00000001988	Npas1	protein_coding	7	neuronal PAS domain protein 1	NPAS1	65.9879	-0.285082	-0.0837067	0.0675624	-1.2517	0.210678	0.999995
ENSMUSG00000001995	Sipa1l2	protein_coding	8	signal-induced proliferation-associated 1 like 2	SIPA1L2	1753.16	-0.117777	-0.0981745	0.0554017	-1.76643	0.0773232	0.999995
ENSMUSG00000001998	Ap4e1	protein_coding	2	adaptor-related protein complex AP-4, epsilon 1	AP4E1	357.352	-0.152503	-0.102767	0.0693109	-1.48181	0.13839	0.999995
ENSMUSG00000001999	Blvra	protein_coding	2	biliverdin reductase A	BLVRA	380.543	0.0314505	0.0193431	0.0714527	0.276365	0.782268	0.999995
ENSMUSG00000002006	Pdzd4	protein_coding	X	PDZ domain containing 4	PDZD4	1251.24	0.0589071	0.0452759	0.062349	0.72611	0.467771	0.999995
ENSMUSG00000002007	Srpk3	protein_coding	X	serine/arginine-rich protein specific kinase 3	SRPK3	116.207	-0.14037	-0.0510559	0.0710089	-0.713752	0.475381	0.999995
ENSMUSG00000002010	Idh3g	protein_coding	X	isocitrate dehydrogenase 3 (NAD+), gamma	IDH3G	2146.85	0.0524528	0.0447827	0.0521448	0.859409	0.390115	0.999995
ENSMUSG00000002012	Pnck	protein_coding	X	pregnancy upregulated non-ubiquitously expressed CaM kinase	PNCK	983.673	0.0944537	0.076476	0.0580245	1.31806	0.187482	0.999995
ENSMUSG00000002014	Ssr4	protein_coding	X	signal sequence receptor, delta	SSR4	485.861	-0.00240451	-0.00171758	0.0655848	-0.026784	0.978632	0.999995
ENSMUSG00000002015	Bcap31	protein_coding	X	B cell receptor associated protein 31	BCAP31	1251.32	-0.0422797	-0.0355218	0.0549355	-0.642239	0.520718	0.999995
ENSMUSG00000002017	Fam98a	protein_coding	17	family with sequence similarity 98, member A	FAM98A	908.975	0.0268178	0.0207345	0.0599367	0.354623	0.722872	0.999995
ENSMUSG00000002020	Ltbp2	protein_coding	12	latent transforming growth factor beta binding protein 2	LTBP2	3.34236	-0.676887	-0.00489131	0.0202721	-0.615782	0.538038	0.999995
ENSMUSG00000002028	Kmt2a	protein_coding	9	lysine (K)-specific methyltransferase 2A	KMT2A	1155.04	-0.130561	-0.100706	0.0620998	-1.62119	0.104976	0.999995
ENSMUSG00000002031	Ift46	protein_coding	9	intraflagellar transport 46	IFT46	711.57	-0.00813664	-0.00631233	0.0628197	-0.0988829	0.921231	0.999995
ENSMUSG00000002032	Tmem25	protein_coding	9	transmembrane protein 25	TMEM25	1019.87	0.00528511	0.0044872	0.0603752	0.0690152	0.944977	0.999995
ENSMUSG00000002043	Trappc6a	protein_coding	7	trafficking protein particle complex 6A	TRAPPC6A	92.364	-0.0875011	-0.0289763	0.0698353	-0.421165	0.673635	0.999995
ENSMUSG00000002052	Supt6	protein_coding	11	SPT6, histone chaperone and transcription elongation factor	SUPT6H	2551.07	-0.0156707	-0.0123511	0.0600825	-0.206365	0.836506	0.999995
ENSMUSG00000002055	Spag5	protein_coding	11	sperm associated antigen 5	SPAG5	463.288	-0.0888915	-0.0648925	0.0656213	-0.988858	0.322733	0.999995
ENSMUSG00000002058	Unc119	protein_coding	11	unc-119 lipid binding chaperone	UNC119	446.713	0.147923	0.103257	0.0679355	1.51752	0.129137	0.999995
ENSMUSG00000002059	Rab34	protein_coding	11	RAB34, member RAS oncogene family	RAB34	240.777	0.101964	0.0599232	0.0728215	0.819931	0.412255	0.999995
ENSMUSG00000002064	Sdf2	protein_coding	11	stromal cell derived factor 2	SDF2	693.419	0.129526	0.0986358	0.0630068	1.56524	0.117526	0.999995
ENSMUSG00000002068	Ccne1	protein_coding	7	cyclin E1	CCNE1	240.476	0.014232	0.00840044	0.0722911	0.118935	0.905327	0.999995
ENSMUSG00000002076	Hsf2bp	protein_coding	17	heat shock transcription factor 2 binding protein	HSF2BP	9.12652	0.606168	0.0360196	0.0352868	1.03641	0.300012	0.999995
ENSMUSG00000002083	Bbc3	protein_coding	7	BCL2 binding component 3	BBC3	36.497	-0.514089	-0.101214	0.0589478	-1.72	0.0854317	0.999995
ENSMUSG00000002100	Mybpc3	protein_coding	2	myosin binding protein C, cardiac	MYBPC3	63.5572	0.449703	0.11356	0.0644425	1.77719	0.0755365	0.999995
ENSMUSG00000002102	Psmc3	protein_coding	2	proteasome (prosome, macropain) 26S subunit, ATPase 3	PSMC3	2422.01	-0.0131829	-0.0109268	0.0556606	-0.196339	0.844345	0.999995
ENSMUSG00000002103	Acp2	protein_coding	2	acid phosphatase 2, lysosomal	ACP2	1333.04	-0.00929204	-0.00782132	0.0538711	-0.145291	0.884481	0.999995
ENSMUSG00000002104	Rapsn	protein_coding	2	receptor-associated protein of the synapse	RAPSN	13.376	-0.162024	-0.0133145	0.0416785	-0.337588	0.735673	0.999995
ENSMUSG00000002105	Slc39a13	protein_coding	2	solute carrier family 39 (metal ion transporter), member 13	SLC39A13	526.989	0.0913866	0.066616	0.0657954	1.01089	0.312068	0.999995
ENSMUSG00000002107	Celf2	protein_coding	2	CUGBP, Elav-like family member 2	CELF2	945.279	-0.0849388	-0.0624701	0.065189	-0.958487	0.337817	0.999995
ENSMUSG00000002108	Nr1h3	protein_coding	2	nuclear receptor subfamily 1, group H, member 3	NR1H3	98.8811	-0.0292653	-0.0127701	0.0723539	-0.160846	0.872214	0.999995
ENSMUSG00000002109	Ddb2	protein_coding	2	damage specific DNA binding protein 2	DDB2	153.164	-0.000821637	-0.000160709	0.0739062	-0.00548573	0.995623	0.999995
ENSMUSG00000002111	Spi1	protein_coding	2	spleen focus forming virus (SFFV) proviral integration oncogene	SPI1	38.5265	0.162085	0.031812	0.0587137	0.541777	0.587972	0.999995
ENSMUSG00000002129	Sf3a1	protein_coding	11	splicing factor 3a, subunit 1	SF3A1	817.678	-0.0762975	-0.0592625	0.0614281	-0.966354	0.333867	0.999995
ENSMUSG00000002147	Stat6	protein_coding	10	signal transducer and activator of transcription 6	STAT6	170.349	-0.00600783	-0.00072921	0.0738602	-0.03913	0.968787	0.999995
ENSMUSG00000002190	Clgn	protein_coding	8	calmegin	CLGN	707.782	-0.14512	-0.10624	0.0659173	-1.59851	0.10993	0.999995
ENSMUSG00000002204	Napsa	protein_coding	7	napsin A aspartic peptidase	NAPSA	0.851474	0.916867	0.00591079	0.0098691	0.407285	0.683799	0.999995
ENSMUSG00000002205	Vrk3	protein_coding	7	vaccinia related kinase 3	VRK3	278.703	-0.0569334	-0.0363768	0.0709765	-0.512933	0.607998	0.999995
ENSMUSG00000002210	Smg9	protein_coding	7	smg-9 homolog, nonsense mediated mRNA decay factor (C. elegans)	SMG9	383.207	0.031128	0.0193346	0.0717876	0.268422	0.788375	0.999995
ENSMUSG00000002221	Paxip1	protein_coding	5	PAX interacting (with transcription-activation domain) protein 1	PAXIP1	522.578	-0.0634186	-0.045947	0.0657485	-0.702549	0.482337	0.999995
ENSMUSG00000002222	Rmnd5a	protein_coding	6	required for meiotic nuclear division 5 homolog A	RMND5A	3319.58	0.0544657	0.0474577	0.0496524	0.954759	0.3397	0.999995
ENSMUSG00000002227	Mov10	protein_coding	3	Mov10 RISC complex RNA helicase	MOV10	54.0354	-0.102096	-0.0279512	0.0653151	-0.415495	0.67778	0.999995
ENSMUSG00000002228	Ppm1j	protein_coding	3	protein phosphatase 1J	PPM1J	33.2831	0.197051	0.0370779	0.0544923	0.584895	0.558618	0.999995
ENSMUSG00000002233	Rhoc	protein_coding	3	ras homolog family member C	RHOC	194.173	-0.117186	-0.0605317	0.0738213	-0.832903	0.4049	0.999995
ENSMUSG00000002249	Tead3	protein_coding	17	TEA domain family member 3	TEAD3	49.8424	-0.482876	-0.123952	0.064647	-1.91464	0.0555378	0.999995
ENSMUSG00000002257	Def6	protein_coding	17	differentially expressed in FDCP 6	DEF6	67.2338	0.0492066	0.0144233	0.0683537	0.222917	0.8236	0.999995
ENSMUSG00000002265	Peg3	protein_coding	7	paternally expressed 3	PEG3	16163.6	0.246346	0.0603856	0.061179	0.88353	0.37695	0.999995
ENSMUSG00000002266	Zim1	protein_coding	7	zinc finger, imprinted 1		122.095	-0.436877	-0.114049	0.0660132	-1.81723	0.0691815	0.999995
ENSMUSG00000002274	Metrn	protein_coding	17	meteorin, glial cell differentiation regulator	METRN	1858.58	-0.0149706	-0.0117924	0.0596491	-0.199594	0.841798	0.999995
ENSMUSG00000002279	Lmf1	protein_coding	17	lipase maturation factor 1	LMF1	389.27	0.094605	0.0639071	0.0692336	0.922426	0.356306	0.999995
ENSMUSG00000002280	Ciao3	protein_coding	17	cytosolic iron-sulfur assembly component 3	CIAO3	425.528	-0.00558715	-0.00392992	0.0683864	-0.0563475	0.955065	0.999995
ENSMUSG00000002289	Angptl4	protein_coding	17	angiopoietin-like 4	ANGPTL4	32.1707	-0.430097	-0.0788812	0.0545954	-1.26733	0.205038	0.999995
ENSMUSG00000002297	Dbf4	protein_coding	5	DBF4 zinc finger	DBF4	43.6012	0.117332	0.0250335	0.0606525	0.414441	0.678551	0.999995
ENSMUSG00000002307	Daxx	protein_coding	17	Fas death domain-associated protein	DAXX	327.176	-0.014459	-0.00949954	0.0701795	-0.135334	0.892348	0.999995
ENSMUSG00000002308	Cd320	protein_coding	17	CD320 antigen	CD320	235.827	0.172655	0.102109	0.0726606	1.40571	0.159811	0.999995
ENSMUSG00000002319	Ipo4	protein_coding	14	importin 4	IPO4	521.225	-0.0597743	-0.0410201	0.0684849	-0.600522	0.548158	0.999995
ENSMUSG00000002320	Tm9sf1	protein_coding	14	transmembrane 9 superfamily member 1	TM9SF1	487.845	0.0196533	0.0139888	0.0678771	0.202068	0.839863	0.999995
ENSMUSG00000002324	Rec8	protein_coding	14	REC8 meiotic recombination protein	REC8	37.7452	-0.169216	-0.00979836	0.0204963	-0.161701	0.871542	0.999995
ENSMUSG00000002325	Irf9	protein_coding	14	interferon regulatory factor 9	IRF9	207.57	0.0898274	0.041638	0.0738366	0.580579	0.561524	0.999995
ENSMUSG00000002326	Gmpr2	protein_coding	14	guanosine monophosphate reductase 2	GMPR2	248.483	0.126618	0.0760443	0.0722384	1.06178	0.288337	0.999995
ENSMUSG00000002329	Mdp1	protein_coding	14	magnesium-dependent phosphatase 1	MDP1	533.699	0.106482	0.0758598	0.0668712	1.13531	0.256247	0.999995
ENSMUSG00000002332	Dhrs1	protein_coding	14	dehydrogenase/reductase (SDR family) member 1	DHRS1	1120.57	-0.0101683	-0.0080621	0.0594249	-0.13643	0.891481	0.999995
ENSMUSG00000002341	Ncan	protein_coding	8	neurocan	NCAN	1425.43	0.0653142	0.0462974	0.0657194	0.724315	0.468872	0.999995
ENSMUSG00000002342	Tmem161a	protein_coding	8	transmembrane protein 161A	TMEM161A	503.967	0.0513968	0.0343486	0.0691273	0.50335	0.614718	0.999995
ENSMUSG00000002343	Armc6	protein_coding	8	armadillo repeat containing 6	ARMC6	416.063	0.0925999	0.0646159	0.0678439	0.953255	0.340461	0.999995
ENSMUSG00000002345	Borcs8	protein_coding	8	BLOC-1 related complex subunit 8	BORCS8	326.27	0.0454265	0.0294462	0.0705814	0.417327	0.676439	0.999995
ENSMUSG00000002346	Slc25a42	protein_coding	8	solute carrier family 25, member 42	SLC25A42	181.234	-0.124916	-0.0638524	0.0739077	-0.854615	0.392764	0.999995
ENSMUSG00000002365	Snx9	protein_coding	17	sorting nexin 9	SNX9	430.905	-0.0210255	-0.0143143	0.0682715	-0.21298	0.831343	0.999995
ENSMUSG00000002372	Ranbp3	protein_coding	17	RAN binding protein 3	RANBP3	1246.19	0.0590097	0.048248	0.0571408	0.843883	0.398735	0.999995
ENSMUSG00000002379	Ndufa11	protein_coding	17	NADH:ubiquinone oxidoreductase subunit A11	NDUFA11	1087.19	0.0284254	0.0226994	0.0594862	0.380733	0.703401	0.999995
ENSMUSG00000002393	Nr2f6	protein_coding	8	nuclear receptor subfamily 2, group F, member 6	NR2F6	454.037	0.0860036	0.0600759	0.0676721	0.890991	0.372934	0.999995
ENSMUSG00000002395	Use1	protein_coding	8	unconventional SNARE in the ER 1 homolog (S. cerevisiae)	USE1	809.13	0.0397653	0.0298474	0.0639859	0.466284	0.641012	0.999995
ENSMUSG00000002396	Ocel1	protein_coding	8	occludin/ELL domain containing 1	OCEL1	166.983	0.078847	0.040497	0.0738966	0.544603	0.586026	0.999995
ENSMUSG00000002409	Dyrk1b	protein_coding	7	dual-specificity tyrosine-(Y)-phosphorylation regulated kinase 1b	DYRK1B	237.039	-0.284456	-0.15413	0.0736563	-2.08971	0.0366435	0.999995
ENSMUSG00000002413	Braf	protein_coding	6	Braf transforming gene	BRAF	2856.45	-0.0843711	-0.0717045	0.0527802	-1.35878	0.174215	0.999995
ENSMUSG00000002416	Ndufb2	protein_coding	6	NADH:ubiquinone oxidoreductase subunit B2	NDUFB2	1119.83	0.0218724	0.0177084	0.056631	0.3172	0.751092	0.999995
ENSMUSG00000002428	Hltf	protein_coding	3	helicase-like transcription factor	HLTF	797.373	-0.0101665	-0.00836925	0.0638178	-0.119834	0.904614	0.999995
ENSMUSG00000002455	Prpf6	protein_coding	2	pre-mRNA splicing factor 6	PRPF6	1272.68	0.019933	0.0168253	0.052927	0.319748	0.749159	0.999995
ENSMUSG00000002458	Rgs19	protein_coding	2	regulator of G-protein signaling 19	RGS19	141.273	0.0684321	0.0311155	0.0735961	0.42194	0.673069	0.999995
ENSMUSG00000002459	Rgs20	protein_coding	1	regulator of G-protein signaling 20	RGS20	78.3333	-0.114775	-0.036664	0.068169	-0.515672	0.606084	0.999995
ENSMUSG00000002475	Abhd3	protein_coding	18	abhydrolase domain containing 3	ABHD3	1246.05	-0.0249072	-0.0200508	0.0591699	-0.336601	0.736418	0.999995
ENSMUSG00000002477	Snrpd1	protein_coding	18	small nuclear ribonucleoprotein D1	SNRPD1	392.317	0.146635	0.0927194	0.0717801	1.26489	0.205911	0.999995
ENSMUSG00000002486	Tchp	protein_coding	5	trichoplein, keratin filament binding	TCHP	184.437	0.0915933	0.047903	0.073827	0.650185	0.515572	0.999995
ENSMUSG00000002489	Tiam1	protein_coding	16	T cell lymphoma invasion and metastasis 1	TIAM1	904.651	-0.19257	-0.143353	0.0645956	-2.21464	0.026785	0.999995
ENSMUSG00000002496	Tsc2	protein_coding	17	TSC complex subunit 2	TSC2	1164.98	-0.0335882	-0.0251034	0.0647165	-0.384858	0.700343	0.999995
ENSMUSG00000002500	Rpl3l	protein_coding	17	ribosomal protein L3-like	RPL3L	5.64164	-0.620316	-0.0261755	0.0288568	-0.841803	0.399898	0.999995
ENSMUSG00000002504	Slc9a3r2	protein_coding	17	solute carrier family 9 (sodium/hydrogen exchanger), member 3 regulator 2	SLC9A3R2	1105.53	-0.0133248	-0.0105774	0.0601373	-0.175195	0.860926	0.999995
ENSMUSG00000002524	Puf60	protein_coding	15	poly-U binding splicing factor 60	PUF60	2429.29	0.065036	0.0561652	0.050737	1.10698	0.268304	0.999995
ENSMUSG00000002546	Golga2	protein_coding	2	golgi autoantigen, golgin subfamily a, 2	GOLGA2	1809.64	-0.0585046	-0.0489005	0.0547773	-0.892543	0.372102	0.999995
ENSMUSG00000002550	Uck1	protein_coding	2	uridine-cytidine kinase 1	UCK1	578.716	0.173737	0.12319	0.0671468	1.83438	0.066597	0.999995
ENSMUSG00000002578	Ikzf4	protein_coding	10	IKAROS family zinc finger 4	IKZF4	51.2292	-0.251459	-0.0664931	0.0656277	-1.03157	0.302273	0.999995
ENSMUSG00000002580	Mien1	protein_coding	11	migration and invasion enhancer 1	MIEN1	650.56	0.0906639	0.0670064	0.0647113	1.03903	0.298792	0.999995
ENSMUSG00000002602	Axl	protein_coding	7	AXL receptor tyrosine kinase	AXL	1324.47	-0.0099258	-0.007892	0.0596901	-0.13218	0.894842	0.999995
ENSMUSG00000002603	Tgfb1	protein_coding	7	transforming growth factor, beta 1	TGFB1	25.4775	-0.204864	-0.0322067	0.0535786	-0.593967	0.552534	0.999995
ENSMUSG00000002608	Ccdc97	protein_coding	7	coiled-coil domain containing 97	CCDC97	305.883	-0.164792	-0.0990339	0.0723875	-1.36786	0.171355	0.999995
ENSMUSG00000002617	Zfp40	protein_coding	17	zinc finger protein 40		314.64	0.0877625	0.0542933	0.0708816	0.794402	0.426961	0.999995
ENSMUSG00000002625	Akap8l	protein_coding	17	A kinase (PRKA) anchor protein 8-like	AKAP8L	1338.28	-0.168488	-0.129381	0.0624007	-2.07342	0.0381331	0.999995
ENSMUSG00000002633	Shh	protein_coding	5	sonic hedgehog	SHH	58.9405	-0.239919	-0.0690883	0.066956	-1.03128	0.30241	0.999995
ENSMUSG00000002635	Pdcd2l	protein_coding	7	programmed cell death 2-like	PDCD2L	199.445	0.0800598	0.0428176	0.0738708	0.56014	0.575384	0.999995
ENSMUSG00000002658	Gtf2f1	protein_coding	17	general transcription factor IIF, polypeptide 1	GTF2F1	1005.74	0.0749922	0.0580409	0.0619923	0.934236	0.350182	0.999995
ENSMUSG00000002660	Clpp	protein_coding	17	caseinolytic mitochondrial matrix peptidase proteolytic subunit	CLPP	579.69	-0.0543352	-0.0406999	0.06405	-0.635813	0.524898	0.999995
ENSMUSG00000002661	Alkbh7	protein_coding	17	alkB homolog 7	ALKBH7	201.118	0.00559912	0.00290096	0.073869	0.0392036	0.968728	0.999995
ENSMUSG00000002668	Dennd1c	protein_coding	17	DENN/MADD domain containing 1C	DENND1C	18.5789	-0.519674	-0.0568091	0.0474991	-1.26259	0.206738	0.999995
ENSMUSG00000002679	Med6	protein_coding	12	mediator complex subunit 6	MED6	242.08	0.115285	0.0675801	0.0727459	0.932609	0.351022	0.999995
ENSMUSG00000002688	Prkd1	protein_coding	12	protein kinase D1	PRKD1	164.106	-0.100287	-0.0520397	0.0739022	-0.689642	0.49042	0.999995
ENSMUSG00000002699	Lcp2	protein_coding	11	lymphocyte cytosolic protein 2	LCP2	40.0148	0.0439734	0.00899334	0.0609635	0.156733	0.875456	0.999995
ENSMUSG00000002718	Cse1l	protein_coding	2	chromosome segregation 1-like (S. cerevisiae)	CSE1L	1290.48	0.0520498	0.0426284	0.0571849	0.743445	0.457212	0.999995
ENSMUSG00000002728	Naa20	protein_coding	2	N(alpha)-acetyltransferase 20, NatB catalytic subunit	NAA20	781.112	0.023677	0.0188762	0.0593802	0.318084	0.750421	0.999995
ENSMUSG00000002731	Prkra	protein_coding	2	protein kinase, interferon inducible double stranded RNA dependent activator	PRKRA	418.397	0.0200616	0.0137955	0.0685281	0.201217	0.840529	0.999995
ENSMUSG00000002732	Fkbp7	protein_coding	2	FK506 binding protein 7	FKBP7	41.2025	0.0256087	0.00566235	0.0613096	0.0920857	0.92663	0.999995
ENSMUSG00000002733	Plekha3	protein_coding	2	pleckstrin homology domain-containing, family A (phosphoinositide binding specific) member 3	PLEKHA3	823.6	0.0622182	0.0493936	0.0593916	0.835591	0.403385	0.999995
ENSMUSG00000002741	Ykt6	protein_coding	11	YKT6 v-SNARE homolog (S. cerevisiae)	YKT6	1081.57	0.0770711	0.0629331	0.0569929	1.10666	0.268439	0.999995
ENSMUSG00000002748	Baz1b	protein_coding	5	bromodomain adjacent to zinc finger domain, 1B	BAZ1B	2614.14	0.0218064	0.0188961	0.050283	0.375764	0.707092	0.999995
ENSMUSG00000002763	Pex6	protein_coding	17	peroxisomal biogenesis factor 6	PEX6	559.925	-0.0605206	-0.0462293	0.0628911	-0.733878	0.463023	0.999995
ENSMUSG00000002767	Mrpl2	protein_coding	17	mitochondrial ribosomal protein L2	MRPL2	418.218	0.0664164	0.0459366	0.068277	0.672646	0.501172	0.999995
ENSMUSG00000002768	Mea1	protein_coding	17	male enhanced antigen 1	MEA1	845.33	0.124177	0.0996959	0.0589106	1.69041	0.0909499	0.999995
ENSMUSG00000002769	Gnmt	protein_coding	17	glycine N-methyltransferase	GNMT	17.4442	0.0731247	0.0078343	0.0455009	0.170313	0.864764	0.999995
ENSMUSG00000002771	Grin2d	protein_coding	7	glutamate receptor, ionotropic, NMDA2D (epsilon 4)	GRIN2D	170.528	0.032792	0.0165356	0.07389	0.227376	0.820131	0.999995
ENSMUSG00000002778	Kdelr1	protein_coding	7	KDEL (Lys-Asp-Glu-Leu) endoplasmic reticulum protein retention receptor 1	KDELR1	479.161	0.0697795	0.0512095	0.0653156	0.78421	0.432917	0.999995
ENSMUSG00000002781	Tmem143	protein_coding	7	transmembrane protein 143	TMEM143	428.258	-0.131491	-0.0913043	0.0681163	-1.33961	0.180371	0.999995
ENSMUSG00000002791	Pdxk-ps	transcribed_unprocessed_pseudogene	17	pyridoxal (pyridoxine, vitamin B6) kinase, pseudogene		5.99429	-0.128019	-0.000450596	0.0281706	-0.169707	0.86524	0.999995
ENSMUSG00000002797	Ggct	protein_coding	6	gamma-glutamyl cyclotransferase	GGCT	318.945	-0.14965	-0.097003	0.0705563	-1.376	0.168822	0.999995
ENSMUSG00000002799	Jag2	protein_coding	12	jagged 2	JAG2	542.855	-0.0513389	-0.037878	0.0658494	-0.566796	0.570853	0.999995
ENSMUSG00000002803	Btbd6	protein_coding	12	BTB (POZ) domain containing 6	BTBD6	449.435	0.0170748	0.0121111	0.0669816	0.181347	0.856095	0.999995
ENSMUSG00000002804	Nudt14	protein_coding	12	nudix (nucleoside diphosphate linked moiety X)-type motif 14	NUDT14	94.9112	0.055298	0.0218443	0.0720248	0.297619	0.765994	0.999995
ENSMUSG00000002808	Epdr1	protein_coding	13	ependymin related protein 1 (zebrafish)	EPDR1	2533.1	0.0207185	0.0180051	0.0496563	0.363147	0.716495	0.999995
ENSMUSG00000002812	Flii	protein_coding	11	flightless I actin binding protein	FLII	1898.7	-0.0353673	-0.0284843	0.0579979	-0.493908	0.621371	0.999995
ENSMUSG00000002814	Top3a	protein_coding	11	topoisomerase (DNA) III alpha	TOP3A	178.644	0.0712566	0.0374842	0.0738116	0.507895	0.611527	0.999995
ENSMUSG00000002820	Atg4d	protein_coding	9	autophagy related 4D, cysteine peptidase	ATG4D	555.256	-0.0565465	-0.0426685	0.0636977	-0.668967	0.503517	0.999995
ENSMUSG00000002825	Qtrt1	protein_coding	9	queuine tRNA-ribosyltransferase catalytic subunit 1	QTRT1	109.337	0.00843247	0.00360745	0.0729991	0.0487006	0.961158	0.999995
ENSMUSG00000002831	Plin4	protein_coding	17	perilipin 4	PLIN4	376.501	-0.320219	-0.0280088	0.0319494	-0.492026	0.622701	0.999995
ENSMUSG00000002833	Hdgfl2	protein_coding	17	HDGF like 2	HDGFL2	867.311	-0.0744973	-0.0579506	0.0615822	-0.939266	0.347594	0.999995
ENSMUSG00000002835	Chaf1a	protein_coding	17	chromatin assembly factor 1, subunit A (p150)	CHAF1A	91.1475	0.0248815	0.0102431	0.0716577	0.131043	0.895741	0.999995
ENSMUSG00000002844	Adprh	protein_coding	16	ADP-ribosylarginine hydrolase	ADPRH	923.482	0.0166107	0.0133813	0.0582219	0.230528	0.817681	0.999995
ENSMUSG00000002845	Tmem39a	protein_coding	16	transmembrane protein 39a	TMEM39A	289.467	-0.0165198	-0.010396	0.0721493	-0.139336	0.889185	0.999995
ENSMUSG00000002846	Timmdc1	protein_coding	16	translocase of inner mitochondrial membrane domain containing 1	TIMMDC1	395.023	0.061176	0.0411413	0.0691227	0.599208	0.549034	0.999995
ENSMUSG00000002847	Pla1a	protein_coding	16	phospholipase A1 member A	PLA1A	14.2168	-0.210623	-0.0190855	0.0421945	-0.444257	0.656857	0.999995
ENSMUSG00000002870	Mcm2	protein_coding	6	minichromosome maintenance complex component 2	MCM2	135.965	-0.377491	-0.155191	0.0730304	-2.18148	0.0291482	0.999995
ENSMUSG00000002871	Tpra1	protein_coding	6	transmembrane protein, adipocyte asscociated 1	TPRA1	501.07	-0.158862	-0.100897	0.0707427	-1.44777	0.147681	0.999995
ENSMUSG00000002881	Nab1	protein_coding	1	Ngfi-A binding protein 1	NAB1	817.554	0.000643183	0.00059315	0.0676812	0.00666118	0.994685	0.999995
ENSMUSG00000002885	Adgre5	protein_coding	8	adhesion G protein-coupled receptor E5	ADGRE5	251.159	0.0737098	0.0424853	0.0730351	0.582134	0.560476	0.999995
ENSMUSG00000002897	Il17ra	protein_coding	6	interleukin 17 receptor A	IL17RA	291.635	-0.103046	-0.0651135	0.0710189	-0.926246	0.354318	0.999995
ENSMUSG00000002900	Lamb1	protein_coding	12	laminin B1	LAMB1	164.705	0.154342	0.0717775	0.0736762	0.963532	0.33528	0.999995
ENSMUSG00000002908	Kcnn1	protein_coding	8	potassium intermediate/small conductance calcium-activated channel, subfamily N, member 1	KCNN1	364.003	0.0358375	0.0239913	0.069275	0.348805	0.727236	0.999995
ENSMUSG00000002910	Arrdc2	protein_coding	8	arrestin domain containing 2	ARRDC2	307.923	0.156653	0.0753975	0.0736402	0.971683	0.331208	0.999995
ENSMUSG00000002930	Ppp1r17	protein_coding	6	protein phosphatase 1, regulatory subunit 17	PPP1R17	18.9232	-0.394081	-0.0406445	0.0457906	-0.920427	0.35735	0.999995
ENSMUSG00000002944	Cd36	protein_coding	5	CD36 molecule	CD36	67.2888	-2.74052	-0.0353765	0.0170523	-2.1196	0.0340397	0.999995
ENSMUSG00000002948	Map2k7	protein_coding	8	mitogen-activated protein kinase kinase 7	MAP2K7	914.828	0.0158793	0.0123177	0.0612541	0.202158	0.839793	0.999995
ENSMUSG00000002949	Timm44	protein_coding	8	translocase of inner mitochondrial membrane 44	TIMM44	681.199	-0.0983861	-0.0720731	0.0653657	-1.1038	0.269682	0.999995
ENSMUSG00000002957	Ap2a2	protein_coding	7	adaptor-related protein complex 2, alpha 2 subunit	AP2A2	3089.11	0.109556	0.0947462	0.0504036	1.88169	0.0598787	0.999995
ENSMUSG00000002963	Pnkp	protein_coding	7	polynucleotide kinase 3'- phosphatase	PNKP	358.066	0.101881	0.0686435	0.0692957	0.990849	0.321759	0.999995
ENSMUSG00000002968	Med25	protein_coding	7	mediator complex subunit 25	MED25	493.395	-0.104388	-0.0736572	0.067596	-1.08432	0.278224	0.999995
ENSMUSG00000002980	Bcam	protein_coding	7	basal cell adhesion molecule	BCAM	380.471	-0.196522	-0.115902	0.0726415	-1.60198	0.10916	0.999995
ENSMUSG00000002981	Clptm1	protein_coding	7	cleft lip and palate associated transmembrane protein 1	CLPTM1	2768.01	0.0914798	0.0792856	0.0500928	1.58452	0.113075	0.999995
ENSMUSG00000002983	Relb	protein_coding	7	avian reticuloendotheliosis viral (v-rel) oncogene related B	RELB	88.85	-0.129809	-0.0479868	0.0713056	-0.670113	0.502785	0.999995
ENSMUSG00000002984	Tomm40	protein_coding	7	translocase of outer mitochondrial membrane 40	TOMM40	836.951	0.142759	0.113765	0.0593784	1.91793	0.0551196	0.999995
ENSMUSG00000002985	Apoe	protein_coding	7	apolipoprotein E	APOE	20706.8	0.0607538	0.054597	0.044427	1.2302	0.218623	0.999995
ENSMUSG00000002996	Hbp1	protein_coding	12	high mobility group box transcription factor 1	HBP1	799.653	-0.0146495	-0.0114973	0.063828	-0.172622	0.862949	0.999995
ENSMUSG00000002997	Prkar2b	protein_coding	12	protein kinase, cAMP dependent regulatory, type II beta	PRKAR2B	775.526	0.0365093	0.0284868	0.062297	0.450717	0.652193	0.999995
ENSMUSG00000003031	Cdkn1b	protein_coding	6	cyclin-dependent kinase inhibitor 1B	CDKN1B	947.872	0.0930317	0.0751239	0.0586722	1.27497	0.202321	0.999995
ENSMUSG00000003032	Klf4	protein_coding	4	Kruppel-like factor 4 (gut)	KLF4	42.9882	0.208993	0.0473104	0.0597136	0.718105	0.472692	0.999995
ENSMUSG00000003033	Ap1m1	protein_coding	8	adaptor-related protein complex AP-1, mu subunit 1	AP1M1	954.933	0.0206741	0.0160916	0.0613903	0.262156	0.793201	0.999995
ENSMUSG00000003037	Rab8a	protein_coding	8	RAB8A, member RAS oncogene family	RAB8A	556.85	0.109152	0.0794449	0.0660737	1.19617	0.231632	0.999995
ENSMUSG00000003039	Fam32a	protein_coding	8	family with sequence similarity 32, member A	FAM32A	1618.01	0.105988	0.0887407	0.054912	1.61106	0.107168	0.999995
ENSMUSG00000003062	Stard3nl	protein_coding	13	STARD3 N-terminal like	STARD3NL	706.418	0.0645396	0.0502222	0.0611137	0.825016	0.409362	0.999995
ENSMUSG00000003068	Stk11	protein_coding	10	serine/threonine kinase 11	STK11	907.642	-0.0321049	-0.0263009	0.0570504	-0.460257	0.645332	0.999995
ENSMUSG00000003070	Efna2	protein_coding	10	ephrin A2	EFNA2	96.3024	-0.211295	-0.0820057	0.0719803	-1.13286	0.257275	0.999995
ENSMUSG00000003072	Atp5d	protein_coding	10	ATP synthase, H+ transporting, mitochondrial F1 complex, delta subunit	ATP5F1D	1964.65	-0.0363163	-0.0303813	0.0545324	-0.55774	0.577022	0.999995
ENSMUSG00000003099	Ppp5c	protein_coding	7	protein phosphatase 5, catalytic subunit	PPP5C	1261.24	0.0175395	0.0139718	0.0596955	0.233535	0.815346	0.999995
ENSMUSG00000003119	Cdk12	protein_coding	11	cyclin-dependent kinase 12	CDK12	920.032	-0.100917	-0.0819594	0.0577476	-1.41905	0.155884	0.999995
ENSMUSG00000003123	Lipe	protein_coding	7	lipase, hormone sensitive	LIPE	384.868	-0.214538	-0.129875	0.0729082	-1.71184	0.0869254	0.999995
ENSMUSG00000003131	Pafah1b2	protein_coding	9	platelet-activating factor acetylhydrolase, isoform 1b, subunit 2	PAFAH1B2	6381.61	0.0533558	0.0478599	0.044883	1.06664	0.286134	0.999995
ENSMUSG00000003134	Tbc1d8	protein_coding	1	TBC1 domain family, member 8	TBC1D8	258.404	-0.18187	-0.109218	0.0723703	-1.51092	0.13081	0.999995
ENSMUSG00000003135	Cnot11	protein_coding	1	CCR4-NOT transcription complex, subunit 11	CNOT11	365.126	-0.00500264	-0.00348731	0.0681075	-0.0509918	0.959332	0.999995
ENSMUSG00000003153	Slc2a3	protein_coding	6	solute carrier family 2 (facilitated glucose transporter), member 3	SLC2A3	1638.97	0.0891715	0.0766391	0.0513433	1.49306	0.135422	0.999995
ENSMUSG00000003154	Foxj2	protein_coding	6	forkhead box J2	FOXJ2	282.518	-0.174503	-0.0969226	0.0734029	-1.3276	0.18431	0.999995
ENSMUSG00000003161	Sri	protein_coding	5	sorcin	SRI	1168.71	0.0429477	0.0353332	0.0562161	0.629995	0.528698	0.999995
ENSMUSG00000003166	Dgcr2	protein_coding	16	DiGeorge syndrome critical region gene 2	DGCR2	1260.57	0.0196395	0.0166177	0.0535583	0.309701	0.756788	0.999995
ENSMUSG00000003184	Irf3	protein_coding	7	interferon regulatory factor 3	IRF3	344.005	-0.0824822	-0.0542176	0.070271	-0.768729	0.442054	0.999995
ENSMUSG00000003190	Bcl2l12	protein_coding	7	BCL2-like 12 (proline rich)	BCL2L12	45.9614	0.00437514	0.00162032	0.0635868	0.016862	0.986547	0.999995
ENSMUSG00000003198	Zfp959	protein_coding	17	zinc finger protein 959		93.4128	-0.0235103	-0.00832713	0.0712927	-0.121362	0.903404	0.999995
ENSMUSG00000003199	Mpnd	protein_coding	17	MPN domain containing	MPND	1245.58	-0.039692	-0.0322156	0.0578065	-0.557253	0.577354	0.999995
ENSMUSG00000003200	Sh3gl1	protein_coding	17	SH3-domain GRB2-like 1	SH3GL1	385.674	-0.0610645	-0.0394713	0.0699553	-0.577284	0.563748	0.999995
ENSMUSG00000003206	Ebi3	protein_coding	17	Epstein-Barr virus induced gene 3	EBI3	8.95692	-0.687517	-0.0378997	0.0347325	-1.14621	0.25171	0.999995
ENSMUSG00000003208	Yju2	protein_coding	17	YJU2 splicing factor	YJU2	136.189	0.0209594	0.00709167	0.0733724	0.125564	0.900077	0.999995
ENSMUSG00000003226	Ranbp2	protein_coding	10	RAN binding protein 2	RANBP2	4183.26	0.0249638	0.0216258	0.0498322	0.43547	0.663221	0.999995
ENSMUSG00000003228	Grk5	protein_coding	19	G protein-coupled receptor kinase 5	GRK5	321.495	-0.107151	-0.0661484	0.071646	-0.931372	0.351661	0.999995
ENSMUSG00000003233	Dvl3	protein_coding	16	dishevelled segment polarity protein 3	DVL3	199.19	-0.098802	-0.0545597	0.0734834	-0.744405	0.456631	0.999995
ENSMUSG00000003234	Abcf3	protein_coding	16	ATP-binding cassette, sub-family F (GCN20), member 3	ABCF3	1633.51	-0.0245536	-0.0207781	0.0532719	-0.390205	0.696385	0.999995
ENSMUSG00000003235	Eif2b5	protein_coding	16	eukaryotic translation initiation factor 2B, subunit 5 epsilon	EIF2B5	1230.79	-0.0306096	-0.0253942	0.0556345	-0.456198	0.648247	0.999995
ENSMUSG00000003269	Cyth2	protein_coding	7	cytohesin 2	CYTH2	666.882	-0.0269821	-0.020408	0.0631022	-0.325112	0.745096	0.999995
ENSMUSG00000003271	Sult2b1	protein_coding	7	sulfotransferase family, cytosolic, 2B, member 1	SULT2B1	35.5995	0.292629	0.0385569	0.0529838	0.832954	0.40487	0.999995
ENSMUSG00000003273	Car11	protein_coding	7	carbonic anhydrase 11	CA11	807.813	-0.0198589	-0.0139418	0.0677183	-0.205389	0.837268	0.999995
ENSMUSG00000003279	Dlgap1	protein_coding	17	DLG associated protein 1	DLGAP1	1434.67	-0.0119452	-0.0100594	0.0553173	-0.179578	0.857484	0.999995
ENSMUSG00000003282	Plag1	protein_coding	4	pleiomorphic adenoma gene 1	PLAG1	146.27	0.0226357	0.0107118	0.0738052	0.145084	0.884644	0.999995
ENSMUSG00000003283	Hck	protein_coding	2	hemopoietic cell kinase	HCK	52.8654	-0.181413	-0.0485216	0.0655982	-0.744839	0.456369	0.999995
ENSMUSG00000003299	Mrpl4	protein_coding	9	mitochondrial ribosomal protein L4	MRPL4	635.741	-0.0219379	-0.0164904	0.0637213	-0.259359	0.795359	0.999995
ENSMUSG00000003308	Keap1	protein_coding	9	kelch-like ECH-associated protein 1	KEAP1	1025.13	-0.0493181	-0.0402046	0.0573582	-0.701042	0.483277	0.999995
ENSMUSG00000003309	Ap1m2	protein_coding	9	adaptor protein complex AP-1, mu 2 subunit	AP1M2	18.4313	0.196307	0.0223729	0.0467471	0.473173	0.63609	0.999995
ENSMUSG00000003316	Glg1	protein_coding	8	golgi apparatus protein 1	GLG1	3741.39	-0.0309556	-0.0275175	0.0464571	-0.592289	0.553657	0.999995
ENSMUSG00000003341	Atp8b3	protein_coding	10	ATPase, class I, type 8B, member 3	ATP8B3	48.1437	0.216223	0.0522324	0.0633562	0.827343	0.408043	0.999995
ENSMUSG00000003344	Btbd2	protein_coding	10	BTB (POZ) domain containing 2	BTBD2	902.737	0.0298332	0.0216344	0.0657793	0.330185	0.74126	0.999995
ENSMUSG00000003345	Csnk1g2	protein_coding	10	casein kinase 1, gamma 2	CSNK1G2	1791.95	0.0294692	0.0254924	0.050387	0.506374	0.612594	0.999995
ENSMUSG00000003346	Abhd17a	protein_coding	10	abhydrolase domain containing 17A	ABHD17A	1630.11	0.0640397	0.0527249	0.0563675	0.935505	0.349528	0.999995
ENSMUSG00000003348	Mob3a	protein_coding	10	MOB kinase activator 3A	MOB3A	469.007	0.065097	0.0443502	0.068888	0.643726	0.519753	0.999995
ENSMUSG00000003352	Cacnb3	protein_coding	15	calcium channel, voltage-dependent, beta 3 subunit	CACNB3	416.714	0.0491756	0.0306648	0.0714847	0.431397	0.66618	0.999995
ENSMUSG00000003354	Ccdc65	protein_coding	15	coiled-coil domain containing 65	CCDC65	124.757	-0.242203	-0.108242	0.0735117	-1.47433	0.140393	0.999995
ENSMUSG00000003355	Fkbp11	protein_coding	15	FK506 binding protein 11	FKBP11	35.2551	0.160618	0.0268282	0.0552772	0.486913	0.62632	0.999995
ENSMUSG00000003360	Ddx23	protein_coding	15	DEAD (Asp-Glu-Ala-Asp) box polypeptide 23	DDX23	1598.65	0.0112888	0.00976351	0.0505434	0.193156	0.846837	0.999995
ENSMUSG00000003363	Pld3	protein_coding	7	phospholipase D family, member 3	PLD3	2918.58	0.062255	0.0527862	0.0530877	0.994316	0.320069	0.999995
ENSMUSG00000003378	Grik5	protein_coding	7	glutamate receptor, ionotropic, kainate 5 (gamma 2)	GRIK5	446.924	-0.104012	-0.0709137	0.0693943	-1.00724	0.313821	0.999995
ENSMUSG00000003379	Cd79a	protein_coding	7	CD79A antigen (immunoglobulin-associated alpha)	CD79A	1.47214	0.461658	0.00506121	0.0143704	0.301706	0.762876	0.999995
ENSMUSG00000003380	Rabac1	protein_coding	7	Rab acceptor 1 (prenylated)	RABAC1	1943.15	0.101557	0.0799228	0.0604459	1.32354	0.185657	0.999995
ENSMUSG00000003382	Etv3	protein_coding	3	ets variant 3	ETV3	640.285	-0.0122016	-0.00911595	0.064043	-0.142815	0.886436	0.999995
ENSMUSG00000003402	Prkcsh	protein_coding	9	protein kinase C substrate 80K-H	PRKCSH	1085.94	-0.154414	-0.124224	0.0586176	-2.11922	0.0340716	0.999995
ENSMUSG00000003410	Elavl3	protein_coding	9	ELAV like RNA binding protein 3	ELAVL3	3242.18	-0.00873424	-0.00709434	0.0580802	-0.121696	0.903139	0.999995
ENSMUSG00000003411	Rab3b	protein_coding	4	RAB3B, member RAS oncogene family	RAB3B	419.577	-0.054264	-0.037154	0.0696044	-0.520878	0.602452	0.999995
ENSMUSG00000003418	St8sia6	protein_coding	2	ST8 alpha-N-acetyl-neuraminide alpha-2,8-sialyltransferase 6	ST8SIA6	128.843	-0.174726	-0.0769514	0.073499	-1.06231	0.288093	0.999995
ENSMUSG00000003420	Fcgrt	protein_coding	7	Fc receptor, IgG, alpha chain transporter	FCGRT	332.706	0.0600076	0.0349075	0.0724454	0.496271	0.619703	0.999995
ENSMUSG00000003421	Nosip	protein_coding	7	nitric oxide synthase interacting protein	NOSIP	632.242	0.0503497	0.03792	0.0637386	0.594951	0.551876	0.999995
ENSMUSG00000003423	Pih1d1	protein_coding	7	PIH1 domain containing 1	PIH1D1	388.118	-0.015646	-0.00830211	0.0736789	-0.114606	0.908757	0.999995
ENSMUSG00000003429	Rps11	protein_coding	7	ribosomal protein S11	RPS11	2286.08	0.121991	0.10169	0.0550715	1.84629	0.0648505	0.999995
ENSMUSG00000003435	Supt5	protein_coding	7	suppressor of Ty 5, DSIF elongation factor subunit	SUPT5H	2568.75	-0.0374542	-0.0322066	0.0514162	-0.625882	0.531392	0.999995
ENSMUSG00000003436	Dll3	protein_coding	7	delta like canonical Notch ligand 3	DLL3	30.1259	0.124952	0.0121464	0.0486638	0.316947	0.751284	0.999995
ENSMUSG00000003437	Paf1	protein_coding	7	Paf1, RNA polymerase II complex component	PAF1	873.084	-0.0027487	-0.00194036	0.0597967	-0.0364927	0.97089	0.999995
ENSMUSG00000003438	Timm50	protein_coding	7	translocase of inner mitochondrial membrane 50	TIMM50	415.417	0.102042	0.0696351	0.0688736	1.00964	0.31267	0.999995
ENSMUSG00000003444	Med29	protein_coding	7	mediator complex subunit 29	MED29	171.415	0.217211	0.116029	0.0737536	1.56865	0.116731	0.999995
ENSMUSG00000003452	Bicd1	protein_coding	6	BICD cargo adaptor 1	BICD1	2218.49	-0.0263559	-0.0226396	0.0506052	-0.450204	0.652563	0.999995
ENSMUSG00000003458	Ncstn	protein_coding	1	nicastrin	NCSTN	699.09	0.000240802	0.00079057	0.0635152	0.00286502	0.997714	0.999995
ENSMUSG00000003464	Pex19	protein_coding	1	peroxisomal biogenesis factor 19	PEX19	1530.25	0.193833	0.152824	0.0608943	2.49354	0.0126476	0.999995
ENSMUSG00000003469	Phyhip	protein_coding	14	phytanoyl-CoA hydroxylase interacting protein	PHYHIP	928.779	-0.0536748	-0.0401063	0.0647748	-0.613805	0.539344	0.999995
ENSMUSG00000003476	Crhr2	protein_coding	6	corticotropin releasing hormone receptor 2	CRHR2	7.36755	-0.199713	-0.00907846	0.0310399	-0.296827	0.766599	0.999995
ENSMUSG00000003484	Cyp4f18	protein_coding	8	cytochrome P450, family 4, subfamily f, polypeptide 18	CYP4F2	1.09928	1.22464	0.00833935	0.0121831	0.66255	0.507619	0.999995
ENSMUSG00000003500	Impdh1	protein_coding	6	inosine monophosphate dehydrogenase 1	IMPDH1	737.37	0.0987442	0.0693312	0.0676223	1.02487	0.305425	0.999995
ENSMUSG00000003518	Dusp3	protein_coding	11	dual specificity phosphatase 3 (vaccinia virus phosphatase VH1-related)	DUSP3	2933.63	0.0596035	0.0518716	0.0494716	1.04994	0.293744	0.999995
ENSMUSG00000003526	Prodh	protein_coding	16	proline dehydrogenase	PRODH	467.029	0.190994	0.126895	0.069444	1.8456	0.0649499	0.999995
ENSMUSG00000003527	Ess2	protein_coding	16	ess-2 splicing factor	ESS2	424.172	-0.0904046	-0.0629669	0.0677398	-0.934092	0.350256	0.999995
ENSMUSG00000003528	Slc25a1	protein_coding	16	solute carrier family 25 (mitochondrial carrier, citrate transporter), member 1	SLC25A1	1333.14	-0.0352496	-0.027985	0.0596778	-0.469572	0.638661	0.999995
ENSMUSG00000003531	Dgcr6	protein_coding	16	DiGeorge syndrome critical region gene 6	DGCR6	500.502	0.0980542	0.0719966	0.0654298	1.09782	0.272285	0.999995
ENSMUSG00000003534	Ddr1	protein_coding	17	discoidin domain receptor family, member 1	DDR1	2039.33	-0.0465496	-0.0381861	0.0571443	-0.665621	0.505653	0.999995
ENSMUSG00000003541	Ier3	protein_coding	17	immediate early response 3	IER3	124.878	0.0273059	0.0123597	0.0735775	0.167912	0.866653	0.999995
ENSMUSG00000003545	Fosb	protein_coding	7	FBJ osteosarcoma oncogene B	FOSB	24.2185	0.14263	0.0211451	0.0520147	0.396923	0.691425	0.999995
ENSMUSG00000003546	Klc4	protein_coding	17	kinesin light chain 4	KLC4	509.762	-0.0640617	-0.0445558	0.0677812	-0.660972	0.50863	0.999995
ENSMUSG00000003549	Ercc1	protein_coding	7	excision repair cross-complementing rodent repair deficiency, complementation group 1	ERCC1	262.788	0.0653528	0.0373593	0.0730205	0.516817	0.605284	0.999995
ENSMUSG00000003559	As3mt	protein_coding	19	arsenic (+3 oxidation state) methyltransferase	AS3MT	402.455	-0.039583	-0.0236291	0.0724387	-0.327502	0.743288	0.999995
ENSMUSG00000003573	Homer3	protein_coding	8	homer scaffolding protein 3	HOMER3	275.248	0.0892098	0.0554731	0.0717623	0.770402	0.441061	0.999995
ENSMUSG00000003575	Crtc1	protein_coding	8	CREB regulated transcription coactivator 1	CRTC1	467.589	-0.0749162	-0.0482453	0.0708191	-0.680185	0.496387	0.999995
ENSMUSG00000003581	Rnf215	protein_coding	11	ring finger protein 215	RNF215	482.055	0.163452	0.115369	0.0673376	1.71402	0.0865246	0.999995
ENSMUSG00000003585	Sec14l2	protein_coding	11	SEC14-like lipid binding 2	SEC14L2	787.921	0.0819339	0.0660553	0.0584334	1.13042	0.258301	0.999995
ENSMUSG00000003604	Aven	protein_coding	2	apoptosis, caspase activation inhibitor	AVEN	359.286	0.0322763	0.0202387	0.0709959	0.290491	0.771441	0.999995
ENSMUSG00000003617	Cp	protein_coding	3	ceruloplasmin	CP	405.326	-0.248984	-0.0660425	0.0617171	-0.906775	0.364526	0.999995
ENSMUSG00000003623	Crot	protein_coding	5	carnitine O-octanoyltransferase	CROT	862.106	0.0432191	0.0344481	0.0595405	0.577979	0.563278	0.999995
ENSMUSG00000003644	Rps6ka1	protein_coding	4	ribosomal protein S6 kinase polypeptide 1	RPS6KA1	471.93	-0.0209623	-0.0149117	0.0669281	-0.22305	0.823496	0.999995
ENSMUSG00000003657	Calb2	protein_coding	8	calbindin 2	CALB2	2653.62	0.048674	0.0362239	0.0646516	0.558883	0.576242	0.999995
ENSMUSG00000003660	Snrnp200	protein_coding	2	small nuclear ribonucleoprotein 200 (U5)	SNRNP200	3454.51	0.0300194	0.0267112	0.0462682	0.577391	0.563676	0.999995
ENSMUSG00000003662	Ciao1	protein_coding	2	cytosolic iron-sulfur protein assembly 1	CIAO1	896.423	-0.0884283	-0.069596	0.0606589	-1.14531	0.25208	0.999995
ENSMUSG00000003665	Has1	protein_coding	17	hyaluronan synthase 1	HAS1	32.4857	0.0819405	0.0148195	0.0562611	0.255808	0.798099	0.999995
ENSMUSG00000003680	Taf6l	protein_coding	19	TATA-box binding protein associated factor 6 like	TAF6L	187.591	-0.00630572	-0.00315942	0.073591	-0.0468301	0.962649	0.999995
ENSMUSG00000003721	Insig2	protein_coding	1	insulin induced gene 2	INSIG2	720.515	-0.0140078	-0.0109724	0.0610001	-0.179651	0.857426	0.999995
ENSMUSG00000003731	Kpna6	protein_coding	4	karyopherin (importin) alpha 6	KPNA6	2149.08	0.028459	0.0247251	0.0505797	0.48647	0.626634	0.999995
ENSMUSG00000003746	Man1a	protein_coding	10	mannosidase 1, alpha	MAN1A1	533.392	0.00730726	0.00556582	0.0637821	0.0862272	0.931286	0.999995
ENSMUSG00000003752	Itpkc	protein_coding	7	inositol 1,4,5-trisphosphate 3-kinase C	ITPKC	182.324	-0.0992639	-0.0511561	0.0738534	-0.698748	0.48471	0.999995
ENSMUSG00000003762	Coq8b	protein_coding	7	coenzyme Q8B	COQ8B	301.809	-0.0685283	-0.0442684	0.0707669	-0.623848	0.532727	0.999995
ENSMUSG00000003778	Brd8	protein_coding	18	bromodomain containing 8	BRD8	1408.37	0.0133548	0.0114714	0.0554194	0.200209	0.841317	0.999995
ENSMUSG00000003779	Kif20a	protein_coding	18	kinesin family member 20A	KIF20A	14.3797	0.120968	0.011447	0.0429065	0.261613	0.79362	0.999995
ENSMUSG00000003808	Farsa	protein_coding	8	phenylalanyl-tRNA synthetase, alpha subunit	FARSA	525.776	0.00979469	0.00739614	0.0670542	0.103758	0.917361	0.999995
ENSMUSG00000003809	Gcdh	protein_coding	8	glutaryl-Coenzyme A dehydrogenase	GCDH	499.019	-0.0198576	-0.0137805	0.0679197	-0.203842	0.838477	0.999995
ENSMUSG00000003810	Mast2	protein_coding	4	microtubule associated serine/threonine kinase 2	MAST2	1767.12	-0.0344336	-0.0279007	0.0569402	-0.495148	0.620495	0.999995
ENSMUSG00000003812	Dnase2a	protein_coding	8	deoxyribonuclease II alpha	DNASE2	75.2263	0.0389585	0.0136511	0.070446	0.192813	0.847106	0.999995
ENSMUSG00000003813	Rad23a	protein_coding	8	RAD23 homolog A, nucleotide excision repair protein	RAD23A	811.717	-0.0507126	-0.038735	0.0627348	-0.61788	0.536654	0.999995
ENSMUSG00000003814	Calr	protein_coding	8	calreticulin	CALR	5239.89	0.107393	0.0956068	0.0461313	2.07345	0.0381307	0.999995
ENSMUSG00000003824	Syce2	protein_coding	8	synaptonemal complex central element protein 2	SYCE2	8.98185	-0.60239	-0.0374306	0.0351646	-1.01878	0.308309	0.999995
ENSMUSG00000003847	Nfat5	protein_coding	8	nuclear factor of activated T cells 5	NFAT5	1159.99	-0.0553132	-0.0457715	0.0558242	-0.820106	0.412155	0.999995
ENSMUSG00000003848	Nob1	protein_coding	8	NIN1/RPN12 binding protein 1 homolog	NOB1	260.551	0.063917	0.0380363	0.0724325	0.529073	0.596755	0.999995
ENSMUSG00000003849	Nqo1	protein_coding	8	NAD(P)H dehydrogenase, quinone 1	NQO1	201.066	0.04879	0.0261798	0.0737195	0.354817	0.722726	0.999995
ENSMUSG00000003863	Ppfia3	protein_coding	7	protein tyrosine phosphatase, receptor type, f polypeptide (PTPRF), interacting protein (liprin), alpha 3	PPFIA3	1244.71	-0.112433	-0.0911326	0.0580298	-1.56865	0.116729	0.999995
ENSMUSG00000003865	Gys1	protein_coding	7	glycogen synthase 1, muscle	GYS1	371.757	-0.0121648	-0.00783228	0.0707844	-0.11066	0.911886	0.999995
ENSMUSG00000003868	Ruvbl2	protein_coding	7	RuvB-like protein 2	RUVBL2	463.52	0.0759314	0.0549599	0.0661164	0.830915	0.406022	0.999995
ENSMUSG00000003872	Lin7b	protein_coding	7	lin-7 homolog B (C. elegans)	LIN7B	388.39	0.120416	0.0786428	0.0704213	1.11463	0.265009	0.999995
ENSMUSG00000003873	Bax	protein_coding	7	BCL2-associated X protein	BAX	358.401	-0.0414439	-0.0277722	0.0695305	-0.399094	0.689824	0.999995
ENSMUSG00000003882	Il7r	protein_coding	15	interleukin 7 receptor	IL7R	13.1402	-0.239497	-0.0199303	0.0407393	-0.485861	0.627066	0.999995
ENSMUSG00000003923	Tfam	protein_coding	10	transcription factor A, mitochondrial	TFAM	823.443	0.163365	0.126686	0.0615072	2.06439	0.038981	0.999995
ENSMUSG00000003929	Zfp81	protein_coding	17	zinc finger protein 81		335.158	0.0718933	0.0471804	0.0703058	0.669062	0.503456	0.999995
ENSMUSG00000003934	Efnb3	protein_coding	11	ephrin B3	EFNB3	3288.24	-0.016552	-0.0140182	0.0518664	-0.273244	0.784666	0.999995
ENSMUSG00000003948	Mmd	protein_coding	11	monocyte to macrophage differentiation-associated	MMD	406.358	-0.068352	-0.0433893	0.0714709	-0.600031	0.548485	0.999995
ENSMUSG00000003949	Hlf	protein_coding	11	hepatic leukemia factor	HLF	508.409	-0.141254	-0.0986375	0.0678657	-1.45268	0.146311	0.999995
ENSMUSG00000003955	Fam162a	protein_coding	16	family with sequence similarity 162, member A	FAM162A	322.091	-0.0503458	-0.034007	0.0700523	-0.473899	0.635572	0.999995
ENSMUSG00000003974	Grm3	protein_coding	5	glutamate receptor, metabotropic 3	GRM3	1166.94	0.0332109	0.0255351	0.0617247	0.417015	0.676667	0.999995
ENSMUSG00000003992	Ssbp2	protein_coding	13	single-stranded DNA binding protein 2	SSBP2	1484.9	0.0591761	0.0509887	0.0511975	0.994746	0.31986	0.999995
ENSMUSG00000004018	Fancl	protein_coding	11	Fanconi anemia, complementation group L	FANCL	85.498	-0.1006	-0.0379417	0.0716015	-0.527995	0.597503	0.999995
ENSMUSG00000004031	Brinp2	protein_coding	1	bone morphogenic protein/retinoic acid inducible neural-specific 2	BRINP2	632.942	0.0398236	0.0307436	0.0621088	0.494381	0.621037	0.999995
ENSMUSG00000004032	Gstm5	protein_coding	3	glutathione S-transferase, mu 5	GSTM3	1835.83	0.0951401	0.081034	0.0523261	1.55118	0.120859	0.999995
ENSMUSG00000004035	Gstm7	protein_coding	3	glutathione S-transferase, mu 7	GSTM2	857.797	0.0584951	0.0384102	0.0667543	0.626158	0.531211	0.999995
ENSMUSG00000004038	Gstm3	protein_coding	3	glutathione S-transferase, mu 3		1.51028	1.1648	0.011587	0.0150501	0.770579	0.440957	0.999995
ENSMUSG00000004040	Stat3	protein_coding	11	signal transducer and activator of transcription 3	STAT3	1782.38	0.00486209	0.00417849	0.055542	0.072648	0.942086	0.999995
ENSMUSG00000004043	Stat5a	protein_coding	11	signal transducer and activator of transcription 5A	STAT5A	90.2833	-0.198367	-0.0726812	0.0712429	-1.02043	0.307522	0.999995
ENSMUSG00000004044	Cavin1	protein_coding	11	caveolae associated 1	CAVIN1	317.895	-0.231498	-0.0617926	0.064317	-0.912644	0.36143	0.999995
ENSMUSG00000004054	Map3k11	protein_coding	19	mitogen-activated protein kinase kinase kinase 11	MAP3K11	533.259	-0.103547	-0.0770386	0.0644991	-1.19446	0.232298	0.999995
ENSMUSG00000004056	Akt2	protein_coding	7	thymoma viral proto-oncogene 2	AKT2	1024.62	-0.000622116	-0.00097308	0.0586376	-0.00853393	0.993191	0.999995
ENSMUSG00000004069	Dnaja3	protein_coding	16	DnaJ heat shock protein family (Hsp40) member A3	DNAJA3	1154.93	0.0761974	0.0621742	0.0572907	1.08518	0.277842	0.999995
ENSMUSG00000004070	Hmox2	protein_coding	16	heme oxygenase 2	HMOX2	1447.11	0.0757512	0.0636825	0.0540762	1.1779	0.238838	0.999995
ENSMUSG00000004071	Cdip1	protein_coding	16	cell death inducing Trp53 target 1	CDIP1	4032.46	0.0130882	0.0118381	0.0437192	0.270377	0.786871	0.999995
ENSMUSG00000004085	Map3k20	protein_coding	2	mitogen-activated protein kinase kinase kinase 20	MAP3K20	563.98	-0.190074	-0.14015	0.065078	-2.15212	0.0313882	0.999995
ENSMUSG00000004096	Cwc15	protein_coding	9	CWC15 spliceosome-associated protein	CWC15	938.274	0.0351468	0.0276916	0.0605081	0.457228	0.647507	0.999995
ENSMUSG00000004098	Col5a3	protein_coding	9	collagen, type V, alpha 3	COL5A3	186.004	-0.188493	-0.0875946	0.0730581	-1.09144	0.275078	0.999995
ENSMUSG00000004099	Dnmt1	protein_coding	9	DNA methyltransferase (cytosine-5) 1	DNMT1	1191.07	0.0250916	0.0204457	0.0573495	0.356767	0.721267	0.999995
ENSMUSG00000004100	Ppan	protein_coding	9	peter pan homolog	PPAN	204.267	-0.0686107	-0.0381206	0.0734312	-0.520323	0.602838	0.999995
ENSMUSG00000004105	Angptl2	protein_coding	2	angiopoietin-like 2	ANGPTL2	128.347	-0.0865336	-0.0363002	0.0729794	-0.498825	0.617903	0.999995
ENSMUSG00000004110	Cacna1e	protein_coding	1	calcium channel, voltage-dependent, R type, alpha 1E subunit	CACNA1E	2185.56	-0.0200223	-0.0147518	0.0660305	-0.219742	0.826072	0.999995
ENSMUSG00000004113	Cacna1b	protein_coding	2	calcium channel, voltage-dependent, N type, alpha 1B subunit	CACNA1B	1102.96	-0.063397	-0.0476038	0.0652809	-0.713251	0.475691	0.999995
ENSMUSG00000004127	Trmt10a	protein_coding	3	tRNA methyltransferase 10A	TRMT10A	198.266	-0.0772593	-0.0382637	0.0738786	-0.538659	0.590122	0.999995
ENSMUSG00000004151	Etv1	protein_coding	12	ets variant 1	ETV1	1133.12	0.00663452	0.00300236	0.0619549	0.0827362	0.934061	0.999995
ENSMUSG00000004187	Kifc2	protein_coding	15	kinesin family member C2	KIFC2	2079.41	-0.0186519	-0.0164418	0.0503482	-0.320823	0.748344	0.999995
ENSMUSG00000004207	Psap	protein_coding	10	prosaposin	PSAP	24343.5	0.0597637	0.0551866	0.0393121	1.40381	0.160376	0.999995
ENSMUSG00000004221	Ikbkg	protein_coding	X	inhibitor of kappaB kinase gamma	IKBKG	898.263	0.0184739	0.0147396	0.059771	0.245447	0.806111	0.999995
ENSMUSG00000004231	Pax2	protein_coding	19	paired box 2	PAX2	42.4226	0.0906242	0.0192364	0.0620758	0.333666	0.738632	0.999995
ENSMUSG00000004233	Wars2	protein_coding	3	tryptophanyl tRNA synthetase 2 (mitochondrial)	WARS2	180.891	-0.0173264	-0.00839447	0.0739012	-0.115142	0.908332	0.999995
ENSMUSG00000004263	Atn1	protein_coding	6	atrophin 1	ATN1	21.9907	-0.315443	-0.0365573	0.0492746	-0.811547	0.417052	0.999995
ENSMUSG00000004264	Phb2	protein_coding	6	prohibitin 2	PHB2	882.795	0.033432	0.0268152	0.0588815	0.455495	0.648753	0.999995
ENSMUSG00000004266	Ptpn6	protein_coding	6	protein tyrosine phosphatase, non-receptor type 6	PTPN6	87.5405	0.22948	0.0800286	0.0703425	1.12825	0.259214	0.999995
ENSMUSG00000004267	Eno2	protein_coding	6	enolase 2, gamma neuronal	ENO2	15186.2	-0.0676302	-0.0596009	0.0477685	-1.24809	0.211998	0.999995
ENSMUSG00000004268	Emg1	protein_coding	6	EMG1 N1-specific pseudouridine methyltransferase	EMG1	435.545	0.131874	0.093165	0.0673204	1.38377	0.166429	0.999995
ENSMUSG00000004270	Lpcat3	protein_coding	6	lysophosphatidylcholine acyltransferase 3	LPCAT3	268.536	0.106849	0.0660177	0.0716293	0.929769	0.352491	0.999995
ENSMUSG00000004285	Atp6v1f	protein_coding	6	ATPase, H+ transporting, lysosomal V1 subunit F	ATP6V1F	1215.53	0.0507185	0.0412689	0.0574063	0.720012	0.471518	0.999995
ENSMUSG00000004317	Clcn5	protein_coding	X	chloride channel, voltage-sensitive 5	CLCN5	1098.66	0.069112	0.0563159	0.0574229	0.980683	0.326749	0.999995
ENSMUSG00000004319	Clcn3	protein_coding	8	chloride channel, voltage-sensitive 3	CLCN3	5159.05	0.00373478	0.00331194	0.0443324	0.0758271	0.939557	0.999995
ENSMUSG00000004328	Hif3a	protein_coding	7	hypoxia inducible factor 3, alpha subunit	HIF3A	45.0456	0.0521521	0.0080258	0.0605947	0.183798	0.854172	0.999995
ENSMUSG00000004347	Pde1c	protein_coding	6	phosphodiesterase 1C	PDE1C	800.471	0.0303801	0.0233904	0.062205	0.376084	0.706854	0.999995
ENSMUSG00000004356	Utp20	protein_coding	10	UTP20 small subunit processome component	UTP20	704.254	-0.0600699	-0.0459265	0.0624829	-0.737417	0.460869	0.999995
ENSMUSG00000004360	9330159F19Rik	protein_coding	10	RIKEN cDNA 9330159F19 gene	KIAA0408	1201.1	0.0289837	0.0220176	0.0642889	0.336633	0.736393	0.999995
ENSMUSG00000004364	Cul3	protein_coding	1	cullin 3	CUL3	2375.85	0.0067753	0.00588192	0.0505632	0.115867	0.907758	0.999995
ENSMUSG00000004366	Sst	protein_coding	16	somatostatin	SST	926.169	0.0796691	0.0586122	0.0646382	0.915116	0.360131	0.999995
ENSMUSG00000004371	Il11	protein_coding	7	interleukin 11	IL11	15.1937	0.719119	0.0612444	0.0432293	1.55588	0.119737	0.999995
ENSMUSG00000004383	Large1	protein_coding	8	LARGE xylosyl- and glucuronyltransferase 1	LARGE1	1460.91	-0.0247958	-0.0210363	0.0533732	-0.392973	0.694339	0.999995
ENSMUSG00000004393	Ddx56	protein_coding	11	DEAD (Asp-Glu-Ala-Asp) box polypeptide 56	DDX56	645.466	0.0735365	0.0565051	0.0624324	0.904142	0.36592	0.999995
ENSMUSG00000004394	Tmed4	protein_coding	11	transmembrane p24 trafficking protein 4	TMED4	1247.95	-0.0487349	-0.0408954	0.0544054	-0.751037	0.45263	0.999995
ENSMUSG00000004415	Col26a1	protein_coding	5	collagen, type XXVI, alpha 1	COL26A1	65.8001	-0.414882	-0.101251	0.0628192	-1.55721	0.11942	0.999995
ENSMUSG00000004446	Bid	protein_coding	6	BH3 interacting domain death agonist	BID	165.665	0.0617328	0.0311192	0.07391	0.421087	0.673692	0.999995
ENSMUSG00000004451	Ralb	protein_coding	1	v-ral simian leukemia viral oncogene B	RALB	480.901	0.144828	0.102603	0.0670858	1.53248	0.125404	0.999995
ENSMUSG00000004455	Ppp1cc	protein_coding	5	protein phosphatase 1 catalytic subunit gamma	PPP1CC	1545.52	0.087323	0.0743197	0.052633	1.41196	0.157961	0.999995
ENSMUSG00000004460	Dnajb11	protein_coding	16	DnaJ heat shock protein family (Hsp40) member B11	DNAJB11	754.088	0.0148525	0.0115735	0.0607652	0.191788	0.847908	0.999995
ENSMUSG00000004462	Tbccd1	protein_coding	16	TBCC domain containing 1	TBCCD1	286.165	-0.0480846	-0.0310847	0.0708754	-0.435415	0.663261	0.999995
ENSMUSG00000004473	Clec11a	protein_coding	7	C-type lectin domain family 11, member a	CLEC11A	44.5031	-0.0477349	-0.0096536	0.0631781	-0.181604	0.855894	0.999995
ENSMUSG00000004500	Zfp324	protein_coding	7	zinc finger protein 324	ZNF324,ZNF324B	284.718	0.116785	0.0726598	0.0716482	1.01516	0.310027	0.999995
ENSMUSG00000004508	Gab2	protein_coding	7	growth factor receptor bound protein 2-associated protein 2	GAB2	1000.55	-0.0614416	-0.0491024	0.0592172	-0.829207	0.406987	0.999995
ENSMUSG00000004530	Coro1c	protein_coding	5	coronin, actin binding protein 1C	CORO1C	1864.02	0.0330812	0.0284273	0.0516252	0.549683	0.582537	0.999995
ENSMUSG00000004535	Tax1bp1	protein_coding	6	Tax1 (human T cell leukemia virus type I) binding protein 1	TAX1BP1	3820.81	-0.00203919	-0.00212405	0.052127	-0.0334269	0.973334	0.999995
ENSMUSG00000004552	Ctse	protein_coding	1	cathepsin E	CTSE	21.5175	-1.64358	-0.0172513	0.0172303	-1.30707	0.191187	0.999995
ENSMUSG00000004558	Ndrg2	protein_coding	14	N-myc downstream regulated gene 2	NDRG2	17706.2	0.0259493	0.0233788	0.0433835	0.541203	0.588368	0.999995
ENSMUSG00000004561	Mettl17	protein_coding	14	methyltransferase like 17	METTL17	312.386	0.0877419	0.0543383	0.0724371	0.726	0.467839	0.999995
ENSMUSG00000004562	Arhgef40	protein_coding	14	Rho guanine nucleotide exchange factor (GEF) 40	ARHGEF40	910.436	-0.104626	-0.080768	0.0621403	-1.29758	0.194431	0.999995
ENSMUSG00000004565	Pnpla6	protein_coding	8	patatin-like phospholipase domain containing 6	PNPLA6	1790.86	-0.115586	-0.0959772	0.0556939	-1.71981	0.0854661	0.999995
ENSMUSG00000004567	Mcoln1	protein_coding	8	mucolipin 1	MCOLN1	909.987	-0.0183601	-0.0146933	0.0594746	-0.245994	0.805687	0.999995
ENSMUSG00000004568	Arhgef18	protein_coding	8	rho/rac guanine nucleotide exchange factor (GEF) 18	ARHGEF18	908.43	0.0923703	0.0673265	0.0655522	1.03005	0.302985	0.999995
ENSMUSG00000004591	Pkn2	protein_coding	3	protein kinase N2	PKN2	885.307	-0.11632	-0.0932476	0.058915	-1.58317	0.113384	0.999995
ENSMUSG00000004609	Cd33	protein_coding	7	CD33 antigen	CD33	75.6575	0.168689	0.0494794	0.068179	0.759009	0.447847	0.999995
ENSMUSG00000004610	Etfb	protein_coding	7	electron transferring flavoprotein, beta polypeptide	ETFB	195.201	0.0111565	0.00444958	0.0739055	0.0744028	0.94069	0.999995
ENSMUSG00000004612	Nkg7	protein_coding	7	natural killer cell group 7 sequence	NKG7	0.681814	1.92559	0.00687547	0.0091095	0.807395	0.419439	0.999995
ENSMUSG00000004626	Stxbp2	protein_coding	8	syntaxin binding protein 2	STXBP2	122.03	-0.230291	-0.0943212	0.072764	-1.30328	0.19248	0.999995
ENSMUSG00000004631	Sgce	protein_coding	6	sarcoglycan, epsilon	SGCE	529.407	0.0315802	0.0230916	0.065166	0.356639	0.721362	0.999995
ENSMUSG00000004633	Chn2	protein_coding	6	chimerin 2	CHN2	805.76	0.0404836	0.0316725	0.0606448	0.524581	0.599874	0.999995
ENSMUSG00000004637	Wwox	protein_coding	8	WW domain-containing oxidoreductase	WWOX	480.209	0.0394803	0.0289549	0.0667016	0.423412	0.671995	0.999995
ENSMUSG00000004642	Slbp	protein_coding	5	stem-loop binding protein	SLBP	523.639	0.100607	0.0713826	0.0671292	1.06295	0.287805	0.999995
ENSMUSG00000004655	Aqp1	protein_coding	6	aquaporin 1	AQP1	6.43383	-2.11446	-0.0568135	0.0246163	-2.21622	0.0266761	0.999995
ENSMUSG00000004661	Arid3b	protein_coding	9	AT rich interactive domain 3B (BRIGHT-like)	ARID3B	59.7071	-0.144046	-0.0435156	0.0674424	-0.630273	0.528516	0.999995
ENSMUSG00000004665	Cnn2	protein_coding	10	calponin 2	CNN2	84.8798	-0.110055	-0.0404978	0.0707678	-0.552849	0.580367	0.999995
ENSMUSG00000004667	Polr2e	protein_coding	10	polymerase (RNA) II (DNA directed) polypeptide E	POLR2E	472.721	-0.0222754	-0.0152343	0.0683776	-0.224725	0.822194	0.999995
ENSMUSG00000004668	Abca13	protein_coding	11	ATP-binding cassette, sub-family A (ABC1), member 13	ABCA13	9.50034	0.753706	0.0396264	0.0336064	1.21538	0.224221	0.999995
ENSMUSG00000004677	Myo9b	protein_coding	8	myosin IXb	MYO9B	1211.4	-0.088327	-0.0695717	0.0606708	-1.14362	0.252782	0.999995
ENSMUSG00000004698	Hdac9	protein_coding	12	histone deacetylase 9	HDAC9	684.772	-0.0328002	-0.0236281	0.0664314	-0.355095	0.722519	0.999995
ENSMUSG00000004707	Ly9	protein_coding	1	lymphocyte antigen 9	LY9	13.1847	0.488231	0.0440837	0.0417462	1.01657	0.309357	0.999995
ENSMUSG00000004709	Cd244a	protein_coding	1	CD244 molecule A	CD244	2.50385	0.25384	0.00387455	0.0170754	0.200276	0.841265	0.999995
ENSMUSG00000004730	Adgre1	protein_coding	17	adhesion G protein-coupled receptor E1	ADGRE1	122.546	0.264878	0.104661	0.0724563	1.46591	0.142673	0.999995
ENSMUSG00000004748	Mtfp1	protein_coding	11	mitochondrial fission process 1	MTFP1	514.167	0.058695	0.0411314	0.0677448	0.606461	0.544209	0.999995
ENSMUSG00000004768	Rab23	protein_coding	1	RAB23, member RAS oncogene family	RAB23	410.517	-0.169331	-0.116826	0.0683642	-1.7087	0.0875068	0.999995
ENSMUSG00000004771	Rab11a	protein_coding	9	RAB11A, member RAS oncogene family	RAB11A	2746.33	0.0792434	0.0698161	0.0478432	1.45942	0.14445	0.999995
ENSMUSG00000004788	Eif2b2	protein_coding	12	eukaryotic translation initiation factor 2B, subunit 2 beta	EIF2B2	486.536	-0.00477381	-0.00316002	0.0683737	-0.0481686	0.961582	0.999995
ENSMUSG00000004789	Dlst	protein_coding	12	dihydrolipoamide S-succinyltransferase (E2 component of 2-oxo-glutarate complex)	DLST	2614.44	0.0167231	0.0145428	0.0500845	0.289727	0.772025	0.999995
ENSMUSG00000004791	Pgf	protein_coding	12	placental growth factor	PGF	191.253	-0.0517353	-0.0268608	0.0737977	-0.37001	0.711375	0.999995
ENSMUSG00000004798	Ulk2	protein_coding	11	unc-51 like kinase 2	ULK2	1880.02	-0.0641423	-0.055406	0.0507346	-1.09181	0.274916	0.999995
ENSMUSG00000004815	Dgkq	protein_coding	5	diacylglycerol kinase, theta	DGKQ	1240.7	-0.0554889	-0.0467527	0.0540017	-0.864529	0.387297	0.999995
ENSMUSG00000004837	Grap	protein_coding	11	GRB2-related adaptor protein	GRAP	97.8643	0.0623071	0.0204828	0.0706001	0.310528	0.756159	0.999995
ENSMUSG00000004843	Chmp2b	protein_coding	16	charged multivesicular body protein 2B	CHMP2B	691.283	-0.0377296	-0.0275236	0.0653593	-0.423396	0.672006	0.999995
ENSMUSG00000004846	Plod3	protein_coding	5	procollagen-lysine, 2-oxoglutarate 5-dioxygenase 3	PLOD3	631.311	-0.036373	-0.025614	0.0674764	-0.379519	0.704303	0.999995
ENSMUSG00000004849	Ap1s1	protein_coding	5	adaptor protein complex AP-1, sigma 1	AP1S1	931.815	0.0437068	0.0349726	0.0595696	0.584006	0.559216	0.999995
ENSMUSG00000004864	Mapk13	protein_coding	17	mitogen-activated protein kinase 13	MAPK13	2.61429	0.256191	0.00479659	0.0206453	0.246739	0.80511	0.999995
ENSMUSG00000004865	Srpk1	protein_coding	17	serine/arginine-rich protein specific kinase 1	SRPK1	1103.33	-0.0156502	-0.0129599	0.0568815	-0.225411	0.82166	0.999995
ENSMUSG00000004872	Pax3	protein_coding	1	paired box 3	PAX3	29.2489	0.0596694	0.00810502	0.0549738	0.179702	0.857387	0.999995
ENSMUSG00000004880	Lbr	protein_coding	1	lamin B receptor	LBR	468.227	0.033898	0.0245379	0.0659637	0.372862	0.709251	0.999995
ENSMUSG00000004885	Crabp2	protein_coding	3	cellular retinoic acid binding protein II	CRABP2	5.62531	-1.63051	-0.0413484	0.0237634	-1.73587	0.0825869	0.999995
ENSMUSG00000004891	Nes	protein_coding	3	nestin	NES	346.583	-0.0795981	-0.0490396	0.0726205	-0.649923	0.515742	0.999995
ENSMUSG00000004892	Bcan	protein_coding	3	brevican	BCAN	3894.54	-0.0515099	-0.0446037	0.0505452	-0.881313	0.378148	0.999995
ENSMUSG00000004894	Hapln2	protein_coding	3	hyaluronan and proteoglycan link protein 2	HAPLN2	2339.46	0.0444344	0.0350555	0.0597691	0.590383	0.554934	0.999995
ENSMUSG00000004895	Prcc	protein_coding	3	papillary renal cell carcinoma (translocation-associated)	PRCC	479.731	-0.056514	-0.0400915	0.067068	-0.598351	0.549606	0.999995
ENSMUSG00000004896	Rrnad1	protein_coding	3	ribosomal RNA adenine dimethylase domain containing 1	RRNAD1	399.872	-0.139952	-0.0914889	0.0704359	-1.29425	0.19558	0.999995
ENSMUSG00000004897	Hdgf	protein_coding	3	heparin binding growth factor	HDGF	1721.34	-0.0599603	-0.0483295	0.0584396	-0.827096	0.408182	0.999995
ENSMUSG00000004902	Slc25a18	protein_coding	6	solute carrier family 25 (mitochondrial carrier), member 18	SLC25A18	1200.72	0.111966	0.0929534	0.0554056	1.67919	0.0931145	0.999995
ENSMUSG00000004929	Thop1	protein_coding	10	thimet oligopeptidase 1	THOP1	594.43	-0.0487896	-0.0357681	0.0655597	-0.543908	0.586504	0.999995
ENSMUSG00000004931	Apba3	protein_coding	10	amyloid beta (A4) precursor protein-binding, family A, member 3	APBA3	333.061	-0.0898085	-0.0582574	0.0705214	-0.827271	0.408083	0.999995
ENSMUSG00000004933	Matk	protein_coding	10	megakaryocyte-associated tyrosine kinase	MATK	1047.42	-0.0396274	-0.0323025	0.0592076	-0.534935	0.592695	0.999995
ENSMUSG00000004934	Pias4	protein_coding	10	protein inhibitor of activated STAT 4	PIAS4	306.776	0.128284	0.083878	0.0703499	1.19135	0.233517	0.999995
ENSMUSG00000004936	Map2k1	protein_coding	9	mitogen-activated protein kinase kinase 1	MAP2K1	2381.99	0.0534095	0.0469307	0.0481983	0.974117	0.329999	0.999995
ENSMUSG00000004937	Sgta	protein_coding	10	small glutamine-rich tetratricopeptide repeat (TPR)-containing, alpha	SGTA	1464.15	0.0692558	0.0579346	0.0546897	1.05911	0.289552	0.999995
ENSMUSG00000004945	Tmem242	protein_coding	17	transmembrane protein 242	TMEM242	692.57	0.0730818	0.054426	0.0639697	0.857351	0.391251	0.999995
ENSMUSG00000004947	Dtx2	protein_coding	5	deltex 2, E3 ubiquitin ligase	DTX2	140.212	-0.170505	-0.0823894	0.0738793	-1.11868	0.263277	0.999995
ENSMUSG00000004951	Hspb1	protein_coding	5	heat shock protein 1	HSPB1	315.589	-0.0941975	-0.0569511	0.0727653	-0.760724	0.446822	0.999995
ENSMUSG00000004952	Rasa4	protein_coding	5	RAS p21 protein activator 4	RASA4	150.202	-0.259025	-0.12732	0.0739047	-1.72502	0.0845245	0.999995
ENSMUSG00000004961	Syt5	protein_coding	7	synaptotagmin V	SYT5	390.489	0.107607	0.0585912	0.0735084	0.808431	0.418842	0.999995
ENSMUSG00000004980	Hnrnpa2b1	protein_coding	6	heterogeneous nuclear ribonucleoprotein A2/B1	HNRNPA2B1	3600.78	-0.0555147	-0.0438446	0.0610183	-0.711621	0.476699	0.999995
ENSMUSG00000004994	Ccdc130	protein_coding	8	coiled-coil domain containing 130	CCDC130	145.221	0.0809933	0.0377274	0.0737339	0.511047	0.609318	0.999995
ENSMUSG00000004996	Mri1	protein_coding	8	methylthioribose-1-phosphate isomerase 1	MRI1	175.567	-0.332183	-0.160806	0.0738784	-2.17654	0.0295147	0.999995
ENSMUSG00000005034	Prkacb	protein_coding	3	protein kinase, cAMP dependent, catalytic, beta	PRKACB	8494.16	0.0929473	0.0844154	0.0427183	1.97572	0.0481862	0.999995
ENSMUSG00000005043	Sgsh	protein_coding	11	N-sulfoglucosamine sulfohydrolase (sulfamidase)	SGSH	275.56	-0.0187002	-0.00725182	0.0738445	-0.132054	0.894942	0.999995
ENSMUSG00000005045	Chd5	protein_coding	4	chromodomain helicase DNA binding protein 5	CHD5	2735.6	-0.0717002	-0.0567867	0.0611131	-0.916555	0.359376	0.999995
ENSMUSG00000005054	Cstb	protein_coding	10	cystatin B	CSTB	292.431	-0.107309	-0.064059	0.0721937	-0.902292	0.366902	0.999995
ENSMUSG00000005057	Sh2b2	protein_coding	5	SH2B adaptor protein 2	SH2B2	135.208	-0.213527	-0.102014	0.0738418	-1.3814	0.167156	0.999995
ENSMUSG00000005069	Pex5	protein_coding	6	peroxisomal biogenesis factor 5	PEX5	622.757	0.0183274	0.0142823	0.0613648	0.232569	0.816096	0.999995
ENSMUSG00000005078	Jkamp	protein_coding	12	JNK1/MAPK8-associated membrane protein	JKAMP	857.69	0.0474148	0.0385785	0.0575444	0.670545	0.502511	0.999995
ENSMUSG00000005087	Cd44	protein_coding	2	CD44 antigen	CD44	364.42	0.0672978	0.0385852	0.0735946	0.499617	0.617344	0.999995
ENSMUSG00000005089	Slc1a2	protein_coding	2	solute carrier family 1 (glial high affinity glutamate transporter), member 2	SLC1A2	37432.1	-0.0251032	-0.022343	0.044763	-0.503532	0.61459	0.999995
ENSMUSG00000005102	Eif2ak4	protein_coding	2	eukaryotic translation initiation factor 2 alpha kinase 4	EIF2AK4	637.091	-0.070718	-0.0527057	0.0643239	-0.820419	0.411977	0.999995
ENSMUSG00000005103	Wdr1	protein_coding	5	WD repeat domain 1	WDR1	3398.8	0.035364	0.0314353	0.0465198	0.675467	0.499379	0.999995
ENSMUSG00000005107	Slc2a9	protein_coding	5	solute carrier family 2 (facilitated glucose transporter), member 9	SLC2A9	21.8635	0.0220853	0.00243663	0.0493382	0.0571588	0.954419	0.999995
ENSMUSG00000005124	Ccn4	protein_coding	15	cellular communication network factor 4	CCN4	33.0819	-0.0850765	-0.0158372	0.05726	-0.272957	0.784887	0.999995
ENSMUSG00000005125	Ndrg1	protein_coding	15	N-myc downstream regulated gene 1	NDRG1	5823.79	-0.0570276	-0.0485407	0.0528594	-0.916465	0.359423	0.999995
ENSMUSG00000005131	4930550C14Rik	protein_coding	9	RIKEN cDNA 4930550C14 gene	C11orf65	13.8058	0.248058	0.0191312	0.0413523	0.512566	0.608255	0.999995
ENSMUSG00000005142	Man2b1	protein_coding	8	mannosidase 2, alpha B1	MAN2B1	844.251	-0.0627131	-0.0460389	0.0653164	-0.704753	0.480964	0.999995
ENSMUSG00000005148	Klf5	protein_coding	14	Kruppel-like factor 5	KLF5	21.4537	-0.674639	-0.0740008	0.0464889	-1.60064	0.109456	0.999995
ENSMUSG00000005150	Wdr83	protein_coding	8	WD repeat domain containing 83	WDR83	268.493	-0.103187	-0.0648182	0.0714512	-0.906672	0.364581	0.999995
ENSMUSG00000005161	Prdx2	protein_coding	8	peroxiredoxin 2	PRDX2	2737.3	0.0949003	0.0821178	0.0505029	1.62558	0.104039	0.999995
ENSMUSG00000005198	Polr2a	protein_coding	11	polymerase (RNA) II (DNA directed) polypeptide A	POLR2A	395.89	-0.0467886	-0.0201792	0.0737839	-0.335766	0.737048	0.999995
ENSMUSG00000005202	Shbg	protein_coding	11	sex hormone binding globulin	SHBG	12.7822	0.656168	0.0394488	0.0358038	1.1359	0.255999	0.999995
ENSMUSG00000005204	Senp3	protein_coding	11	SUMO/sentrin specific peptidase 3	SENP3	875.717	-0.0443915	-0.0355479	0.0587646	-0.606778	0.543998	0.999995
ENSMUSG00000005220	Corin	protein_coding	5	corin, serine peptidase	CORIN	11.7759	-0.202605	-0.0127831	0.0387068	-0.386298	0.699276	0.999995
ENSMUSG00000005225	Plekha8	protein_coding	6	pleckstrin homology domain containing, family A (phosphoinositide binding specific) member 8	PLEKHA8	659.68	-0.0124115	-0.00983213	0.0608524	-0.15986	0.872991	0.999995
ENSMUSG00000005233	Spc25	protein_coding	2	SPC25, NDC80 kinetochore complex component, homolog (S. cerevisiae)	SPC25	7.16197	-0.307418	-0.0150992	0.031865	-0.469907	0.638421	0.999995
ENSMUSG00000005237	Dnah2	protein_coding	11	dynein, axonemal, heavy chain 2	DNAH2	77.4864	-0.235395	-0.0811575	0.0702401	-1.15217	0.249251	0.999995
ENSMUSG00000005251	Ripk4	protein_coding	16	receptor-interacting serine-threonine kinase 4	RIPK4	15.1742	0.345104	0.0310737	0.0419069	0.724502	0.468758	0.999995
ENSMUSG00000005262	Ufd1	protein_coding	16	ubiquitin recognition factor in ER-associated degradation 1	UFD1	966.172	0.0347107	0.0283774	0.0580295	0.484299	0.628174	0.999995
ENSMUSG00000005267	Zfp287	protein_coding	11	zinc finger protein 287	ZNF287	386.818	0.0379612	0.025618	0.0700414	0.357542	0.720686	0.999995
ENSMUSG00000005268	Prlr	protein_coding	15	prolactin receptor	PRLR	245.088	-0.0306281	-0.0181175	0.0727157	-0.248278	0.803919	0.999995
ENSMUSG00000005299	Letm1	protein_coding	5	leucine zipper-EF-hand containing transmembrane protein 1	LETM1	1394.34	0.0722956	0.0618532	0.0519587	1.1905	0.233849	0.999995
ENSMUSG00000005312	Ubqln1	protein_coding	13	ubiquilin 1	UBQLN1	3953.48	0.0062804	0.00569792	0.0434009	0.13092	0.895839	0.999995
ENSMUSG00000005320	Fgfr4	protein_coding	13	fibroblast growth factor receptor 4	FGFR4	9.74435	0.130755	0.00891792	0.0321898	0.202238	0.839731	0.999995
ENSMUSG00000005338	Cadm3	protein_coding	1	cell adhesion molecule 3	CADM3	3793.19	-0.111444	-0.0935321	0.0544352	-1.71607	0.0861488	0.999995
ENSMUSG00000005354	Txn2	protein_coding	15	thioredoxin 2	TXN2	872.006	-0.0293563	-0.0218534	0.0651242	-0.331974	0.739909	0.999995
ENSMUSG00000005357	Slc1a6	protein_coding	10	solute carrier family 1 (high affinity aspartate/glutamate transporter), member 6	SLC1A6	203.777	-0.00749283	-0.00422294	0.0733272	-0.0575063	0.954142	0.999995
ENSMUSG00000005360	Slc1a3	protein_coding	15	solute carrier family 1 (glial high affinity glutamate transporter), member 3	SLC1A3	2402.81	0.0712295	0.0584071	0.0558612	1.05505	0.291403	0.999995
ENSMUSG00000005362	Crbn	protein_coding	6	cereblon	CRBN	1525.11	0.049581	0.0402319	0.057876	0.694762	0.487204	0.999995
ENSMUSG00000005370	Msh6	protein_coding	17	mutS homolog 6	MSH6	685.857	-0.0240379	-0.0188193	0.0616707	-0.302301	0.762422	0.999995
ENSMUSG00000005371	Fbxo11	protein_coding	17	F-box protein 11	FBXO11	1132.27	0.0305019	0.0256377	0.0544282	0.469765	0.638523	0.999995
ENSMUSG00000005373	Mlxipl	protein_coding	5	MLX interacting protein-like	MLXIPL	35.9544	-0.531745	-0.102126	0.0580742	-1.73537	0.0826748	0.999995
ENSMUSG00000005374	Tbl2	protein_coding	5	transducin (beta)-like 2	TBL2	502.654	0.12082	0.0870117	0.066409	1.30901	0.190533	0.999995
ENSMUSG00000005378	Bud23	protein_coding	5	BUD23, rRNA methyltransferase and ribosome maturation factor	BUD23	312.64	0.0113569	0.00723226	0.0707317	0.103578	0.917504	0.999995
ENSMUSG00000005397	Nid1	protein_coding	13	nidogen 1	NID1	459.296	-0.209524	-0.142439	0.0689562	-2.06514	0.0389098	0.999995
ENSMUSG00000005410	Mcm5	protein_coding	8	minichromosome maintenance complex component 5	MCM5	66.2423	0.0402977	0.0123797	0.0668839	0.172981	0.862666	0.999995
ENSMUSG00000005413	Hmox1	protein_coding	8	heme oxygenase 1	HMOX1	83.5524	0.0959801	0.028185	0.0683565	0.434992	0.663568	0.999995
ENSMUSG00000005417	Mprip	protein_coding	11	myosin phosphatase Rho interacting protein	MPRIP	6655.61	-0.0216668	-0.0190133	0.0472417	-0.405683	0.684976	0.999995
ENSMUSG00000005442	Cic	protein_coding	7	capicua transcriptional repressor	CIC	978.087	-0.106987	-0.0782813	0.0655656	-1.19246	0.233081	0.999995
ENSMUSG00000005447	Pafah1b3	protein_coding	7	platelet-activating factor acetylhydrolase, isoform 1b, subunit 3	PAFAH1B3	257.96	0.154361	0.0916577	0.0726974	1.25331	0.210093	0.999995
ENSMUSG00000005465	Il27ra	protein_coding	8	interleukin 27 receptor, alpha	IL27RA	10.0845	-0.0671696	-0.0043169	0.0373742	-0.123183	0.901962	0.999995
ENSMUSG00000005469	Prkaca	protein_coding	8	protein kinase, cAMP dependent, catalytic, alpha	PRKACA	3390.26	-0.0904421	-0.0764986	0.0532791	-1.43702	0.150713	0.999995
ENSMUSG00000005470	Asf1b	protein_coding	8	anti-silencing function 1B histone chaperone	ASF1B	10.6393	-0.138673	-0.0110515	0.0388524	-0.265802	0.790392	0.999995
ENSMUSG00000005481	Ddx39	protein_coding	8	DEAD (Asp-Glu-Ala-Asp) box polypeptide 39		222.829	0.0186165	0.0104786	0.0734613	0.140682	0.888121	0.999995
ENSMUSG00000005483	Dnajb1	protein_coding	8	DnaJ heat shock protein family (Hsp40) member B1	DNAJB1	841.197	0.0489924	0.0391878	0.0589946	0.665377	0.50581	0.999995
ENSMUSG00000005493	Msh4	protein_coding	3	mutS homolog 4	MSH4	10.458	-0.772267	-0.0482696	0.036692	-1.36978	0.170757	0.999995
ENSMUSG00000005501	Usp40	protein_coding	1	ubiquitin specific peptidase 40	USP40	520.53	-0.0202866	-0.0144888	0.0655869	-0.225951	0.821239	0.999995
ENSMUSG00000005503	Evx1	protein_coding	6	even-skipped homeobox 1	EVX1	14.5578	0.14247	0.0144744	0.042636	0.304715	0.760583	0.999995
ENSMUSG00000005505	Kbtbd4	protein_coding	2	kelch repeat and BTB (POZ) domain containing 4	KBTBD4	480.049	-0.0949868	-0.0684631	0.066331	-1.03175	0.30219	0.999995
ENSMUSG00000005506	Celf1	protein_coding	2	CUGBP, Elav-like family member 1	CELF1	1385.41	0.0424209	0.0356474	0.0541677	0.65799	0.510545	0.999995
ENSMUSG00000005510	Ndufs3	protein_coding	2	NADH:ubiquinone oxidoreductase core subunit S3	NDUFS3	1264.75	0.139978	0.116577	0.0550994	2.11687	0.0342706	0.999995
ENSMUSG00000005514	Por	protein_coding	5	P450 (cytochrome) oxidoreductase	POR	938.666	-0.00773928	-0.00600942	0.0593659	-0.104013	0.917159	0.999995
ENSMUSG00000005533	Igf1r	protein_coding	7	insulin-like growth factor I receptor	IGF1R	1267.45	0.0237686	0.0192743	0.0582807	0.329328	0.741908	0.999995
ENSMUSG00000005534	Insr	protein_coding	8	insulin receptor	INSR	1231.52	-0.014399	-0.0111787	0.0618091	-0.180352	0.856876	0.999995
ENSMUSG00000005553	Atp4a	protein_coding	7	ATPase, H+/K+ exchanging, gastric, alpha polypeptide	ATP4A	8.81127	0.443792	0.0255072	0.0345999	0.744194	0.456759	0.999995
ENSMUSG00000005566	Trim28	protein_coding	7	tripartite motif-containing 28	TRIM28	1583.57	-0.0464492	-0.0396477	0.0522715	-0.758422	0.448198	0.999995
ENSMUSG00000005575	Ube2m	protein_coding	7	ubiquitin-conjugating enzyme E2M	UBE2M	1691.34	-0.0486716	-0.0384581	0.0594355	-0.652837	0.513861	0.999995
ENSMUSG00000005580	Adcy9	protein_coding	16	adenylate cyclase 9	ADCY9	1387.85	-0.0265493	-0.0218516	0.056178	-0.389851	0.696647	0.999995
ENSMUSG00000005583	Mef2c	protein_coding	13	myocyte enhancer factor 2C	MEF2C	526.924	-0.00440396	-0.00335236	0.0646187	-0.0506185	0.95963	0.999995
ENSMUSG00000005609	Ctr9	protein_coding	7	CTR9 homolog, Paf1/RNA polymerase II complex component	CTR9	1637.46	-0.0365888	-0.0316897	0.0503689	-0.629014	0.52934	0.999995
ENSMUSG00000005610	Eif4g2	protein_coding	7	eukaryotic translation initiation factor 4, gamma 2	EIF4G2	8950.43	-0.000501108	-0.000545673	0.0437831	-0.0103332	0.991755	0.999995
ENSMUSG00000005611	Mrvi1	protein_coding	7	MRV integration site 1		175.344	-0.0582362	-0.0293704	0.0739077	-0.398448	0.6903	0.999995
ENSMUSG00000005615	Pcyt1a	protein_coding	16	phosphate cytidylyltransferase 1, choline, alpha isoform	PCYT1A	1523.35	-0.0297223	-0.0254123	0.0527676	-0.478835	0.632056	0.999995
ENSMUSG00000005621	Zfp592	protein_coding	7	zinc finger protein 592	ZNF592	464.755	-0.0460309	-0.032476	0.0672824	-0.483651	0.628634	0.999995
ENSMUSG00000005625	Psmd4	protein_coding	3	proteasome (prosome, macropain) 26S subunit, non-ATPase, 4	PSMD4	2001.93	0.020918	0.018057	0.0504219	0.359099	0.719521	0.999995
ENSMUSG00000005628	Tmod4	protein_coding	3	tropomodulin 4	TMOD4	8.41607	-0.414734	-0.0260378	0.0330072	-0.654973	0.512485	0.999995
ENSMUSG00000005640	Insrr	protein_coding	3	insulin receptor-related receptor	INSRR	1.89881	-1.40163	-0.0131385	0.0147849	-0.924792	0.355074	0.999995
ENSMUSG00000005656	Snx6	protein_coding	12	sorting nexin 6	SNX6	813.042	-0.0353671	-0.0282804	0.0591819	-0.477788	0.632801	0.999995
ENSMUSG00000005667	Mthfd2	protein_coding	6	methylenetetrahydrofolate dehydrogenase (NAD+ dependent), methenyltetrahydrofolate cyclohydrolase	MTHFD2	427.887	-0.0184221	-0.0134587	0.0709156	-0.166493	0.867769	0.999995
ENSMUSG00000005672	Kit	protein_coding	5	KIT proto-oncogene receptor tyrosine kinase	KIT	350.387	0.0409157	0.0225233	0.0732388	0.316976	0.751262	0.999995
ENSMUSG00000005674	Tomm40l	protein_coding	1	translocase of outer mitochondrial membrane 40-like	TOMM40L	1014.05	0.123362	0.0991742	0.0585085	1.6984	0.0894327	0.999995
ENSMUSG00000005677	Nr1i3	protein_coding	1	nuclear receptor subfamily 1, group I, member 3	NR1I3	10.1398	0.960085	0.0546016	0.034926	1.60944	0.107521	0.999995
ENSMUSG00000005681	Apoa2	protein_coding	1	apolipoprotein A-II	APOA2	5.84272	0.678086	0.0221745	0.0239008	0.754754	0.450397	0.999995
ENSMUSG00000005682	Pan2	protein_coding	10	PAN2 poly(A) specific ribonuclease subunit	PAN2	327.465	-0.144862	-0.084678	0.0730134	-1.14589	0.251839	0.999995
ENSMUSG00000005683	Cs	protein_coding	10	citrate synthase	CS	5088.01	0.0870067	0.077786	0.0455289	1.70823	0.0875943	0.999995
ENSMUSG00000005686	Ampd3	protein_coding	7	adenosine monophosphate deaminase 3	AMPD3	462.397	-0.00807769	-0.00554476	0.0671815	-0.0851795	0.932119	0.999995
ENSMUSG00000005687	Bcas2	protein_coding	3	breast carcinoma amplified sequence 2	BCAS2	655.715	0.111711	0.0851303	0.0632221	1.34115	0.179873	0.999995
ENSMUSG00000005698	Ctcf	protein_coding	8	CCCTC-binding factor	CTCF	1076.8	0.0224447	0.0186303	0.0563088	0.328401	0.742608	0.999995
ENSMUSG00000005699	Pard6a	protein_coding	8	par-6 family cell polarity regulator alpha	PARD6A	320.721	-0.0864015	-0.0571346	0.0700359	-0.813817	0.41575	0.999995
ENSMUSG00000005716	Pvalb	protein_coding	15	parvalbumin	PVALB	1545.28	-0.0611395	-0.0470782	0.0624375	-0.751562	0.452315	0.999995
ENSMUSG00000005718	Tfap4	protein_coding	16	transcription factor AP4	TFAP4	65.4911	0.193688	0.0572411	0.0681473	0.870322	0.384125	0.999995
ENSMUSG00000005732	Ranbp1	protein_coding	16	RAN binding protein 1	RANBP1	698.854	-0.0373188	-0.0283381	0.0631325	-0.449246	0.653254	0.999995
ENSMUSG00000005774	Rfx5	protein_coding	3	regulatory factor X, 5 (influences HLA class II expression)	RFX5	536.032	-0.0988517	-0.0698559	0.067096	-1.04545	0.295814	0.999995
ENSMUSG00000005779	Psmb4	protein_coding	3	proteasome (prosome, macropain) subunit, beta type 4	PSMB4	1925.13	0.090076	0.0741468	0.056419	1.31399	0.18885	0.999995
ENSMUSG00000005800	Mmp8	protein_coding	9	matrix metallopeptidase 8	MMP8	0.542345	-2.34722	-0.00785521	0.00778644	-0.852868	0.393732	0.999995
ENSMUSG00000005802	Slc30a4	protein_coding	2	solute carrier family 30 (zinc transporter), member 4	SLC30A4	1072.68	0.0636199	0.050481	0.0599619	0.840692	0.40052	0.999995
ENSMUSG00000005803	Sqor	protein_coding	2	sulfide quinone oxidoreductase	SQOR	152.263	-0.0224024	-0.00995696	0.0738008	-0.1433	0.886053	0.999995
ENSMUSG00000005804	Bloc1s6	protein_coding	2	biogenesis of lysosomal organelles complex-1, subunit 6, pallidin	BLOC1S6	455.993	0.168674	0.110028	0.0703183	1.56877	0.116701	0.999995
ENSMUSG00000005813	Metap1	protein_coding	3	methionyl aminopeptidase 1	METAP1	942.993	0.0922915	0.0737597	0.0590595	1.25115	0.21088	0.999995
ENSMUSG00000005823	Gpr108	protein_coding	17	G protein-coupled receptor 108	GPR108	520.863	-0.053339	-0.0393696	0.0649412	-0.606737	0.544025	0.999995
ENSMUSG00000005846	Rsl1d1	protein_coding	16	ribosomal L1 domain containing 1	RSL1D1	800.481	-0.0506971	-0.037299	0.066212	-0.552962	0.58029	0.999995
ENSMUSG00000005871	Apc	protein_coding	18	APC, WNT signaling pathway regulator	APC	7910.31	-0.0343347	-0.0311463	0.0428995	-0.726049	0.467809	0.999995
ENSMUSG00000005873	Reep5	protein_coding	18	receptor accessory protein 5	REEP5	4410.05	0.103445	0.0924435	0.0454906	2.03314	0.0420383	0.999995
ENSMUSG00000005881	Ergic3	protein_coding	2	ERGIC and golgi 3	ERGIC3	1326.71	0.0225276	0.0190144	0.0542693	0.348462	0.727493	0.999995
ENSMUSG00000005886	Ncoa2	protein_coding	1	nuclear receptor coactivator 2	NCOA2	1570.92	-0.0559646	-0.0444726	0.0595877	-0.747429	0.454804	0.999995
ENSMUSG00000005892	Trh	protein_coding	6	thyrotropin releasing hormone	TRH	44.1084	-0.650263	-0.119835	0.0569734	-2.05683	0.0397027	0.999995
ENSMUSG00000005893	Nr2c2	protein_coding	6	nuclear receptor subfamily 2, group C, member 2	NR2C2	2174.93	0.0302813	0.0264056	0.0493702	0.534907	0.592714	0.999995
ENSMUSG00000005897	Nr2c1	protein_coding	10	nuclear receptor subfamily 2, group C, member 1	NR2C1	194.951	0.00987029	0.00570817	0.0737638	0.0711372	0.943289	0.999995
ENSMUSG00000005899	Smpd4	protein_coding	16	sphingomyelin phosphodiesterase 4	SMPD4	606.514	0.0392812	0.0258501	0.0692286	0.383095	0.70165	0.999995
ENSMUSG00000005907	Pex1	protein_coding	5	peroxisomal biogenesis factor 1	PEX1	441.473	-0.00527861	-0.0031826	0.0681643	-0.0536871	0.957184	0.999995
ENSMUSG00000005936	Kctd20	protein_coding	17	potassium channel tetramerisation domain containing 20	KCTD20	1066.46	-0.029412	-0.0236107	0.0588567	-0.400998	0.688422	0.999995
ENSMUSG00000005947	Itgae	protein_coding	11	integrin alpha E, epithelial-associated	ITGAE	19.3083	0.0084616	0.000664899	0.0477004	0.0209308	0.983301	0.999995
ENSMUSG00000005949	Ctns	protein_coding	11	cystinosis, nephropathic	CTNS	258.057	0.104894	0.0637085	0.0723464	0.873356	0.382469	0.999995
ENSMUSG00000005950	P2rx5	protein_coding	11	purinergic receptor P2X, ligand-gated ion channel, 5	P2RX5	364.101	0.0235795	0.0137271	0.0729084	0.188277	0.85066	0.999995
ENSMUSG00000005951	Shpk	protein_coding	11	sedoheptulokinase	SHPK	75.7815	0.116994	0.0389473	0.0696399	0.55854	0.576476	0.999995
ENSMUSG00000005958	Ephb3	protein_coding	16	Eph receptor B3	EPHB3	117.842	-0.0315981	-0.0162161	0.0733733	-0.189279	0.849874	0.999995
ENSMUSG00000005968	Tuft1	protein_coding	3	tuftelin 1	TUFT1	88.8129	0.0211392	0.00719202	0.0710005	0.107489	0.914401	0.999995
ENSMUSG00000005973	Rcn1	protein_coding	2	reticulocalbin 1	RCN1	326.165	-0.0300922	-0.0185806	0.0715977	-0.262315	0.793078	0.999995
ENSMUSG00000005981	Trap1	protein_coding	16	TNF receptor-associated protein 1	TRAP1	1533.21	-0.0766236	-0.0644865	0.0535919	-1.20715	0.227374	0.999995
ENSMUSG00000005982	Naa60	protein_coding	16	N(alpha)-acetyltransferase 60, NatF catalytic subunit	NAA60	868.865	0.00637661	0.00502575	0.0603631	0.0832997	0.933613	0.999995
ENSMUSG00000005983	1700037C18Rik	protein_coding	16	RIKEN cDNA 1700037C18 gene	C16orf90	57.7982	0.217589	0.0562396	0.0646572	0.867124	0.385874	0.999995
ENSMUSG00000005986	Ankrd13d	protein_coding	19	ankyrin repeat domain 13 family, member D	ANKRD13D	860.965	-0.0372088	-0.0299469	0.0585177	-0.512125	0.608563	0.999995
ENSMUSG00000006005	Tpr	protein_coding	1	translocated promoter region, nuclear basket protein	TPR	3629.45	-0.0118593	-0.0107064	0.0460299	-0.229614	0.818392	0.999995
ENSMUSG00000006010	Odr4	protein_coding	1	odr4 GPCR localization factor homolog	ODR4	1319.4	0.0246746	0.0195606	0.057984	0.344717	0.730307	0.999995
ENSMUSG00000006014	Prg4	protein_coding	1	proteoglycan 4 (megakaryocyte stimulating factor, articular superficial zone protein)	PRG4	7.71547	-3.81903	-0.018365	0.0121231	-1.94435	0.0518538	0.999995
ENSMUSG00000006019	Dhx34	protein_coding	7	DEAH (Asp-Glu-Ala-His) box polypeptide 34	DHX34	218.432	0.00293011	0.00102598	0.0734478	0.0221789	0.982305	0.999995
ENSMUSG00000006021	Kptn	protein_coding	7	kaptin	KPTN	215.976	0.116447	0.0528545	0.0735177	0.710152	0.47761	0.999995
ENSMUSG00000006024	Napa	protein_coding	7	N-ethylmaleimide sensitive fusion protein attachment protein alpha	NAPA	3168.75	0.0999645	0.0880623	0.0480085	1.83271	0.0668451	0.999995
ENSMUSG00000006050	Sra1	protein_coding	18	steroid receptor RNA activator 1	SRA1	358.458	-0.0533713	-0.0341094	0.071086	-0.478185	0.632519	0.999995
ENSMUSG00000006057	Atp5g1	protein_coding	11	ATP synthase, H+ transporting, mitochondrial F0 complex, subunit C1 (subunit 9)	ATP5MC1	2689.75	0.0978617	0.0824591	0.0540251	1.52381	0.127556	0.999995
ENSMUSG00000006058	Snf8	protein_coding	11	SNF8, ESCRT-II complex subunit, homolog (S. cerevisiae)	SNF8	609.877	-0.00623879	-0.00498993	0.0635526	-0.0741434	0.940896	0.999995
ENSMUSG00000006095	Tbcb	protein_coding	7	tubulin folding cofactor B	TBCB	1108.11	0.0218167	0.0161142	0.0654817	0.243854	0.807344	0.999995
ENSMUSG00000006127	Inpp5k	protein_coding	11	inositol polyphosphate 5-phosphatase K	INPP5K	726.75	-0.0259725	-0.0203609	0.0607643	-0.335382	0.737337	0.999995
ENSMUSG00000006134	Crkl	protein_coding	16	v-crk avian sarcoma virus CT10 oncogene homolog-like	CRKL	1560.08	0.0493785	0.0414478	0.0541801	0.765647	0.443886	0.999995
ENSMUSG00000006143	Upk3bl	protein_coding	5	uroplakin 3B-like	UPK3BL1	7.46252	0.506324	0.0180866	0.0288081	0.691851	0.489031	0.999995
ENSMUSG00000006154	Eps8l1	protein_coding	7	EPS8-like 1	EPS8L1	98.0508	0.00743512	0.0165159	0.0212775	0.00738625	0.994107	0.999995
ENSMUSG00000006169	Clint1	protein_coding	11	clathrin interactor 1	CLINT1	1068.19	0.0394003	0.0319502	0.0567971	0.568807	0.569487	0.999995
ENSMUSG00000006191	Cdkal1	protein_coding	13	CDK5 regulatory subunit associated protein 1-like 1	CDKAL1	411.81	-0.123617	-0.088202	0.0669527	-1.31393	0.188868	0.999995
ENSMUSG00000006204	Cdcp3	protein_coding	7	CUB domain containing protein 3	DMBT1L1	3.89157	0.46036	0.00442329	0.0228591	0.489556	0.624448	0.999995
ENSMUSG00000006205	Htra1	protein_coding	7	HtrA serine peptidase 1	HTRA1	3508.79	0.088094	0.0658444	0.0611598	1.12457	0.260769	0.999995
ENSMUSG00000006215	Zbtb17	protein_coding	4	zinc finger and BTB domain containing 17	ZBTB17	468.407	-0.184561	-0.126667	0.0685954	-1.84578	0.0649248	0.999995
ENSMUSG00000006218	Fam131c	protein_coding	4	family with sequence similarity 131, member C	FAM131C	133.731	-0.167617	-0.0738204	0.0733014	-0.995984	0.319258	0.999995
ENSMUSG00000006219	Fblim1	protein_coding	4	filamin binding LIM protein 1	FBLIM1	17.5928	0.267186	0.0284123	0.0451707	0.60681	0.543977	0.999995
ENSMUSG00000006221	Hspb7	protein_coding	4	heat shock protein family, member 7 (cardiovascular)	HSPB7	4.39754	-1.44646	-0.0416698	0.0256311	-1.66512	0.0958884	0.999995
ENSMUSG00000006235	Epor	protein_coding	9	erythropoietin receptor	EPOR	33.1723	0.20779	0.034588	0.0555245	0.63586	0.524868	0.999995
ENSMUSG00000006241	Ccdc159	protein_coding	9	coiled-coil domain containing 159	CCDC159	90.6654	0.0528156	0.021541	0.0718387	0.281104	0.778631	0.999995
ENSMUSG00000006262	Mob1b	protein_coding	5	MOB kinase activator 1B	MOB1B	439.175	-0.0539209	-0.0380041	0.0667123	-0.578052	0.563229	0.999995
ENSMUSG00000006273	Atp6v1b2	protein_coding	8	ATPase, H+ transporting, lysosomal V1 subunit B2	ATP6V1B2	9919.68	0.0585176	0.0522553	0.0457472	1.14193	0.253483	0.999995
ENSMUSG00000006276	Eps15l1	protein_coding	8	epidermal growth factor receptor pathway substrate 15-like 1	EPS15L1	1105.44	-0.0874419	-0.0679999	0.0613581	-1.10978	0.267094	0.999995
ENSMUSG00000006281	Tep1	protein_coding	14	telomerase associated protein 1	TEP1	204.092	-0.21105	-0.114954	0.0736051	-1.5632	0.118005	0.999995
ENSMUSG00000006288	Ttc5	protein_coding	14	tetratricopeptide repeat domain 5	TTC5	509.153	0.0848435	0.0625833	0.0648803	0.967039	0.333525	0.999995
ENSMUSG00000006289	Osgep	protein_coding	14	O-sialoglycoprotein endopeptidase	OSGEP	327.552	0.0832913	0.0543339	0.0703026	0.775246	0.438194	0.999995
ENSMUSG00000006299	Aamp	protein_coding	1	angio-associated migratory protein	AAMP	2347.21	-0.0251642	-0.020891	0.0552198	-0.379314	0.704455	0.999995
ENSMUSG00000006301	Tmbim1	protein_coding	1	transmembrane BAX inhibitor motif containing 1	TMBIM1	1777.48	0.0566013	0.0474437	0.0537514	0.887894	0.374598	0.999995
ENSMUSG00000006304	Arpc2	protein_coding	1	actin related protein 2/3 complex, subunit 2	ARPC2	1312.03	0.0372084	0.0306357	0.0560935	0.547643	0.583937	0.999995
ENSMUSG00000006307	Kmt2b	protein_coding	7	lysine (K)-specific methyltransferase 2B	KMT2B	394.59	-0.256295	-0.160161	0.0715577	-2.23813	0.0252123	0.999995
ENSMUSG00000006313	Upk1a	protein_coding	7	uroplakin 1A	UPK1A	5.02184	-1.44141	-0.0464551	0.0269009	-1.74702	0.0806345	0.999995
ENSMUSG00000006315	Tmem147	protein_coding	7	transmembrane protein 147	TMEM147	1004.5	0.0593039	0.045766	0.0625657	0.726267	0.467675	0.999995
ENSMUSG00000006333	Rps9	protein_coding	7	ribosomal protein S9	RPS9	2892.37	0.0435316	0.0376962	0.0504275	0.747192	0.454948	0.999995
ENSMUSG00000006335	Tfpt	protein_coding	7	TCF3 (E2A) fusion partner	TFPT	249.174	0.0288603	0.0174266	0.0722515	0.241813	0.808925	0.999995
ENSMUSG00000006342	Susd2	protein_coding	10	sushi domain containing 2	SUSD2	1066.27	-0.0348946	-0.0243739	0.0684938	-0.350461	0.725993	0.999995
ENSMUSG00000006344	Ggt5	protein_coding	10	gamma-glutamyltransferase 5	GGT5	83.565	0.222373	0.065058	0.0677907	0.98537	0.324442	0.999995
ENSMUSG00000006345	Ggt1	protein_coding	10	gamma-glutamyltransferase 1	GGT1	41.8622	-0.00423566	0.00118369	0.0617725	-0.0154399	0.987681	0.999995
ENSMUSG00000006356	Crip2	protein_coding	12	cysteine rich protein 2	CRIP2	494.482	-0.0767336	-0.0562168	0.0655824	-0.854726	0.392703	0.999995
ENSMUSG00000006360	Crip1	protein_coding	12	cysteine-rich protein 1 (intestinal)	CRIP1	83.8028	-0.194341	-0.068705	0.0693296	-0.9141	0.360664	0.999995
ENSMUSG00000006362	Cbfa2t3	protein_coding	8	CBFA2/RUNX1 translocation partner 3	CBFA2T3	33.4991	-0.295097	-0.0560528	0.0580761	-0.966609	0.333739	0.999995
ENSMUSG00000006369	Fbln1	protein_coding	15	fibulin 1	FBLN1	149.379	-0.305761	-0.117711	0.0710594	-1.55687	0.1195	0.999995
ENSMUSG00000006373	Pgrmc1	protein_coding	X	progesterone receptor membrane component 1	PGRMC1	2251.56	0.0932658	0.0744817	0.0593153	1.25527	0.20938	0.999995
ENSMUSG00000006378	Gcat	protein_coding	15	glycine C-acetyltransferase (2-amino-3-ketobutyrate-coenzyme A ligase)	GCAT	60.5604	0.133872	0.0381506	0.0667145	0.571421	0.567714	0.999995
ENSMUSG00000006386	Tek	protein_coding	4	TEK receptor tyrosine kinase	TEK	360.902	-0.0582206	-0.0379518	0.0704331	-0.538581	0.590176	0.999995
ENSMUSG00000006389	Mpl	protein_coding	4	myeloproliferative leukemia virus oncogene	MPL	0.984737	-3.31657	-0.0176709	0.011581	-1.70901	0.0874492	0.999995
ENSMUSG00000006390	Elovl1	protein_coding	4	elongation of very long chain fatty acids (FEN1/Elo2, SUR4/Elo3, yeast)-like 1	ELOVL1	566.093	0.0450376	0.0331596	0.0652067	0.507954	0.611485	0.999995
ENSMUSG00000006395	Hyi	polymorphic_pseudogene	4	hydroxypyruvate isomerase (putative)	HYI	140.047	-0.267275	-0.109472	0.0723573	-1.46719	0.142325	0.999995
ENSMUSG00000006398	Cdc20	protein_coding	4	cell division cycle 20	CDC20	15.6641	0.560238	0.0553301	0.0445018	1.26327	0.20649	0.999995
ENSMUSG00000006403	Adamts4	protein_coding	1	a disintegrin-like and metallopeptidase (reprolysin type) with thrombospondin type 1 motif, 4	ADAMTS4	1817.7	0.0370514	0.0275346	0.0647059	0.424693	0.671061	0.999995
ENSMUSG00000006411	Nectin4	protein_coding	1	nectin cell adhesion molecule 4	NECTIN4	282.501	0.144999	0.0907649	0.0715435	1.26783	0.20486	0.999995
ENSMUSG00000006412	Pfdn2	protein_coding	1	prefoldin 2	PFDN2	661.689	0.0466816	0.0261122	0.0711727	0.416399	0.677118	0.999995
ENSMUSG00000006418	Rnf114	protein_coding	2	ring finger protein 114	RNF114	943.573	0.0246611	0.0199705	0.0582667	0.341827	0.732481	0.999995
ENSMUSG00000006423	C330007P06Rik	protein_coding	X	RIKEN cDNA C330007P06 gene	CXorf56	1162.88	0.0253756	0.0199955	0.0597343	0.3375	0.73574	0.999995
ENSMUSG00000006435	Neurl1a	protein_coding	19	neuralized E3 ubiquitin protein ligase 1A	NEURL1	749.776	0.0520779	0.0333907	0.0711364	0.465422	0.641629	0.999995
ENSMUSG00000006442	Srm	protein_coding	4	spermidine synthase	SRM	442.01	0.0201042	0.0131887	0.0703789	0.186465	0.85208	0.999995
ENSMUSG00000006445	Epha2	protein_coding	4	Eph receptor A2	EPHA2	31.6639	0.450062	0.064135	0.0513266	1.22694	0.219846	0.999995
ENSMUSG00000006456	Rbm14	protein_coding	19	RNA binding motif protein 14	RBM14	406.032	-0.0980225	-0.0646422	0.0700961	-0.92085	0.357129	0.999995
ENSMUSG00000006457	Actn3	protein_coding	19	actinin alpha 3	ACTN3	25.4105	-1.07733	-0.106576	0.0437099	-2.3314	0.019732	0.999995
ENSMUSG00000006462	A530013C23Rik	lincRNA	2	RIKEN cDNA A530013C23 gene		2.68163	-0.5332	-0.00771184	0.0203889	-0.495176	0.620476	0.999995
ENSMUSG00000006463	Zdhhc24	protein_coding	19	zinc finger, DHHC domain containing 24	ZDHHC24	356.587	0.143105	0.0960298	0.0694133	1.38494	0.166072	0.999995
ENSMUSG00000006464	Bbs1	protein_coding	19	Bardet-Biedl syndrome 1 (human)	BBS1	453.443	0.0343912	0.023103	0.0688657	0.340375	0.733574	0.999995
ENSMUSG00000006469	Slc34a3	protein_coding	2	solute carrier family 34 (sodium phosphate), member 3	SLC34A3	47.3937	-0.120262	-0.0287728	0.0622285	-0.444588	0.656618	0.999995
ENSMUSG00000006471	Ndor1	protein_coding	2	NADPH dependent diflavin oxidoreductase 1	NDOR1	199.595	-0.0144998	-0.00763546	0.0731237	-0.113569	0.90958	0.999995
ENSMUSG00000006476	Nsmf	protein_coding	2	NMDA receptor synaptonuclear signaling and neuronal migration factor	NSMF	2984.97	0.0204886	0.0180427	0.0483803	0.371827	0.710022	0.999995
ENSMUSG00000006494	Pdk1	protein_coding	2	pyruvate dehydrogenase kinase, isoenzyme 1	PDK1	830.477	0.00248354	0.00200656	0.0587883	0.0339253	0.972937	0.999995
ENSMUSG00000006498	Ptbp1	protein_coding	10	polypyrimidine tract binding protein 1	PTBP1	462.181	0.0810448	0.0577558	0.0669287	0.862375	0.388481	0.999995
ENSMUSG00000006517	Mvd	protein_coding	8	mevalonate (diphospho) decarboxylase	MVD	480.323	0.230077	0.162493	0.0673191	2.41408	0.0157749	0.999995
ENSMUSG00000006519	Cyba	protein_coding	8	cytochrome b-245, alpha polypeptide	CYBA	64.037	-0.161046	-0.0476496	0.067445	-0.704762	0.480959	0.999995
ENSMUSG00000006522	Itih3	protein_coding	14	inter-alpha trypsin inhibitor, heavy chain 3	ITIH3	4454.11	-0.0134774	-0.0110561	0.0559109	-0.199357	0.841983	0.999995
ENSMUSG00000006526	Stimate	protein_coding	14	STIM activating enhancer	STIMATE	469.371	-0.0103756	-0.00723363	0.0679771	-0.106279	0.915361	0.999995
ENSMUSG00000006527	Sfmbt1	protein_coding	14	Scm-like with four mbt domains 1	SFMBT1	578.569	-0.0744046	-0.0533955	0.0663926	-0.806526	0.41994	0.999995
ENSMUSG00000006538	Ihh	protein_coding	1	Indian hedgehog	IHH	6.26635	-0.844772	-0.0359964	0.0298479	-1.17644	0.239418	0.999995
ENSMUSG00000006542	Prkag3	protein_coding	1	protein kinase, AMP-activated, gamma 3 non-catalytic subunit	PRKAG3	15.364	-0.132942	-0.0130491	0.0436395	-0.293583	0.769077	0.999995
ENSMUSG00000006546	Cryba2	protein_coding	1	crystallin, beta A2	CRYBA2	19.6347	0.163478	0.0193699	0.0473681	0.400893	0.688499	0.999995
ENSMUSG00000006567	Atp7b	protein_coding	8	ATPase, Cu++ transporting, beta polypeptide	ATP7B	136.805	-0.043611	-0.0176983	0.0734973	-0.265194	0.79086	0.999995
ENSMUSG00000006574	Slc4a1	protein_coding	11	solute carrier family 4 (anion exchanger), member 1	SLC4A1	8.00157	-0.301981	-0.024772	0.0314691	-0.446188	0.655462	0.999995
ENSMUSG00000006575	Rundc3a	protein_coding	11	RUN domain containing 3A	RUNDC3A	3082.28	0.0339649	0.0291903	0.0513976	0.567864	0.570127	0.999995
ENSMUSG00000006576	Slc4a3	protein_coding	1	solute carrier family 4 (anion exchanger), member 3	SLC4A3	2424.54	-0.0874543	-0.0728654	0.0552246	-1.31805	0.187486	0.999995
ENSMUSG00000006585	Cdt1	protein_coding	8	chromatin licensing and DNA replication factor 1	CDT1	28.0738	0.123738	0.0195029	0.0533914	0.357422	0.720776	0.999995
ENSMUSG00000006586	Runx1t1	protein_coding	4	RUNX1 translocation partner 1	RUNX1T1	444.966	-0.103621	-0.0725403	0.0677744	-1.0693	0.284935	0.999995
ENSMUSG00000006589	Aprt	protein_coding	8	adenine phosphoribosyl transferase	APRT	204.159	-0.1387	-0.079557	0.0731793	-1.08033	0.279994	0.999995
ENSMUSG00000006599	Gtf2h1	protein_coding	7	general transcription factor II H, polypeptide 1	GTF2H1	610.606	0.0135742	0.0100403	0.0645188	0.156519	0.875624	0.999995
ENSMUSG00000006611	Hfe	protein_coding	13	homeostatic iron regulator	HFE	117.388	0.305016	0.122131	0.0724274	1.6847	0.0920462	0.999995
ENSMUSG00000006638	Abhd1	polymorphic_pseudogene	5	abhydrolase domain containing 1	ABHD1	55.828	-0.0962841	-0.0240796	0.0641622	-0.377696	0.705656	0.999995
ENSMUSG00000006641	Slc5a6	protein_coding	5	solute carrier family 5 (sodium-dependent vitamin transporter), member 6	SLC5A6	381.735	0.00929937	0.00619261	0.0684981	0.0933801	0.925602	0.999995
ENSMUSG00000006642	Tcf23	protein_coding	5	transcription factor 23	TCF23	8.51135	-0.202401	-0.0126	0.0349305	-0.341195	0.732957	0.999995
ENSMUSG00000006649	Nphs1	protein_coding	7	nephrosis 1, nephrin	NPHS1	8.22751	-0.0870609	-0.00114359	0.0329626	-0.138066	0.890188	0.999995
ENSMUSG00000006651	Aplp1	protein_coding	7	amyloid beta (A4) precursor-like protein 1	APLP1	15045.5	-0.057288	-0.048872	0.0511685	-0.963764	0.335164	0.999995
ENSMUSG00000006673	Qrich1	protein_coding	9	glutamine-rich 1	QRICH1	2351.97	-0.0153126	-0.0133344	0.0495809	-0.268943	0.787973	0.999995
ENSMUSG00000006675	P4htm	protein_coding	9	prolyl 4-hydroxylase, transmembrane (endoplasmic reticulum)	P4HTM	1028.19	0.0442719	0.0340321	0.062272	0.546964	0.584404	0.999995
ENSMUSG00000006676	Usp19	protein_coding	9	ubiquitin specific peptidase 19	USP19	1921.22	-0.0589024	-0.0461034	0.0611613	-0.751904	0.452109	0.999995
ENSMUSG00000006678	Pola1	protein_coding	X	polymerase (DNA directed), alpha 1	POLA1	351.331	-0.00865236	-0.00588114	0.0707702	-0.0787634	0.937221	0.999995
ENSMUSG00000006699	Cdc42	protein_coding	4	cell division cycle 42	CDC42	4365.91	0.10751	0.0932749	0.0501246	1.86058	0.0628041	0.999995
ENSMUSG00000006705	Pknox1	protein_coding	17	Pbx/knotted 1 homeobox	PKNOX1	445.641	-0.0344635	-0.0245542	0.0668763	-0.367371	0.713342	0.999995
ENSMUSG00000006711	D130043K22Rik	protein_coding	13	RIKEN cDNA D130043K22 gene	KIAA0319	723.565	0.120461	0.0958338	0.0599424	1.59256	0.111259	0.999995
ENSMUSG00000006715	Gmnn	protein_coding	13	geminin	GMNN	56.6749	-0.022851	-0.000346505	0.0646843	-0.0910111	0.927484	0.999995
ENSMUSG00000006717	Acot13	protein_coding	13	acyl-CoA thioesterase 13	ACOT13	508.936	0.153999	0.114017	0.0648238	1.75844	0.0786733	0.999995
ENSMUSG00000006720	Zfp184	protein_coding	13	zinc finger protein 184 (Kruppel-like)	ZNF184	49.7456	0.0350038	0.00898022	0.0643691	0.138264	0.890032	0.999995
ENSMUSG00000006728	Cdk4	protein_coding	10	cyclin-dependent kinase 4	CDK4	542.827	0.0589188	0.0442923	0.0637507	0.695918	0.48648	0.999995
ENSMUSG00000006731	B4galnt1	protein_coding	10	beta-1,4-N-acetyl-galactosaminyl transferase 1	B4GALNT1	756.501	-0.103766	-0.0790182	0.0629508	-1.25598	0.209123	0.999995
ENSMUSG00000006732	Mettl1	protein_coding	10	methyltransferase like 1	METTL1	170.301	0.193535	0.100806	0.073847	1.36532	0.172153	0.999995
ENSMUSG00000006736	Tspan31	protein_coding	10	tetraspanin 31	TSPAN31	712.403	0.124525	0.0963562	0.0615827	1.57012	0.116386	0.999995
ENSMUSG00000006740	Kif5b	protein_coding	18	kinesin family member 5B	KIF5B	15280.8	0.0541685	0.0460398	0.0537066	0.850777	0.394893	0.999995
ENSMUSG00000006763	Saal1	protein_coding	7	serum amyloid A-like 1	SAAL1	199.518	0.102635	0.0542258	0.0737916	0.735247	0.462189	0.999995
ENSMUSG00000006764	Tph2	protein_coding	10	tryptophan hydroxylase 2	TPH2	10.9848	0.22699	0.0141753	0.0364329	0.404554	0.685806	0.999995
ENSMUSG00000006782	Cnp	protein_coding	11	2',3'-cyclic nucleotide 3' phosphodiesterase	CNP	15643.4	-0.00598904	-0.00533787	0.0462725	-0.115179	0.908303	0.999995
ENSMUSG00000006784	Ttc25	protein_coding	11	tetratricopeptide repeat domain 25		40.5912	-0.129974	-0.0251982	0.0582056	-0.428121	0.668563	0.999995
ENSMUSG00000006800	Sulf2	protein_coding	2	sulfatase 2	SULF2	1955.4	-0.0379124	-0.0313905	0.0555944	-0.565655	0.571628	0.999995
ENSMUSG00000006818	Sod2	protein_coding	17	superoxide dismutase 2, mitochondrial	SOD2	4237.98	0.0363526	0.0310635	0.052386	0.591743	0.554023	0.999995
ENSMUSG00000006850	Tmco6	protein_coding	18	transmembrane and coiled-coil domains 6	TMCO6	192.425	0.0669128	0.0373554	0.0734078	0.508931	0.6108	0.999995
ENSMUSG00000006906	Stambp	protein_coding	6	STAM binding protein	STAMBP	210.397	-0.108995	-0.0616779	0.0732476	-0.843339	0.399039	0.999995
ENSMUSG00000006920	Ezh1	protein_coding	11	enhancer of zeste 1 polycomb repressive complex 2 subunit	EZH1	1415.36	0.00308535	0.00260037	0.0530052	0.0493881	0.96061	0.999995
ENSMUSG00000006930	Hap1	protein_coding	11	huntingtin-associated protein 1	HAP1	3143.26	-0.0459268	-0.0402399	0.0521351	-0.752635	0.451669	0.999995
ENSMUSG00000006931	P3h4	protein_coding	11	prolyl 3-hydroxylase family member 4 (non-enzymatic)	P3H4	341.397	0.139437	0.0898715	0.0709102	1.26051	0.207486	0.999995
ENSMUSG00000006932	Ctnnb1	protein_coding	9	catenin (cadherin associated protein), beta 1	CTNNB1	8053.25	0.03462	0.031725	0.0407458	0.779276	0.435817	0.999995
ENSMUSG00000006941	Eif1b	protein_coding	9	eukaryotic translation initiation factor 1B	EIF1B	1014.83	0.0808657	0.062726	0.0610657	1.03516	0.300596	0.999995
ENSMUSG00000006958	Chrd	protein_coding	16	chordin	CHRD	151.083	-0.319722	-0.157728	0.0739092	-2.13919	0.03242	0.999995
ENSMUSG00000006998	Psmd2	protein_coding	16	proteasome (prosome, macropain) 26S subunit, non-ATPase, 2	PSMD2	4759.49	0.0367539	0.0329236	0.0451665	0.728942	0.466037	0.999995
ENSMUSG00000007029	Vars	protein_coding	17	valyl-tRNA synthetase	VARS1	538.537	0.0323863	0.0218016	0.0678423	0.333404	0.738829	0.999995
ENSMUSG00000007030	Vwa7	protein_coding	17	von Willebrand factor A domain containing 7	VWA7	348.792	-0.171665	-0.106504	0.0719419	-1.46608	0.142626	0.999995
ENSMUSG00000007033	Hspa1l	protein_coding	17	heat shock protein 1-like	HSPA1L	7.81367	-0.0753774	-0.00227543	0.0330518	-0.120065	0.904432	0.999995
ENSMUSG00000007035	Msh5	protein_coding	17	mutS homolog 5	MSH5	19.7574	-0.0040978	0.00406847	0.0466871	-0.00985179	0.99214	0.999995
ENSMUSG00000007036	Abhd16a	protein_coding	17	abhydrolase domain containing 16A	ABHD16A	1231.35	0.0833153	0.0647985	0.0614887	1.05344	0.29214	0.999995
ENSMUSG00000007038	Neu1	protein_coding	17	neuraminidase 1	NEU1	962.158	-0.0156533	-0.0123456	0.060076	-0.206171	0.836657	0.999995
ENSMUSG00000007039	Ddah2	protein_coding	17	dimethylarginine dimethylaminohydrolase 2	DDAH2	210.161	-0.0802086	-0.0436889	0.0736621	-0.589095	0.555797	0.999995
ENSMUSG00000007041	Clic1	protein_coding	17	chloride intracellular channel 1	CLIC1	164.978	0.142366	0.0744136	0.0738881	0.987759	0.323271	0.999995
ENSMUSG00000007050	Lsm2	protein_coding	17	LSM2 homolog, U6 small nuclear RNA and mRNA degradation associated	LSM2	53.2286	-0.117219	-0.028684	0.0648026	-0.469082	0.639011	0.999995
ENSMUSG00000007080	Pole	protein_coding	5	polymerase (DNA directed), epsilon	POLE	96.138	-0.0649951	-0.0222005	0.0706545	-0.324768	0.745357	0.999995
ENSMUSG00000007097	Atp1a2	protein_coding	1	ATPase, Na+/K+ transporting, alpha 2 polypeptide	ATP1A2	45667.6	0.0300738	0.0270671	0.0436288	0.622864	0.533374	0.999995
ENSMUSG00000007107	Atp1a4	protein_coding	1	ATPase, Na+/K+ transporting, alpha 4 polypeptide	ATP1A4	12.2508	0.873619	0.0289192	0.0188314	0.718314	0.472564	0.999995
ENSMUSG00000007122	Casq1	protein_coding	1	calsequestrin 1	CASQ1	47.3513	-0.266265	-0.0614723	0.0591664	-0.89747	0.369468	0.999995
ENSMUSG00000007207	Stx1a	protein_coding	5	syntaxin 1A (brain)	STX1A	236.068	-0.0374781	-0.0217286	0.0731186	-0.293717	0.768974	0.999995
ENSMUSG00000007216	Zfp775	protein_coding	6	zinc finger protein 775	ZNF775	166.768	0.00358904	0.00296873	0.0738128	0.0230434	0.981616	0.999995
ENSMUSG00000007279	Scube2	protein_coding	7	signal peptide, CUB domain, EGF-like 2	SCUBE2	11.205	0.0497626	0.00388962	0.0379533	0.0929769	0.925922	0.999995
ENSMUSG00000007338	Mrpl49	protein_coding	19	mitochondrial ribosomal protein L49	MRPL49	506.439	0.058678	0.04112	0.0671799	0.61883	0.536029	0.999995
ENSMUSG00000007379	Dennd2c	protein_coding	3	DENN/MADD domain containing 2C	DENND2C	20.329	0.0803533	0.00855923	0.0487038	0.203453	0.838781	0.999995
ENSMUSG00000007411	Mark3	protein_coding	12	MAP/microtubule affinity regulating kinase 3	MARK3	1709.21	0.00912419	0.00786549	0.0510637	0.153933	0.877662	0.999995
ENSMUSG00000007415	Gatad1	protein_coding	5	GATA zinc finger domain containing 1	GATAD1	1370.89	0.03175	0.0267068	0.0537865	0.497589	0.618774	0.999995
ENSMUSG00000007440	Pcdha11	protein_coding	18	protocadherin alpha 11	PCDHA11	79.6568	-0.324027	-0.105841	0.0693999	-1.52817	0.12647	0.999995
ENSMUSG00000007458	M6pr	protein_coding	6	mannose-6-phosphate receptor, cation dependent	M6PR	2477.11	0.0460967	0.0401329	0.0495696	0.809876	0.418012	0.999995
ENSMUSG00000007476	Lrrc8a	protein_coding	2	leucine rich repeat containing 8A VRAC subunit A	LRRC8A	614.566	0.0882649	0.065509	0.0643729	1.02243	0.306576	0.999995
ENSMUSG00000007480	Mc5r	protein_coding	18	melanocortin 5 receptor	MC5R	130.073	0.0297118	0.0105375	0.0699308	0.143648	0.885779	0.999995
ENSMUSG00000007564	Ppp2r1a	protein_coding	17	protein phosphatase 2, regulatory subunit A, alpha	PPP2R1A	6527.05	0.0709964	0.0625517	0.0477466	1.311	0.189857	0.999995
ENSMUSG00000007570	Fance	protein_coding	17	Fanconi anemia, complementation group E	FANCE	194.59	0.0733774	0.0375034	0.0738877	0.50949	0.610409	0.999995
ENSMUSG00000007589	Tinf2	protein_coding	14	Terf1 (TRF1)-interacting nuclear factor 2	TINF2	297.307	-0.0740357	-0.0477253	0.0707567	-0.674315	0.500111	0.999995
ENSMUSG00000007591	Tssk4	protein_coding	14	testis-specific serine kinase 4	TSSK4	5.99739	-0.725591	-0.0290798	0.0291807	-0.996436	0.319038	0.999995
ENSMUSG00000007594	Hapln4	protein_coding	8	hyaluronan and proteoglycan link protein 4	HAPLN4	2096.48	0.0120683	0.00989215	0.0569861	0.173323	0.862398	0.999995
ENSMUSG00000007603	Dus3l	protein_coding	17	dihydrouridine synthase 3-like (S. cerevisiae)	DUS3L	831.759	-0.129063	-0.10004	0.0615729	-1.6276	0.103609	0.999995
ENSMUSG00000007610	Gtpbp3	protein_coding	8	GTP binding protein 3	GTPBP3	489.468	-0.0073163	-0.00527232	0.0665421	-0.0789048	0.937108	0.999995
ENSMUSG00000007613	Tgfbr1	protein_coding	4	transforming growth factor, beta receptor I	TGFBR1	816.543	0.00266462	0.00202268	0.06068	0.0344927	0.972484	0.999995
ENSMUSG00000007617	Homer1	protein_coding	13	homer scaffolding protein 1	HOMER1	732.416	0.0279373	0.0211326	0.0632995	0.33461	0.737919	0.999995
ENSMUSG00000007646	Rad51c	protein_coding	11	RAD51 paralog C	RAD51C	70.4421	0.112683	0.0337299	0.068453	0.512416	0.60836	0.999995
ENSMUSG00000007653	Gabrb2	protein_coding	11	gamma-aminobutyric acid (GABA) A receptor, subunit beta 2	GABRB2	968.576	0.0742515	0.0595742	0.0589012	1.01109	0.311976	0.999995
ENSMUSG00000007655	Cav1	protein_coding	6	caveolin 1, caveolae protein	CAV1	502.358	-0.221793	-0.124497	0.0733151	-1.70419	0.0883463	0.999995
ENSMUSG00000007656	Arpp19	protein_coding	9	cAMP-regulated phosphoprotein 19	ARPP19	1394.48	-0.032119	-0.0257389	0.0593463	-0.431906	0.665809	0.999995
ENSMUSG00000007659	Bcl2l1	protein_coding	2	BCL2-like 1	BCL2L1	1545.93	0.100644	0.0820017	0.0575246	1.42409	0.15442	0.999995
ENSMUSG00000007670	Khsrp	protein_coding	17	KH-type splicing regulatory protein	KHSRP	638.953	-0.113477	-0.0794916	0.0677291	-1.17305	0.240777	0.999995
ENSMUSG00000007682	Dio2	protein_coding	12	deiodinase, iodothyronine, type II	DIO2	506.416	-0.0708855	-0.0287196	0.0648393	-0.28415	0.776295	0.999995
ENSMUSG00000007721	Ccdc124	protein_coding	8	coiled-coil domain containing 124	CCDC124	729.004	-0.00897076	-0.00635573	0.0664386	-0.0970943	0.922651	0.999995
ENSMUSG00000007739	Cct4	protein_coding	11	chaperonin containing Tcp1, subunit 4 (delta)	CCT4	1984.04	0.111378	0.09686	0.0498463	1.94214	0.0521205	0.999995
ENSMUSG00000007777	0610009B22Rik	protein_coding	11	RIKEN cDNA 0610009B22 gene		233.032	0.109062	0.0648863	0.0725965	0.892266	0.372251	0.999995
ENSMUSG00000007783	Cpt1c	protein_coding	7	carnitine palmitoyltransferase 1c	CPT1C	844.084	0.0211773	0.016617	0.0607497	0.273579	0.784408	0.999995
ENSMUSG00000007812	Zfp655	protein_coding	5	zinc finger protein 655	ZNF655	873.766	0.0165571	0.0125533	0.0615653	0.208876	0.834545	0.999995
ENSMUSG00000007815	Rhoa	protein_coding	9	ras homolog family member A	RHOA	1735.44	-0.0123206	-0.0108162	0.0522682	-0.201191	0.840549	0.999995
ENSMUSG00000007817	Zmiz1	protein_coding	14	zinc finger, MIZ-type containing 1	ZMIZ1	439.77	-0.190569	-0.128962	0.0689674	-1.87779	0.0604093	0.999995
ENSMUSG00000007827	Ankrd26	protein_coding	6	ankyrin repeat domain 26	ANKRD26	687.065	0.0198345	0.015317	0.062411	0.24403	0.807207	0.999995
ENSMUSG00000007833	Aldh16a1	protein_coding	7	aldehyde dehydrogenase 16 family, member A1	ALDH16A1	186.434	0.154825	0.0791073	0.0739004	1.06653	0.286186	0.999995
ENSMUSG00000007836	Hnrnpa0	protein_coding	13	heterogeneous nuclear ribonucleoprotein A0	HNRNPA0	1111.56	0.0223607	0.0183125	0.0570936	0.320189	0.748825	0.999995
ENSMUSG00000007837	Prrg2	protein_coding	7	proline-rich Gla (G-carboxyglutamic acid) polypeptide 2	PRRG2	86.3979	-0.0921973	-0.0349099	0.0717168	-0.487102	0.626186	0.999995
ENSMUSG00000007850	Hnrnph1	protein_coding	11	heterogeneous nuclear ribonucleoprotein H1	HNRNPH1	3305.44	0.0232709	0.0194103	0.0552234	0.350743	0.725781	0.999995
ENSMUSG00000007867	Ift43	protein_coding	12	intraflagellar transport 43	IFT43	157.055	0.0749728	0.0372125	0.0739109	0.503827	0.614383	0.999995
ENSMUSG00000007872	Id3	protein_coding	4	inhibitor of DNA binding 3	ID3	397.073	-0.0308275	-0.0198386	0.0710348	-0.276909	0.78185	0.999995
ENSMUSG00000007880	Arid1a	protein_coding	4	AT rich interactive domain 1A (SWI-like)	ARID1A	718.192	-0.215868	-0.147665	0.068667	-2.15298	0.0313203	0.999995
ENSMUSG00000007888	Crlf1	protein_coding	8	cytokine receptor-like factor 1	CRLF1	12.8064	0.0846198	0.00762688	0.0380207	0.158449	0.874103	0.999995
ENSMUSG00000007891	Ctsd	protein_coding	7	cathepsin D	CTSD	5510.23	0.0461543	0.0394362	0.0513723	0.772186	0.440004	0.999995
ENSMUSG00000007892	Rplp1	protein_coding	9	ribosomal protein, large, P1	RPLP1	3627.67	0.0134042	0.0114813	0.0539432	0.209181	0.834307	0.999995
ENSMUSG00000007908	Hmgcll1	protein_coding	9	3-hydroxymethyl-3-methylglutaryl-Coenzyme A lyase-like 1	HMGCLL1	219.955	0.147956	0.0846806	0.0731775	1.1531	0.248868	0.999995
ENSMUSG00000007944	Ttc9b	protein_coding	7	tetratricopeptide repeat domain 9B	TTC9B	219.858	-0.0566068	-0.0305773	0.0735578	-0.422386	0.672744	0.999995
ENSMUSG00000007946	Phox2a	protein_coding	7	paired-like homeobox 2a	PHOX2A	2.24071	0.0868577	0.00204523	0.0188705	0.0761828	0.939274	0.999995
ENSMUSG00000007950	Abhd8	protein_coding	8	abhydrolase domain containing 8	ABHD8	2726.88	0.0787327	0.0653791	0.0558402	1.16687	0.243265	0.999995
ENSMUSG00000007987	Ift22	protein_coding	5	intraflagellar transport 22	IFT22	678.503	0.100014	0.077936	0.0613059	1.27134	0.203609	0.999995
ENSMUSG00000007989	Fzd3	protein_coding	14	frizzled class receptor 3	FZD3	2147.35	-0.00559645	-0.00460084	0.0532091	-0.0890906	0.92901	0.999995
ENSMUSG00000008028	1700008O03Rik	protein_coding	7	RIKEN cDNA 1700008O03 gene	C19orf81	37.0659	-0.187331	-0.0403529	0.0589562	-0.628596	0.529614	0.999995
ENSMUSG00000008035	Mid1ip1	protein_coding	X	Mid1 interacting protein 1 (gastrulation specific G12-like (zebrafish))	MID1IP1	2588.85	0.040673	0.034613	0.0512176	0.683328	0.4944	0.999995
ENSMUSG00000008036	Ap2s1	protein_coding	7	adaptor-related protein complex 2, sigma 1 subunit	AP2S1	1297.81	0.0538365	0.0436379	0.0584246	0.742948	0.457513	0.999995
ENSMUSG00000008090	Fgfrl1	protein_coding	5	fibroblast growth factor receptor-like 1	FGFRL1	699.156	0.0868989	0.064196	0.0652101	0.979952	0.32711	0.999995
ENSMUSG00000008129	4930432K21Rik	protein_coding	8	RIKEN cDNA 4930432K21 gene		46.4578	0.133514	0.0322747	0.0633969	0.511631	0.60891	0.999995
ENSMUSG00000008136	Fhl2	protein_coding	1	four and a half LIM domains 2	FHL2	83.7486	-0.183454	-0.064055	0.0707911	-0.922216	0.356416	0.999995
ENSMUSG00000008140	Emc10	protein_coding	7	ER membrane protein complex subunit 10	EMC10	2150.85	0.0321838	0.0279955	0.0497286	0.563	0.573435	0.999995
ENSMUSG00000008153	Clstn3	protein_coding	6	calsyntenin 3	CLSTN3	8327.51	0.0131687	0.011454	0.0499233	0.229148	0.818754	0.999995
ENSMUSG00000008167	Fbxw9	protein_coding	8	F-box and WD-40 domain protein 9	FBXW9	184.627	0.131479	0.0680624	0.0739043	0.902829	0.366616	0.999995
ENSMUSG00000008193	Spib	protein_coding	7	Spi-B transcription factor (Spi-1/PU.1 related)	SPIB	3.50661	-0.272687	-0.00609762	0.0222909	-0.283916	0.776475	0.999995
ENSMUSG00000008200	Fnbp4	protein_coding	2	formin binding protein 4	FNBP4	817.47	-0.1008	-0.0769157	0.0628255	-1.22473	0.220677	0.999995
ENSMUSG00000008206	Cers4	protein_coding	8	ceramide synthase 4	CERS4	907.577	-0.0712563	-0.0550031	0.0623809	-0.877437	0.380249	0.999995
ENSMUSG00000008226	Scrn3	protein_coding	2	secernin 3	SCRN3	929.011	-0.00985702	-0.00832929	0.059356	-0.13251	0.894581	0.999995
ENSMUSG00000008301	Phax	protein_coding	18	phosphorylated adaptor for RNA export	PHAX	623.683	-0.0243758	-0.0186309	0.0627208	-0.297117	0.766377	0.999995
ENSMUSG00000008305	Tle1	protein_coding	4	transducin-like enhancer of split 1	TLE1	791.999	0.000918816	0.000830994	0.06482	0.0104927	0.991628	0.999995
ENSMUSG00000008307	1700109H08Rik	protein_coding	5	RIKEN cDNA 1700109H08 gene		103.557	-0.0746298	-0.0249809	0.0693398	-0.351716	0.725051	0.999995
ENSMUSG00000008318	Relt	protein_coding	7	RELT tumor necrosis factor receptor	RELT	566.072	0.121872	0.0839863	0.0683906	1.22892	0.219101	0.999995
ENSMUSG00000008333	Snrpb2	protein_coding	2	U2 small nuclear ribonucleoprotein B	SNRPB2	393.986	0.080649	0.0526808	0.0704201	0.746582	0.455316	0.999995
ENSMUSG00000008348	Ubc	protein_coding	5	ubiquitin C	UBC	3167.02	0.284517	0.0540667	0.0582193	0.93805	0.348219	0.999995
ENSMUSG00000008373	Prpf31	protein_coding	7	pre-mRNA processing factor 31	PRPF31	836.002	0.0142065	0.0108492	0.0619029	0.177444	0.859159	0.999995
ENSMUSG00000008384	Sertad1	protein_coding	7	SERTA domain containing 1	SERTAD1	73.2554	-0.121361	-0.0365897	0.0683843	-0.550288	0.582122	0.999995
ENSMUSG00000008393	Carhsp1	protein_coding	16	calcium regulated heat stable protein 1	CARHSP1	2048.29	0.159701	0.134021	0.0541415	2.47883	0.0131813	0.999995
ENSMUSG00000008398	Elk3	protein_coding	10	ELK3, member of ETS oncogene family	ELK3	126.429	0.112802	0.0435997	0.0725375	0.628206	0.529869	0.999995
ENSMUSG00000008429	Herpud2	protein_coding	9	HERPUD family member 2	HERPUD2	423.167	-0.204286	-0.139387	0.0687889	-2.02733	0.0426287	0.999995
ENSMUSG00000008435	Rdh13	protein_coding	7	retinol dehydrogenase 13 (all-trans and 9-cis)	RDH13	400.555	0.207785	0.146476	0.0674244	2.1719	0.0298636	0.999995
ENSMUSG00000008438	Adam21	protein_coding	12	a disintegrin and metallopeptidase domain 21	ADAM21	26.3459	-0.256656	-0.0312797	0.051482	-0.701273	0.483133	0.999995
ENSMUSG00000008450	Nutf2	protein_coding	8	nuclear transport factor 2	NUTF2	301.368	0.129669	0.0817578	0.0713338	1.14683	0.251451	0.999995
ENSMUSG00000008475	Arpc5	protein_coding	1	actin related protein 2/3 complex, subunit 5	ARPC5	731.97	0.0124771	0.00944711	0.0630087	0.150771	0.880156	0.999995
ENSMUSG00000008482	Rnf151	protein_coding	17	ring finger protein 151	RNF151	2.66119	-0.943387	-0.0189057	0.0206932	-0.883799	0.376805	0.999995
ENSMUSG00000008489	Elavl2	protein_coding	4	ELAV like RNA binding protein 1	ELAVL2	1991.28	0.0362836	0.0312269	0.0507669	0.617082	0.537181	0.999995
ENSMUSG00000008496	Pou2f2	protein_coding	7	POU domain, class 2, transcription factor 2	POU2F2	26.5446	0.144378	0.0201452	0.0517524	0.398925	0.689948	0.999995
ENSMUSG00000008540	Mgst1	protein_coding	6	microsomal glutathione S-transferase 1	MGST1	273.953	0.119283	0.0633518	0.0733871	0.909262	0.363212	0.999995
ENSMUSG00000008575	Nfib	protein_coding	4	nuclear factor I/B	NFIB	1562.12	-0.0492649	-0.0409684	0.0554395	-0.738152	0.460422	0.999995
ENSMUSG00000008601	Rab25	protein_coding	3	RAB25, member RAS oncogene family	RAB25	2.55095	0.649038	0.00500579	0.0186581	0.542198	0.587682	0.999995
ENSMUSG00000008604	Ubqln4	protein_coding	3	ubiquilin 4	UBQLN4	1595.76	0.0438259	0.0371428	0.0531608	0.698588	0.484809	0.999995
ENSMUSG00000008658	Rbfox1	protein_coding	16	RNA binding protein, fox-1 homolog (C. elegans) 1	RBFOX1	3012.26	0.077	0.0692124	0.0445909	1.55199	0.120665	0.999995
ENSMUSG00000008668	Rps18	protein_coding	17	ribosomal protein S18	RPS18	1305.73	0.139897	0.0963374	0.0687046	1.39329	0.163531	0.999995
ENSMUSG00000008682	Rpl10	protein_coding	X	ribosomal protein L10	RPL10	3089.89	0.112514	0.0966399	0.0512876	1.88674	0.0591949	0.999995
ENSMUSG00000008690	Ncaph2	protein_coding	15	non-SMC condensin II complex, subunit H2	NCAPH2	1809.68	-0.0141409	-0.011842	0.0546002	-0.216777	0.828382	0.999995
ENSMUSG00000008730	Hipk1	protein_coding	3	homeodomain interacting protein kinase 1	HIPK1	2683.31	-0.0412478	-0.0362821	0.0480606	-0.755136	0.450167	0.999995
ENSMUSG00000008734	Gprc5b	protein_coding	7	G protein-coupled receptor, family C, group 5, member B	GPRC5B	7079.76	0.0470813	0.0430047	0.0415668	1.03463	0.300844	0.999995
ENSMUSG00000008763	Man1a2	protein_coding	3	mannosidase, alpha, class 1A, member 2	MAN1A2	2230.64	0.0300494	0.0259012	0.0510183	0.507587	0.611743	0.999995
ENSMUSG00000008822	Acyp1	protein_coding	12	acylphosphatase 1, erythrocyte (common) type	ACYP1	226.473	0.229471	0.130801	0.0731913	1.78573	0.0741436	0.999995
ENSMUSG00000008845	Cd163	protein_coding	6	CD163 antigen	CD163	17.7655	-0.624342	-0.0465102	0.0393287	-1.20948	0.226478	0.999995
ENSMUSG00000008855	Hdac5	protein_coding	11	histone deacetylase 5	HDAC5	2914.94	0.00596514	0.0051707	0.0513712	0.0998032	0.920501	0.999995
ENSMUSG00000008859	Rala	protein_coding	13	v-ral simian leukemia viral oncogene A (ras related)	RALA	1335.51	-0.0617662	-0.0493561	0.0600756	-0.813525	0.415917	0.999995
ENSMUSG00000008892	Vdac3	protein_coding	8	voltage-dependent anion channel 3	VDAC3	2777.09	0.0636714	0.050459	0.0601138	0.83773	0.402182	0.999995
ENSMUSG00000008932	Slc1a7	protein_coding	4	solute carrier family 1 (glutamate transporter), member 7	SLC1A7	2.45978	-0.463945	-0.00840968	0.0199447	-0.414879	0.67823	0.999995
ENSMUSG00000008958	Vps72	protein_coding	3	vacuolar protein sorting 72	VPS72	305.191	-0.0775234	-0.0492004	0.071382	-0.683762	0.494125	0.999995
ENSMUSG00000008976	Gabpa	protein_coding	16	GA repeat binding protein, alpha	GABPA	558.387	0.0259828	0.0193926	0.0642086	0.302551	0.762232	0.999995
ENSMUSG00000008999	Bmp7	protein_coding	2	bone morphogenetic protein 7	BMP7	124.609	0.174642	0.0646194	0.0713832	0.905902	0.364988	0.999995
ENSMUSG00000009013	Dynll1	protein_coding	5	dynein light chain LC8-type 1	DYNLL1	1740.98	0.0342357	0.0279825	0.0571086	0.490032	0.624111	0.999995
ENSMUSG00000009030	Pdcl	protein_coding	2	phosducin-like	PDCL	576.76	-0.0126664	-0.00977053	0.0632212	-0.152066	0.879135	0.999995
ENSMUSG00000009035	Tmem184b	protein_coding	15	transmembrane protein 184b	TMEM184B	613.914	-0.0860466	-0.064377	0.0642427	-1.00078	0.316936	0.999995
ENSMUSG00000009070	Rsph14	protein_coding	10	radial spoke head homolog 14 (Chlamydomonas)	RSPH14	7.48182	0.290451	0.0139264	0.0313595	0.436921	0.662169	0.999995
ENSMUSG00000009073	Nf2	protein_coding	11	neurofibromin 2	NF2	1647.63	0.000817296	0.000669128	0.0541109	0.0126965	0.98987	0.999995
ENSMUSG00000009075	Cabp7	protein_coding	11	calcium binding protein 7	CABP7	4164.45	0.014789	0.0113681	0.062413	0.181945	0.855626	0.999995
ENSMUSG00000009076	Zmat5	protein_coding	11	zinc finger, matrin type 5	ZMAT5	190.627	0.0563901	0.0277237	0.0738468	0.397888	0.690713	0.999995
ENSMUSG00000009079	Ewsr1	protein_coding	11	Ewing sarcoma breakpoint region 1	EWSR1	3343.91	0.0138429	0.0120661	0.0494981	0.24368	0.807479	0.999995
ENSMUSG00000009090	Ap1b1	protein_coding	11	adaptor protein complex AP-1, beta 1 subunit	AP1B1	3615.96	0.0530234	0.0461585	0.0493995	0.93589	0.34933	0.999995
ENSMUSG00000009092	Derl3	protein_coding	10	Der1-like domain family, member 3	DERL3	13.4107	-0.0314489	-0.00439237	0.0416057	-0.0654697	0.9478	0.999995
ENSMUSG00000009097	Tbx1	protein_coding	16	T-box 1	TBX1	27.3455	0.0721609	0.0112289	0.0529651	0.205903	0.836867	0.999995
ENSMUSG00000009112	Bcl2l13	protein_coding	6	BCL2-like 13 (apoptosis facilitator)	BCL2L13	769.796	0.0873098	0.0688735	0.0603486	1.14104	0.253854	0.999995
ENSMUSG00000009145	Dqx1	protein_coding	6	DEAQ RNA-dependent ATPase	DQX1	13.5741	-0.352465	-0.0311176	0.0412708	-0.724445	0.468792	0.999995
ENSMUSG00000009207	Lnpk	protein_coding	2	lunapark, ER junction formation factor	LNPK	1117.52	0.0736559	0.0588945	0.0591985	0.994615	0.319924	0.999995
ENSMUSG00000009214	Mymk	protein_coding	2	myomaker, myoblast fusion factor	MYMK	1.95035	0.6189	0.0093614	0.0161883	0.459233	0.646067	0.999995
ENSMUSG00000009216	Fam163b	protein_coding	2	family with sequence similarity 163, member B	FAM163B	65.1502	-0.14086	-0.0401667	0.0652636	-0.57217	0.567207	0.999995
ENSMUSG00000009248	Ascl2	protein_coding	7	achaete-scute family bHLH transcription factor 2	ASCL2	6.31313	0.66893	0.0269229	0.0282369	0.89166	0.372575	0.999995
ENSMUSG00000009281	Rarres2	protein_coding	6	retinoic acid receptor responder (tazarotene induced) 2	RARRES2	82.0574	-0.0888691	-0.0332775	0.0697046	-0.425098	0.670765	0.999995
ENSMUSG00000009291	Pttg1ip	protein_coding	10	pituitary tumor-transforming 1 interacting protein	PTTG1IP	1088.84	0.100488	0.0833531	0.055558	1.50081	0.133404	0.999995
ENSMUSG00000009292	Trpm2	protein_coding	10	transient receptor potential cation channel, subfamily M, member 2	TRPM2	1455.99	-0.0384945	-0.0306583	0.0594975	-0.515428	0.606254	0.999995
ENSMUSG00000009293	Ube2g2	protein_coding	10	ubiquitin-conjugating enzyme E2G 2	UBE2G2	573.738	0.217915	0.151466	0.0682632	2.20787	0.0272534	0.999995
ENSMUSG00000009350	Mpo	protein_coding	11	myeloperoxidase	MPO	1.62046	-1.11735	-0.0102897	0.0141836	-0.714125	0.47515	0.999995
ENSMUSG00000009356	Lpo	protein_coding	11	lactoperoxidase	LPO	98.4992	-0.420086	-0.13296	0.0698359	-2.01292	0.0441232	0.999995
ENSMUSG00000009376	Met	protein_coding	6	met proto-oncogene	MET	204.571	-0.0510733	-0.027449	0.0739043	-0.350725	0.725795	0.999995
ENSMUSG00000009378	Slc16a12	protein_coding	19	solute carrier family 16 (monocarboxylic acid transporters), member 12	SLC16A12	45.45	-0.37634	-0.0782606	0.0608816	-1.3337	0.182302	0.999995
ENSMUSG00000009394	Syn2	protein_coding	6	synapsin II	SYN2	3056.27	-0.023505	-0.0210056	0.0462539	-0.452267	0.651077	0.999995
ENSMUSG00000009406	Elk1	protein_coding	X	ELK1, member of ETS oncogene family	ELK1	294.158	-0.0964496	-0.0609202	0.0713405	-0.852602	0.39388	0.999995
ENSMUSG00000009418	Nav1	protein_coding	1	neuron navigator 1	NAV1	710.552	0.0306482	0.0078022	0.0649215	0.123207	0.901943	0.999995
ENSMUSG00000009470	Tnpo1	protein_coding	13	transportin 1	TNPO1	2849.25	0.0675505	0.0594704	0.0479223	1.24138	0.214466	0.999995
ENSMUSG00000009535	Rnmt	protein_coding	18	RNA (guanine-7-) methyltransferase	RNMT	1691.05	0.10421	0.0858541	0.0564244	1.51994	0.128525	0.999995
ENSMUSG00000009545	Kcnq1	protein_coding	7	potassium voltage-gated channel, subfamily Q, member 1	KCNQ1	8.01159	-0.0525561	-0.00235145	0.0334819	-0.0850956	0.932185	0.999995
ENSMUSG00000009549	Srp14	protein_coding	2	signal recognition particle 14	SRP14	1079.48	0.0296044	0.0231516	0.0610114	0.379565	0.704268	0.999995
ENSMUSG00000009551	6330409D20Rik	protein_coding	2	RIKEN cDNA 6330409D20 gene		76.0663	0.270365	0.0893888	0.0694259	1.27789	0.201287	0.999995
ENSMUSG00000009555	Cdk9	protein_coding	2	cyclin-dependent kinase 9 (CDC2-related kinase)	CDK9	590.308	-0.060324	-0.0451002	0.0645118	-0.695689	0.486624	0.999995
ENSMUSG00000009563	Tor2a	protein_coding	2	torsin family 2, member A	TOR2A	205.897	-0.0876406	-0.0496838	0.0732475	-0.678108	0.497703	0.999995
ENSMUSG00000009566	Fpgs	protein_coding	2	folylpolyglutamyl synthetase	FPGS	130.763	-0.0985326	-0.0411666	0.072972	-0.567611	0.570299	0.999995
ENSMUSG00000009569	Mrtfb	protein_coding	16	myocardin related transcription factor B	MRTFB	1049.52	-0.0745237	-0.0601576	0.0587139	-1.02008	0.307692	0.999995
ENSMUSG00000009575	Cbx5	protein_coding	15	chromobox 5	CBX5	5956.17	0.0144878	0.012747	0.047961	0.265959	0.790271	0.999995
ENSMUSG00000009585	Apobec3	protein_coding	15	apolipoprotein B mRNA editing enzyme, catalytic polypeptide 3	APOBEC3B	52.2426	0.237149	0.0590596	0.0638756	0.921724	0.356673	0.999995
ENSMUSG00000009614	Sardh	protein_coding	2	sarcosine dehydrogenase	SARDH	389.094	0.0566941	0.0369903	0.0704032	0.52524	0.599417	0.999995
ENSMUSG00000009628	Tex15	protein_coding	8	testis expressed gene 15	TEX15	167.564	-0.0752506	-0.0359417	0.0738723	-0.492391	0.622443	0.999995
ENSMUSG00000009630	Ppp2cb	protein_coding	8	protein phosphatase 2 (formerly 2A), catalytic subunit, beta isoform	PPP2CB	1191.83	0.0124155	0.00963291	0.0592472	0.16742	0.867039	0.999995
ENSMUSG00000009633	G0s2	protein_coding	1	G0/G1 switch gene 2	G0S2	129.873	-0.143757	-0.0588033	0.072663	-0.807712	0.419256	0.999995
ENSMUSG00000009640	Dmap1	protein_coding	4	DNA methyltransferase 1-associated protein 1	DMAP1	422.501	-0.0502186	-0.0356798	0.0667391	-0.537864	0.590671	0.999995
ENSMUSG00000009647	Mcu	protein_coding	10	mitochondrial calcium uniporter	MCU	518.148	0.140314	0.10117	0.0663477	1.52337	0.127665	0.999995
ENSMUSG00000009670	Tex11	protein_coding	X	testis expressed gene 11	TEX11	26.7237	0.213183	0.0320593	0.0526198	0.602428	0.546889	0.999995
ENSMUSG00000009681	Bcr	protein_coding	10	BCR activator of RhoGEF and GTPase	BCR	1248.88	-0.0158124	-0.0117446	0.0656041	-0.176028	0.860272	0.999995
ENSMUSG00000009687	Fxyd5	protein_coding	7	FXYD domain-containing ion transport regulator 5	FXYD5	96.8146	0.0770926	0.0301355	0.0725327	0.428833	0.668044	0.999995
ENSMUSG00000009731	Kcnd1	protein_coding	X	potassium voltage-gated channel, Shal-related family, member 1	KCND1	165.371	0.00546858	0.00260984	0.0734048	0.0328887	0.973763	0.999995
ENSMUSG00000009733	Tfcp2	protein_coding	15	transcription factor CP2	TFCP2	544.224	-0.0710763	-0.0530834	0.0647858	-0.812478	0.416517	0.999995
ENSMUSG00000009734	Pou6f2	protein_coding	13	POU domain, class 6, transcription factor 2	POU6F2	27.3966	0.508488	0.0714331	0.0528583	1.44169	0.149389	0.999995
ENSMUSG00000009739	Pou6f1	protein_coding	15	POU domain, class 6, transcription factor 1	POU6F1	1154.52	-0.0939312	-0.0777956	0.0555953	-1.40137	0.161105	0.999995
ENSMUSG00000009741	Ubp1	protein_coding	9	upstream binding protein 1	UBP1	1089.72	-0.0724282	-0.0570896	0.0603425	-0.946641	0.343822	0.999995
ENSMUSG00000009772	Nuak2	protein_coding	1	NUAK family, SNF1-like kinase, 2	NUAK2	23.3683	-0.193344	-0.0252476	0.0501004	-0.509795	0.610195	0.999995
ENSMUSG00000009828	Cilk1	protein_coding	9	ciliogenesis associated kinase 1	CILK1	468.265	0.0370516	0.0255305	0.0684204	0.373193	0.709005	0.999995
ENSMUSG00000009863	Sdhb	protein_coding	4	succinate dehydrogenase complex, subunit B, iron sulfur (Ip)	SDHB	2028.84	0.0106314	0.00869256	0.0573687	0.151084	0.87991	0.999995
ENSMUSG00000009876	Cox4i2	protein_coding	2	cytochrome c oxidase subunit 4I2	COX4I2	19.5642	0.211111	0.0266235	0.0483604	0.530957	0.595449	0.999995
ENSMUSG00000009894	Snap47	protein_coding	11	synaptosomal-associated protein, 47	SNAP47	5451.85	0.0653946	0.0573126	0.0486181	1.1791	0.238358	0.999995
ENSMUSG00000009905	Kdsr	protein_coding	1	3-ketodihydrosphingosine reductase	KDSR	755.175	0.0252681	0.0196907	0.0609304	0.324727	0.745387	0.999995
ENSMUSG00000009907	Vps4b	protein_coding	1	vacuolar protein sorting 4B	VPS4B	1289.02	-0.0325793	-0.0273256	0.0545108	-0.500638	0.616626	0.999995
ENSMUSG00000009927	Rps25	protein_coding	9	ribosomal protein S25	RPS25	2109.04	0.100839	0.0842656	0.0548477	1.53548	0.124665	0.999995
ENSMUSG00000009941	Nxf2	protein_coding	X	nuclear RNA export factor 2	NXF5	1.86635	1.07583	0.00872279	0.0149385	0.728012	0.466606	0.999995
ENSMUSG00000009995	Taz	protein_coding	X	tafazzin	TAZ	787.806	-0.00398354	-0.00283846	0.0624324	-0.0489767	0.960938	0.999995
ENSMUSG00000010021	Kif19a	protein_coding	11	kinesin family member 19A	KIF19	220.799	-0.0649242	-0.0340982	0.0737722	-0.412724	0.679809	0.999995
ENSMUSG00000010025	Aldh3a2	protein_coding	11	aldehyde dehydrogenase family 3, subfamily A2	ALDH3A2	1328.15	0.0784358	0.066417	0.053192	1.24921	0.211588	0.999995
ENSMUSG00000010044	Zmynd10	protein_coding	9	zinc finger, MYND domain containing 10	ZMYND10	20.7026	-0.143505	-0.0152402	0.0486567	-0.363662	0.71611	0.999995
ENSMUSG00000010045	Tmem115	protein_coding	9	transmembrane protein 115	TMEM115	534.49	0.0514682	0.0382491	0.0644989	0.593839	0.55262	0.999995
ENSMUSG00000010047	Hyal2	protein_coding	9	hyaluronoglucosaminidase 2	HYAL2	168.181	-0.0759463	-0.0365835	0.0738711	-0.496695	0.619404	0.999995
ENSMUSG00000010048	Ifrd2	protein_coding	9	interferon-related developmental regulator 2	IFRD2	92.75	-0.0572359	-0.0196915	0.0708748	-0.28914	0.772474	0.999995
ENSMUSG00000010051	Hyal1	protein_coding	9	hyaluronoglucosaminidase 1	HYAL1	103.362	0.21043	0.0848941	0.0727041	1.18588	0.235672	0.999995
ENSMUSG00000010054	Tusc2	protein_coding	9	tumor suppressor 2, mitochondrial calcium regulator	TUSC2	1059.84	0.093316	0.0731466	0.0609581	1.19827	0.230812	0.999995
ENSMUSG00000010057	Nprl2	protein_coding	9	NPR2 like, GATOR1 complex subunit	NPRL2	464.147	0.109242	0.0776379	0.0670392	1.15788	0.246914	0.999995
ENSMUSG00000010064	Slc38a3	protein_coding	9	solute carrier family 38, member 3	SLC38A3	1402.34	0.0335126	0.0261217	0.06103	0.42944	0.667603	0.999995
ENSMUSG00000010066	Cacna2d2	protein_coding	9	calcium channel, voltage-dependent, alpha 2/delta subunit 2	CACNA2D2	1051.93	-0.173987	-0.131492	0.0639339	-2.04317	0.0410356	0.999995
ENSMUSG00000010067	Rassf1	protein_coding	9	Ras association (RalGDS/AF-6) domain family member 1	RASSF1	262.327	0.0977988	0.060888	0.0716558	0.849756	0.395461	0.999995
ENSMUSG00000010080	Epn3	protein_coding	11	epsin 3	EPN3	253.247	-0.173912	-0.097492	0.0733053	-1.3373	0.181124	0.999995
ENSMUSG00000010086	Rnf112	protein_coding	11	ring finger protein 112	RNF112	1625	-0.113629	-0.0863376	0.0635086	-1.35218	0.176318	0.999995
ENSMUSG00000010095	Slc3a2	protein_coding	19	solute carrier family 3 (activators of dibasic and neutral amino acid transport), member 2	SLC3A2	1617.83	-0.0759488	-0.0554984	0.065625	-0.844884	0.398176	0.999995
ENSMUSG00000010097	Nxf1	protein_coding	19	nuclear RNA export factor 1	NXF1	1274.16	-0.0268096	-0.021116	0.0604764	-0.349084	0.727027	0.999995
ENSMUSG00000010110	Stx5a	protein_coding	19	syntaxin 5A	STX5	802.581	-0.110613	-0.0854311	0.0620063	-1.37728	0.168425	0.999995
ENSMUSG00000010136	Pifo	protein_coding	3	primary cilia formation	PIFO	6.35956	0.0114253	0.000367231	0.0283495	0.0153921	0.987719	0.999995
ENSMUSG00000010142	Tnfrsf13b	protein_coding	11	tumor necrosis factor receptor superfamily, member 13b	TNFRSF13B	24.9783	-0.22498	-0.0302825	0.0513076	-0.613127	0.539792	0.999995
ENSMUSG00000010154	Spire2	protein_coding	8	spire type actin nucleation factor 2	SPIRE2	754.222	0.0679804	0.0528682	0.061702	0.854169	0.393011	0.999995
ENSMUSG00000010175	Prox1	protein_coding	1	prospero homeobox 1	PROX1	689.796	-0.0441007	-0.0347415	0.0604588	-0.574496	0.565632	0.999995
ENSMUSG00000010277	2610507B11Rik	protein_coding	11	RIKEN cDNA 2610507B11 gene	KIAA0100	6741.49	-0.0383175	-0.0349835	0.0416245	-0.840623	0.400559	0.999995
ENSMUSG00000010290	AI597479	protein_coding	1	expressed sequence AI597479	C2orf49	774.363	0.0190478	0.015248	0.0588628	0.259652	0.795133	0.999995
ENSMUSG00000010307	Tmem86a	protein_coding	7	transmembrane protein 86A	TMEM86A	152.435	0.120745	0.0588125	0.0738952	0.799086	0.42424	0.999995
ENSMUSG00000010311	Optc	protein_coding	1	opticin	OPTC	10.214	-0.00852944	-0.000583061	0.0368756	-0.0154198	0.987697	0.999995
ENSMUSG00000010342	Tex14	protein_coding	11	testis expressed gene 14	TEX14	30.0614	0.377491	0.061594	0.0555928	1.15538	0.247936	0.999995
ENSMUSG00000010358	Ifi35	protein_coding	11	interferon-induced protein 35	IFI35	64.3612	0.199347	0.0586394	0.0672412	0.866713	0.386099	0.999995
ENSMUSG00000010362	Rdm1	protein_coding	11	RAD52 motif 1	RDM1	74.6349	0.0397527	0.0107504	0.0662867	0.166998	0.867371	0.999995
ENSMUSG00000010376	Nedd8	protein_coding	14	neural precursor cell expressed, developmentally down-regulated gene 8	NEDD8	1144.37	-0.0418018	-0.033532	0.0581678	-0.580989	0.561248	0.999995
ENSMUSG00000010392	Gosr1	protein_coding	11	golgi SNAP receptor complex member 1	GOSR1	1096.94	0.0366128	0.0292284	0.0588837	0.498798	0.617922	0.999995
ENSMUSG00000010406	Mrpl52	protein_coding	14	mitochondrial ribosomal protein L52	MRPL52	201.439	0.151246	0.084035	0.0734624	1.14279	0.253128	0.999995
ENSMUSG00000010453	Kansl3	protein_coding	1	KAT8 regulatory NSL complex subunit 3	KANSL3	1296.68	-0.0709434	-0.0574708	0.0582688	-0.983256	0.325482	0.999995
ENSMUSG00000010461	Eya4	protein_coding	10	EYA transcriptional coactivator and phosphatase 4	EYA4	94.6086	-0.234671	-0.0919773	0.0716484	-1.23277	0.217663	0.999995
ENSMUSG00000010476	Ebf3	protein_coding	7	early B cell factor 3	EBF3	923.386	-0.0417737	-0.0302185	0.0670657	-0.44233	0.65825	0.999995
ENSMUSG00000010492	Uckl1os	antisense	2	uridine-cytidine kinase 1-like 1, opposite strand		18.5071	-0.1902	-0.0145149	0.039801	-0.375658	0.707171	0.999995
ENSMUSG00000010505	Myt1	protein_coding	2	myelin transcription factor 1	MYT1	393.798	-0.0527639	-0.0360974	0.0689195	-0.521048	0.602333	0.999995
ENSMUSG00000010517	Faf1	protein_coding	4	Fas-associated factor 1	FAF1	1263.22	0.0443987	0.0369035	0.0554658	0.664778	0.506192	0.999995
ENSMUSG00000010529	Gm266	protein_coding	12	predicted gene 266		44.8713	-0.157374	-0.0279596	0.0565591	-0.495296	0.620391	0.999995
ENSMUSG00000010538	Tsacc	protein_coding	3	TSSK6 activating co-chaperone	TSACC	15.393	-0.628138	-0.0593583	0.0444429	-1.40124	0.161142	0.999995
ENSMUSG00000010554	Mettl16	protein_coding	11	methyltransferase like 16	METTL16	902.356	0.00789291	0.00630408	0.0595576	0.105504	0.915976	0.999995
ENSMUSG00000010592	Dazl	protein_coding	17	deleted in azoospermia-like	DAZL	9.82471	0.224664	0.0153238	0.0372583	0.41092	0.681131	0.999995
ENSMUSG00000010607	Pigyl	protein_coding	9	phosphatidylinositol glycan anchor biosynthesis, class Y-like	PIGY	251.715	0.00246487	0.00210187	0.0727465	0.0199378	0.984093	0.999995
ENSMUSG00000010608	Rbm25	protein_coding	12	RNA binding motif protein 25	RBM25	2405.27	-0.0327475	-0.0274481	0.0537329	-0.513964	0.607277	0.999995
ENSMUSG00000010609	Psen2	protein_coding	1	presenilin 2	PSEN2	398.075	-0.0865138	-0.0568887	0.07019	-0.809313	0.418335	0.999995
ENSMUSG00000010651	Acaa1b	protein_coding	9	acetyl-Coenzyme A acyltransferase 1B	ACAA1	25.4741	-0.0987819	-0.0116627	0.047952	-0.246079	0.805621	0.999995
ENSMUSG00000010660	Plcd1	protein_coding	9	phospholipase C, delta 1	PLCD1	220.71	-0.0396547	-0.0218736	0.0735334	-0.296892	0.766549	0.999995
ENSMUSG00000010663	Fads1	protein_coding	19	fatty acid desaturase 1	FADS1	3213.62	0.0670527	0.0582062	0.049333	1.18563	0.23577	0.999995
ENSMUSG00000010721	Lmbr1	protein_coding	5	limb region 1	LMBR1	772.347	0.0087449	0.00685775	0.0612074	0.111482	0.911234	0.999995
ENSMUSG00000010751	Tnfrsf22	protein_coding	7	tumor necrosis factor receptor superfamily, member 22		33.6325	0.025556	0.00674437	0.0567027	0.0807704	0.935625	0.999995
ENSMUSG00000010755	Cars	protein_coding	7	cysteinyl-tRNA synthetase	CARS1	750.085	0.0116869	0.00920889	0.0604086	0.15247	0.878816	0.999995
ENSMUSG00000010797	Wnt2	protein_coding	6	wingless-type MMTV integration site family, member 2	WNT2	3.31165	-0.348093	-0.00950315	0.0221885	-0.357952	0.720379	0.999995
ENSMUSG00000010803	Gabra1	protein_coding	11	gamma-aminobutyric acid (GABA) A receptor, subunit alpha 1	GABRA1	965.559	0.118159	0.0867913	0.0653261	1.32744	0.184362	0.999995
ENSMUSG00000010825	Grid2ip	protein_coding	5	glutamate receptor, ionotropic, delta 2 (Grid2) interacting protein 1	GRID2IP	96.4629	0.0185449	0.00626062	0.0711445	0.0949952	0.924319	0.999995
ENSMUSG00000010830	Kdelr3	protein_coding	15	KDEL (Lys-Asp-Glu-Leu) endoplasmic reticulum protein retention receptor 3	KDELR3	13.3797	-0.451416	-0.0354736	0.0401325	-0.89678	0.369836	0.999995
ENSMUSG00000010911	Apip	protein_coding	2	APAF1 interacting protein	APIP	149.577	-0.11892	-0.0568612	0.073757	-0.753479	0.451162	0.999995
ENSMUSG00000010914	Pdhx	protein_coding	2	pyruvate dehydrogenase complex, component X	PDHX	847.073	0.0362956	0.0270225	0.0645231	0.418458	0.675612	0.999995
ENSMUSG00000010936	Vac14	protein_coding	8	Vac14 homolog (S. cerevisiae)	VAC14	601.838	0.0557509	0.0414129	0.0644775	0.64368	0.519783	0.999995
ENSMUSG00000011008	Mcoln2	protein_coding	3	mucolipin 2	MCOLN2	1.41393	0.84332	0.00721789	0.0139529	0.537389	0.590999	0.999995
ENSMUSG00000011034	Slc5a1	protein_coding	5	solute carrier family 5 (sodium/glucose cotransporter), member 1	SLC5A1	10.1286	0.389336	0.0243954	0.0354763	0.671686	0.501784	0.999995
ENSMUSG00000011096	Akt1s1	protein_coding	7	AKT1 substrate 1 (proline-rich)	AKT1S1	597.299	0.159823	0.120747	0.0634754	1.90381	0.0569345	0.999995
ENSMUSG00000011114	Tbrg1	protein_coding	9	transforming growth factor beta regulated gene 1	TBRG1	477.853	0.053724	0.0389437	0.0659502	0.591206	0.554382	0.999995
ENSMUSG00000011148	Adssl1	protein_coding	12	adenylosuccinate synthetase like 1	ADSS1	774.304	-0.0609003	-0.0466027	0.0624505	-0.748353	0.454247	0.999995
ENSMUSG00000011154	Cfap161	protein_coding	7	cilia and flagella associated protein 161	CFAP161	19.4573	0.15075	0.0123771	0.0440757	0.336238	0.736691	0.999995
ENSMUSG00000011158	Brf1	protein_coding	12	BRF1, RNA polymerase III transcription initiation factor 90 kDa subunit	BRF1	611.471	-0.0141952	-0.0101802	0.0662074	-0.154859	0.876933	0.999995
ENSMUSG00000011171	Vipr2	protein_coding	12	vasoactive intestinal peptide receptor 2	VIPR2	89.016	-0.11531	-0.0385582	0.0700844	-0.561091	0.574736	0.999995
ENSMUSG00000011179	Odc1	protein_coding	12	ornithine decarboxylase, structural 1	ODC1	1551.54	0.0965965	0.0721121	0.0625985	1.18177	0.237296	0.999995
ENSMUSG00000011254	Thg1l	protein_coding	11	tRNA-histidine guanylyltransferase 1-like (S. cerevisiae)	THG1L	122.705	0.109519	0.0434882	0.0723056	0.600256	0.548336	0.999995
ENSMUSG00000011256	Adam19	protein_coding	11	a disintegrin and metallopeptidase domain 19 (meltrin beta)	ADAM19	562.996	-0.203293	-0.13302	0.0703802	-1.88494	0.0594376	0.999995
ENSMUSG00000011257	Pabpc4	protein_coding	4	poly(A) binding protein, cytoplasmic 4	PABPC4	471.082	0.0179354	0.0123363	0.0677105	0.185548	0.852799	0.999995
ENSMUSG00000011263	Exoc3l2	protein_coding	7	exocyst complex component 3-like 2	EXOC3L2	37.7864	0.0829559	0.0150834	0.0585533	0.276057	0.782504	0.999995
ENSMUSG00000011267	Zfp296	protein_coding	7	zinc finger protein 296	ZNF296	8.03762	-0.462932	-0.033916	0.0314951	-0.682556	0.494887	0.999995
ENSMUSG00000011305	Plin5	protein_coding	17	perilipin 5	PLIN5	12.0699	-0.585043	-0.0430759	0.0386885	-1.1014	0.270721	0.999995
ENSMUSG00000011306	Sugp1	protein_coding	8	SURP and G patch domain containing 1	SUGP1	847.581	-0.0986699	-0.0763647	0.0618234	-1.23526	0.216732	0.999995
ENSMUSG00000011382	Dhdh	protein_coding	7	dihydrodiol dehydrogenase (dimeric)	DHDH	163.972	-0.0789335	-0.0344397	0.073858	-0.513506	0.607597	0.999995
ENSMUSG00000011427	Zfp790	protein_coding	7	zinc finger protein 790	ZNF790	392.956	0.0457692	0.031654	0.0689047	0.452287	0.651062	0.999995
ENSMUSG00000011589	Fsd1	protein_coding	17	fibronectin type 3 and SPRY domain-containing protein	FSD1	806.948	-0.0802241	-0.0632918	0.0605637	-1.0419	0.297458	0.999995
ENSMUSG00000011658	Fuz	protein_coding	7	fuzzy planar cell polarity protein	FUZ	215.107	-0.173105	-0.0962983	0.0734505	-1.3093	0.190434	0.999995
ENSMUSG00000011751	Sptbn4	protein_coding	7	spectrin beta, non-erythrocytic 4	SPTBN4	2235.02	-0.0515149	-0.0402448	0.06253	-0.631546	0.527683	0.999995
ENSMUSG00000011752	Pgam1	protein_coding	19	phosphoglycerate mutase 1	PGAM1	2349.95	0.0108755	0.00948277	0.0494172	0.191866	0.847847	0.999995
ENSMUSG00000011831	Evi5	protein_coding	5	ecotropic viral integration site 5	EVI5	1794.61	-0.0595565	-0.0473153	0.0597373	-0.792032	0.428342	0.999995
ENSMUSG00000011832	Evi5l	protein_coding	8	ecotropic viral integration site 5 like	EVI5L	2095.9	0.0284557	0.0243887	0.0515951	0.473216	0.636059	0.999995
ENSMUSG00000011837	Snapc2	protein_coding	8	small nuclear RNA activating complex, polypeptide 2	SNAPC2	395.001	0.0694719	0.0486604	0.0675157	0.723851	0.469157	0.999995
ENSMUSG00000011877	Git1	protein_coding	11	GIT ArfGAP 1	GIT1	2191.36	-0.0143922	-0.0110885	0.0625986	-0.17608	0.860231	0.999995
ENSMUSG00000011884	Gltp	protein_coding	5	glycolipid transfer protein	GLTP	1190.6	-0.0718443	-0.0563692	0.0607235	-0.928812	0.352986	0.999995
ENSMUSG00000011958	Bnip2	protein_coding	9	BCL2/adenovirus E1B interacting protein 2	BNIP2	565.547	0.0338729	0.0240194	0.0671877	0.357136	0.72099	0.999995
ENSMUSG00000011960	Ccnt1	protein_coding	15	cyclin T1	CCNT1	963.57	0.0250057	0.0204269	0.0575808	0.353276	0.723882	0.999995
ENSMUSG00000012017	Scarf2	protein_coding	16	scavenger receptor class F, member 2	SCARF2	43.1125	-0.116731	-0.025342	0.0625495	-0.435239	0.663389	0.999995
ENSMUSG00000012076	Brms1l	protein_coding	12	breast cancer metastasis-suppressor 1-like	BRMS1L	1082.74	0.0551932	0.0451726	0.0567452	0.797952	0.424898	0.999995
ENSMUSG00000012114	Med15	protein_coding	16	mediator complex subunit 15	MED15	438.589	-0.187599	-0.126959	0.069088	-1.83953	0.0658372	0.999995
ENSMUSG00000012117	Dhdds	protein_coding	4	dehydrodolichyl diphosphate synthase	DHDDS	1095.91	-0.00309452	-0.00256377	0.056159	-0.0454637	0.963738	0.999995
ENSMUSG00000012123	Crybg2	protein_coding	4	crystallin beta-gamma domain containing 2	CRYBG2	17.0253	-0.0414739	-0.00497456	0.0437489	-0.0919207	0.926761	0.999995
ENSMUSG00000012126	Ubxn11	protein_coding	4	UBX domain protein 11	UBXN11	137.015	-0.156234	-0.0714764	0.0736617	-0.972644	0.33073	0.999995
ENSMUSG00000012187	Mogat1	protein_coding	1	monoacylglycerol O-acyltransferase 1	MOGAT1	23.737	-0.010042	-0.00229055	0.0513344	-0.027353	0.978178	0.999995
ENSMUSG00000012211	Tex22	protein_coding	12	testis expressed gene 22	TEX22	11.6675	-0.246101	-0.0223458	0.038099	-0.459773	0.645679	0.999995
ENSMUSG00000012296	Tjap1	protein_coding	17	tight junction associated protein 1	TJAP1	410.023	0.00748009	0.00511666	0.0712959	0.0662911	0.947146	0.999995
ENSMUSG00000012396	Nanog	protein_coding	6	Nanog homeobox	NANOG	1.37341	-1.23117	-0.0115781	0.0144827	-0.783085	0.433577	0.999995
ENSMUSG00000012405	Rpl15	protein_coding	14	ribosomal protein L15	RPL15	2038.07	0.108941	0.0920705	0.0534569	1.72265	0.0849524	0.999995
ENSMUSG00000012422	Tmem167	protein_coding	13	transmembrane protein 167	TMEM167A	1124.35	-0.0422365	-0.0339594	0.0588935	-0.575248	0.565124	0.999995
ENSMUSG00000012428	Steap4	protein_coding	5	STEAP family member 4	STEAP4	13.2628	-1.89835	-0.029751	0.017245	-1.4652	0.142867	0.999995
ENSMUSG00000012429	Mplkip	protein_coding	13	M-phase specific PLK1 intereacting protein	MPLKIP	203.012	0.129307	0.0720225	0.0734468	0.978932	0.327614	0.999995
ENSMUSG00000012443	Kif11	protein_coding	19	kinesin family member 11	KIF11	34.1725	0.129838	0.0255137	0.0572734	0.416713	0.676888	0.999995
ENSMUSG00000012483	Rpa3	protein_coding	6	replication protein A3	RPA3	110.102	0.224831	0.0824852	0.0715376	1.17586	0.239652	0.999995
ENSMUSG00000012519	Mlkl	protein_coding	8	mixed lineage kinase domain-like	MLKL	10.2611	0.439762	0.0234439	0.0349847	0.745212	0.456143	0.999995
ENSMUSG00000012535	Tnpo3	protein_coding	6	transportin 3	TNPO3	1702.69	0.0537071	0.0461032	0.0515396	0.894491	0.371059	0.999995
ENSMUSG00000012609	Ttll5	protein_coding	12	tubulin tyrosine ligase-like family, member 5	TTLL5	2073.11	0.0586732	0.0503187	0.0511219	0.988311	0.323	0.999995
ENSMUSG00000012640	Zfp715	protein_coding	7	zinc finger protein 715	ZNF175	533.814	0.0181577	0.0128596	0.0666008	0.195433	0.845054	0.999995
ENSMUSG00000012819	Cdh23	protein_coding	10	cadherin 23 (otocadherin)	CDH23	174.493	-0.143334	-0.0691006	0.0738988	-0.950454	0.341882	0.999995
ENSMUSG00000012848	Rps5	protein_coding	7	ribosomal protein S5	RPS5	2273.14	0.139487	0.115856	0.0555234	2.08524	0.037048	0.999995
ENSMUSG00000013033	Adgrl1	protein_coding	8	adhesion G protein-coupled receptor L1	ADGRL1	3737.06	-0.0826883	-0.0682489	0.0565217	-1.20281	0.229051	0.999995
ENSMUSG00000013076	Amotl1	protein_coding	9	angiomotin-like 1	AMOTL1	1707.93	-0.050378	-0.0412088	0.056952	-0.724192	0.468948	0.999995
ENSMUSG00000013089	Etv5	protein_coding	16	ets variant 5	ETV5	760.45	0.0409064	0.0303385	0.0633638	0.488967	0.624865	0.999995
ENSMUSG00000013150	Gfod2	protein_coding	8	glucose-fructose oxidoreductase domain containing 2	GFOD2	379.986	0.0376027	0.025884	0.0685703	0.376517	0.706532	0.999995
ENSMUSG00000013155	Enkd1	protein_coding	8	enkurin domain containing 1	ENKD1	64.1082	-0.0761425	-0.0229805	0.0678143	-0.337991	0.73537	0.999995
ENSMUSG00000013160	Atp6v0d1	protein_coding	8	ATPase, H+ transporting, lysosomal V0 subunit D1	ATP6V0D1	2570.41	0.0455947	0.0404081	0.04712	0.85657	0.391683	0.999995
ENSMUSG00000013236	Ptprs	protein_coding	17	protein tyrosine phosphatase, receptor type, S	PTPRS	5296.02	-0.0516607	-0.0442019	0.0522373	-0.844311	0.398496	0.999995
ENSMUSG00000013275	Slc41a1	protein_coding	1	solute carrier family 41, member 1	SLC41A1	1958.94	0.0697357	0.0593647	0.0526638	1.12665	0.259892	0.999995
ENSMUSG00000013367	Iglon5	protein_coding	7	IgLON family member 5	IGLON5	432.356	-0.0696526	-0.0380012	0.0735856	-0.51776	0.604626	0.999995
ENSMUSG00000013419	Zfp651	protein_coding	9	zinc finger protein 651	ZBTB47	1312.99	0.0552363	0.0429368	0.061078	0.70683	0.479672	0.999995
ENSMUSG00000013465	Nelfb	protein_coding	2	negative elongation factor complex member B	NELFB	788.725	-0.0280368	-0.0211836	0.0633633	-0.335128	0.737528	0.999995
ENSMUSG00000013483	Card14	protein_coding	11	caspase recruitment domain family, member 14	CARD14	15.1338	-0.321156	-0.0301651	0.0432653	-0.700087	0.483873	0.999995
ENSMUSG00000013495	Tmem175	protein_coding	5	transmembrane protein 175	TMEM175	511.459	0.0284673	0.0198685	0.067558	0.296155	0.767111	0.999995
ENSMUSG00000013523	Bcas1	protein_coding	2	breast carcinoma amplified sequence 1	BCAS1	8471.13	0.0244096	0.021707	0.0460673	0.472117	0.636843	0.999995
ENSMUSG00000013539	Tango2	protein_coding	16	transport and golgi organization 2	TANGO2	1192.91	-0.0303329	-0.0246016	0.0578662	-0.425152	0.670726	0.999995
ENSMUSG00000013584	Aldh1a2	protein_coding	9	aldehyde dehydrogenase family 1, subfamily A2	ALDH1A2	54.6553	-0.8425	-0.0407481	0.0296982	-1.19151	0.233454	0.999995
ENSMUSG00000013593	Ndufs2	protein_coding	1	NADH:ubiquinone oxidoreductase core subunit S2	NDUFS2	4383.87	-0.0629227	-0.0499258	0.0591117	-0.851753	0.394351	0.999995
ENSMUSG00000013622	Atraid	protein_coding	5	all-trans retinoic acid induced differentiation factor	ATRAID	716.378	0.012118	0.00910184	0.0628238	0.147253	0.882932	0.999995
ENSMUSG00000013629	Cad	protein_coding	5	carbamoyl-phosphate synthetase 2, aspartate transcarbamylase, and dihydroorotase	CAD	368.731	-0.117074	-0.0738468	0.0712475	-1.04007	0.298309	0.999995
ENSMUSG00000013646	Sh3bp5l	protein_coding	11	SH3 binding domain protein 5 like	SH3BP5L	1178.75	-0.00628341	-0.00502412	0.0580041	-0.0877332	0.930089	0.999995
ENSMUSG00000013662	Atad1	protein_coding	19	ATPase family, AAA domain containing 1	ATAD1	2116.63	0.0403495	0.0335601	0.0550003	0.61186	0.54063	0.999995
ENSMUSG00000013663	Pten	protein_coding	19	phosphatase and tensin homolog	PTEN	3038.7	0.0272345	0.024267	0.0460162	0.527503	0.597845	0.999995
ENSMUSG00000013698	Pea15a	protein_coding	1	phosphoprotein enriched in astrocytes 15A	PEA15	10296	-0.0520896	-0.045256	0.049081	-0.927409	0.353714	0.999995
ENSMUSG00000013701	Timm23	protein_coding	14	translocase of inner mitochondrial membrane 23	TIMM23,TIMM23B	754.308	0.014507	0.0113327	0.0619375	0.181017	0.856354	0.999995
ENSMUSG00000013707	Tnfaip8l2	protein_coding	3	tumor necrosis factor, alpha-induced protein 8-like 2	TNFAIP8L2	26.845	0.0545702	0.00896889	0.0530743	0.156279	0.875813	0.999995
ENSMUSG00000013736	Trnt1	protein_coding	6	tRNA nucleotidyl transferase, CCA-adding, 1	TRNT1	831.138	-0.0170879	-0.0126599	0.0629536	-0.206828	0.836145	0.999995
ENSMUSG00000013766	Ly6g6e	protein_coding	17	lymphocyte antigen 6 complex, locus G6E	LY6G6E	24.2739	-0.215105	-0.0317588	0.0525844	-0.607039	0.543825	0.999995
ENSMUSG00000013787	Ehmt2	protein_coding	17	euchromatic histone lysine N-methyltransferase 2	EHMT2	1841.51	-0.0147492	-0.0126317	0.0522972	-0.24066	0.809819	0.999995
ENSMUSG00000013822	Elof1	protein_coding	9	ELF1 homolog, elongation factor 1	ELOF1	517.881	0.0767326	0.0533709	0.0681257	0.781628	0.434433	0.999995
ENSMUSG00000013833	Med16	protein_coding	10	mediator complex subunit 16	MED16	412.493	-0.0280364	-0.0189847	0.0711056	-0.250948	0.801854	0.999995
ENSMUSG00000013846	St3gal1	protein_coding	15	ST3 beta-galactoside alpha-2,3-sialyltransferase 1	ST3GAL1	257.075	0.125761	0.0672782	0.0738648	0.881971	0.377792	0.999995
ENSMUSG00000013858	Tmem259	protein_coding	10	transmembrane protein 259	TMEM259	1298.38	-0.0240874	-0.0201926	0.0540295	-0.375016	0.707649	0.999995
ENSMUSG00000013878	Rnf170	protein_coding	8	ring finger protein 170	RNF170	692.769	0.0318761	0.0247637	0.0613923	0.404178	0.686082	0.999995
ENSMUSG00000013921	Clip3	protein_coding	7	CAP-GLY domain containing linker protein 3	CLIP3	1128.67	-0.190325	-0.140457	0.0650907	-2.15441	0.0312084	0.999995
ENSMUSG00000013928	Thap8	protein_coding	7	THAP domain containing 8		5.79905	-0.0556044	-0.00119225	0.028192	-0.0744798	0.940629	0.999995
ENSMUSG00000013936	Myl2	protein_coding	5	myosin, light polypeptide 2, regulatory, cardiac, slow	MYL2	6.3414	-0.566287	-0.0239039	0.0302278	-0.81087	0.417441	0.999995
ENSMUSG00000013973	Dedd	protein_coding	1	death effector domain-containing	DEDD	383.308	-0.0213498	-0.0146152	0.0709567	-0.192555	0.847307	0.999995
ENSMUSG00000013997	Nit1	protein_coding	1	nitrilase 1	NIT1	411.757	0.175742	0.10361	0.0731828	1.36888	0.171037	0.999995
ENSMUSG00000014030	Pax5	protein_coding	4	paired box 5	PAX5	8.64685	-0.146341	-0.0087105	0.0336641	-0.238096	0.811806	0.999995
ENSMUSG00000014039	Prdm15	protein_coding	16	PR domain containing 15	PRDM15	295.69	-0.169565	-0.105264	0.0714753	-1.48746	0.136894	0.999995
ENSMUSG00000014074	Rnf168	protein_coding	16	ring finger protein 168	RNF168	914.016	0.0793082	0.0637109	0.0584794	1.09278	0.274492	0.999995
ENSMUSG00000014075	Tctex1d2	protein_coding	16	Tctex1 domain containing 2		132.186	0.114926	0.0385227	0.0714874	0.59946	0.548866	0.999995
ENSMUSG00000014077	Chp1	protein_coding	2	calcineurin-like EF hand protein 1	CHP1	2827.6	-0.0753439	-0.0650094	0.0509775	-1.27408	0.202636	0.999995
ENSMUSG00000014158	Trpv4	protein_coding	5	transient receptor potential cation channel, subfamily V, member 4	TRPV4	16.6857	-0.118967	-0.0133278	0.0455414	-0.277038	0.781751	0.999995
ENSMUSG00000014164	Klhl3	protein_coding	13	kelch-like 3	KLHL3	175.374	-0.106124	-0.0536174	0.0739088	-0.725054	0.468419	0.999995
ENSMUSG00000014177	Tvp23b	protein_coding	11	trans-golgi network vesicle protein 23B	TVP23B	477.911	0.17076	0.122535	0.0665504	1.84099	0.0656224	0.999995
ENSMUSG00000014195	Dnajc7	protein_coding	11	DnaJ heat shock protein family (Hsp40) member C7	DNAJC7	2248.9	-0.0534832	-0.0466905	0.0492559	-0.947689	0.343288	0.999995
ENSMUSG00000014198	Zfp385c	protein_coding	11	zinc finger protein 385C	ZNF385C	8.63085	0.437986	0.0260877	0.0349342	0.741607	0.458325	0.999995
ENSMUSG00000014226	Cacybp	protein_coding	1	calcyclin binding protein	CACYBP	1346.67	0.0524474	0.0418037	0.0590972	0.71025	0.477549	0.999995
ENSMUSG00000014232	Cluap1	protein_coding	16	clusterin associated protein 1	CLUAP1	325.312	0.012805	0.00848309	0.0698571	0.121591	0.903223	0.999995
ENSMUSG00000014243	Zswim7	protein_coding	11	zinc finger SWIM-type containing 7	ZSWIM7	131.909	0.043761	0.0198563	0.0738374	0.28292	0.777238	0.999995
ENSMUSG00000014245	Pigl	protein_coding	11	phosphatidylinositol glycan anchor biosynthesis, class L	PIGL	83.6405	0.0576464	0.0207178	0.0710517	0.293864	0.768862	0.999995
ENSMUSG00000014294	Ndufa2	protein_coding	18	NADH:ubiquinone oxidoreductase subunit A2	NDUFA2	798.749	0.0218817	0.0160636	0.0662673	0.238229	0.811703	0.999995
ENSMUSG00000014301	Pam16	protein_coding	16	presequence translocase-asssociated motor 16 homolog (S. cerevisiae)	PAM16	263.37	-0.0123623	-0.00787964	0.0720985	-0.104603	0.916691	0.999995
ENSMUSG00000014303	Glis2	protein_coding	16	GLIS family zinc finger 2	GLIS2	95.7525	-0.166276	-0.0620359	0.0715973	-0.872084	0.383162	0.999995
ENSMUSG00000014313	Cox6c	protein_coding	15	cytochrome c oxidase subunit 6C	COX6C	2829.73	0.071289	0.0576604	0.0576423	1.00544	0.314683	0.999995
ENSMUSG00000014329	Bicc1	protein_coding	10	BicC family RNA binding protein 1	BICC1	174.472	-0.136745	-0.0708521	0.0738824	-0.951514	0.341343	0.999995
ENSMUSG00000014349	Ube2z	protein_coding	11	ubiquitin-conjugating enzyme E2Z	UBE2Z	1337.46	0.0387308	0.0327875	0.0530187	0.619747	0.535424	0.999995
ENSMUSG00000014353	Tmem87b	protein_coding	2	transmembrane protein 87B	TMEM87B	1106.08	0.0625592	0.0507236	0.0579112	0.875763	0.381159	0.999995
ENSMUSG00000014355	Anapc1	protein_coding	2	anaphase promoting complex subunit 1	ANAPC1	2449.48	0.00858431	0.00761766	0.0473149	0.160407	0.872561	0.999995
ENSMUSG00000014361	Mertk	protein_coding	2	MER proto-oncogene tyrosine kinase	MERTK	341.85	-0.0105899	-0.00750333	0.0706269	-0.0970701	0.922671	0.999995
ENSMUSG00000014402	Tsg101	protein_coding	7	tumor susceptibility gene 101	TSG101	1052.5	0.0220808	0.017844	0.0580046	0.308306	0.75785	0.999995
ENSMUSG00000014418	Hps5	protein_coding	7	HPS5, biogenesis of lysosomal organelles complex 2 subunit 2	HPS5	443.726	-0.0258007	-0.0178848	0.0672042	-0.271844	0.785742	0.999995
ENSMUSG00000014426	Map3k4	protein_coding	17	mitogen-activated protein kinase kinase kinase 4	MAP3K4	1493.51	-0.0720212	-0.0569117	0.0603143	-0.942137	0.346122	0.999995
ENSMUSG00000014444	Piezo1	protein_coding	8	piezo-type mechanosensitive ion channel component 1	PIEZO1	55.3573	-0.363376	-0.0774503	0.0604797	-1.27245	0.203215	0.999995
ENSMUSG00000014453	Blk	protein_coding	14	B lymphoid kinase	BLK	0.572905	-1.28362	-0.00487289	0.00852346	-0.505445	0.613247	0.999995
ENSMUSG00000014470	Rnf166	protein_coding	8	ring finger protein 166	RNF166	320.178	0.175681	0.117116	0.0696835	1.68065	0.0928315	0.999995
ENSMUSG00000014496	Ankrd28	protein_coding	14	ankyrin repeat domain 28	ANKRD28	2908.67	-0.0650117	-0.0569928	0.0486853	-1.17003	0.24199	0.999995
ENSMUSG00000014498	Ankrd52	protein_coding	10	ankyrin repeat domain 52	ANKRD52	747.684	-0.0295295	-0.0208758	0.0670214	-0.313182	0.754143	0.999995
ENSMUSG00000014503	Pkd2l2	protein_coding	18	polycystic kidney disease 2-like 2	PKD2L2	10.2697	1.00098	0.0637346	0.0367521	1.77201	0.076393	0.999995
ENSMUSG00000014504	Srp19	protein_coding	18	signal recognition particle 19	SRP19	468.79	0.0242627	0.0167338	0.0676426	0.251634	0.801324	0.999995
ENSMUSG00000014547	Wdfy2	protein_coding	14	WD repeat and FYVE domain containing 2	WDFY2	1322.1	0.0732238	0.061593	0.0539735	1.14177	0.25355	0.999995
ENSMUSG00000014550	Rbsn	protein_coding	6	rabenosyn, RAB effector	RBSN	1360.54	0.0412387	0.035408	0.0515834	0.686014	0.492704	0.999995
ENSMUSG00000014551	Mrps25	protein_coding	6	mitochondrial ribosomal protein S25	MRPS25	647.354	0.0376446	0.0294365	0.0609967	0.482852	0.629201	0.999995
ENSMUSG00000014554	Dguok	protein_coding	6	deoxyguanosine kinase	DGUOK	261.375	0.00707149	0.00425526	0.0726166	0.0577678	0.953934	0.999995
ENSMUSG00000014592	Camta1	protein_coding	4	calmodulin binding transcription activator 1	CAMTA1	5465.79	-0.0122912	-0.0104272	0.0525696	-0.199082	0.842198	0.999995
ENSMUSG00000014599	Csf1	protein_coding	3	colony stimulating factor 1 (macrophage)	CSF1	938.514	-0.0438524	-0.0323005	0.064386	-0.50777	0.611615	0.999995
ENSMUSG00000014601	Strip1	protein_coding	3	striatin interacting protein 1	STRIP1	1156.36	-0.026478	-0.0220613	0.0552358	-0.398938	0.689939	0.999995
ENSMUSG00000014602	Kif1a	protein_coding	1	kinesin family member 1A	KIF1A	24524.6	-0.00973852	-0.00783136	0.0597993	-0.129285	0.897132	0.999995
ENSMUSG00000014606	Slc25a11	protein_coding	11	solute carrier family 25 (mitochondrial carrier oxoglutarate carrier), member 11	SLC25A11	1592.59	0.0250641	0.0207349	0.0559578	0.370272	0.71118	0.999995
ENSMUSG00000014633	Cmc2	protein_coding	8	COX assembly mitochondrial protein 2	CMC2	235.624	-0.00935606	-0.00610334	0.0726407	-0.0762867	0.939191	0.999995
ENSMUSG00000014668	Chfr	protein_coding	5	checkpoint with forkhead and ring finger domains	CHFR	572.344	-0.0724524	-0.0546418	0.0638514	-0.853045	0.393634	0.999995
ENSMUSG00000014704	Hoxa2	protein_coding	6	homeobox A2	HOXA2	48.7771	-0.535917	-0.1287	0.0632769	-2.03441	0.0419103	0.999995
ENSMUSG00000014748	Tex261	protein_coding	6	testis expressed gene 261	TEX261	667.431	0.12652	0.096004	0.0631682	1.52143	0.128153	0.999995
ENSMUSG00000014763	Fam120b	protein_coding	17	family with sequence similarity 120, member B	FAM120B	2238.5	0.0198572	0.0175596	0.0476203	0.367949	0.712911	0.999995
ENSMUSG00000014767	Tbp	protein_coding	17	TATA box binding protein	TBP	439.864	0.0116044	0.0080348	0.0676421	0.120353	0.904203	0.999995
ENSMUSG00000014769	Psmb1	protein_coding	17	proteasome (prosome, macropain) subunit, beta type 1	PSMB1	1923.56	0.0663003	0.0535859	0.0583183	0.917673	0.35879	0.999995
ENSMUSG00000014771	Pdcd2	protein_coding	17	programmed cell death 2	PDCD2	238.245	0.103982	0.0575999	0.0733938	0.79218	0.428256	0.999995
ENSMUSG00000014773	Dll1	protein_coding	17	delta like canonical Notch ligand 1	DLL1	148.441	-0.2761	-0.134105	0.0738874	-1.81721	0.0691855	0.999995
ENSMUSG00000014776	Nol3	protein_coding	8	nucleolar protein 3 (apoptosis repressor with CARD domain)	NOL3	437.338	-0.090028	-0.0587534	0.0714651	-0.790462	0.429258	0.999995
ENSMUSG00000014778	Fhod1	protein_coding	8	formin homology 2 domain containing 1	FHOD1	36.4028	-0.160025	-0.0260816	0.0566656	-0.502831	0.615083	0.999995
ENSMUSG00000014782	Plekhg4	protein_coding	8	pleckstrin homology domain containing, family G (with RhoGef domain) member 4	PLEKHG4	29.39	-0.287837	-0.0387951	0.0519255	-0.797168	0.425354	0.999995
ENSMUSG00000014786	Slc9a5	protein_coding	8	solute carrier family 9 (sodium/hydrogen exchanger), member 5	SLC9A5	331.417	-0.114441	-0.0759702	0.0697679	-1.09056	0.275465	0.999995
ENSMUSG00000014791	Elmo3	protein_coding	8	engulfment and cell motility 3	ELMO3	33.7713	-0.110379	-0.0189993	0.0571587	-0.352748	0.724277	0.999995
ENSMUSG00000014813	Stc1	protein_coding	14	stanniocalcin 1	STC1	37.3146	0.297202	0.0626872	0.0597686	1.02026	0.307603	0.999995
ENSMUSG00000014837	4931428F04Rik	protein_coding	8	RIKEN cDNA 4931428F04 gene	KIAA0895L	145.299	0.0178252	0.0090274	0.0737426	0.112644	0.910313	0.999995
ENSMUSG00000014846	Tppp3	protein_coding	8	tubulin polymerization-promoting protein family member 3	TPPP3	3357.05	-0.144097	-0.11753	0.0569417	-2.07196	0.0382695	0.999995
ENSMUSG00000014850	Msh3	protein_coding	13	mutS homolog 3	MSH3	599.398	0.0325951	0.0242895	0.064389	0.377394	0.70588	0.999995
ENSMUSG00000014856	Tmem208	protein_coding	8	transmembrane protein 208	TMEM208	342.99	0.0351239	0.0229839	0.0703017	0.326936	0.743716	0.999995
ENSMUSG00000014859	E2f4	protein_coding	8	E2F transcription factor 4	E2F4	249.597	-0.0548002	-0.033019	0.0724293	-0.453656	0.650076	0.999995
ENSMUSG00000014867	Surf4	protein_coding	2	surfeit gene 4	SURF4	1112.18	0.0812175	0.067324	0.0556856	1.20879	0.226745	0.999995
ENSMUSG00000014873	Surf2	protein_coding	2	surfeit gene 2	SURF2	460.44	-0.0652891	-0.0455985	0.0673261	-0.684888	0.493414	0.999995
ENSMUSG00000014905	Dnajb9	protein_coding	12	DnaJ heat shock protein family (Hsp40) member B9	DNAJB9	591.96	-0.0159916	-0.0123231	0.0627886	-0.194526	0.845764	0.999995
ENSMUSG00000014907	Naf1	protein_coding	8	nuclear assembly factor 1 ribonucleoprotein	NAF1	101.625	-0.192377	-0.076151	0.0725224	-1.06924	0.284959	0.999995
ENSMUSG00000014932	Yes1	protein_coding	5	YES proto-oncogene 1, Src family tyrosine kinase	YES1	518.758	-0.0809156	-0.0572087	0.0676488	-0.83893	0.401509	0.999995
ENSMUSG00000014956	Ppp1cb	protein_coding	5	protein phosphatase 1 catalytic subunit beta	PPP1CB	5752.2	-0.0365882	-0.0332587	0.0431034	-0.769205	0.441772	0.999995
ENSMUSG00000014959	Gorasp2	protein_coding	2	golgi reassembly stacking protein 2	GORASP2	1281.7	-0.0135588	-0.0113435	0.0546391	-0.207633	0.835515	0.999995
ENSMUSG00000014980	Tsen15	protein_coding	1	tRNA splicing endonuclease subunit 15	TSEN15	299.8	-0.0886691	-0.0556288	0.0710799	-0.794572	0.426863	0.999995
ENSMUSG00000015002	Efr3a	protein_coding	15	EFR3 homolog A	EFR3A	4408.06	-0.00625595	-0.005318	0.0534768	-0.0988704	0.921241	0.999995
ENSMUSG00000015013	Trappc2l	protein_coding	8	trafficking protein particle complex 2-like	TRAPPC2L	449.023	0.0172954	0.0120185	0.0678895	0.177744	0.858924	0.999995
ENSMUSG00000015016	Acsf3	protein_coding	8	acyl-CoA synthetase family member 3	ACSF3	292.895	-0.0358495	-0.0221962	0.0717745	-0.309351	0.757055	0.999995
ENSMUSG00000015023	Ddx19a	protein_coding	8	DEAD (Asp-Glu-Ala-Asp) box polypeptide 19a	DDX19A	244.601	-0.0861712	-0.0491802	0.0731761	-0.671602	0.501837	0.999995
ENSMUSG00000015027	Galns	protein_coding	8	galactosamine (N-acetyl)-6-sulfate sulfatase	GALNS	125.508	0.110518	0.0468847	0.0734949	0.671708	0.501769	0.999995
ENSMUSG00000015053	Gata2	protein_coding	6	GATA binding protein 2	GATA2	45.0307	-0.431317	-0.0975727	0.0622498	-1.58991	0.111855	0.999995
ENSMUSG00000015083	C8g	protein_coding	2	complement component 8, gamma polypeptide	C8G	16.0731	-0.211265	-0.0198002	0.0450913	-0.48519	0.627541	0.999995
ENSMUSG00000015085	Entpd2	protein_coding	2	ectonucleoside triphosphate diphosphohydrolase 2	ENTPD2	120.301	-0.334243	-0.127827	0.0716427	-1.75195	0.0797831	0.999995
ENSMUSG00000015087	Rabl6	protein_coding	2	RAB, member RAS oncogene family-like 6	RABL6	2399.2	0.0313116	0.0270096	0.0510588	0.528328	0.597272	0.999995
ENSMUSG00000015090	Ptgds	protein_coding	2	prostaglandin D2 synthase (brain)	PTGDS	3212	-0.75219	-0.111643	0.0533199	-2.16849	0.0301211	0.999995
ENSMUSG00000015092	Edf1	protein_coding	2	endothelial differentiation-related factor 1	EDF1	940.371	-0.100742	-0.0811044	0.0584528	-1.38905	0.164818	0.999995
ENSMUSG00000015094	Npdc1	protein_coding	2	neural proliferation, differentiation and control 1	NPDC1	1438.91	-0.0116532	-0.00946586	0.0582466	-0.161615	0.871609	0.999995
ENSMUSG00000015095	Fbxw5	protein_coding	2	F-box and WD-40 domain protein 5	FBXW5	1072.9	-0.0631047	-0.0490201	0.0623717	-0.777272	0.436998	0.999995
ENSMUSG00000015112	Slc25a13	protein_coding	6	solute carrier family 25 (mitochondrial carrier, adenine nucleotide translocator), member 13	SLC25A13	295.804	0.077678	0.0478354	0.0718939	0.665634	0.505645	0.999995
ENSMUSG00000015120	Ube2i	protein_coding	17	ubiquitin-conjugating enzyme E2I	UBE2I	1187.32	0.00541551	0.00452078	0.0558454	0.0802491	0.936039	0.999995
ENSMUSG00000015126	Tsr3	protein_coding	17	TSR3 20S rRNA accumulation	TSR3	329.435	0.0204648	0.0131559	0.0708186	0.185855	0.852559	0.999995
ENSMUSG00000015127	Unkl	protein_coding	17	unkempt family like zinc finger	UNKL	295.286	-0.091501	-0.0566121	0.0716816	-0.793675	0.427384	0.999995
ENSMUSG00000015133	Lrrk1	protein_coding	7	leucine-rich repeat kinase 1	LRRK1	85.0067	-0.0525499	-0.0179584	0.0707964	-0.264443	0.791438	0.999995
ENSMUSG00000015134	Aldh1a3	protein_coding	7	aldehyde dehydrogenase family 1, subfamily A3	ALDH1A3	13.6164	0.00151541	0.000175435	0.0415243	0.0031516	0.997485	0.999995
ENSMUSG00000015143	Actn1	protein_coding	12	actinin, alpha 1	ACTN1	317.573	-0.18423	-0.116954	0.0711884	-1.64135	0.100724	0.999995
ENSMUSG00000015149	Sirt2	protein_coding	7	sirtuin 2	SIRT2	2567.46	-0.0126812	-0.0109783	0.0509428	-0.214646	0.830043	0.999995
ENSMUSG00000015165	Hnrnpl	protein_coding	7	heterogeneous nuclear ribonucleoprotein L	HNRNPL	2789.35	-0.0691004	-0.0612562	0.0469264	-1.30509	0.191863	0.999995
ENSMUSG00000015176	Nolc1	protein_coding	19	nucleolar and coiled-body phosphoprotein 1	NOLC1	874.733	0.0428431	0.0330474	0.0620868	0.532236	0.594563	0.999995
ENSMUSG00000015189	Casd1	protein_coding	6	CAS1 domain containing 1	CASD1	1196.07	0.00561871	0.00467813	0.0569495	0.0807732	0.935622	0.999995
ENSMUSG00000015202	Cnksr3	protein_coding	10	Cnksr family member 3	CNKSR3	119.469	-0.0456558	-0.0201871	0.0734472	-0.275941	0.782593	0.999995
ENSMUSG00000015214	Mtmr1	protein_coding	X	myotubularin related protein 1	MTMR1	638.941	0.0623742	0.0446196	0.0665601	0.672297	0.501395	0.999995
ENSMUSG00000015217	Hmgb3	protein_coding	X	high mobility group box 3	HMGB3	254.574	0.0653962	0.0366811	0.0733754	0.499278	0.617584	0.999995
ENSMUSG00000015222	Map2	protein_coding	1	microtubule-associated protein 2	MAP2	27924.5	0.038635	0.0356835	0.0392646	0.908806	0.363453	0.999995
ENSMUSG00000015224	Cyp2j9	protein_coding	4	cytochrome P450, family 2, subfamily j, polypeptide 9		764.729	0.180742	0.130516	0.0655011	2.01875	0.0435127	0.999995
ENSMUSG00000015247	Nipsnap3b	protein_coding	4	nipsnap homolog 3B	NIPSNAP3A,NIPSNAP3B	245.455	-0.0858949	-0.0510043	0.0726042	-0.702211	0.482548	0.999995
ENSMUSG00000015289	Lage3	protein_coding	X	L antigen family, member 3	LAGE3	176.643	0.14472	0.07827	0.0736717	1.06135	0.288529	0.999995
ENSMUSG00000015290	Ubl4a	protein_coding	X	ubiquitin-like 4A	UBL4A	742.819	0.0800862	0.0632343	0.0602628	1.04921	0.29408	0.999995
ENSMUSG00000015291	Gdi1	protein_coding	X	guanosine diphosphate (GDP) dissociation inhibitor 1	GDI1	6614.98	0.0271194	0.0240036	0.0466769	0.515747	0.606031	0.999995
ENSMUSG00000015305	Sash1	protein_coding	10	SAM and SH3 domain containing 1	SASH1	2318.15	-0.0758018	-0.0646214	0.0521148	-1.24295	0.213888	0.999995
ENSMUSG00000015312	Gadd45b	protein_coding	10	growth arrest and DNA-damage-inducible 45 beta	GADD45B	172.106	0.0735543	0.0347977	0.0738638	0.479692	0.631446	0.999995
ENSMUSG00000015314	Slamf6	protein_coding	1	SLAM family member 6	SLAMF6	4.46908	-1.2519	-0.0216126	0.0234922	-1.30383	0.192291	0.999995
ENSMUSG00000015316	Slamf1	protein_coding	1	signaling lymphocytic activation molecule family member 1	SLAMF1	1.53117	-0.122153	-0.000765836	0.0148064	-0.0834698	0.933478	0.999995
ENSMUSG00000015335	Zdhhc12	protein_coding	2	zinc finger, DHHC domain containing 12	ZDHHC12	62.8354	-0.0833826	-0.0216206	0.0651971	-0.338109	0.735281	0.999995
ENSMUSG00000015337	Endog	protein_coding	2	endonuclease G	ENDOG	283.336	0.0847071	0.0510569	0.0721582	0.714017	0.475217	0.999995
ENSMUSG00000015340	Cybb	protein_coding	X	cytochrome b-245, beta polypeptide	CYBB	20.1203	-0.185795	-0.0239047	0.0493197	-0.47915	0.631832	0.999995
ENSMUSG00000015341	Golga7	protein_coding	8	golgi autoantigen, golgin subfamily a, 7	GOLGA7	2293.17	0.102073	0.0889055	0.0495939	1.79213	0.0731121	0.999995
ENSMUSG00000015342	Xk	protein_coding	X	X-linked Kx blood group	XK	501.039	0.0575317	0.0398988	0.0675967	0.597637	0.550082	0.999995
ENSMUSG00000015354	Pcolce2	protein_coding	9	procollagen C-endopeptidase enhancer 2	PCOLCE2	261.631	-0.159196	-0.0971632	0.0720723	-1.3488	0.177401	0.999995
ENSMUSG00000015355	Cd48	protein_coding	1	CD48 antigen	CD48	13.4395	0.0189484	0.00442301	0.0422069	0.0401127	0.968003	0.999995
ENSMUSG00000015357	Clpx	protein_coding	9	caseinolytic mitochondrial matrix peptidase chaperone subunit	CLPX	763.248	0.0368753	0.0282267	0.0626981	0.449801	0.652854	0.999995
ENSMUSG00000015363	Trabd	protein_coding	15	TraB domain containing	TRABD	456.237	0.115849	0.0821316	0.0671783	1.22184	0.221768	0.999995
ENSMUSG00000015377	Dennd6b	protein_coding	15	DENN/MADD domain containing 6B	DENND6B	952.713	-0.0988581	-0.0759751	0.0618147	-1.23781	0.215786	0.999995
ENSMUSG00000015396	Cd83	protein_coding	13	CD83 antigen	CD83	1337.8	0.0252074	0.0203256	0.0586145	0.34602	0.729328	0.999995
ENSMUSG00000015405	Ace2	protein_coding	X	angiotensin I converting enzyme (peptidyl-dipeptidase A) 2	ACE2	35.9985	-0.0812611	-0.0172759	0.0600545	-0.282038	0.777914	0.999995
ENSMUSG00000015451	C4a	processed_transcript	17	complement component 4A (Rodgers blood group)	C4A,C4B	82.2756	0.2628	0.0725686	0.0676085	1.15591	0.247717	0.999995
ENSMUSG00000015452	Ager	protein_coding	17	advanced glycosylation end product-specific receptor	AGER	6.2558	-0.820555	-0.0317171	0.0288742	-1.11242	0.265957	0.999995
ENSMUSG00000015461	Atf6b	protein_coding	17	activating transcription factor 6 beta	ATF6B	417.028	0.00520918	0.00356481	0.0687841	0.051725	0.958748	0.999995
ENSMUSG00000015467	Egfl8	protein_coding	17	EGF-like domain 8	EGFL8	13.1486	1.03582	0.0788079	0.0395676	1.99912	0.0455955	0.999995
ENSMUSG00000015468	Notch4	protein_coding	17	notch 4	NOTCH4	109.553	0.14506	0.0582109	0.0725192	0.806808	0.419777	0.999995
ENSMUSG00000015474	Ppt2	protein_coding	17	palmitoyl-protein thioesterase 2	PPT2	131.11	0.0858437	0.0393346	0.0736443	0.533176	0.593912	0.999995
ENSMUSG00000015476	Prrt1	protein_coding	17	proline-rich transmembrane protein 1	PRRT1	168.914	-0.171788	-0.0652535	0.0724431	-0.94938	0.342427	0.999995
ENSMUSG00000015478	Rnf5	protein_coding	17	ring finger protein 5	RNF5	404.622	-0.0629942	-0.0421498	0.0695534	-0.606021	0.544501	0.999995
ENSMUSG00000015484	Fam163a	protein_coding	1	family with sequence similarity 163, member A	FAM163A	140.729	-0.00921893	-0.00262382	0.0697993	-0.0443131	0.964655	0.999995
ENSMUSG00000015488	Cacfd1	protein_coding	2	calcium channel flower domain containing 1	CACFD1	515.349	0.184577	0.135615	0.0653487	2.07196	0.0382694	0.999995
ENSMUSG00000015501	Hivep2	protein_coding	10	human immunodeficiency virus type I enhancer binding protein 2	HIVEP2	1828.25	-0.0902551	-0.0768711	0.0531131	-1.44045	0.149739	0.999995
ENSMUSG00000015522	Arnt	protein_coding	3	aryl hydrocarbon receptor nuclear translocator	ARNT	465.694	-0.105754	-0.070979	0.06946	-1.02134	0.307093	0.999995
ENSMUSG00000015533	Itga2	protein_coding	13	integrin alpha 2	ITGA2	10.0818	-0.424201	-0.01821	0.0349908	-0.715295	0.474427	0.999995
ENSMUSG00000015536	Mocs2	protein_coding	13	molybdenum cofactor synthesis 2	MOCS2	823.072	-0.0205716	-0.0158724	0.0621957	-0.254729	0.798933	0.999995
ENSMUSG00000015542	Nat9	protein_coding	11	N-acetyltransferase 9 (GCN5-related, putative)	NAT9	299.596	0.0918712	0.0572226	0.0716146	0.80013	0.423635	0.999995
ENSMUSG00000015568	Lpl	protein_coding	8	lipoprotein lipase	LPL	210.771	-1.49672	-0.0454058	0.0230761	-1.61722	0.10583	0.999995
ENSMUSG00000015575	Atp6v0e	protein_coding	17	ATPase, H+ transporting, lysosomal V0 subunit E	ATP6V0E1	314.898	0.0419876	0.0251551	0.0720508	0.356364	0.721568	0.999995
ENSMUSG00000015597	Zfp318	protein_coding	17	zinc finger protein 318	ZNF318	1188.34	-0.131706	-0.110681	0.0540874	-2.04713	0.0406456	0.999995
ENSMUSG00000015599	Ttbk1	protein_coding	17	tau tubulin kinase 1	TTBK1	1786.34	-0.132558	-0.110049	0.0555589	-1.97963	0.0477453	0.999995
ENSMUSG00000015605	Srf	protein_coding	17	serum response factor	SRF	348.836	0.0230099	0.0143532	0.0712301	0.204629	0.837862	0.999995
ENSMUSG00000015619	Gata3	protein_coding	2	GATA binding protein 3	GATA3	7.05699	-0.261134	-0.0108336	0.0317884	-0.397732	0.690828	0.999995
ENSMUSG00000015653	Steap2	protein_coding	5	six transmembrane epithelial antigen of prostate 2	STEAP2	1962.13	0.0423224	0.0355851	0.0542918	0.654253	0.512949	0.999995
ENSMUSG00000015656	Hspa8	protein_coding	9	heat shock protein 8	HSPA8	29217.8	-0.018097	-0.0113499	0.0735968	-0.111578	0.911158	0.999995
ENSMUSG00000015659	Serac1	protein_coding	17	serine active site containing 1	SERAC1	321.936	0.142021	0.0903088	0.0710018	1.27789	0.201287	0.999995
ENSMUSG00000015668	Pdzd11	protein_coding	X	PDZ domain containing 11	PDZD11	374.913	-0.0519283	-0.0351044	0.0687625	-0.516001	0.605853	0.999995
ENSMUSG00000015671	Psma2	protein_coding	13	proteasome subunit alpha 2	PSMA2	1882.13	0.0856465	0.0704369	0.0566222	1.24242	0.21408	0.999995
ENSMUSG00000015672	Mrpl32	protein_coding	13	mitochondrial ribosomal protein L32	MRPL32	248.534	0.156812	0.0937326	0.0724566	1.29577	0.195055	0.999995
ENSMUSG00000015697	Setdb1	protein_coding	3	SET domain, bifurcated 1	SETDB1	863.143	-0.0231376	-0.0180175	0.0617357	-0.290427	0.77149	0.999995
ENSMUSG00000015702	Anxa9	protein_coding	3	annexin A9	ANXA9	10.3476	-0.496268	-0.0329476	0.0368349	-0.890482	0.373207	0.999995
ENSMUSG00000015709	Arnt2	protein_coding	7	aryl hydrocarbon receptor nuclear translocator 2	ARNT2	3157.11	-0.0812832	-0.070194	0.0515689	-1.35265	0.176169	0.999995
ENSMUSG00000015711	Prune1	protein_coding	3	prune exopolyphosphatase	PRUNE1	485.773	-0.0766092	-0.054218	0.0671196	-0.809584	0.418179	0.999995
ENSMUSG00000015714	Cers2	protein_coding	3	ceramide synthase 2	CERS2	2144.72	-0.0470305	-0.039859	0.053148	-0.749918	0.453304	0.999995
ENSMUSG00000015733	Capza2	protein_coding	6	capping protein (actin filament) muscle Z-line, alpha 2	CAPZA2	3044.86	0.0299799	0.0258312	0.0511521	0.504579	0.613855	0.999995
ENSMUSG00000015745	Plekho1	protein_coding	3	pleckstrin homology domain containing, family O member 1	PLEKHO1	350.183	-0.128638	-0.0829541	0.0704692	-1.18771	0.234948	0.999995
ENSMUSG00000015747	Vps45	protein_coding	3	vacuolar protein sorting 45	VPS45	541.482	-0.00236577	-0.00202654	0.06619	-0.0258238	0.979398	0.999995
ENSMUSG00000015748	Prpf3	protein_coding	3	pre-mRNA processing factor 3	PRPF3	273.966	-0.13603	-0.0828013	0.0720633	-1.15327	0.2488	0.999995
ENSMUSG00000015749	Anp32e	protein_coding	3	acidic (leucine-rich) nuclear phosphoprotein 32 family, member E	ANP32E	1134.52	-0.026391	-0.0220197	0.0555987	-0.393712	0.693794	0.999995
ENSMUSG00000015750	Aph1a	protein_coding	3	aph1 homolog A, gamma secretase subunit	APH1A	516.452	0.0289086	0.0214242	0.0647129	0.331278	0.740435	0.999995
ENSMUSG00000015755	Tab2	protein_coding	10	TGF-beta activated kinase 1/MAP3K7 binding protein 2	TAB2	960.52	-0.0291022	-0.0242621	0.0558693	-0.430941	0.666511	0.999995
ENSMUSG00000015757	Ppil4	protein_coding	10	peptidylprolyl isomerase (cyclophilin)-like 4	PPIL4	603.457	-0.0268402	-0.0194285	0.0665093	-0.289793	0.771975	0.999995
ENSMUSG00000015759	Cnih1	protein_coding	14	cornichon family AMPA receptor auxiliary protein 1	CNIH1	820.039	0.0463119	0.03707	0.0591163	0.626824	0.530774	0.999995
ENSMUSG00000015766	Eps8	protein_coding	6	epidermal growth factor receptor pathway substrate 8	EPS8	1124.5	0.193175	0.137421	0.0667751	2.06635	0.0387951	0.999995
ENSMUSG00000015776	Med22	protein_coding	2	mediator complex subunit 22	MED22	448.245	0.151915	0.106238	0.0677912	1.56689	0.117139	0.999995
ENSMUSG00000015790	Surf1	protein_coding	2	surfeit gene 1	SURF1	897.095	0.0947678	0.0748898	0.0601848	1.24434	0.213376	0.999995
ENSMUSG00000015804	Med28	protein_coding	5	mediator complex subunit 28	MED28	709.318	0.108567	0.0858123	0.0601236	1.42801	0.153289	0.999995
ENSMUSG00000015806	Qdpr	protein_coding	5	quinoid dihydropteridine reductase	QDPR	4727.34	0.0681052	0.0604402	0.0477607	1.25712	0.20871	0.999995
ENSMUSG00000015812	Gnrh1	protein_coding	14	gonadotropin releasing hormone 1	GNRH1	7.27677	-0.682609	-0.032918	0.0320747	-1.03933	0.298651	0.999995
ENSMUSG00000015829	Tnr	protein_coding	1	tenascin R	TNR	1735.71	0.0382401	0.030746	0.0585884	0.525307	0.59937	0.999995
ENSMUSG00000015837	Sqstm1	protein_coding	11	sequestosome 1	SQSTM1	7841.5	0.00395606	0.00360128	0.0432524	0.0828169	0.933997	0.999995
ENSMUSG00000015839	Nfe2l2	protein_coding	2	nuclear factor, erythroid derived 2, like 2	NFE2L2	453.169	-0.0831707	-0.0580789	0.0677134	-0.860244	0.389654	0.999995
ENSMUSG00000015843	Rxrg	protein_coding	1	retinoid X receptor gamma	RXRG	90.3863	0.0926914	0.0344712	0.0711051	0.473796	0.635645	0.999995
ENSMUSG00000015846	Rxra	protein_coding	2	retinoid X receptor alpha	RXRA	1111.42	0.017945	0.0148423	0.0558263	0.266056	0.790196	0.999995
ENSMUSG00000015850	Adamtsl4	protein_coding	3	ADAMTS-like 4	ADAMTSL4	513.469	-0.227858	-0.129143	0.0732358	-1.76527	0.0775181	0.999995
ENSMUSG00000015852	Fcrls	protein_coding	3	Fc receptor-like S, scavenger receptor		96.6425	0.358623	0.0183384	0.0289755	0.494979	0.620615	0.999995
ENSMUSG00000015869	Prpsap1	protein_coding	11	phosphoribosyl pyrophosphate synthetase-associated protein 1	PRPSAP1	703.388	-0.0104184	-0.00812565	0.0619014	-0.130136	0.896459	0.999995
ENSMUSG00000015879	Fam184b	protein_coding	5	family with sequence similarity 184, member B	FAM184B	123.479	0.00462636	0.00230448	0.0736116	0.0285847	0.977196	0.999995
ENSMUSG00000015880	Ncapg	protein_coding	5	non-SMC condensin I complex, subunit G	NCAPG	8.1232	0.435625	0.0172084	0.0293422	0.608872	0.54261	0.999995
ENSMUSG00000015882	Lcorl	protein_coding	5	ligand dependent nuclear receptor corepressor-like	LCORL	776.682	0.102256	0.0822098	0.0586215	1.40338	0.160504	0.999995
ENSMUSG00000015889	Lta4h	protein_coding	10	leukotriene A4 hydrolase	LTA4H	660.795	0.050282	0.0392038	0.0616838	0.632125	0.527305	0.999995
ENSMUSG00000015932	Dstn	protein_coding	2	destrin	DSTN	2103.63	-0.0928031	-0.0775585	0.055023	-1.40636	0.159618	0.999995
ENSMUSG00000015937	Macroh2a1	protein_coding	13	macroH2A.1 histone	MACROH2A1	943.092	-0.0380958	-0.0309539	0.0573698	-0.541346	0.588269	0.999995
ENSMUSG00000015942	Gtf2ird2	protein_coding	5	GTF2I repeat domain containing 2	GTF2IRD2,GTF2IRD2B	331.334	-0.132229	-0.0881438	0.069659	-1.26609	0.20548	0.999995
ENSMUSG00000015943	Bola1	protein_coding	3	bolA-like 1 (E. coli)	BOLA1	143.036	-0.057692	-0.0257868	0.0736063	-0.356183	0.721704	0.999995
ENSMUSG00000015944	Castor2	protein_coding	5	cytosolic arginine sensor for mTORC1 subunit 2	CASTOR2	1288.39	0.0875699	0.0699267	0.0590197	1.18847	0.234648	0.999995
ENSMUSG00000015947	Fcgr1	protein_coding	3	Fc receptor, IgG, high affinity I	FCGR1A	47.0649	-0.189853	-0.0428115	0.0614778	-0.686051	0.492681	0.999995
ENSMUSG00000015950	Ncf1	protein_coding	5	neutrophil cytosolic factor 1	NCF1	141.37	-0.00623693	-0.00171962	0.0733826	-0.0374121	0.970156	0.999995
ENSMUSG00000015957	Wnt11	protein_coding	7	wingless-type MMTV integration site family, member 11	WNT11	38.5071	-0.273343	-0.0592136	0.0529851	-0.777283	0.436992	0.999995
ENSMUSG00000015961	Adss	protein_coding	1	adenylosuccinate synthetase, non muscle	ADSS2	1898.38	0.00902923	0.00751828	0.0540497	0.140501	0.888264	0.999995
ENSMUSG00000015966	Il17rb	protein_coding	14	interleukin 17 receptor B	IL17RB	78.6257	-0.0818681	-0.0247107	0.068115	-0.367541	0.713215	0.999995
ENSMUSG00000015968	Cacna1d	protein_coding	14	calcium channel, voltage-dependent, L type, alpha 1D subunit	CACNA1D	642.109	-0.00800246	-0.00591253	0.0655318	-0.0892971	0.928846	0.999995
ENSMUSG00000015970	Chdh	protein_coding	14	choline dehydrogenase	CHDH	242.783	-0.0797444	-0.0415746	0.0738229	-0.56668	0.570932	0.999995
ENSMUSG00000015971	Actr8	protein_coding	14	ARP8 actin-related protein 8	ACTR8	1133.74	-0.0228175	-0.0189085	0.0561149	-0.335632	0.737149	0.999995
ENSMUSG00000015980	Lrrc27	protein_coding	7	leucine rich repeat containing 27	LRRC27	189.388	0.0317307	0.0171493	0.0736243	0.234498	0.814599	0.999995
ENSMUSG00000015981	Stk32c	protein_coding	7	serine/threonine kinase 32C	STK32C	373.708	0.057803	0.035416	0.0716642	0.502014	0.615658	0.999995
ENSMUSG00000015994	Fnta	protein_coding	8	farnesyltransferase, CAAX box, alpha	FNTA	1902.63	-0.014555	-0.0124835	0.0516249	-0.24185	0.808896	0.999995
ENSMUSG00000016018	Mtrex	protein_coding	13	Mtr4 exosome RNA helicase	MTREX	1522.37	0.000232144	9.3608e-05	0.0562412	0.00340295	0.997285	0.999995
ENSMUSG00000016024	Lbp	protein_coding	2	lipopolysaccharide binding protein	LBP	29.951	-0.102139	-0.0139348	0.0481856	-0.255403	0.798412	0.999995
ENSMUSG00000016028	Celsr1	protein_coding	15	cadherin, EGF LAG seven-pass G-type receptor 1	CELSR1	42.8887	-0.318377	-0.0730913	0.0617939	-1.1594	0.246293	0.999995
ENSMUSG00000016087	Fli1	protein_coding	9	Friend leukemia integration 1	FLI1	117.351	-0.0409885	-0.0177109	0.0732302	-0.241884	0.80887	0.999995
ENSMUSG00000016128	Stard13	protein_coding	5	StAR-related lipid transfer (START) domain containing 13	STARD13	619.386	-0.0481741	-0.0346084	0.0661122	-0.527224	0.598038	0.999995
ENSMUSG00000016150	Tenm1	protein_coding	X	teneurin transmembrane protein 1	TENM1	1246.38	-0.0425458	-0.0342641	0.0585867	-0.584467	0.558906	0.999995
ENSMUSG00000016179	Camk1g	protein_coding	1	calcium/calmodulin-dependent protein kinase I gamma	CAMK1G	561.093	-0.00158885	-0.00116389	0.0640499	-0.0185917	0.985167	0.999995
ENSMUSG00000016181	Utp25	protein_coding	1	UTP25 small subunit processome component	UTP25	268.314	-0.0168876	-0.0101861	0.0716458	-0.146805	0.883286	0.999995
ENSMUSG00000016194	Hsd11b1	protein_coding	1	hydroxysteroid 11-beta dehydrogenase 1	HSD11B1	334.018	-0.00253578	-0.00201782	0.0610568	-0.00906113	0.99277	0.999995
ENSMUSG00000016200	Syt14	protein_coding	1	synaptotagmin XIV	SYT14	724.159	-0.137772	-0.100119	0.06596	-1.51542	0.129665	0.999995
ENSMUSG00000016206	H2-M3	protein_coding	17	histocompatibility 2, M region locus 3	HLA-G	95.9289	-0.00627673	-0.00173658	0.0717367	-0.0332076	0.973509	0.999995
ENSMUSG00000016239	Lonrf3	protein_coding	X	LON peptidase N-terminal domain and ring finger 3	LONRF3	253.462	-0.00742533	-0.00380505	0.0724204	-0.0615076	0.950955	0.999995
ENSMUSG00000016252	Atp5e	protein_coding	2	ATP synthase, H+ transporting, mitochondrial F1 complex, epsilon subunit	ATP5F1E	923.834	0.0954424	0.0756118	0.0597229	1.2698	0.204154	0.999995
ENSMUSG00000016253	Nelfcd	protein_coding	2	negative elongation factor complex member C/D, Th1l	NELFCD	652.132	-0.0688125	-0.0519874	0.0636237	-0.815956	0.414525	0.999995
ENSMUSG00000016255	Tubb1	protein_coding	2	tubulin, beta 1 class VI	TUBB1	3.26939	-1.31421	-0.0270613	0.0214513	-1.26593	0.205537	0.999995
ENSMUSG00000016256	Ctsz	protein_coding	2	cathepsin Z	CTSZ	784.19	0.0483308	0.0352024	0.0653931	0.541776	0.587973	0.999995
ENSMUSG00000016257	Prelid3b	protein_coding	2	PRELI domain containing 3B	PRELID3B	763.188	0.0481473	0.0379033	0.0601151	0.633449	0.52644	0.999995
ENSMUSG00000016262	Sertad4	protein_coding	1	SERTA domain containing 4	SERTAD4	123.347	-0.186971	-0.0852241	0.0736222	-1.15647	0.247488	0.999995
ENSMUSG00000016308	Ube2a	protein_coding	X	ubiquitin-conjugating enzyme E2A	UBE2A	358.921	0.000536436	0.000441317	0.0687067	0.00534282	0.995737	0.999995
ENSMUSG00000016319	Slc25a5	protein_coding	X	solute carrier family 25 (mitochondrial carrier, adenine nucleotide translocator), member 5	SLC25A5	4258.96	0.0297791	0.0261021	0.0485905	0.537337	0.591035	0.999995
ENSMUSG00000016344	Ppdpf	protein_coding	2	pancreatic progenitor cell differentiation and proliferation factor	PPDPF	345.059	-0.168231	-0.0950524	0.0733458	-1.28824	0.197661	0.999995
ENSMUSG00000016346	Kcnq2	protein_coding	2	potassium voltage-gated channel, subfamily Q, member 2	KCNQ2	3618.68	-0.018844	-0.0155916	0.0561296	-0.277076	0.781722	0.999995
ENSMUSG00000016349	Eef1a2	protein_coding	2	eukaryotic translation elongation factor 1 alpha 2	EEF1A2	9021.86	-0.0355282	-0.0311581	0.0488142	-0.637171	0.524013	0.999995
ENSMUSG00000016356	Col20a1	protein_coding	2	collagen, type XX, alpha 1	COL20A1	38.1823	-0.0765699	-0.0121655	0.0561835	-0.238426	0.811551	0.999995
ENSMUSG00000016382	Pls3	protein_coding	X	plastin 3 (T-isoform)	PLS3	2854.21	0.0477707	0.0400005	0.0544728	0.734859	0.462425	0.999995
ENSMUSG00000016386	Mpped2	protein_coding	2	metallophosphoesterase domain containing 2	MPPED2	200.914	0.143717	0.0769516	0.0737207	1.0449	0.29607	0.999995
ENSMUSG00000016409	Nkap	protein_coding	X	NFKB activating protein	NKAP	373.054	0.04709	0.0323081	0.0687421	0.468361	0.639526	0.999995
ENSMUSG00000016427	Ndufa1	protein_coding	X	NADH:ubiquinone oxidoreductase subunit A1	NDUFA1	619.11	0.0513263	0.0384362	0.0643172	0.595616	0.551432	0.999995
ENSMUSG00000016458	Wt1	protein_coding	2	Wilms tumor 1 homolog	WT1	4.85846	1.45598	0.0421864	0.025493	1.68973	0.0910791	0.999995
ENSMUSG00000016477	E2f3	protein_coding	13	E2F transcription factor 3	E2F3	326.004	-0.0525313	-0.0349101	0.0697425	-0.501271	0.61618	0.999995
ENSMUSG00000016481	Cr1l	protein_coding	1	complement component (3b/4b) receptor 1-like	CR1L	564.127	0.00759112	0.00567478	0.0639012	0.0892464	0.928886	0.999995
ENSMUSG00000016487	Ppfibp1	protein_coding	6	PTPRF interacting protein, binding protein 1 (liprin beta 1)	PPFIBP1	603.345	0.00437473	0.00303433	0.0644244	0.0505936	0.959649	0.999995
ENSMUSG00000016493	Cd46	protein_coding	1	CD46 antigen, complement regulatory protein	CD46	124.601	-0.163235	-0.0649529	0.0724095	-0.900503	0.367853	0.999995
ENSMUSG00000016494	Cd34	protein_coding	1	CD34 antigen	CD34	492.817	-0.0532206	-0.0360309	0.0688811	-0.526395	0.598614	0.999995
ENSMUSG00000016495	Plgrkt	protein_coding	19	plasminogen receptor, C-terminal lysine transmembrane protein	PLGRKT	252.589	-0.00767552	-0.00454916	0.0736935	-0.0560863	0.955273	0.999995
ENSMUSG00000016496	Cd274	protein_coding	19	CD274 antigen	CD274	87.0377	-0.0866762	-0.0327284	0.0716389	-0.455873	0.648481	0.999995
ENSMUSG00000016503	Gtf3a	protein_coding	5	general transcription factor III A	GTF3A	254.172	-0.15751	-0.0910699	0.0729061	-1.25742	0.208602	0.999995
ENSMUSG00000016510	Mtif3	protein_coding	5	mitochondrial translational initiation factor 3	MTIF3	289.642	0.21456	0.12673	0.0726406	1.74945	0.0802133	0.999995
ENSMUSG00000016520	Lnx2	protein_coding	5	ligand of numb-protein X 2	LNX2	89.3443	0.273799	0.101097	0.0714194	1.4224	0.15491	0.999995
ENSMUSG00000016526	Dyrk3	protein_coding	1	dual-specificity tyrosine-(Y)-phosphorylation regulated kinase 3	DYRK3	83.9228	0.0309017	0.00692759	0.0665639	0.131212	0.895608	0.999995
ENSMUSG00000016528	Mapkapk2	protein_coding	1	MAP kinase-activated protein kinase 2	MAPKAPK2	664.042	0.0673718	0.0507449	0.0638247	0.79397	0.427213	0.999995
ENSMUSG00000016534	Lamp2	protein_coding	X	lysosomal-associated membrane protein 2	LAMP2	2534.03	0.00952547	0.00810455	0.0515791	0.158477	0.874081	0.999995
ENSMUSG00000016541	Atxn10	protein_coding	15	ataxin 10	ATXN10	3602.25	0.0281536	0.0248996	0.0472092	0.527614	0.597768	0.999995
ENSMUSG00000016552	Foxred2	protein_coding	15	FAD-dependent oxidoreductase domain containing 2	FOXRED2	592.98	0.0865604	0.0643342	0.0643089	1.00474	0.315024	0.999995
ENSMUSG00000016554	Eif3d	protein_coding	15	eukaryotic translation initiation factor 3, subunit D	EIF3D	1366.08	0.011364	0.00936994	0.0563911	0.165899	0.868236	0.999995
ENSMUSG00000016559	H3f3b	protein_coding	11	H3.3 histone B	H3-3B	2402.45	0.0579741	0.0495482	0.0519941	0.953757	0.340207	0.999995
ENSMUSG00000016619	Nup50	protein_coding	15	nucleoporin 50	NUP50	958.977	0.069702	0.0569659	0.0570094	1.00041	0.317114	0.999995
ENSMUSG00000016624	Phf21b	protein_coding	15	PHD finger protein 21B	PHF21B	88.7806	-0.0695717	-0.0253868	0.0711585	-0.356562	0.72142	0.999995
ENSMUSG00000016637	Ift27	protein_coding	15	intraflagellar transport 27	IFT27	196.804	0.00484836	0.00282537	0.0736003	0.035956	0.971317	0.999995
ENSMUSG00000016664	Pacsin2	protein_coding	15	protein kinase C and casein kinase substrate in neurons 2	PACSIN2	1657.53	-0.0377953	-0.0317712	0.0541367	-0.586725	0.557389	0.999995
ENSMUSG00000016756	Cmah	protein_coding	13	cytidine monophospho-N-acetylneuraminic acid hydroxylase	CMAHP	3.41953	0.186103	0.011573	0.022275	0.188419	0.850548	0.999995
ENSMUSG00000016757	Ttll12	protein_coding	15	tubulin tyrosine ligase-like family, member 12	TTLL12	420.907	-0.00963998	-0.00611232	0.0711327	-0.086169	0.931332	0.999995
ENSMUSG00000016758	Bik	protein_coding	15	BCL2-interacting killer	BIK	3.49562	0.460932	0.0129223	0.0233528	0.499162	0.617665	0.999995
ENSMUSG00000016763	Scube1	protein_coding	15	signal peptide, CUB domain, EGF-like 1	SCUBE1	143.971	-0.221447	-0.105695	0.0738167	-1.42229	0.154943	0.999995
ENSMUSG00000016831	Tox4	protein_coding	14	TOX high mobility group box family member 4	TOX4	1367.74	0.0341847	0.0289852	0.053062	0.546365	0.584815	0.999995
ENSMUSG00000016833	Mrps18c	protein_coding	5	mitochondrial ribosomal protein S18C	MRPS18C	221.581	-0.0421736	-0.0259975	0.0725881	-0.345158	0.729976	0.999995
ENSMUSG00000016918	Sulf1	protein_coding	1	sulfatase 1	SULF1	415.658	0.00911906	0.00668491	0.069331	0.0885546	0.929436	0.999995
ENSMUSG00000016921	Srsf6	protein_coding	2	serine and arginine-rich splicing factor 6	SRSF6	1611.66	0.0596324	0.0485271	0.0579835	0.833116	0.40478	0.999995
ENSMUSG00000016933	Plcg1	protein_coding	2	phospholipase C, gamma 1	PLCG1	1464.57	-0.0721744	-0.0595314	0.0563227	-1.0556	0.291152	0.999995
ENSMUSG00000016940	Kctd2	protein_coding	11	potassium channel tetramerisation domain containing 2	KCTD2	618.039	0.0377114	0.0247999	0.0714148	0.332079	0.73983	0.999995
ENSMUSG00000016942	Tmprss6	protein_coding	15	transmembrane serine protease 6	TMPRSS6	2.7522	-0.364165	8.41927e-05	0.0195148	-0.317866	0.750587	0.999995
ENSMUSG00000016946	Kctd5	protein_coding	17	potassium channel tetramerisation domain containing 5	KCTD5	472.441	0.23786	0.160641	0.0690322	2.33803	0.0193855	0.999995
ENSMUSG00000016984	Etaa1	protein_coding	11	Ewing tumor-associated antigen 1	ETAA1	186.478	-0.0251871	-0.0153345	0.0738385	-0.178152	0.858604	0.999995
ENSMUSG00000016995	Matn4	protein_coding	2	matrilin 4	MATN4	122.678	0.0376367	0.0143119	0.0727023	0.21217	0.831975	0.999995
ENSMUSG00000017002	Slpi	protein_coding	2	secretory leukocyte peptidase inhibitor	SLPI	26.4848	0.371507	0.0420657	0.0465459	0.889756	0.373597	0.999995
ENSMUSG00000017007	Rbpjl	protein_coding	2	recombination signal binding protein for immunoglobulin kappa J region-like	RBPJL	21.9387	0.900369	0.0985321	0.0465684	2.13789	0.0325254	0.999995
ENSMUSG00000017057	Il13ra1	protein_coding	X	interleukin 13 receptor, alpha 1	IL13RA1	151.029	-0.0895809	-0.0397692	0.0725714	-0.499936	0.61712	0.999995
ENSMUSG00000017119	Nbr1	protein_coding	11	NBR1, autophagy cargo receptor	NBR1	4164.93	-0.0312468	-0.0282162	0.0438208	-0.64364	0.519809	0.999995
ENSMUSG00000017132	Cyth1	protein_coding	11	cytohesin 1	CYTH1	1704.24	0.0427297	0.036547	0.0523564	0.696103	0.486364	0.999995
ENSMUSG00000017144	Rnd3	protein_coding	2	Rho family GTPase 3	RND3	457.318	0.101314	0.069892	0.0683332	1.02386	0.3059	0.999995
ENSMUSG00000017146	Brca1	protein_coding	11	breast cancer 1, early onset	BRCA1	133.563	0.229181	0.105714	0.073716	1.44073	0.149661	0.999995
ENSMUSG00000017167	Cntnap1	protein_coding	11	contactin associated protein-like 1	CNTNAP1	2324.91	-0.131446	-0.0651027	0.0739133	-0.891314	0.372761	0.999995
ENSMUSG00000017176	Nt5c3b	protein_coding	11	5'-nucleotidase, cytosolic IIIB	NT5C3B	470.788	0.120701	0.0879825	0.0656996	1.33941	0.180437	0.999995
ENSMUSG00000017188	Coa3	protein_coding	11	cytochrome C oxidase assembly factor 3	COA3	654.989	0.0343179	0.0240071	0.0640991	0.400932	0.68847	0.999995
ENSMUSG00000017204	Gsdma	protein_coding	11	gasdermin A	GSDMA	4.10963	-0.538497	-0.0150333	0.0242165	-0.607995	0.543191	0.999995
ENSMUSG00000017210	Med24	protein_coding	11	mediator complex subunit 24	MED24	1220.21	-0.0653037	-0.0544744	0.0549685	-0.991087	0.321643	0.999995
ENSMUSG00000017221	Psmd3	protein_coding	11	proteasome (prosome, macropain) 26S subunit, non-ATPase, 3	PSMD3	1507.49	-0.060285	-0.0509478	0.0535573	-0.950657	0.341779	0.999995
ENSMUSG00000017264	Exosc10	protein_coding	4	exosome component 10	EXOSC10	682.853	0.0275468	0.0215852	0.0610021	0.353278	0.72388	0.999995
ENSMUSG00000017286	Glod4	protein_coding	11	glyoxalase domain containing 4	GLOD4	972.795	0.0968624	0.0768034	0.0599938	1.27879	0.200969	0.999995
ENSMUSG00000017288	Vps53	protein_coding	11	VPS53 GARP complex subunit	VPS53	1045.29	0.0500871	0.040082	0.0590215	0.679735	0.496672	0.999995
ENSMUSG00000017291	Taok1	protein_coding	11	TAO kinase 1	TAOK1	5943.58	-0.00376002	-0.0034247	0.0430519	-0.0791645	0.936902	0.999995
ENSMUSG00000017299	Dnttip1	protein_coding	2	deoxynucleotidyltransferase, terminal, interacting protein 1	DNTTIP1	243.851	0.0698928	0.0429059	0.0719423	0.597124	0.550424	0.999995
ENSMUSG00000017307	Acot8	protein_coding	2	acyl-CoA thioesterase 8	ACOT8	141.895	0.0952189	0.0442163	0.0737256	0.599853	0.548604	0.999995
ENSMUSG00000017309	Cd300lg	protein_coding	11	CD300 molecule like family member G	CD300LG	4.44182	-1.57613	-0.0341201	0.0233379	-1.47289	0.140779	0.999995
ENSMUSG00000017314	Mpp2	protein_coding	11	membrane protein, palmitoylated 2 (MAGUK p55 subfamily member 2)	MPP2	790.961	0.0293909	0.02244	0.0626966	0.358524	0.719951	0.999995
ENSMUSG00000017344	Vtn	protein_coding	11	vitronectin	VTN	725.329	-0.100813	-0.0621234	0.0723789	-0.837535	0.402292	0.999995
ENSMUSG00000017376	Nlk	protein_coding	11	nemo like kinase	NLK	758.647	-0.112261	-0.0894266	0.0594678	-1.50425	0.132516	0.999995
ENSMUSG00000017386	Traf4	protein_coding	11	TNF receptor associated factor 4	TRAF4	158.005	0.143437	0.0724605	0.0739101	0.978057	0.328046	0.999995
ENSMUSG00000017390	Aldoc	protein_coding	11	aldolase C, fructose-bisphosphate	ALDOC	27272.2	0.0159412	0.0140727	0.0450855	0.316879	0.751335	0.999995
ENSMUSG00000017400	Stac2	protein_coding	11	SH3 and cysteine rich domain 2	STAC2	407.328	-0.0780028	-0.0455609	0.0728521	-0.625685	0.531522	0.999995
ENSMUSG00000017404	Rpl19	protein_coding	11	ribosomal protein L19	RPL19	3864.32	0.0917681	0.0790528	0.0510834	1.54739	0.121768	0.999995
ENSMUSG00000017405	Nek8	protein_coding	11	NIMA (never in mitosis gene a)-related expressed kinase 8	NEK8	71.7274	0.0122771	0.00349241	0.0672287	0.0533634	0.957442	0.999995
ENSMUSG00000017412	Cacnb4	protein_coding	2	calcium channel, voltage-dependent, beta 4 subunit	CACNB4	3434.05	0.0446651	0.0391369	0.0483913	0.810341	0.417744	0.999995
ENSMUSG00000017417	Plxdc1	protein_coding	11	plexin domain containing 1	PLXDC1	234.572	-0.127985	-0.066413	0.0738677	-0.896417	0.37003	0.999995
ENSMUSG00000017418	Arl5b	protein_coding	2	ADP-ribosylation factor-like 5B	ARL5B	661.528	-0.0393504	-0.0280428	0.066047	-0.431609	0.666026	0.999995
ENSMUSG00000017421	Zfp207	protein_coding	11	zinc finger protein 207	ZNF207	2012.14	0.0144737	0.0126327	0.0494747	0.254945	0.798766	0.999995
ENSMUSG00000017428	Psmd11	protein_coding	11	proteasome (prosome, macropain) 26S subunit, non-ATPase, 11	PSMD11	596.062	-0.0966593	-0.0724536	0.0639746	-1.13368	0.256929	0.999995
ENSMUSG00000017446	C1qtnf1	protein_coding	11	C1q and tumor necrosis factor related protein 1	C1QTNF1	29.0678	-0.0976981	-0.0130781	0.0474783	-0.239606	0.810636	0.999995
ENSMUSG00000017453	Pipox	protein_coding	11	pipecolic acid oxidase	PIPOX	95.6781	-0.0200174	-0.00748531	0.0719543	-0.107244	0.914595	0.999995
ENSMUSG00000017466	Timp2	protein_coding	11	tissue inhibitor of metalloproteinase 2	TIMP2	3637.65	0.00264992	0.00215022	0.0495522	0.0465785	0.962849	0.999995
ENSMUSG00000017478	Zc3h18	protein_coding	8	zinc finger CCCH-type containing 18	ZC3H18	709.709	-0.105181	-0.0830507	0.060269	-1.37758	0.168334	0.999995
ENSMUSG00000017485	Top2b	protein_coding	14	topoisomerase (DNA) II beta	TOP2B	2423.59	-0.0255904	-0.0213161	0.0549401	-0.388686	0.697508	0.999995
ENSMUSG00000017491	Rarb	protein_coding	14	retinoic acid receptor, beta	RARB	211.51	0.000399278	0.000505393	0.0737607	0.00287998	0.997702	0.999995
ENSMUSG00000017493	Igfbp4	protein_coding	11	insulin-like growth factor binding protein 4	IGFBP4	340.165	-0.114922	-0.0698568	0.0712837	-1.0186	0.308395	0.999995
ENSMUSG00000017499	Cdc6	protein_coding	11	cell division cycle 6	CDC6	7.64628	0.361812	0.0188091	0.0314814	0.544098	0.586374	0.999995
ENSMUSG00000017548	Suz12	protein_coding	11	SUZ12 polycomb repressive complex 2 subunit	SUZ12	664.146	0.0911769	0.0702078	0.0620365	1.13437	0.25664	0.999995
ENSMUSG00000017550	Atad5	protein_coding	11	ATPase family, AAA domain containing 5	ATAD5	155.241	-0.166936	-0.0814994	0.0738596	-1.08654	0.277242	0.999995
ENSMUSG00000017561	Crlf3	protein_coding	11	cytokine receptor-like factor 3	CRLF3	369.55	-0.067908	-0.0456128	0.069184	-0.663421	0.507061	0.999995
ENSMUSG00000017607	Tns4	protein_coding	11	tensin 4	TNS4	3.8567	0.392683	0.0109251	0.0242988	0.4482	0.654009	0.999995
ENSMUSG00000017615	Tnfaip1	protein_coding	11	tumor necrosis factor, alpha-induced protein 1 (endothelial)	TNFAIP1	603.292	0.0816391	0.0617722	0.0634775	0.972486	0.330809	0.999995
ENSMUSG00000017631	Abr	protein_coding	11	active BCR-related gene	ABR	5226.05	-0.00788244	-0.00714742	0.0427818	-0.167247	0.867176	0.999995
ENSMUSG00000017639	Rab11fip4	protein_coding	11	RAB11 family interacting protein 4 (class II)	RAB11FIP4	5774.72	0.0292203	0.026476	0.0431944	0.612716	0.540064	0.999995
ENSMUSG00000017652	Cd40	protein_coding	2	CD40 antigen	CD40	12.4124	0.17005	0.010066	0.0388168	0.325842	0.744544	0.999995
ENSMUSG00000017664	Slc35c2	protein_coding	2	solute carrier family 35, member C2	SLC35C2	620.512	0.110296	0.083606	0.0632599	1.32263	0.185959	0.999995
ENSMUSG00000017667	Zfp334	protein_coding	2	zinc finger protein 334	ZNF334	789.069	0.0932075	0.0719854	0.0620615	1.15877	0.246549	0.999995
ENSMUSG00000017670	Elmo2	protein_coding	2	engulfment and cell motility 2	ELMO2	1881.17	0.0501072	0.0429858	0.0513413	0.839023	0.401456	0.999995
ENSMUSG00000017677	Wsb1	protein_coding	11	WD repeat and SOCS box-containing 1	WSB1	1855.04	0.0192915	0.0163581	0.0534694	0.304947	0.760407	0.999995
ENSMUSG00000017679	Ttpal	protein_coding	2	tocopherol (alpha) transfer protein-like	TTPAL	736.086	0.0384713	0.0305786	0.0599232	0.508928	0.610803	0.999995
ENSMUSG00000017686	Rhot1	protein_coding	11	ras homolog family member T1	RHOT1	1580.88	0.00669084	0.00546213	0.0557725	0.0993455	0.920864	0.999995
ENSMUSG00000017692	Rhbdl3	protein_coding	11	rhomboid like 3	RHBDL3	831.625	-0.00161095	-0.0013033	0.0602112	-0.0211361	0.983137	0.999995
ENSMUSG00000017697	Ada	protein_coding	2	adenosine deaminase	ADA	22.9984	0.55022	0.0645868	0.0472453	1.33962	0.180368	0.999995
ENSMUSG00000017707	Serinc3	protein_coding	2	serine incorporator 3	SERINC3	4431.44	0.0017489	0.00122196	0.0495266	0.0307622	0.975459	0.999995
ENSMUSG00000017713	Tha1	protein_coding	11	threonine aldolase 1	THA1P	86.0006	-0.171307	-0.0625597	0.071177	-0.878305	0.379778	0.999995
ENSMUSG00000017715	Pgs1	protein_coding	11	phosphatidylglycerophosphate synthase 1	PGS1	1492.35	0.0279753	0.0232987	0.0565086	0.407085	0.683945	0.999995
ENSMUSG00000017716	Birc5	protein_coding	11	baculoviral IAP repeat-containing 5	BIRC5	17.5985	-0.240231	-0.0242028	0.0446898	-0.546024	0.58505	0.999995
ENSMUSG00000017718	Afmid	protein_coding	11	arylformamidase	AFMID	33.2384	0.153743	0.0222513	0.0551979	0.466234	0.641048	0.999995
ENSMUSG00000017721	Pigt	protein_coding	2	phosphatidylinositol glycan anchor biosynthesis, class T	PIGT	724.955	0.165852	0.126575	0.0627625	2.01895	0.0434928	0.999995
ENSMUSG00000017724	Etv4	protein_coding	11	ets variant 4	ETV4	219.684	0.0403313	0.0195336	0.0738919	0.279411	0.779929	0.999995
ENSMUSG00000017734	Dbndd2	protein_coding	2	dysbindin (dystrobrevin binding protein 1) domain containing 2	DBNDD2	1903.52	-0.538309	-0.0985627	0.0567675	-1.70471	0.0882483	0.999995
ENSMUSG00000017737	Mmp9	protein_coding	2	matrix metallopeptidase 9	MMP9	142.446	0.0231015	0.00875477	0.0717665	0.122435	0.902554	0.999995
ENSMUSG00000017740	Slc12a5	protein_coding	2	solute carrier family 12, member 5	SLC12A5	7351.4	-0.0307875	-0.0263559	0.0539606	-0.480231	0.631063	0.999995
ENSMUSG00000017747	Ghdc	protein_coding	11	GH3 domain containing	GHDC	191.342	0.111678	0.0585387	0.0738033	0.797718	0.425034	0.999995
ENSMUSG00000017754	Pltp	protein_coding	2	phospholipid transfer protein	PLTP	844.972	-0.000200292	-0.000165249	0.0623781	-0.00246668	0.998032	0.999995
ENSMUSG00000017756	Slc12a7	protein_coding	13	solute carrier family 12, member 7	SLC12A7	88.2165	-0.345405	-0.102726	0.0681277	-1.54822	0.12157	0.999995
ENSMUSG00000017760	Ctsa	protein_coding	2	cathepsin A	CTSA	1779.28	0.0206228	0.0177433	0.0514158	0.344624	0.730377	0.999995
ENSMUSG00000017764	Zswim1	protein_coding	2	zinc finger SWIM-type containing 1	ZSWIM1	260.244	-0.0219257	-0.0136458	0.0721625	-0.184768	0.853411	0.999995
ENSMUSG00000017765	Slc12a4	protein_coding	8	solute carrier family 12, member 4	SLC12A4	550.854	-0.0639703	-0.0454124	0.0673869	-0.6696	0.503113	0.999995
ENSMUSG00000017767	Spata25	protein_coding	2	spermatogenesis associated 25	SPATA25	2.30584	-1.54707	-0.0145495	0.017693	-1.17119	0.241522	0.999995
ENSMUSG00000017774	Myo1c	protein_coding	11	myosin IC	MYO1C	380.15	-0.216054	-0.142303	0.0701195	-2.02689	0.0426737	0.999995
ENSMUSG00000017776	Crk	protein_coding	11	v-crk avian sarcoma virus CT10 oncogene homolog	CRK	2655.28	0.0137287	0.0119085	0.0508643	0.232871	0.815862	0.999995
ENSMUSG00000017778	Cox7c	protein_coding	13	cytochrome c oxidase subunit 7C	COX7C	1982.71	0.0510906	0.0409068	0.0584765	0.704024	0.481418	0.999995
ENSMUSG00000017781	Pitpna	protein_coding	11	phosphatidylinositol transfer protein, alpha	PITPNA	5153.72	-0.0361989	-0.0316656	0.049694	-0.633829	0.526192	0.999995
ENSMUSG00000017801	Mlx	protein_coding	11	MAX-like protein X	MLX	347.784	0.0309865	0.0200631	0.0704552	0.286372	0.774593	0.999995
ENSMUSG00000017802	Retreg3	protein_coding	11	reticulophagy regulator family member 3	RETREG3	1139.24	0.0563344	0.0456736	0.057673	0.793852	0.427282	0.999995
ENSMUSG00000017817	Jph2	protein_coding	2	junctophilin 2	JPH2	13.8624	-0.0568223	-7.42976e-05	0.0413913	-0.117311	0.906613	0.999995
ENSMUSG00000017830	Dhx58	protein_coding	11	DEXH (Asp-Glu-X-His) box polypeptide 58	DHX58	31.8741	-0.164578	-0.0266865	0.0549136	-0.49483	0.62072	0.999995
ENSMUSG00000017831	Rab5a	protein_coding	17	RAB5A, member RAS oncogene family	RAB5A	1864.53	0.071081	0.0608586	0.0518077	1.1753	0.239877	0.999995
ENSMUSG00000017837	Nkiras2	protein_coding	11	NFKB inhibitor interacting Ras-like protein 2	NKIRAS2	205.737	0.120327	0.0664687	0.0735317	0.901125	0.367522	0.999995
ENSMUSG00000017843	Ppp2r5c	protein_coding	12	protein phosphatase 2, regulatory subunit B', gamma	PPP2R5C	3578.23	0.0349533	0.0312397	0.0455404	0.686031	0.492694	0.999995
ENSMUSG00000017858	Ift52	protein_coding	2	intraflagellar transport 52	IFT52	422.641	-0.0320592	-0.0228584	0.066922	-0.341193	0.732958	0.999995
ENSMUSG00000017861	Mybl2	protein_coding	2	myeloblastosis oncogene-like 2	MYBL2	6.89369	-0.059426	-0.00323001	0.0321734	-0.0920395	0.926667	0.999995
ENSMUSG00000017868	Sgk2	protein_coding	2	serum/glucocorticoid regulated kinase 2	SGK2	92.3775	-0.0162836	-0.00604628	0.0713799	-0.0844531	0.932696	0.999995
ENSMUSG00000017897	Eya2	protein_coding	2	EYA transcriptional coactivator and phosphatase 2	EYA2	126.798	-0.0962665	-0.0458058	0.0735967	-0.593302	0.552979	0.999995
ENSMUSG00000017929	B4galt5	protein_coding	2	UDP-Gal:betaGlcNAc beta 1,4-galactosyltransferase, polypeptide 5	B4GALT5	919.418	0.0600341	0.0463508	0.0622311	0.742604	0.457721	0.999995
ENSMUSG00000017943	Gdap1l1	protein_coding	2	ganglioside-induced differentiation-associated protein 1-like 1	GDAP1L1	730.83	0.031093	0.0246118	0.0600913	0.409354	0.68228	0.999995
ENSMUSG00000017969	Ptgis	protein_coding	2	prostaglandin I2 (prostacyclin) synthase	PTGIS	46.6378	0.212634	0.041605	0.0614724	0.767179	0.442975	0.999995
ENSMUSG00000017978	Cadps2	protein_coding	6	Ca2+-dependent activator protein for secretion 2	CADPS2	568.537	0.0363993	0.0259128	0.06696	0.386888	0.698839	0.999995
ENSMUSG00000017999	Ddx27	protein_coding	2	DEAD (Asp-Glu-Ala-Asp) box polypeptide 27	DDX27	468.522	-0.0639778	-0.0453023	0.0672858	-0.672118	0.501509	0.999995
ENSMUSG00000018001	Cyth3	protein_coding	5	cytohesin 3	CYTH3	823.758	0.0742104	0.056498	0.0624002	0.913324	0.361072	0.999995
ENSMUSG00000018008	Cyth4	protein_coding	15	cytohesin 4	CYTH4	189.906	0.026391	0.0150892	0.0735044	0.198345	0.842775	0.999995
ENSMUSG00000018012	Rac3	protein_coding	11	Rac family small GTPase 3	RAC3	194.658	0.00362922	0.00159541	0.073809	0.0258825	0.979351	0.999995
ENSMUSG00000018040	Rrp7a	protein_coding	15	ribosomal RNA processing 7 homolog A (S. cerevisiae)	RRP7A	1481.29	0.109018	0.0925062	0.0529926	1.74567	0.0808677	0.999995
ENSMUSG00000018042	Cyb5r3	protein_coding	15	cytochrome b5 reductase 3	CYB5R3	1361.2	-0.00669919	-0.00513193	0.0626347	-0.0818717	0.934749	0.999995
ENSMUSG00000018068	Ints2	protein_coding	11	integrator complex subunit 2	INTS2	448.988	-0.08821	-0.0630565	0.0664956	-0.952713	0.340735	0.999995
ENSMUSG00000018076	Med13l	protein_coding	5	mediator complex subunit 13-like	MED13L	999.009	-0.210735	-0.153488	0.0659141	-2.32139	0.0202657	0.999995
ENSMUSG00000018102	H2bc4	protein_coding	13	H2B clustered histone 4	H2BC10	437.706	0.137215	0.0944815	0.0685061	1.37743	0.168379	0.999995
ENSMUSG00000018126	Baiap2l2	protein_coding	15	BAI1-associated protein 2-like 2	BAIAP2L2	3.64762	-1.39274	-0.0327239	0.0233431	-1.45655	0.145241	0.999995
ENSMUSG00000018143	Mafk	protein_coding	5	v-maf musculoaponeurotic fibrosarcoma oncogene family, protein K (avian)	MAFK	283.172	-0.0166961	-0.0109447	0.0713085	-0.147862	0.882452	0.999995
ENSMUSG00000018160	Med1	protein_coding	11	mediator complex subunit 1	MED1	1222.86	0.0686913	0.0555537	0.0580101	0.958958	0.33758	0.999995
ENSMUSG00000018166	Erbb3	protein_coding	10	erb-b2 receptor tyrosine kinase 3	ERBB3	950.589	0.02266	0.0176239	0.0605213	0.294672	0.768245	0.999995
ENSMUSG00000018167	Stard3	protein_coding	11	START domain containing 3	STARD3	581.601	0.0883441	0.0673564	0.0628663	1.07214	0.283657	0.999995
ENSMUSG00000018168	Ikzf3	protein_coding	11	IKAROS family zinc finger 3	IKZF3	2.81603	-1.74768	-0.0278478	0.0184387	-1.35936	0.174033	0.999995
ENSMUSG00000018169	Mfng	protein_coding	15	MFNG O-fucosylpeptide 3-beta-N-acetylglucosaminyltransferase	MFNG	61.1784	0.165241	0.0481816	0.0669538	0.711108	0.477017	0.999995
ENSMUSG00000018171	Vmp1	protein_coding	11	vacuole membrane protein 1	VMP1	2079.84	0.0836421	0.0714067	0.0521467	1.37036	0.170576	0.999995
ENSMUSG00000018189	Uchl5	protein_coding	1	ubiquitin carboxyl-terminal esterase L5	UCHL5	771.048	-0.0204844	-0.0162314	0.0650088	-0.232512	0.816141	0.999995
ENSMUSG00000018196	Glrx2	protein_coding	1	glutaredoxin 2 (thioltransferase)	GLRX2	605.898	-0.0692669	-0.0514613	0.0641613	-0.807701	0.419263	0.999995
ENSMUSG00000018199	Ro60	protein_coding	1	Ro60, Y RNA binding protein	RO60	1706.86	0.0698174	0.05902	0.0534072	1.10549	0.268946	0.999995
ENSMUSG00000018209	Stk4	protein_coding	2	serine/threonine kinase 4	STK4	731.846	0.0105992	0.00842699	0.0592273	0.143008	0.886284	0.999995
ENSMUSG00000018217	Pmp22	protein_coding	11	peripheral myelin protein 22	PMP22	1476.53	0.00200145	0.00123973	0.0605398	0.0260132	0.979247	0.999995
ENSMUSG00000018238	Gdf9	protein_coding	11	growth differentiation factor 9	GDF9	19.5741	-0.229433	-0.0250524	0.0486169	-0.580396	0.561647	0.999995
ENSMUSG00000018239	Zcchc10	protein_coding	11	zinc finger, CCHC domain containing 10	ZCCHC10	47.1452	0.160925	0.0368162	0.0626059	0.601859	0.547268	0.999995
ENSMUSG00000018286	Psmb6	protein_coding	11	proteasome (prosome, macropain) subunit, beta type 6	PSMB6	1489.25	-0.00498246	-0.00413648	0.0540094	-0.0776138	0.938135	0.999995
ENSMUSG00000018287	Spag7	protein_coding	11	sperm associated antigen 7	SPAG7	462.833	-0.028482	-0.020633	0.0659986	-0.312907	0.754351	0.999995
ENSMUSG00000018293	Pfn1	protein_coding	11	profilin 1	PFN1	1150.14	0.086865	0.0716453	0.0561668	1.27594	0.201977	0.999995
ENSMUSG00000018322	Tomm34	protein_coding	2	translocase of outer mitochondrial membrane 34	TOMM34	1054.46	-0.13697	-0.108058	0.0601951	-1.79776	0.0722154	0.999995
ENSMUSG00000018326	Ywhab	protein_coding	2	tyrosine 3-monooxygenase/tryptophan 5-monooxygenase activation protein, beta polypeptide	YWHAB	3929.85	0.0854332	0.0769352	0.0442118	1.74046	0.0817777	0.999995
ENSMUSG00000018334	Ksr1	protein_coding	11	kinase suppressor of ras 1	KSR1	643.408	-0.0535952	-0.0398511	0.0645441	-0.617465	0.536928	0.999995
ENSMUSG00000018339	Gpx3	protein_coding	11	glutathione peroxidase 3	GPX3	141.612	-0.0305223	-0.0159873	0.0728226	-0.173562	0.86221	0.999995
ENSMUSG00000018340	Anxa6	protein_coding	11	annexin A6	ANXA6	3998.64	0.00472448	0.00366775	0.0558763	0.0699504	0.944233	0.999995
ENSMUSG00000018341	Il12rb2	protein_coding	6	interleukin 12 receptor, beta 2	IL12RB2	1.08788	-1.62667	-0.0123912	0.01318	-0.936388	0.349074	0.999995
ENSMUSG00000018347	Zkscan6	protein_coding	11	zinc finger with KRAB and SCAN domains 6	ZNF18	204.129	0.0568447	0.0328478	0.0732288	0.440751	0.659393	0.999995
ENSMUSG00000018362	Kpna2	protein_coding	11	karyopherin (importin) alpha 2	KPNA2	322.126	-0.00845157	-0.00528514	0.0715454	-0.073883	0.941103	0.999995
ENSMUSG00000018363	Smurf2	protein_coding	11	SMAD specific E3 ubiquitin protein ligase 2	SMURF2	750.62	0.0332788	0.0257607	0.0617408	0.417669	0.676189	0.999995
ENSMUSG00000018372	Cep95	protein_coding	11	centrosomal protein 95	CEP95	244.558	-0.108033	-0.0652532	0.072336	-0.899891	0.368178	0.999995
ENSMUSG00000018377	Vezf1	protein_coding	11	vascular endothelial zinc finger 1	VEZF1	1099.45	0.00810902	0.00670397	0.0551826	0.122355	0.902618	0.999995
ENSMUSG00000018378	Cuedc1	protein_coding	11	CUE domain containing 1	CUEDC1	701.637	0.0706814	0.0539514	0.063097	0.851808	0.394321	0.999995
ENSMUSG00000018379	Srsf1	protein_coding	11	serine and arginine-rich splicing factor 1	SRSF1	3476.04	0.0354068	0.0293379	0.0559817	0.522724	0.601166	0.999995
ENSMUSG00000018381	Abi3	protein_coding	11	ABI gene family, member 3	ABI3	55.0676	0.242153	0.0611825	0.0645546	0.961304	0.3364	0.999995
ENSMUSG00000018387	Shroom1	protein_coding	11	shroom family member 1	SHROOM1	323.611	-0.171906	-0.0949927	0.0734807	-1.2957	0.195078	0.999995
ENSMUSG00000018395	Kif3a	protein_coding	11	kinesin family member 3A	KIF3A	2429.45	-0.0446153	-0.039184	0.0480459	-0.817111	0.413865	0.999995
ENSMUSG00000018398	Septin8	protein_coding	11	septin 8	SEPTIN8	4939.81	0.0100995	0.00903176	0.045267	0.199742	0.841682	0.999995
ENSMUSG00000018401	Mtmr4	protein_coding	11	myotubularin related protein 4	MTMR4	2529.85	0.0120342	0.00981526	0.0551495	0.181746	0.855782	0.999995
ENSMUSG00000018405	Mrm1	protein_coding	11	mitochondrial rRNA methyltransferase 1	MRM1	252.213	0.133163	0.0746285	0.0733766	1.01645	0.309416	0.999995
ENSMUSG00000018411	Mapt	protein_coding	11	microtubule-associated protein tau	MAPT	6790.4	0.0223205	0.0188634	0.0541079	0.346775	0.728761	0.999995
ENSMUSG00000018412	Kansl1	protein_coding	11	KAT8 regulatory NSL complex subunit 1	KANSL1	1533.86	-0.00187152	-0.00160803	0.0513442	-0.0313353	0.975002	0.999995
ENSMUSG00000018415	Gid4	protein_coding	11	GID complex subunit 4, VID24 homolog	GID4	1322.63	0.0729532	0.0603453	0.0557914	1.08265	0.278962	0.999995
ENSMUSG00000018417	Myo1b	protein_coding	1	myosin IB	MYO1B	335.822	-0.0562068	-0.0371311	0.0698513	-0.533812	0.593472	0.999995
ENSMUSG00000018425	Dhx40	protein_coding	11	DEAH (Asp-Glu-Ala-His) box polypeptide 40	DHX40	478.366	-0.03431	-0.0249697	0.0656373	-0.381508	0.702826	0.999995
ENSMUSG00000018427	Ypel2	protein_coding	11	yippee like 2	YPEL2	976.842	0.0241123	0.0187069	0.0619901	0.300404	0.763869	0.999995
ENSMUSG00000018428	Akap1	protein_coding	11	A kinase (PRKA) anchor protein 1	AKAP1	598.816	-0.0205723	-0.0156425	0.0630996	-0.247897	0.804214	0.999995
ENSMUSG00000018433	Nol11	protein_coding	11	nucleolar protein 11	NOL11	448.521	0.0176303	0.0122287	0.067886	0.181209	0.856203	0.999995
ENSMUSG00000018442	Derl2	protein_coding	11	Der1-like domain family, member 2	DERL2	508.286	0.0714642	0.0530997	0.0653447	0.802351	0.42235	0.999995
ENSMUSG00000018446	C1qbp	protein_coding	11	complement component 1, q subcomponent binding protein	C1QBP	424.503	-0.174824	-0.122264	0.0678856	-1.7963	0.0724471	0.999995
ENSMUSG00000018449	Rpain	protein_coding	11	RPA interacting protein	RPAIN	181.855	0.014017	0.00746834	0.073869	0.0981371	0.921823	0.999995
ENSMUSG00000018451	6330403K07Rik	protein_coding	11	RIKEN cDNA 6330403K07 gene	LOC728392	5529.61	0.143718	0.0359384	0.0630868	0.545535	0.585386	0.999995
ENSMUSG00000018459	Slc13a3	protein_coding	2	solute carrier family 13 (sodium-dependent dicarboxylate transporter), member 3	SLC13A3	408.847	-0.17814	-0.117146	0.0702019	-1.66522	0.0958693	0.999995
ENSMUSG00000018470	Kcnab3	protein_coding	11	potassium voltage-gated channel, shaker-related subfamily, beta member 3	KCNAB3	1257.37	-0.079595	-0.0626757	0.0601967	-1.04472	0.296154	0.999995
ENSMUSG00000018474	Chd3	protein_coding	11	chromodomain helicase DNA binding protein 3	CHD3	5946.69	0.0155431	0.0138404	0.0460539	0.300738	0.763614	0.999995
ENSMUSG00000018476	Kdm6b	protein_coding	11	KDM1 lysine (K)-specific demethylase 6B	KDM6B	109.569	-0.234233	-0.0981372	0.0729203	-1.34224	0.179517	0.999995
ENSMUSG00000018481	Appbp2	protein_coding	11	amyloid beta precursor protein (cytoplasmic tail) binding protein 2	APPBP2	3122.3	0.0387314	0.0345225	0.0460124	0.750266	0.453095	0.999995
ENSMUSG00000018486	Wnt9b	protein_coding	11	wingless-type MMTV integration site family, member 9B	WNT9B	4.21576	-0.810048	-0.0238874	0.0254606	-0.957095	0.338519	0.999995
ENSMUSG00000018500	Adora2b	protein_coding	11	adenosine A2b receptor	ADORA2B	146.557	0.0847899	0.0429526	0.0739064	0.580893	0.561313	0.999995
ENSMUSG00000018501	Ncor1	protein_coding	11	nuclear receptor co-repressor 1	NCOR1	3010.94	-0.0246564	-0.0216483	0.0483624	-0.447681	0.654383	0.999995
ENSMUSG00000018507	Trpv2	protein_coding	11	transient receptor potential cation channel, subfamily V, member 2	TRPV2	331.66	0.0182512	0.0111116	0.0721087	0.154345	0.877338	0.999995
ENSMUSG00000018509	Cenpv	protein_coding	11	centromere protein V	CENPV	158.844	-0.116578	-0.0530015	0.0735589	-0.714739	0.47477	0.999995
ENSMUSG00000018537	Pcgf2	protein_coding	11	polycomb group ring finger 2	PCGF2	62.5609	-0.480027	-0.128005	0.0650379	-1.928	0.0538551	0.999995
ENSMUSG00000018541	Cwc25	protein_coding	11	CWC25 spliceosome-associated protein	CWC25	256.541	0.0663491	0.0401748	0.0723844	0.551026	0.581616	0.999995
ENSMUSG00000018543	1700001P01Rik	protein_coding	11	RIKEN cDNA 1700001P01 gene	C17orf98	4.72267	-0.0911802	-0.00247116	0.0266331	-0.114679	0.9087	0.999995
ENSMUSG00000018548	Trim37	protein_coding	11	tripartite motif-containing 37	TRIM37	9239.93	0.0507386	0.0458404	0.0433972	1.0578	0.290148	0.999995
ENSMUSG00000018554	Ybx2	protein_coding	11	Y box protein 2	YBX2	21.9151	0.22677	0.032668	0.0512171	0.614902	0.538619	0.999995
ENSMUSG00000018559	Ctdnep1	protein_coding	11	CTD nuclear envelope phosphatase 1	CTDNEP1	193.166	-0.0987645	-0.0529704	0.0737227	-0.717637	0.472981	0.999995
ENSMUSG00000018565	Elp5	protein_coding	11	elongator acetyltransferase complex subunit 5	ELP5	674.137	-0.00885866	-0.00663632	0.0626768	-0.108121	0.9139	0.999995
ENSMUSG00000018566	Slc2a4	protein_coding	11	solute carrier family 2 (facilitated glucose transporter), member 4	SLC2A4	60.7544	-0.614027	-0.0261692	0.0307259	-0.902604	0.366736	0.999995
ENSMUSG00000018567	Gabarap	protein_coding	11	gamma-aminobutyric acid receptor associated protein	GABARAP	1884.19	0.0404481	0.0350319	0.0501658	0.69921	0.484421	0.999995
ENSMUSG00000018570	2810408A11Rik	protein_coding	11	RIKEN cDNA 2810408A11 gene		5.30781	-0.0598663	-0.00178804	0.0276459	-0.0785576	0.937385	0.999995
ENSMUSG00000018572	Phf23	protein_coding	11	PHD finger protein 23	PHF23	731.212	-0.000190309	-9.30337e-05	0.0617544	-0.00238744	0.998095	0.999995
ENSMUSG00000018574	Acadvl	protein_coding	11	acyl-Coenzyme A dehydrogenase, very long chain	ACADVL	1232.65	-0.00721165	-0.00604351	0.056895	-0.103832	0.917303	0.999995
ENSMUSG00000018581	Dnah11	protein_coding	12	dynein, axonemal, heavy chain 11	DNAH11	100.797	-0.201079	-0.0535962	0.0635816	-0.774007	0.438927	0.999995
ENSMUSG00000018583	G3bp1	protein_coding	11	GTPase activating protein (SH3 domain) binding protein 1	G3BP1	1458.22	0.0682363	0.0578468	0.0531597	1.08772	0.276718	0.999995
ENSMUSG00000018585	Atox1	protein_coding	11	antioxidant 1 copper chaperone	ATOX1	494.147	0.043023	0.0305299	0.0671637	0.453999	0.64983	0.999995
ENSMUSG00000018589	Glra2	protein_coding	X	glycine receptor, alpha 2 subunit	GLRA2	199	0.325804	0.183583	0.0733611	2.48854	0.012827	0.999995
ENSMUSG00000018593	Sparc	protein_coding	11	secreted acidic cysteine rich glycoprotein	SPARC	15805.1	0.143817	0.123574	0.050901	2.43703	0.0148083	0.999995
ENSMUSG00000018595	Glra4	protein_coding	X	glycine receptor, alpha 4 subunit	GLRA4	17.2088	0.291664	0.0316053	0.0460869	0.689742	0.490357	0.999995
ENSMUSG00000018599	Mief2	protein_coding	11	mitochondrial elongation factor 2	MIEF2	312.489	-0.067279	-0.0406449	0.0723024	-0.561798	0.574254	0.999995
ENSMUSG00000018604	Tbx3	protein_coding	5	T-box 3	TBX3	29.7313	0.19421	0.0305925	0.0535557	0.563424	0.573146	0.999995
ENSMUSG00000018634	Crhr1	protein_coding	11	corticotropin releasing hormone receptor 1	CRHR1	239.405	0.0315156	0.017758	0.073296	0.242703	0.808236	0.999995
ENSMUSG00000018648	Dusp14	protein_coding	11	dual specificity phosphatase 14	DUSP14	84.5282	-0.0269874	-0.00987527	0.0711956	-0.138599	0.889767	0.999995
ENSMUSG00000018651	Tada2a	protein_coding	11	transcriptional adaptor 2A	TADA2A	367.384	-0.00112336	-0.000715783	0.0683565	-0.0113422	0.99095	0.999995
ENSMUSG00000018654	Ikzf1	protein_coding	11	IKAROS family zinc finger 1	IKZF1	66.6538	-0.0982795	-0.0319205	0.0691698	-0.459841	0.64563	0.999995
ENSMUSG00000018659	Pnpo	protein_coding	11	pyridoxine 5'-phosphate oxidase	PNPO	944.501	0.0567219	0.0441038	0.0618105	0.71043	0.477437	0.999995
ENSMUSG00000018661	Cog1	protein_coding	11	component of oligomeric golgi complex 1	COG1	847.37	-0.0847574	-0.0679416	0.0590179	-1.15028	0.25003	0.999995
ENSMUSG00000018666	Cbx1	protein_coding	11	chromobox 1	CBX1	591.312	0.0103617	0.0078022	0.0636983	0.12259	0.902432	0.999995
ENSMUSG00000018669	Cdk5rap3	protein_coding	11	CDK5 regulatory subunit associated protein 3	CDK5RAP3	361.021	-0.00802486	-0.00506686	0.0717735	-0.0692556	0.944786	0.999995
ENSMUSG00000018672	Copz2	protein_coding	11	coatomer protein complex, subunit zeta 2	COPZ2	58.9214	0.0199696	0.0046436	0.0664863	0.0845545	0.932616	0.999995
ENSMUSG00000018677	Slc25a39	protein_coding	11	solute carrier family 25, member 39	SLC25A39	1095.03	-0.0487012	-0.0386607	0.0598038	-0.64644	0.517995	0.999995
ENSMUSG00000018678	Sp2	protein_coding	11	Sp2 transcription factor	SP2	47.6212	-0.166659	-0.0410327	0.0640676	-0.65097	0.515066	0.999995
ENSMUSG00000018697	Aatf	protein_coding	11	apoptosis antagonizing transcription factor	AATF	346.183	0.113405	0.069975	0.0725171	0.933007	0.350816	0.999995
ENSMUSG00000018698	Lhx1	protein_coding	11	LIM homeobox protein 1	LHX1	48.0549	-0.453407	-0.112199	0.0638491	-1.75309	0.079587	0.999995
ENSMUSG00000018707	Dync1h1	protein_coding	12	dynein cytoplasmic 1 heavy chain 1	DYNC1H1	25977.6	-0.0700473	-0.0551533	0.0605295	-0.910694	0.362457	0.999995
ENSMUSG00000018733	Pex12	protein_coding	11	peroxisomal biogenesis factor 12	PEX12	128.132	0.193114	0.0901477	0.0737461	1.22133	0.221961	0.999995
ENSMUSG00000018736	Ndel1	protein_coding	11	nudE neurodevelopment protein 1 like 1	NDEL1	2007.76	0.0538755	0.0467202	0.0500621	0.933956	0.350327	0.999995
ENSMUSG00000018740	Slc25a35	protein_coding	11	solute carrier family 25, member 35	SLC25A35	47.1499	-0.0356684	-0.00843609	0.0638886	-0.138637	0.889737	0.999995
ENSMUSG00000018750	Zbtb4	protein_coding	11	zinc finger and BTB domain containing 4	ZBTB4	3186.73	0.0367607	0.0328571	0.0455573	0.721164	0.470809	0.999995
ENSMUSG00000018752	Tnfsfm13	protein_coding	11	tumor necrosis factor (ligand) superfamily, membrane-bound member 13	TNFSF12-TNFSF13	11.4435	-0.643519	-0.0370593	0.0366267	-1.13173	0.257746	0.999995
ENSMUSG00000018761	Mpdu1	protein_coding	11	mannose-P-dolichol utilization defect 1	MPDU1	483.228	0.0459457	0.0334046	0.0656388	0.510891	0.609427	0.999995
ENSMUSG00000018765	Fxr2	protein_coding	11	fragile X mental retardation, autosomal homolog 2	FXR2	2864.19	0.0257892	0.0228049	0.0475807	0.478387	0.632375	0.999995
ENSMUSG00000018770	Atp5g3	protein_coding	2	ATP synthase, H+ transporting, mitochondrial F0 complex, subunit C3 (subunit 9)	ATP5MC3	2503.89	0.044139	0.0381031	0.0506612	0.752837	0.451548	0.999995
ENSMUSG00000018774	Cd68	protein_coding	11	CD68 antigen	CD68	75.7494	-0.198053	-0.054503	0.0676703	-0.873758	0.38225	0.999995
ENSMUSG00000018796	Acsl1	protein_coding	8	acyl-CoA synthetase long-chain family member 1	ACSL1	1261.65	-0.123353	-0.0967238	0.0613408	-1.56632	0.117274	0.999995
ENSMUSG00000018800	Abca5	protein_coding	11	ATP-binding cassette, sub-family A (ABC1), member 5	ABCA5	2717.47	-0.0026019	-0.00241256	0.0507631	-0.0442554	0.964701	0.999995
ENSMUSG00000018809	Smyd4	protein_coding	11	SET and MYND domain containing 4	SMYD4	340.906	0.0354673	0.0232472	0.06963	0.34009	0.733789	0.999995
ENSMUSG00000018819	Lsp1	protein_coding	7	lymphocyte specific 1	LSP1	72.8012	-0.123318	-0.0401301	0.0694352	-0.582588	0.560171	0.999995
ENSMUSG00000018821	Avpi1	protein_coding	19	arginine vasopressin-induced 1	AVPI1	173.104	0.189614	0.0921388	0.0738684	1.2388	0.215421	0.999995
ENSMUSG00000018822	Sfrp5	protein_coding	19	secreted frizzled-related sequence protein 5	SFRP5	155.842	0.0723581	0.0293964	0.0737467	0.457431	0.647361	0.999995
ENSMUSG00000018830	Myh11	protein_coding	16	myosin, heavy polypeptide 11, smooth muscle	MYH11	157.428	0.0314767	0.0142917	0.073778	0.200425	0.841148	0.999995
ENSMUSG00000018841	Rad51d	protein_coding	11	RAD51 paralog D	RAD51D	403.783	0.0560231	0.0373592	0.0697784	0.533819	0.593467	0.999995
ENSMUSG00000018845	Unc45b	protein_coding	11	unc-45 myosin chaperone B	UNC45B	8.40076	0.695834	0.0333469	0.0321726	1.07133	0.284022	0.999995
ENSMUSG00000018846	Pank3	protein_coding	11	pantothenate kinase 3	PANK3	2142.46	0.00815243	0.00717335	0.0497201	0.142644	0.886571	0.999995
ENSMUSG00000018848	Rars	protein_coding	11	arginyl-tRNA synthetase	RARS1	825.331	0.103806	0.0778886	0.0641478	1.21107	0.22587	0.999995
ENSMUSG00000018849	Wwc1	protein_coding	11	WW, C2 and coiled-coil domain containing 1	WWC1	650.479	-0.0597241	-0.0451906	0.0636352	-0.707941	0.478982	0.999995
ENSMUSG00000018858	Mrpl58	protein_coding	11	mitochondrial ribosomal protein L58	MRPL58	439.002	0.0829666	0.0585721	0.0673834	0.868621	0.385054	0.999995
ENSMUSG00000018861	Fdxr	protein_coding	11	ferredoxin reductase	FDXR	240.987	-0.0641069	-0.0362694	0.073312	-0.492761	0.622182	0.999995
ENSMUSG00000018865	Sult4a1	protein_coding	15	sulfotransferase family 4A, member 1	SULT4A1	7238.08	-0.0332958	-0.0282169	0.0530332	-0.532572	0.59433	0.999995
ENSMUSG00000018882	Mrpl45	protein_coding	11	mitochondrial ribosomal protein L45	MRPL45	681.002	0.0190389	0.0147305	0.0621386	0.236152	0.813315	0.999995
ENSMUSG00000018899	Irf1	protein_coding	11	interferon regulatory factor 1	IRF1	111.755	-0.144089	-0.0495875	0.0703459	-0.709534	0.477993	0.999995
ENSMUSG00000018900	Slc22a5	protein_coding	11	solute carrier family 22 (organic cation transporter), member 5	SLC22A5	343.251	-0.055432	-0.0367085	0.0698348	-0.526835	0.598308	0.999995
ENSMUSG00000018906	P4ha2	protein_coding	11	procollagen-proline, 2-oxoglutarate 4-dioxygenase (proline 4-hydroxylase), alpha II polypeptide	P4HA2	154.133	-0.195169	-0.0857357	0.0733658	-1.16764	0.242951	0.999995
ENSMUSG00000018920	Cxcl16	protein_coding	11	chemokine (C-X-C motif) ligand 16	CXCL16	29.3891	-0.0916217	-0.0136955	0.0532808	-0.263656	0.792045	0.999995
ENSMUSG00000018921	Pelp1	protein_coding	11	proline, glutamic acid and leucine rich protein 1	PELP1	255.413	-0.171825	-0.0989517	0.0729412	-1.36743	0.171491	0.999995
ENSMUSG00000018923	Med11	protein_coding	11	mediator complex subunit 11	MED11	110.833	-0.104187	-0.0437773	0.0729481	-0.598917	0.549228	0.999995
ENSMUSG00000018924	Alox15	protein_coding	11	arachidonate 15-lipoxygenase	ALOX15	0.623459	2.81347	0.00914846	0.0082585	1.08108	0.279663	0.999995
ENSMUSG00000018927	Ccl6	protein_coding	11	chemokine (C-C motif) ligand 6		54.6052	0.177908	0.034608	0.0584795	0.590792	0.554659	0.999995
[truncated: 19,844 more rows]

## Sheet: TG_vs_WT_23856R_57 wks
id	gene_name	biotype	chromosome	description	human_homolog	baseMean	MLE_log2FC	log2FoldChange	lfcSE	stat	pvalue	padj
ENSMUSG00000001415	Smg5	protein_coding	3	Smg-5 homolog, nonsense mediated mRNA decay factor (C. elegans)	SMG5	6367.66	0.554303	0.480079	0.0401273	11.9399	7.33109e-33	1.60045e-28
ENSMUSG00000114133	Gm20075	protein_coding	13	predicted gene, 20075		159.581	3.02175	0.360436	0.0431402	10.0505	9.14193e-24	9.97887e-20
ENSMUSG00000117098	Gm49909	protein_coding	17	predicted gene, 49909		171.784	-1.41212	-0.483017	0.0555387	-8.28882	1.14375e-16	8.32304e-13
ENSMUSG00000116885	4930420G21Rik	lincRNA	16	RIKEN cDNA 4930420G21 gene		74.7614	2.82692	0.187994	0.0343991	6.92009	4.51358e-12	2.4634e-08
ENSMUSG00000037071	Scd1	protein_coding	19	stearoyl-Coenzyme A desaturase 1	SCD	38194.7	-0.298918	-0.253423	0.0427241	-5.89707	3.70006e-09	1.61552e-05
ENSMUSG00000036450	Hif1an	protein_coding	19	hypoxia-inducible factor 1, alpha subunit inhibitor	HIF1AN	3995.56	0.292049	0.239752	0.0453042	5.27104	1.35651e-07	0.000493565
ENSMUSG00000082145	Gm12312	processed_pseudogene	11	predicted gene 12312		27.6503	4.31255	0.0750227	0.0206848	5.20022	1.99049e-07	0.000620776
ENSMUSG00000095009	Gm25175	snoRNA	7	predicted gene, 25175		10.1434	-6.29318	-0.0831826	0.0185241	-5.11745	3.09696e-07	0.000845123
ENSMUSG00000022935	Grik1	protein_coding	16	glutamate receptor, ionotropic, kainate 1	GRIK1	1253.06	0.559561	0.297797	0.0587366	5.0585	4.22559e-07	0.000922488
ENSMUSG00000069020	Urm1	protein_coding	2	ubiquitin related modifier 1	URM1	2556.84	0.297343	0.236055	0.0469583	5.0632	4.12276e-07	0.000922488
ENSMUSG00000073411	H2-D1	protein_coding	17	histocompatibility 2, D region locus 1	HLA-A	5273.92	-0.406569	-0.275	0.0549054	-5.0232	5.08173e-07	0.00100854
ENSMUSG00000035896	Rnase1	protein_coding	14	ribonuclease, RNase A family, 1 (pancreatic)	RNASE1	71.0373	1.42257	0.193794	0.0429032	4.94615	7.56965e-07	0.00137711
ENSMUSG00000040936	Ulk4	protein_coding	9	unc-51-like kinase 4	ULK4	368.466	0.841509	0.261054	0.0551487	4.87484	1.08898e-06	0.00182874
ENSMUSG00000030352	Tspan9	protein_coding	6	tetraspanin 9	TSPAN9	4928.49	0.310332	0.237809	0.049503	4.8194	1.43989e-06	0.0022453
ENSMUSG00000078887	Gm6710	protein_coding	2	predicted gene 6710	ZNF442	54.9175	1.76518	0.148509	0.0359287	4.77547	1.79292e-06	0.00260941
ENSMUSG00000035311	Gnptab	protein_coding	10	N-acetylglucosamine-1-phosphate transferase, alpha and beta subunits	GNPTAB	5472.91	0.249381	0.20702	0.0438306	4.73595	2.18032e-06	0.00297491
ENSMUSG00000001655	Hoxc13	protein_coding	15	homeobox C13	HOXC13	13.0987	5.01303	0.0770844	0.0204322	4.70879	2.49192e-06	0.00320006
ENSMUSG00000034245	Hdac11	protein_coding	6	histone deacetylase 11	HDAC11	15103	0.23529	0.196375	0.0432577	4.5576	5.17422e-06	0.00627546
ENSMUSG00000036019	Tmtc2	protein_coding	10	transmembrane and tetratricopeptide repeat containing 2	TMTC2	2380	0.27588	0.218713	0.0480007	4.52624	6.00432e-06	0.0067791
ENSMUSG00000039191	Rbpj	protein_coding	5	recombination signal binding protein for immunoglobulin kappa J region	RBPJ	1820.63	0.443037	0.259464	0.0578453	4.51909	6.21053e-06	0.0067791
ENSMUSG00000030577	Cd22	protein_coding	7	CD22 antigen	CD22	140.567	-0.899658	-0.238958	0.0518554	-4.50117	6.75811e-06	0.00702554
ENSMUSG00000021423	Ly86	protein_coding	13	lymphocyte antigen 86	LY86	869.512	0.46197	0.256248	0.0583538	4.45314	8.46246e-06	0.00839745
ENSMUSG00000033585	Ndn	protein_coding	7	necdin	NDN	7576.6	0.357541	0.241853	0.0549304	4.41098	1.02904e-05	0.00964984
ENSMUSG00000034557	Zfyve9	protein_coding	4	zinc finger, FYVE domain containing 9	ZFYVE9	14879	-0.210412	-0.180744	0.0410439	-4.39552	1.10506e-05	0.00964984
ENSMUSG00000096648	Gm24027	snoRNA	7	predicted gene, 24027		5.4388	-6.08165	-0.0462066	0.0137637	-4.39633	1.10097e-05	0.00964984
ENSMUSG00000018820	Zfyve27	protein_coding	19	zinc finger, FYVE domain containing 27	ZFYVE27	4174.24	0.214271	0.18293	0.0417422	4.36967	1.24432e-05	0.010448
ENSMUSG00000044522	A730020M07Rik	lincRNA	3	RIKEN cDNA A730020M07 gene		224.272	-0.75766	-0.250422	0.0548254	-4.34183	1.41299e-05	0.0114248
ENSMUSG00000083240	Gm13453	processed_pseudogene	2	predicted gene 13453		59.7762	1.82352	0.120394	0.0318026	4.28098	1.86072e-05	0.0145077
ENSMUSG00000028655	Mfsd2a	protein_coding	4	major facilitator superfamily domain containing 2A	MFSD2A	1505.33	-0.310958	-0.221126	0.0528836	-4.22023	2.44054e-05	0.0183722
ENSMUSG00000038780	Smurf1	protein_coding	5	SMAD specific E3 ubiquitin protein ligase 1	SMURF1	2836.96	0.228316	0.187555	0.0450243	4.16069	3.17294e-05	0.0230895
ENSMUSG00000026674	Ddr2	protein_coding	1	discoidin domain receptor family, member 2	DDR2	399.626	0.470629	0.248977	0.05882	4.12915	3.64108e-05	0.0256414
ENSMUSG00000063801	Ap3s2	protein_coding	7	adaptor-related protein complex 3, sigma 2 subunit	AP3S2	7696.3	0.184433	0.160759	0.0391981	4.10284	4.08117e-05	0.0278425
ENSMUSG00000022193	Psmb5	protein_coding	14	proteasome (prosome, macropain) subunit, beta type 5	PSMB5	2094.66	-0.407421	-0.24039	0.0580393	-4.08253	4.45476e-05	0.0286035
ENSMUSG00000070522	Gm6505	processed_pseudogene	3	predicted pseudogene 6505		32.3057	-2.21122	-0.113005	0.0257857	-4.0851	4.40579e-05	0.0286035
ENSMUSG00000004558	Ndrg2	protein_coding	14	N-myc downstream regulated gene 2	NDRG2	43596.7	-0.214764	-0.178648	0.0438678	-4.07443	4.61264e-05	0.028771
ENSMUSG00000027966	Col11a1	protein_coding	3	collagen, type XI, alpha 1	COL11A1	1172.29	0.462084	0.24971	0.0588465	4.02958	5.58773e-05	0.0329691
ENSMUSG00000115471	C230086J09Rik	TEC	14	RIKEN cDNA C230086J09 gene		569.914	0.512078	0.246137	0.0587515	4.03264	5.51544e-05	0.0329691
ENSMUSG00000032332	Col12a1	protein_coding	9	collagen, type XII, alpha 1	COL12A1	1850.03	0.385204	0.223063	0.0575887	4.01929	5.83739e-05	0.0335358
ENSMUSG00000040652	Oaz2	protein_coding	9	ornithine decarboxylase antizyme 2	OAZ2	4904.18	-0.217292	-0.17934	0.0447558	-3.9985	6.37454e-05	0.0356827
ENSMUSG00000106579	Gm42771	TEC	5	predicted gene 42771		206.42	0.662478	0.234665	0.0558978	3.98857	6.64737e-05	0.0362797
ENSMUSG00000038026	Kcnj9	protein_coding	1	potassium inwardly-rectifying channel, subfamily J, member 9	KCNJ9	1646.17	0.305341	0.215317	0.0538614	3.96413	7.36631e-05	0.038289
ENSMUSG00000116809	A630036G19Rik	TEC	16	RIKEN cDNA A630036G19 gene		306.947	0.594639	0.242069	0.0573973	3.96665	7.28899e-05	0.038289
ENSMUSG00000026656	Fcgr2b	protein_coding	1	Fc receptor, IgG, low affinity IIb	FCGR2B	480.985	0.630794	0.221463	0.0563207	3.91742	8.95008e-05	0.0454393
ENSMUSG00000038422	Hdhd3	protein_coding	4	haloacid dehalogenase-like hydrolase domain containing 3	HDHD3	310.682	0.763355	0.199276	0.0524268	3.89577	9.78869e-05	0.0485675
ENSMUSG00000016194	Hsd11b1	protein_coding	1	hydroxysteroid 11-beta dehydrogenase 1	HSD11B1	831.284	-0.465843	-0.239344	0.0588743	-3.86822	0.000109635	0.0514033
ENSMUSG00000028836	Slc30a2	protein_coding	4	solute carrier family 30 (zinc transporter), member 2	SLC30A2	45.3322	1.49686	0.119819	0.0345107	3.86593	0.000110666	0.0514033
ENSMUSG00000102748	Pcdhgb2	protein_coding	18	protocadherin gamma subfamily B, 2	PCDHGB2	910.681	0.362286	0.223692	0.057284	3.87037	0.00010867	0.0514033
ENSMUSG00000109122	A230103L15Rik	TEC	7	RIKEN cDNA A230103L15 gene		635.4	0.423707	0.241379	0.0587205	3.83804	0.000124019	0.0564054
ENSMUSG00000105983	Gm42770	TEC	5	predicted gene 42770		302.013	0.545643	0.231594	0.0579681	3.83137	0.000127432	0.0567747
ENSMUSG00000032333	Stoml1	protein_coding	9	stomatin-like 1	STOML1	2652.24	0.211838	0.171618	0.0455831	3.78625	0.000152935	0.0667744
ENSMUSG00000054889	Dsp	protein_coding	13	desmoplakin	DSP	91.3298	-1.19562	-0.120473	0.0392711	-3.78083	0.000156309	0.0669092
ENSMUSG00000027425	Kat14	protein_coding	2	lysine acetyltransferase 14	KAT14	1641.94	-0.252795	-0.190219	0.0505516	-3.7733	0.0001611	0.067634
ENSMUSG00000107707	Gm44286	TEC	6	predicted gene, 44286		132.308	0.76255	0.200816	0.0517603	3.762	0.000168561	0.0694313
ENSMUSG00000009621	Vav2	protein_coding	2	vav 2 oncogene	VAV2	2288.66	0.223123	0.179146	0.0473696	3.74484	0.000180508	0.0729753
ENSMUSG00000089791	Gm3555	processed_pseudogene	1	predicted pseudogene 3555		12.3724	3.43277	0.05334	0.0181928	3.70895	0.000208124	0.08261
ENSMUSG00000030255	Sspn	protein_coding	6	sarcospan	SSPN	1622.86	-0.339813	-0.213196	0.0570591	-3.69779	0.000217482	0.0847828
ENSMUSG00000028931	Kcnab2	protein_coding	4	potassium voltage-gated channel, shaker-related subfamily, beta member 2	KCNAB2	25946.8	-0.15399	-0.136852	0.0371326	-3.67906	0.000234091	0.089657
ENSMUSG00000001642	Akr1b3	protein_coding	6	aldo-keto reductase family 1, member B3 (aldose reductase)	AKR1B1	1286.81	-0.27435	-0.196492	0.0533183	-3.65373	0.000258461	0.0972837
ENSMUSG00000032327	Stra6	protein_coding	9	stimulated by retinoic acid gene 6	STRA6	100.795	-1.02582	-0.161039	0.0426202	-3.64687	0.000265456	0.0982231
ENSMUSG00000017390	Aldoc	protein_coding	11	aldolase C, fructose-bisphosphate	ALDOC	61195.9	-0.150399	-0.134112	0.0368223	-3.63232	0.000280881	0.102199
ENSMUSG00000016918	Sulf1	protein_coding	1	sulfatase 1	SULF1	1517.75	0.324608	0.208442	0.0567001	3.61675	0.000298324	0.106766
ENSMUSG00000103914	Gm38073	TEC	1	predicted gene, 38073		77.7359	0.952509	0.174124	0.0450381	3.61118	0.000304807	0.107326
ENSMUSG00000058174	Gm5148	protein_coding	3	predicted gene 5148		207.018	0.814367	0.170513	0.0488081	3.60286	0.00031473	0.108479
ENSMUSG00000104488	Gm38062	TEC	1	predicted gene, 38062		146.655	0.729904	0.190939	0.0517018	3.60016	0.000318019	0.108479
ENSMUSG00000063873	Slc24a3	protein_coding	2	solute carrier family 24 (sodium/potassium/calcium exchanger), member 3	SLC24A3	4360.91	-0.177141	-0.14936	0.0421691	-3.56127	0.00036906	0.123953
ENSMUSG00000026185	Igfbp5	protein_coding	1	insulin-like growth factor binding protein 5	IGFBP5	7228.02	0.202926	0.164811	0.0463766	3.52894	0.000417227	0.135179
ENSMUSG00000072476	Gm9008	protein_coding	6	predicted pseudogene 9008		55.1536	3.75248	0.0386887	0.0149614	3.5291	0.000416968	0.135179
ENSMUSG00000090326	Dthd1	protein_coding	5	death domain containing 1	DTHD1	22.4443	2.23659	0.0697916	0.0231337	3.52388	0.000425284	0.135179
ENSMUSG00000100671	Gm28322	lincRNA	1	predicted gene 28322		119.133	0.772327	0.174478	0.049743	3.52265	0.000427252	0.135179
ENSMUSG00000032221	Mns1	protein_coding	9	meiosis-specific nuclear structural protein 1	MNS1	311.235	-0.576763	-0.194178	0.0559415	-3.51353	0.000442188	0.137906
ENSMUSG00000036854	Hspb6	protein_coding	7	heat shock protein, alpha-crystallin-related, B6	HSPB6	433.057	-0.47217	-0.216559	0.0584104	-3.50726	0.000452742	0.139208
ENSMUSG00000048142	Nat8l	protein_coding	5	N-acetyltransferase 8-like	NAT8L	42095	-0.168888	-0.143897	0.0413141	-3.49574	0.000472741	0.141376
ENSMUSG00000063623	C230062I16Rik	transcribed_unprocessed_pseudogene	7	RIKEN cDNA C230062I16 gene		142.902	0.882364	0.1574	0.0458669	3.4965	0.000471397	0.141376
ENSMUSG00000107917	Gm44235	TEC	6	predicted gene, 44235		269.875	0.555765	0.210737	0.056545	3.49209	0.000479264	0.141389
ENSMUSG00000110631	Gm42047	lincRNA	8	predicted gene, 42047		270.598	-0.758237	-0.158376	0.0497373	-3.48766	0.000487273	0.141835
ENSMUSG00000054426	A930005H10Rik	processed_transcript	3	RIKEN cDNA A930005H10 gene		457.616	-0.389248	-0.210969	0.0587903	-3.47077	0.000518973	0.149075
ENSMUSG00000028532	Cachd1	protein_coding	4	cache domain containing 1	CACHD1	3552.84	-0.273181	-0.192345	0.0543618	-3.46724	0.000525823	0.149081
ENSMUSG00000020400	Tnip1	protein_coding	11	TNFAIP3 interacting protein 1	TNIP1	2031.96	-0.232951	-0.174361	0.0507228	-3.45408	0.000552184	0.154548
ENSMUSG00000035964	Tmem59l	protein_coding	8	transmembrane protein 59-like	TMEM59L	7930.45	-0.209571	-0.164496	0.0479446	-3.44738	0.00056605	0.156423
ENSMUSG00000046056	Sbsn	protein_coding	7	suprabasin	SBSN	73.9894	-0.90168	-0.162023	0.0445507	-3.44083	0.000579939	0.158086
ENSMUSG00000102317	Gm37628	TEC	1	predicted gene, 37628		420.598	0.503207	0.209462	0.0576466	3.43443	0.000593792	0.158086
ENSMUSG00000109505	Gm44677	TEC	7	predicted gene 44677		135.756	0.743029	0.184417	0.0501291	3.43572	0.000590985	0.158086
ENSMUSG00000025743	Sdc3	protein_coding	4	syndecan 3	SDC3	17903.1	0.143838	0.128606	0.0372372	3.42388	0.000617329	0.162372
ENSMUSG00000103427	Gm37534	TEC	1	predicted gene, 37534		470.128	0.402157	0.209704	0.0588736	3.41065	0.000648085	0.166451
ENSMUSG00000113698	Gm47987	TEC	12	predicted gene, 47987		187.452	0.572564	0.203517	0.0557021	3.41221	0.000644382	0.166451
ENSMUSG00000044788	Fads6	protein_coding	11	fatty acid desaturase domain family, member 6	FADS6	5482.45	0.204541	0.162943	0.0476591	3.39871	0.000677045	0.169892
ENSMUSG00000109239	Gm45176	TEC	7	predicted gene 45176		287.152	0.503346	0.21041	0.0575365	3.39886	0.000676667	0.169892
ENSMUSG00000102483	Catspere1	protein_coding	1	cation channel sperm associated auxiliary subunit epsilon 1	CATSPERE	376.757	-3.08347	-0.01651	0.015306	-3.38071	0.000722997	0.179361
ENSMUSG00000029778	Adcyap1r1	protein_coding	6	adenylate cyclase activating polypeptide 1 receptor 1	ADCYAP1R1	17963.8	0.138753	0.123396	0.0366969	3.36558	0.000763824	0.18125
ENSMUSG00000039463	Slc9a8	protein_coding	2	solute carrier family 9 (sodium/hydrogen exchanger), member 8	SLC9A8	3862.1	0.202376	0.160654	0.0476268	3.36633	0.000761767	0.18125
ENSMUSG00000079575	Rbpj-ps3	processed_pseudogene	6	recombination signal binding protein for immunoglobulin kappa J region, pseudogene 3		215.765	-0.723342	-0.163272	0.0499683	-3.36581	0.000763197	0.18125
ENSMUSG00000106826	Gm42583	TEC	6	predicted gene 42583		492.364	0.477782	0.20712	0.0580072	3.3744	0.000739781	0.18125
ENSMUSG00000032518	Rpsa	protein_coding	9	ribosomal protein SA	RPSA	14463.9	0.227024	0.168239	0.0508629	3.34768	0.000814921	0.191296
ENSMUSG00000018770	Atp5g3	protein_coding	2	ATP synthase, H+ transporting, mitochondrial F0 complex, subunit C3 (subunit 9)	ATP5MC3	7722.11	-0.14363	-0.128193	0.0378993	-3.34159	0.000833005	0.193444
ENSMUSG00000033174	Mgll	protein_coding	6	monoglyceride lipase	MGLL	3025.67	0.184241	0.150631	0.0452073	3.33662	0.000848031	0.193444
ENSMUSG00000039901	Armh3	protein_coding	19	armadillo-like helical domain containing 3	ARMH3	1681.3	0.231444	0.169496	0.0514218	3.33576	0.000850656	0.193444
ENSMUSG00000028648	Ndufs5	protein_coding	4	NADH:ubiquinone oxidoreductase core subunit S5	NDUFS5	1614.66	-0.363818	-0.184642	0.0586957	-3.32655	0.00087928	0.193895
ENSMUSG00000042406	Atf4	protein_coding	15	activating transcription factor 4	ATF4	4381.03	0.171359	0.143173	0.0431727	3.32841	0.000873423	0.193895
ENSMUSG00000058135	Gstm1	protein_coding	3	glutathione S-transferase, mu 1	GSTM5	10672.8	-0.171093	-0.143024	0.0431143	-3.33065	0.000866429	0.193895
ENSMUSG00000097311	Gm26871	processed_transcript	3	predicted gene, 26871		439.834	0.449902	0.202269	0.058383	3.31962	0.000901392	0.196783
ENSMUSG00000020524	Gria1	protein_coding	11	glutamate receptor, ionotropic, AMPA1 (alpha 1)	GRIA1	10246.6	0.172456	0.142793	0.0435669	3.30532	0.000948685	0.20275
ENSMUSG00000048087	Gm4737	protein_coding	16	predicted gene 4737		175.68	-3.13494	-0.0175856	0.0147774	-3.30299	0.000956589	0.20275
ENSMUSG00000085235	Gm12576	lincRNA	11	predicted gene 12576		40.6948	1.1288	0.125308	0.0377506	3.30799	0.000939667	0.20275
ENSMUSG00000061838	Suclg2	protein_coding	6	succinate-Coenzyme A ligase, GDP-forming, beta subunit	SUCLG2	1454.12	-0.239542	-0.173138	0.0526305	-3.28686	0.00101309	0.20557
ENSMUSG00000085873	Ttc39aos1	antisense	4	Ttc39a opposite strand RNA 1		355.717	0.43138	0.195413	0.0586081	3.29541	0.000982774	0.20557
ENSMUSG00000101609	Kcnq1ot1	antisense	7	KCNQ1 overlapping transcript 1	KCNQ1OT1	9444.49	0.250141	0.184692	0.053622	3.28579	0.00101697	0.20557
ENSMUSG00000109489	Gm7451	processed_pseudogene	8	predicted gene 7451		25.4425	1.71703	0.0809326	0.0269624	3.29288	0.000991666	0.20557
ENSMUSG00000109625	3110080E11Rik	TEC	8	RIKEN cDNA 3110080E11 gene		121.905	0.667442	0.181559	0.0517213	3.28849	0.00100726	0.20557
ENSMUSG00000003484	Cyp4f18	protein_coding	8	cytochrome P450, family 4, subfamily f, polypeptide 18	CYP4F2	41.7487	-1.44865	-0.0916414	0.0304282	-3.27338	0.00106269	0.205977
ENSMUSG00000022797	Tfrc	protein_coding	16	transferrin receptor	TFRC	8810.67	-0.173672	-0.147402	0.0440652	-3.27264	0.00106549	0.205977
ENSMUSG00000028393	Alad	protein_coding	4	aminolevulinate, delta-, dehydratase	ALAD	1393.24	0.750906	0.151808	0.048235	3.27369	0.00106151	0.205977
ENSMUSG00000036636	Clcn7	protein_coding	17	chloride channel, voltage-sensitive 7	CLCN7	3291.19	0.190323	0.153508	0.046694	3.27246	0.00106616	0.205977
ENSMUSG00000042251	Pm20d1	protein_coding	1	peptidase M20 domain containing 1	PM20D1	805.09	-0.426253	-0.163665	0.0586347	-3.27965	0.00103934	0.205977
ENSMUSG00000006360	Crip1	protein_coding	12	cysteine-rich protein 1 (intestinal)	CRIP1	223.257	-0.529987	-0.186991	0.0561241	-3.26466	0.00109597	0.207555
ENSMUSG00000029869	Ephb6	protein_coding	6	Eph receptor B6	EPHB6	2951.49	-0.181622	-0.148267	0.0454486	-3.26288	0.00110285	0.207555
ENSMUSG00000040234	Tm7sf3	protein_coding	6	transmembrane 7 superfamily member 3	TM7SF3	3395.42	0.191384	0.148816	0.0468991	3.26664	0.00108831	0.207555
ENSMUSG00000108352	Usf2-ps1	unprocessed_pseudogene	7	upstream transcription factor 2, pseudogene 1		39.918	1.95645	0.0514209	0.0234697	3.24614	0.00116981	0.218275
ENSMUSG00000023959	Clic5	protein_coding	17	chloride intracellular channel 5	CLIC5	1021.98	0.342784	0.181168	0.0585401	3.22005	0.00128169	0.237123
ENSMUSG00000053414	Hunk	protein_coding	16	hormonally upregulated Neu-associated kinase	HUNK	927.36	-0.32268	-0.184425	0.0581058	-3.20956	0.00132939	0.243882
ENSMUSG00000090386	Mir99ahg	processed_transcript	16	Mir99a and Mirlet7c-1 host gene (non-protein coding)		913.845	0.264659	0.183583	0.0552985	3.19934	0.00137745	0.250592
ENSMUSG00000042772	Smg7	protein_coding	1	Smg-7 homolog, nonsense mediated mRNA decay factor (C. elegans)	SMG7	6883.75	0.149809	0.129832	0.0404331	3.19493	0.00139867	0.25235
ENSMUSG00000096718	Zfp781	protein_coding	10	zinc finger protein 781		119.984	0.7367	0.158144	0.0483543	3.19233	0.0014113	0.252543
ENSMUSG00000028568	Btf3l4	protein_coding	4	basic transcription factor 3-like 4	BTF3L4	1902.85	-0.229685	-0.170332	0.052438	-3.17765	0.00148475	0.263525
ENSMUSG00000032269	Htr3a	protein_coding	9	5-hydroxytryptamine (serotonin) receptor 3A	HTR3A	193.79	-0.515775	-0.17157	0.056079	-3.16792	0.00153533	0.268142
ENSMUSG00000053040	Aph1c	protein_coding	9	aph1 homolog C, gamma secretase subunit		526.383	0.415507	0.181644	0.0585989	3.16884	0.00153048	0.268142
ENSMUSG00000032011	Thy1	protein_coding	9	thymus cell antigen 1, theta	THY1	25037.9	-0.127871	-0.113752	0.0361807	-3.15832	0.00158679	0.274931
ENSMUSG00000030303	Far2	protein_coding	6	fatty acyl CoA reductase 2	FAR2	740.539	0.294527	0.179834	0.0572478	3.15487	0.00160572	0.276019
ENSMUSG00000003039	Fam32a	protein_coding	8	family with sequence similarity 32, member A	FAM32A	4110.35	-0.222921	-0.162799	0.0519087	-3.15251	0.00161871	0.276078
ENSMUSG00000036863	Syde2	protein_coding	3	synapse defective 1, Rho GTPase, homolog 2 (C. elegans)	SYDE2	578.153	-0.325615	-0.187598	0.0583728	-3.13808	0.00170059	0.287796
ENSMUSG00000111356	Rpl32l	processed_pseudogene	10	ribosomal protein L32-like		91.7423	1.02984	0.118602	0.0383192	3.13565	0.00171475	0.287959
ENSMUSG00000030638	Sh3gl3	protein_coding	7	SH3-domain GRB2-like 3	SH3GL3	1764.51	0.25868	0.176784	0.0553684	3.11791	0.00182141	0.294543
ENSMUSG00000032303	Chrna3	protein_coding	9	cholinergic receptor, nicotinic, alpha polypeptide 3	CHRNA3	131.993	0.580787	0.159567	0.0536499	3.11974	0.0018101	0.294543
ENSMUSG00000092178	Gm45351	unprocessed_pseudogene	7	predicted gene 45351		15.3464	2.11148	0.0573499	0.0218938	3.12262	0.00179251	0.294543
ENSMUSG00000103924	Gm37895	TEC	1	predicted gene, 37895		532.427	0.453293	0.191722	0.0577312	3.12057	0.00180501	0.294543
ENSMUSG00000109418	Gm44800	TEC	8	predicted gene 44800		127.43	0.633619	0.17602	0.0517062	3.12031	0.0018066	0.294543
ENSMUSG00000028619	Tceanc2	protein_coding	4	transcription elongation factor A (SII) N-terminal and central domain containing 2	TCEANC2	1096.67	-0.40953	-0.175031	0.0585645	-3.1124	0.00185576	0.296603
ENSMUSG00000094622	Gm3055	protein_coding	10	predicted gene 3055	ZNF624	176.33	0.826443	0.122464	0.0442476	3.11151	0.00186133	0.296603
ENSMUSG00000103331	Gm37995	TEC	6	predicted gene, 37995		110.647	0.71825	0.159025	0.0483684	3.10874	0.00187887	0.29723
ENSMUSG00000061758	Akr1b10	protein_coding	6	aldo-keto reductase family 1, member B10 (aldose reductase)	AKR1B10,AKR1B15	1414.82	-0.246863	-0.167021	0.0545938	-3.09757	0.00195117	0.305285
ENSMUSG00000109224	Tmem147os	processed_transcript	7	transmembrane protein 147, opposite strand		54.5414	-1.01167	-0.13087	0.0381908	-3.09491	0.00196874	0.305285
ENSMUSG00000110308	Gm45516	TEC	8	predicted gene 45516		144.148	0.641687	0.165762	0.0510977	3.09446	0.00197174	0.305285
ENSMUSG00000026355	Mcm6	protein_coding	1	minichromosome maintenance complex component 6	MCM6	318.634	0.501992	0.170062	0.0561927	3.08929	0.00200635	0.306789
ENSMUSG00000058441	Panx2	protein_coding	15	pannexin 2	PANX2	7840.74	-0.138125	-0.121005	0.0390545	-3.08827	0.00201326	0.306789
ENSMUSG00000082791	Gm4875	processed_pseudogene	6	predicted gene 4875		34.9337	2.07906	0.0544936	0.0210057	3.08674	0.00202362	0.306789
ENSMUSG00000030228	Pik3c2g	protein_coding	6	phosphatidylinositol-4-phosphate 3-kinase catalytic subunit type 2 gamma	PIK3C2G	27.5296	1.68976	0.0709636	0.0255109	3.07737	0.00208836	0.309696
ENSMUSG00000103291	Gm38235	TEC	1	predicted gene, 38235		435.373	0.395674	0.194006	0.0586981	3.07788	0.0020848	0.309696
ENSMUSG00000107512	Gm44433	TEC	6	predicted gene, 44433		430.989	0.494578	0.184032	0.0563606	3.08013	0.00206912	0.309696
ENSMUSG00000107858	Gm43879	TEC	6	predicted gene, 43879		328.82	0.456023	0.191126	0.0575127	3.07578	0.00209954	0.309696
ENSMUSG00000106244	Gm43046	TEC	5	predicted gene 43046		170.982	0.551225	0.174604	0.0543747	3.06997	0.00214079	0.313662
ENSMUSG00000109162	2900027M19Rik	TEC	8	RIKEN cDNA 2900027M19 gene		267.635	0.555049	0.177966	0.054185	3.06794	0.00215542	0.3137
ENSMUSG00000001518	Itfg2	protein_coding	6	integrin alpha FG-GAP repeat containing 2	ITFG2	1563.3	0.199558	0.150763	0.0498197	3.06116	0.0022048	0.316664
ENSMUSG00000027318	Adam33	protein_coding	2	a disintegrin and metallopeptidase domain 33	ADAM33	302.569	0.615741	0.197275	0.051792	3.06192	0.00219922	0.316664
ENSMUSG00000032523	Hhatl	protein_coding	9	hedgehog acyltransferase-like	HHATL	1634.54	-0.255503	-0.165653	0.0555211	-3.05614	0.00224206	0.319912
ENSMUSG00000037022	Mmaa	protein_coding	8	methylmalonic aciduria (cobalamin deficiency) type A	MMAA	968.978	0.246744	0.168517	0.0548987	3.04584	0.00232028	0.324706
ENSMUSG00000104132	Gm36952	TEC	1	predicted gene, 36952		393.927	0.448169	0.187766	0.0575963	3.04716	0.00231012	0.324706
ENSMUSG00000105985	Gm42993	TEC	5	predicted gene 42993		125.947	0.659783	0.16386	0.0500437	3.0465	0.00231523	0.324706
ENSMUSG00000020102	Slc16a7	protein_coding	10	solute carrier family 16 (monocarboxylic acid transporters), member 7	SLC16A7	1418.51	0.246764	0.164306	0.0550123	3.02947	0.0024498	0.334591
ENSMUSG00000056222	Spock1	protein_coding	13	sparc/osteonectin, cwcv and kazal-like domains proteoglycan 1	SPOCK1	19375.8	-0.21548	-0.154971	0.0520367	-3.03137	0.00243448	0.334591
ENSMUSG00000086370	Ftx	lincRNA	X	Ftx transcript, Xist regulator (non-protein coding)	FTX	1430.96	0.285435	0.187149	0.0573768	3.02917	0.00245223	0.334591
ENSMUSG00000107947	Gm44438	TEC	6	predicted gene, 44438		313.261	0.471086	0.18536	0.056868	3.02984	0.00244684	0.334591
ENSMUSG00000109359	Gm44797	TEC	8	predicted gene 44797		142.205	0.710442	0.152403	0.0477727	3.019	0.00253611	0.343887
ENSMUSG00000046721	Rpl14-ps1	processed_pseudogene	7	ribosomal protein L14, pseudogene 1		145.113	-0.820038	-0.12119	0.0434183	-3.01592	0.002562	0.345254
ENSMUSG00000039536	Stau1	protein_coding	2	staufen double-stranded RNA binding protein 1	STAU1	4326.36	0.160339	0.132207	0.0442798	2.99852	0.00271293	0.363349
ENSMUSG00000033009	Ogfod1	protein_coding	8	2-oxoglutarate and iron-dependent oxygenase domain containing 1	OGFOD1	7680.05	0.140832	0.121973	0.0405227	2.99437	0.00275015	0.364153
ENSMUSG00000105733	Gm42973	TEC	3	predicted gene 42973		268.649	0.474814	0.182183	0.0565776	2.99229	0.00276897	0.364153
ENSMUSG00000114970	Gm49069	TEC	14	predicted gene, 49069		256.436	0.540559	0.174008	0.0542152	2.99246	0.00276742	0.364153
ENSMUSG00000081098	Gm12220	unprocessed_pseudogene	11	predicted gene 12220		4.30891	-4.93585	-0.0239509	0.010229	-2.98261	0.00285803	0.373615
ENSMUSG00000097304	Rpl31-ps15	processed_pseudogene	3	ribosomal protein L31, pseudogene 15		13.4235	-2.62654	-0.0352382	0.0163625	-2.96068	0.00306961	0.396524
ENSMUSG00000102250	Gm38260	TEC	1	predicted gene, 38260		246.386	0.520503	0.172083	0.0547663	2.96196	0.00305688	0.396524
ENSMUSG00000105574	Gm43648	TEC	5	predicted gene 43648		63.7396	0.826025	0.13563	0.043175	2.95196	0.00315762	0.405494
ENSMUSG00000104222	Gm7292	lincRNA	6	predicted gene 7292		1947.51	-2.12343	-0.0238043	0.0190471	-2.93801	0.00330327	0.420143
ENSMUSG00000108005	Gm44435	TEC	6	predicted gene, 44435		388.217	0.396677	0.188971	0.0584113	2.93736	0.00331018	0.420143
ENSMUSG00000105445	Gm42972	TEC	3	predicted gene 42972		361.935	0.444827	0.183356	0.0572256	2.9353	0.00333229	0.420505
ENSMUSG00000040690	Col16a1	protein_coding	4	collagen, type XVI, alpha 1	COL16A1	1955.85	0.214741	0.153735	0.0527342	2.93199	0.00336802	0.42257
ENSMUSG00000029455	Aldh2	protein_coding	5	aldehyde dehydrogenase 2, mitochondrial	ALDH2	5111.2	-0.155787	-0.12777	0.0441456	-2.92743	0.00341772	0.424873
ENSMUSG00000108993	Gm44846	TEC	7	predicted gene 44846		181.668	0.524686	0.167604	0.0543915	2.92674	0.0034253	0.424873
ENSMUSG00000022231	Sema5a	protein_coding	15	sema domain, seven thrombospondin repeats (type 1 and type 1-like), transmembrane domain (TM) and short cytoplasmic domain, (semaphorin) 5A	SEMA5A	8702.2	0.198533	0.150676	0.0509182	2.92112	0.00348773	0.427756
ENSMUSG00000110411	Gm45457	TEC	8	predicted gene 45457		179.008	0.517258	0.174503	0.0546718	2.92201	0.00347778	0.427756
ENSMUSG00000086652	Gm14029	antisense	2	predicted gene 14029		29.4453	2.06742	0.0833995	0.022407	2.91512	0.00355555	0.433639
ENSMUSG00000034714	Ttyh2	protein_coding	11	tweety family member 2	TTYH2	10555.1	0.170358	0.134031	0.0468966	2.90893	0.00362666	0.439853
ENSMUSG00000091476	Catspere2	protein_coding	1	cation channel sperm associated auxiliary subunit epsilon 2		1011.03	-0.875593	-0.0878663	0.0404018	-2.90714	0.00364747	0.439933
ENSMUSG00000024953	Prdx5	protein_coding	19	peroxiredoxin 5	PRDX5	5798.87	-0.153277	-0.129247	0.0439295	-2.90179	0.0037104	0.441011
ENSMUSG00000053279	Aldh1a1	protein_coding	19	aldehyde dehydrogenase family 1, subfamily A1	ALDH1A1	9187.23	-0.522645	-0.146523	0.0541801	-2.90446	0.00367884	0.441011
ENSMUSG00000074280	Gm6166	processed_pseudogene	9	predicted gene 6166		263.07	-2.52525	-0.0143138	0.0160084	-2.90123	0.00371701	0.441011
ENSMUSG00000027472	Pdrg1	protein_coding	2	p53 and DNA damage regulated 1	PDRG1	1785.36	0.235336	0.157246	0.0550039	2.89108	0.00383917	0.445321
ENSMUSG00000037151	Lrrc20	protein_coding	10	leucine rich repeat containing 20	LRRC20	1422.48	0.233593	0.157322	0.0548244	2.8955	0.00378557	0.445321
ENSMUSG00000047676	Rpsa-ps10	processed_pseudogene	3	ribosomal protein SA, pseudogene 10		1625.94	-3.16934	-0.0208595	0.0127592	-2.89089	0.00384154	0.445321
ENSMUSG00000074415	Mir100hg	processed_transcript	9	Mir100 Mirlet7a-2 Mir125b-1 cluster host gene	MIR100HG	4664.47	0.161827	0.13332	0.0456204	2.88943	0.00385947	0.445321
ENSMUSG00000105940	Gm42635	TEC	5	predicted gene 42635		203.762	0.48797	0.174993	0.0555491	2.8881	0.00387573	0.445321
ENSMUSG00000111664	Gm48865	TEC	10	predicted gene, 48865		40.8096	1.07692	0.0922898	0.0350653	2.8896	0.00385729	0.445321
ENSMUSG00000033065	Pfkm	protein_coding	15	phosphofructokinase, muscle	PFKM	20116.8	-0.111927	-0.101492	0.0349744	-2.88491	0.00391528	0.447511
ENSMUSG00000105891	A230001M10Rik	lincRNA	3	RIKEN cDNA A230001M10 gene		844.47	0.258666	0.159916	0.0566869	2.88279	0.00394165	0.448178
ENSMUSG00000000296	Tpd52l1	protein_coding	10	tumor protein D52-like 1	TPD52L1	650.514	-0.321425	-0.161764	0.0587831	-2.87124	0.0040887	0.448545
ENSMUSG00000020679	Hnf1b	protein_coding	11	HNF1 homeobox B	HNF1B	39.2475	1.03886	0.0995214	0.0359164	2.8781	0.00400082	0.448545
ENSMUSG00000047181	Samd14	protein_coding	11	sterile alpha motif domain containing 14	SAMD14	3029.57	0.184536	0.140942	0.0494189	2.87482	0.00404264	0.448545
ENSMUSG00000055421	Pcdh9	protein_coding	14	protocadherin 9	PCDH9	21490.7	0.143636	0.122358	0.0422806	2.87669	0.00401875	0.448545
ENSMUSG00000055560	Zfp459	protein_coding	13	zinc finger protein 459		87.1815	-0.712468	-0.127909	0.0461568	-2.87399	0.00405325	0.448545
ENSMUSG00000061298	Agbl4	protein_coding	4	ATP/GTP binding protein-like 4	AGBL4	707.299	0.264796	0.164029	0.0570812	2.87162	0.00408377	0.448545
ENSMUSG00000106087	Gm43609	TEC	3	predicted gene 43609		23.0314	1.36467	0.0888677	0.0293741	2.87324	0.00406287	0.448545
ENSMUSG00000030614	Tmem126b	protein_coding	7	transmembrane protein 126B	TMEM126B	1548.73	-0.193467	-0.147531	0.0507725	-2.86315	0.00419452	0.448875
ENSMUSG00000039004	Bmp6	protein_coding	13	bone morphogenetic protein 6	BMP6	689.051	-0.386955	-0.168688	0.0583934	-2.86765	0.0041353	0.448875
ENSMUSG00000040483	Xaf1	protein_coding	11	XIAP associated factor 1	XAF1	483.726	-0.526519	-0.161925	0.0537322	-2.86569	0.00416104	0.448875
ENSMUSG00000053907	Mat2a	protein_coding	6	methionine adenosyltransferase II, alpha	MAT2A	11220	-0.129111	-0.112818	0.0392898	-2.86355	0.0041892	0.448875
ENSMUSG00000055826	Tescl	protein_coding	7	tescalcin-like		5.64941	3.94273	0.0330804	0.0141443	2.86581	0.0041594	0.448875
ENSMUSG00000059834	Sclt1	protein_coding	3	sodium channel and clathrin linker 1	SCLT1	1326.67	0.225814	0.157618	0.0543956	2.85883	0.00425203	0.450612
ENSMUSG00000106664	Gm17936	processed_pseudogene	5	predicted gene, 17936		79.1333	-0.99794	-0.0981753	0.0363751	-2.85939	0.00424462	0.450612
ENSMUSG00000112367	A230081H15Rik	TEC	10	Riken cDNA A230081H15 gene		191.676	0.515303	0.163299	0.0542334	2.85487	0.00430547	0.454072
ENSMUSG00000077681	Gm22496	snoRNA	7	predicted gene, 22496		63.0178	0.942378	0.144651	0.0387308	2.85115	0.00435615	0.457208
ENSMUSG00000058600	Rpl30	protein_coding	15	ribosomal protein L30	RPL30	3773.36	-0.244222	-0.155978	0.0559769	-2.84781	0.00440219	0.459828
ENSMUSG00000004366	Sst	protein_coding	16	somatostatin	SST	3045.59	-0.164683	-0.131909	0.0466448	-2.83736	0.00454882	0.472882
ENSMUSG00000102816	Gm37814	sense_intronic	2	predicted gene, 37814		156.39	0.573692	0.158945	0.051659	2.83181	0.00462847	0.478882
ENSMUSG00000021510	Zfp729a	protein_coding	13	zinc finger protein 729a	ZNF729	1909.61	0.22533	0.153303	0.0545771	2.8283	0.00467955	0.479621
ENSMUSG00000109125	Gm45159	lincRNA	7	predicted gene 45159		1042.5	0.312339	0.173885	0.0587308	2.82938	0.00466388	0.479621
ENSMUSG00000036466	Megf11	protein_coding	9	multiple EGF-like-domains 11	MEGF11	1214.58	-0.209348	-0.148874	0.0530687	-2.81865	0.0048226	0.490177
ENSMUSG00000038370	Pcp4l1	protein_coding	1	Purkinje cell protein 4-like 1	PCP4L1	9111.47	-0.133863	-0.114994	0.0408144	-2.81833	0.00482745	0.490177
ENSMUSG00000024862	Klc2	protein_coding	19	kinesin light chain 2	KLC2	16347.1	-0.113148	-0.101284	0.0359742	-2.81503	0.00487732	0.491148
ENSMUSG00000032883	Acsl3	protein_coding	1	acyl-CoA synthetase long-chain family member 3	ACSL3	12922.6	-0.125012	-0.109995	0.038879	-2.81197	0.00492385	0.491148
ENSMUSG00000040258	Nxph4	protein_coding	10	neurexophilin 4	NXPH4	1338.93	0.211429	0.148447	0.0533243	2.81264	0.00491359	0.491148
ENSMUSG00000113456	Gm30738	processed_pseudogene	12	predicted gene, 30738		28.4802	1.22955	0.0868588	0.0309997	2.81177	0.004927	0.491148
ENSMUSG00000018931	Natd1	protein_coding	11	N-acetyltransferase domain containing 1	NATD1	1208.65	0.231999	0.155109	0.0553199	2.80283	0.00506567	0.500401
ENSMUSG00000037771	Slc32a1	protein_coding	2	solute carrier family 32 (GABA vesicular transporter), member 1	SLC32A1	8684.77	-0.135054	-0.116277	0.0412358	-2.80289	0.00506473	0.500401
ENSMUSG00000022619	Mapk8ip2	protein_coding	15	mitogen-activated protein kinase 8 interacting protein 2	MAPK8IP2	21088.4	-0.107162	-0.0972012	0.0345975	-2.79951	0.00511796	0.501033
ENSMUSG00000105958	Gm43319	TEC	5	predicted gene 43319		95.2622	0.688889	0.136657	0.0465979	2.79953	0.00511763	0.501033
ENSMUSG00000087437	Gm13112	antisense	4	predicted gene 13112		163.864	-0.691524	-0.126781	0.0461125	-2.79516	0.00518748	0.50557
ENSMUSG00000096010	H4f16	protein_coding	6	H4 histone 16	H4-16	222.282	0.69444	0.123481	0.0460585	2.79092	0.00525592	0.509964
ENSMUSG00000056763	Cspp1	protein_coding	1	centrosome and spindle pole associated protein 1	CSPP1	1564.63	0.206039	0.152951	0.0529841	2.78266	0.0053916	0.520814
ENSMUSG00000025203	Scd2	protein_coding	19	stearoyl-Coenzyme A desaturase 2	SCD	194761	-0.145328	-0.123147	0.043624	-2.78023	0.00543201	0.522406
ENSMUSG00000001270	Ckb	protein_coding	12	creatine kinase, brain	CKB	66263	-0.219988	-0.150472	0.054484	-2.77562	0.00550966	0.52755
ENSMUSG00000024664	Fads3	protein_coding	19	fatty acid desaturase 3	FADS3	1329.22	0.201386	0.144985	0.0525655	2.76886	0.00562525	0.529451
ENSMUSG00000027951	Adar	protein_coding	3	adenosine deaminase, RNA-specific	ADAR	10626.6	0.180992	0.138869	0.0498784	2.77202	0.00557102	0.529451
ENSMUSG00000042116	Vwa1	protein_coding	4	von Willebrand factor A domain containing 1	VWA1	3142.27	0.167741	0.131586	0.0478336	2.76949	0.00561444	0.529451
ENSMUSG00000106408	Gm43321	TEC	5	predicted gene 43321		90.111	0.835808	0.110186	0.0406658	2.76748	0.0056492	0.529451
ENSMUSG00000113386	Gm47357	sense_intronic	12	predicted gene, 47357		10.7065	2.10139	0.0489713	0.0198451	2.76739	0.00565078	0.529451
ENSMUSG00000008683	Rps15a	protein_coding	7	ribosomal protein S15A	RPS15A	6631.58	0.19733	0.139924	0.0521687	2.76038	0.00577346	0.53407
ENSMUSG00000049436	Upk1b	protein_coding	16	uroplakin 1B	UPK1B	21.0371	2.17564	0.0380531	0.0182892	2.76115	0.00575978	0.53407
ENSMUSG00000103805	Gm37063	TEC	16	predicted gene, 37063		93.9933	0.632838	0.139263	0.048518	2.76046	0.00577205	0.53407
ENSMUSG00000104655	Gm43317	TEC	5	predicted gene 43317		180.325	0.456209	0.165992	0.055913	2.75797	0.00581613	0.534245
ENSMUSG00000105700	Gm42772	TEC	5	predicted gene 42772		72.1999	0.742031	0.125231	0.0440994	2.75751	0.0058243	0.534245
ENSMUSG00000032322	Pstpip1	protein_coding	9	proline-serine-threonine phosphatase-interacting protein 1	PSTPIP1	231.827	0.414466	0.154756	0.0573266	2.75609	0.00584972	0.534331
ENSMUSG00000044534	Ackr2	protein_coding	9	atypical chemokine receptor 2	ACKR2	23.85	-1.49869	-0.0594967	0.0251752	-2.75258	0.00591269	0.537833
ENSMUSG00000020444	Guk1	protein_coding	11	guanylate kinase 1	GUK1	3072.56	-0.239525	-0.152845	0.0563051	-2.73902	0.00616218	0.558202
ENSMUSG00000097073	9430037G07Rik	lincRNA	9	RIKEN cDNA 9430037G07 gene		250.532	0.596849	0.138456	0.0496355	2.73335	0.00626938	0.563238
ENSMUSG00000109874	Gm9911	TEC	8	predicted gene 9911		52.3592	0.899945	0.110278	0.0384319	2.73339	0.00626851	0.563238
ENSMUSG00000047907	Tshz2	protein_coding	2	teashirt zinc finger family member 2	TSHZ2	8967.32	-0.12225	-0.106504	0.0390876	-2.73021	0.00632934	0.566295
ENSMUSG00000108070	Gm43872	TEC	6	predicted gene, 43872		229.932	0.423927	0.174457	0.0568925	2.72595	0.00641159	0.571312
ENSMUSG00000024937	Ehbp1l1	protein_coding	19	EH domain binding protein 1-like 1	EHBP1L1	700.939	0.267647	0.159307	0.057871	2.72161	0.00649646	0.573704
ENSMUSG00000029762	Akr1b8	protein_coding	6	aldo-keto reductase family 1, member B8	AKR1B10,AKR1B15	96.9161	-0.710391	-0.102457	0.0445993	-2.71835	0.00656075	0.573704
ENSMUSG00000034187	Nsf	protein_coding	11	N-ethylmaleimide sensitive fusion protein	NSF	45307.7	-0.106514	-0.0961561	0.0352673	-2.71696	0.00658839	0.573704
ENSMUSG00000064246	Chil1	protein_coding	1	chitinase-like 1	CHI3L1	1440.44	-0.316317	-0.148602	0.0588704	-2.7207	0.00651434	0.573704
ENSMUSG00000096351	Samd11	protein_coding	4	sterile alpha motif domain containing 11	SAMD11	196.503	1.29716	0.0555867	0.0279582	2.71658	0.00659611	0.573704
ENSMUSG00000105692	Gm43737	TEC	3	predicted gene 43737		467.307	0.280605	0.162195	0.0583115	2.7183	0.00656175	0.573704
ENSMUSG00000033792	Atp7a	protein_coding	X	ATPase, Cu++ transporting, alpha polypeptide	ATP7A	1307.16	0.210598	0.147058	0.0540384	2.71194	0.00668903	0.578027
ENSMUSG00000103800	Pcdha8	protein_coding	18	protocadherin alpha 8	PCDHA9	142.526	0.672958	0.128494	0.046229	2.71042	0.0067199	0.578027
ENSMUSG00000104696	Gm42946	TEC	3	predicted gene 42946		129.628	0.543067	0.154291	0.0519607	2.71015	0.00672525	0.578027
ENSMUSG00000025867	Cplx2	protein_coding	13	complexin 2	CPLX2	13033.6	-0.139326	-0.117032	0.0432518	-2.69955	0.00694324	0.592101
ENSMUSG00000033720	Sfxn5	protein_coding	6	sideroflexin 5	SFXN5	11921.5	-0.113634	-0.100515	0.0372876	-2.7003	0.00692777	0.592101
ENSMUSG00000029875	Ccdc184	protein_coding	15	coiled-coil domain containing 184	CCDC184	2481.43	-0.173288	-0.133543	0.0494444	-2.69788	0.00697829	0.592742
ENSMUSG00000037016	Frem2	protein_coding	3	Fras1 related extracellular matrix protein 2	FREM2	524.692	0.33752	0.153626	0.0587964	2.6966	0.00700506	0.592742
ENSMUSG00000029608	Rph3a	protein_coding	5	rabphilin 3A	RPH3A	37193.2	-0.126222	-0.108726	0.0404016	-2.69513	0.00703615	0.593074
ENSMUSG00000025766	D3Ertd751e	protein_coding	3	DNA segment, Chr 3, ERATO Doi 751, expressed	C4orf33	1185.24	0.251481	0.140786	0.0572655	2.69153	0.00711247	0.597201
ENSMUSG00000102465	Gm38198	TEC	1	predicted gene, 38198		295.216	0.454919	0.160405	0.055479	2.68807	0.0071866	0.601114
ENSMUSG00000030532	Hddc3	protein_coding	7	HD domain containing 3	HDDC3	1112.21	0.355962	0.178314	0.0585122	2.67911	0.00738176	0.612742
ENSMUSG00000109744	Gm45461	TEC	8	predicted gene 45461		301.675	0.434542	0.16488	0.0562112	2.67932	0.00737718	0.612742
ENSMUSG00000030287	Itpr2	protein_coding	6	inositol 1,4,5-triphosphate receptor 2	ITPR2	3227.58	0.174123	0.133603	0.0497725	2.67694	0.00742977	0.61287
ENSMUSG00000063897	CAAA01118383.1	protein_coding	GL456216.1	dehydrogenase/reductase (SDR family) X chromosome		318.615	-0.402404	-0.151156	0.0572692	-2.67535	0.00746517	0.61287
ENSMUSG00000104571	Gm43010	TEC	3	predicted gene 43010		72.1718	0.712255	0.124236	0.0444161	2.67524	0.00746752	0.61287
ENSMUSG00000104871	Gm42639	TEC	5	predicted gene 42639		101.598	0.673271	0.133	0.0459227	2.6705	0.00757374	0.61926
ENSMUSG00000018819	Lsp1	protein_coding	7	lymphocyte specific 1	LSP1	404.218	-0.351789	-0.15426	0.0585473	-2.66888	0.00761039	0.619935
ENSMUSG00000031066	Usp11	protein_coding	X	ubiquitin specific peptidase 11	USP11	6150.22	-0.132966	-0.113037	0.0423117	-2.66025	0.00780817	0.633681
ENSMUSG00000051335	Gfod1	protein_coding	13	glucose-fructose oxidoreductase domain containing 1	GFOD1	5716.8	-0.168687	-0.127524	0.0491677	-2.65344	0.00796763	0.641969
ENSMUSG00000108918	Gm44802	TEC	8	predicted gene 44802		112.075	0.658865	0.131625	0.0462723	2.65338	0.00796911	0.641969
ENSMUSG00000021070	Bdkrb2	protein_coding	12	bradykinin receptor, beta 2	BDKRB2	691.413	0.322964	0.155186	0.058856	2.64677	0.00812644	0.643371
ENSMUSG00000021556	Golm1	protein_coding	13	golgi membrane protein 1	GOLM1	1312.75	0.20603	0.144961	0.0541043	2.64497	0.00816984	0.643371
ENSMUSG00000026418	Tnni1	protein_coding	1	troponin I, skeletal, slow 1	TNNI1	339.894	0.386087	0.145376	0.057714	2.65005	0.00804806	0.643371
ENSMUSG00000032936	Camkv	protein_coding	9	CaM kinase-like vesicle-associated	CAMKV	3666.06	-0.15562	-0.123662	0.0470265	-2.64526	0.00816292	0.643371
ENSMUSG00000102498	Gm19445	TEC	3	predicted gene, 19445		445.281	0.376351	0.165275	0.0579436	2.64402	0.0081928	0.643371
ENSMUSG00000105861	Gm43508	TEC	5	predicted gene 43508		55.8478	0.791182	0.112718	0.0411773	2.65005	0.00804804	0.643371
ENSMUSG00000116881	Gm49674	TEC	16	predicted gene, 49674		285.24	0.486441	0.151185	0.0537942	2.64414	0.00818992	0.643371
ENSMUSG00000006574	Slc4a1	protein_coding	11	solute carrier family 4 (anion exchanger), member 1	SLC4A1	110.293	0.68767	0.145199	0.0459198	2.63973	0.00829731	0.643853
ENSMUSG00000036545	Adamts2	protein_coding	11	a disintegrin-like and metallopeptidase (reprolysin type) with thrombospondin type 1 motif, 2	ADAMTS2	1283.91	0.213968	0.14477	0.054924	2.63893	0.00831691	0.643853
ENSMUSG00000064179	Tnnt1	protein_coding	7	troponin T1, skeletal, slow	TNNT1	21.7864	1.44604	0.063455	0.0255122	2.6405	0.00827842	0.643853
ENSMUSG00000104651	Gm21168	processed_pseudogene	5	predicted gene, 21168		492.451	0.374256	0.162731	0.0579855	2.64125	0.00826016	0.643853
ENSMUSG00000029212	Gabrb1	protein_coding	5	gamma-aminobutyric acid (GABA) A receptor, subunit beta 1	GABRB1	10135.8	0.118239	0.103995	0.0391428	2.63546	0.00840221	0.646007
ENSMUSG00000035967	Ints6l	protein_coding	X	integrator complex subunit 6 like	INTS6L	2600.66	0.214497	0.147928	0.055034	2.63183	0.0084927	0.646007
ENSMUSG00000103544	Gm10048	TEC	5	predicted gene 10048		150.005	0.5283	0.145682	0.0518814	2.63472	0.00842075	0.646007
ENSMUSG00000106537	Gm43502	TEC	5	predicted gene 43502		70.2209	0.721354	0.124712	0.0436506	2.63254	0.00847482	0.646007
ENSMUSG00000109529	Gm44801	TEC	8	predicted gene 44801		124.783	0.631392	0.135358	0.0472354	2.63269	0.00847107	0.646007
ENSMUSG00000006315	Tmem147	protein_coding	7	transmembrane protein 147	TMEM147	2294.99	-0.161398	-0.128624	0.0482052	-2.63004	0.00853756	0.646702
ENSMUSG00000020205	Phlda1	protein_coding	10	pleckstrin homology like domain, family A, member 1	PHLDA1	726.818	-0.265258	-0.151547	0.0581422	-2.62793	0.00859069	0.646702
ENSMUSG00000031785	Adgrg1	protein_coding	8	adhesion G protein-coupled receptor G1	ADGRG1	6595.71	0.164808	0.128479	0.0487962	2.62795	0.00859007	0.646702
ENSMUSG00000021536	Adcy2	protein_coding	13	adenylate cyclase 2	ADCY2	3342.46	-0.147236	-0.121078	0.045743	-2.6182	0.00883938	0.654144
ENSMUSG00000038540	Tmc3	protein_coding	7	transmembrane channel-like gene family 3	TMC3	218.755	-0.610114	-0.127586	0.0477731	-2.61854	0.00883078	0.654144
ENSMUSG00000076928	Trac	TR_C_gene	14	T cell receptor alpha constant		73.3481	-0.756436	-0.11131	0.0416489	-2.61899	0.00881912	0.654144
ENSMUSG00000102234	Gm37885	antisense	1	predicted gene, 37885		649.849	-0.372856	-0.14991	0.0579219	-2.62015	0.00878921	0.654144
ENSMUSG00000102747	Gm37602	TEC	1	predicted gene, 37602		226.375	0.453622	0.158215	0.0550824	2.62264	0.0087251	0.654144
ENSMUSG00000025780	Itih5	protein_coding	2	inter-alpha (globulin) inhibitor H5	ITIH5	4422.35	-0.158866	-0.125247	0.0479513	-2.61266	0.00898412	0.662609
ENSMUSG00000101249	Gm29216	unprocessed_pseudogene	1	predicted gene 29216		1140.16	-0.271494	-0.150964	0.0583945	-2.60961	0.00906463	0.664146
ENSMUSG00000108956	Gm45179	TEC	7	predicted gene 45179		113.962	0.538994	0.146383	0.0512314	2.60956	0.00906581	0.664146
ENSMUSG00000034171	Faah	protein_coding	4	fatty acid amide hydrolase	FAAH	2646.92	0.246557	0.147669	0.0574649	2.60086	0.00929901	0.678952
ENSMUSG00000058581	Gm5801	processed_pseudogene	14	predicted pseudogene 5801		82.3817	1.03916	0.0518245	0.0328043	2.59874	0.00935667	0.680885
ENSMUSG00000071719	Tmem28	protein_coding	X	transmembrane protein 28	FAM155B	1638.96	0.183452	0.137582	0.0518688	2.59709	0.00940169	0.681888
ENSMUSG00000025269	Apex2	protein_coding	X	apurinic/apyrimidinic endonuclease 2	APEX2	535.385	0.271658	0.162368	0.0584199	2.59482	0.00946416	0.684146
ENSMUSG00000041263	Rusc1	protein_coding	3	RUN and SH3 domain containing 1	RUSC1	5007.3	-0.118953	-0.102511	0.0398287	-2.59	0.00959754	0.691498
ENSMUSG00000102516	Gm38340	TEC	7	predicted gene, 38340		114.357	0.717923	0.104263	0.0430681	2.58663	0.00969208	0.696012
ENSMUSG00000023011	Faim2	protein_coding	15	Fas apoptotic inhibitory molecule 2	FAIM2	38045.6	-0.106526	-0.094543	0.0367214	-2.58181	0.0098285	0.696643
ENSMUSG00000046230	Vps13a	protein_coding	19	vacuolar protein sorting 13A	VPS13A	5834.41	0.151104	0.122368	0.0468711	2.58237	0.00981255	0.696643
ENSMUSG00000053985	Zfp14	protein_coding	7	zinc finger protein 14	ZFP14	883.741	-0.209321	-0.14843	0.0549235	-2.58368	0.00977537	0.696643
ENSMUSG00000057177	Gsk3a	protein_coding	7	glycogen synthase kinase 3 alpha	GSK3A	7187.49	-0.120647	-0.104862	0.0403163	-2.58359	0.00977793	0.696643
ENSMUSG00000027533	Fabp5	protein_coding	3	fatty acid binding protein 5, epidermal	FABP5	3890.55	0.215633	0.136432	0.0555257	2.57801	0.00993697	0.697537
ENSMUSG00000071866	Ppia	protein_coding	11	peptidylprolyl isomerase A	PPIA	22133.8	-0.110095	-0.0990552	0.037704	-2.57873	0.00991646	0.697537
ENSMUSG00000111229	Gm39323	lincRNA	9	predicted gene, 39323		36.6821	0.912942	0.0849711	0.0364329	2.57948	0.00989501	0.697537
ENSMUSG00000103214	Gm38286	TEC	1	predicted gene, 38286		267.784	0.543646	0.137609	0.0505324	2.57643	0.0099826	0.698494
ENSMUSG00000104525	Gm37334	TEC	1	predicted gene, 37334		341.987	0.42519	0.16103	0.0558779	2.56995	0.0101713	0.709426
ENSMUSG00000040945	Rcc2	protein_coding	4	regulator of chromosome condensation 2	RCC2	5026.04	-0.120463	-0.104131	0.0404719	-2.56598	0.0102885	0.713041
ENSMUSG00000099924	Gm28320	sense_intronic	1	predicted gene 28320		194.242	0.406008	0.150427	0.0566147	2.56669	0.0102675	0.713041
ENSMUSG00000018593	Sparc	protein_coding	11	secreted acidic cysteine rich glycoprotein	SPARC	53297.4	-0.124147	-0.106884	0.0414638	-2.55662	0.0105694	0.718668
ENSMUSG00000040540	Ctdsp2-ps	processed_pseudogene	10	CTD (carboxy-terminal domain, RNA polymerase II, polypeptide A) small phosphatase 2, pseudogene		119.109	-2.58948	-0.0132094	0.0138576	-2.55861	0.0105091	0.718668
ENSMUSG00000083554	Gm6645	processed_pseudogene	X	predicted gene 6645		7.74325	2.65036	0.0333539	0.0152531	2.56097	0.0104381	0.718668
ENSMUSG00000106024	A530083M17Rik	TEC	3	RIKEN cDNA A530083M17 gene		113.853	0.535011	0.137678	0.0508401	2.55561	0.0106001	0.718668
ENSMUSG00000110444	Gm10033	protein_coding	8	predicted gene 10033		1252.58	-0.245238	-0.139786	0.0575957	-2.55875	0.0105049	0.718668
ENSMUSG00000113073	Gm48261	TEC	13	predicted gene, 48261		94.9555	0.590686	0.132208	0.0482903	2.55601	0.0105879	0.718668
ENSMUSG00000116845	Gm46546	processed_pseudogene	16	predicted gene, 46546		10.0809	2.26409	0.0371335	0.0170612	2.56038	0.0104557	0.718668
ENSMUSG00000110246	C130073E24Rik	lincRNA	8	RIKEN cDNA C130073E24 gene		494.72	0.305327	0.165644	0.058874	2.55275	0.0106875	0.722348
ENSMUSG00000049047	Armcx3	protein_coding	X	armadillo repeat containing, X-linked 3	ARMCX3	2305.96	-0.163052	-0.123978	0.0493102	-2.55117	0.0107361	0.722449
ENSMUSG00000081264	Gm14021	processed_pseudogene	2	predicted gene 14021		98.3046	0.592719	0.13382	0.0481418	2.55055	0.0107552	0.722449
ENSMUSG00000020520	Galnt10	protein_coding	11	polypeptide N-acetylgalactosaminyltransferase 10	GALNT10	1776.49	0.165247	0.128263	0.0496908	2.54776	0.0108417	0.723808
ENSMUSG00000063953	Amd2	protein_coding	10	S-adenosylmethionine decarboxylase 2		210.379	0.415966	0.122657	0.0561548	2.54878	0.0108102	0.723808
ENSMUSG00000053093	Myh7	protein_coding	14	myosin, heavy polypeptide 7, cardiac muscle, beta	MYH7	205.634	-0.402571	-0.131334	0.0565428	-2.54372	0.010968	0.726705
ENSMUSG00000106414	Gm43320	TEC	5	predicted gene 43320		108.389	0.5789	0.130806	0.0486656	2.54319	0.0109846	0.726705
ENSMUSG00000109095	Gm44799	TEC	8	predicted gene 44799		75.5927	0.735715	0.113216	0.0419973	2.54318	0.010985	0.726705
ENSMUSG00000030401	Rtn2	protein_coding	7	reticulon 2 (Z-band associated protein)	RTN2	3610.16	-0.133791	-0.111816	0.0438753	-2.53753	0.0111637	0.734079
ENSMUSG00000094095	Gm25648	snoRNA	7	predicted gene, 25648		66.2213	0.90287	0.123387	0.0363598	2.53763	0.0111607	0.734079
ENSMUSG00000086118	Gm14169	processed_transcript	2	predicted gene 14169		117.002	-0.533995	-0.131278	0.0504172	-2.53035	0.0113948	0.744788
ENSMUSG00000087149	Itih5l-ps	transcribed_unprocessed_pseudogene	X	inter-alpha (globulin) inhibitor H5-like, pseudogene	ITIH6	39.4533	-3.69704	-0.0143154	0.00976017	-2.53083	0.0113792	0.744788
ENSMUSG00000019370	Calm3	protein_coding	7	calmodulin 3	CALM3	71651.9	-0.106268	-0.0946737	0.0372468	-2.52886	0.0114433	0.745725
ENSMUSG00000005882	Uqcc1	protein_coding	2	ubiquinol-cytochrome c reductase complex assembly factor 1	UQCC1	3043.22	0.163605	0.123203	0.049641	2.52762	0.011484	0.746152
ENSMUSG00000033491	Prss35	protein_coding	9	protease, serine 35	PRSS35	186.334	0.408036	0.132609	0.0562813	2.52388	0.0116067	0.746493
ENSMUSG00000103867	9630010A21Rik	TEC	1	RIKEN cDNA 9630010A21 gene		208.086	0.413283	0.156381	0.0560919	2.52503	0.0115688	0.746493
ENSMUSG00000108077	6330415B21Rik	TEC	6	RIKEN cDNA 6330415B21 gene		151.519	0.482389	0.150002	0.0530415	2.52572	0.0115461	0.746493
ENSMUSG00000111063	Zkscan7	transcribed_unprocessed_pseudogene	9	zinc finger with KRAB and SCAN domains 7	ZKSCAN7	216.344	-0.417726	-0.140962	0.0557819	-2.5233	0.011626	0.746493
ENSMUSG00000022548	Apod	protein_coding	16	apolipoprotein D	APOD	32799.1	-0.180623	-0.131936	0.052238	-2.51991	0.0117386	0.747595
ENSMUSG00000104860	Gm42510	TEC	3	predicted gene 42510		27.1422	1.06074	0.0786422	0.0317928	2.51919	0.0117625	0.747595
ENSMUSG00000104929	Gm42766	TEC	5	predicted gene 42766		100.361	0.58089	0.131278	0.0483503	2.51866	0.0117802	0.747595
ENSMUSG00000109498	Gm45222	TEC	7	predicted gene 45222		284.517	0.351573	0.154795	0.0581459	2.52142	0.0116883	0.747595
ENSMUSG00000026223	Itm2c	protein_coding	1	integral membrane protein 2C	ITM2C	21047	-0.127138	-0.108649	0.04264	-2.51537	0.0118908	0.74809
ENSMUSG00000086842	Gm15681	processed_pseudogene	8	predicted gene 15681		99.9823	0.581784	0.127953	0.0482446	2.51549	0.0118866	0.74809
ENSMUSG00000109575	Gm44831	TEC	7	predicted gene 44831		216.482	0.462639	0.157826	0.0538523	2.51562	0.0118822	0.74809
ENSMUSG00000090257	Gm4524	antisense	16	predicted gene 4524		87.9393	0.674393	0.10117	0.0440442	2.51373	0.0119463	0.749421
ENSMUSG00000028962	Slc4a2	protein_coding	5	solute carrier family 4 (anion exchanger), member 2	SLC4A2	6350.15	0.164022	0.123109	0.049872	2.51255	0.0119861	0.749766
ENSMUSG00000018547	Pip4k2b	protein_coding	11	phosphatidylinositol-5-phosphate 4-kinase, type II, beta	PIP4K2B	7609.72	0.120054	0.103001	0.0410281	2.50902	0.0121066	0.755141
ENSMUSG00000032289	Thsd4	protein_coding	9	thrombospondin, type I, domain containing 4	THSD4	988.21	-0.342682	-0.124199	0.0582983	-2.50758	0.0121561	0.756066
ENSMUSG00000032373	Car12	protein_coding	9	carbonic anhydrase 12	CA12	385.925	-0.452599	-0.107757	0.0541205	-2.50654	0.0121919	0.75614
ENSMUSG00000071661	Zbtb3	protein_coding	19	zinc finger and BTB domain containing 3	ZBTB3	158.255	0.440658	0.135931	0.0547406	2.50411	0.0122761	0.759205
ENSMUSG00000106491	Gm42446	TEC	5	predicted gene 42446		147.354	0.485688	0.144973	0.0526652	2.50254	0.0123305	0.760419
ENSMUSG00000032496	Ltf	protein_coding	9	lactotransferrin	LTF	26.3653	1.68845	0.047587	0.0210254	2.50074	0.0123933	0.762136
ENSMUSG00000007030	Vwa7	protein_coding	17	von Willebrand factor A domain containing 7	VWA7	1419.91	-0.201099	-0.133826	0.0548183	-2.49528	0.0125858	0.771802
ENSMUSG00000048385	Scrt1	protein_coding	15	scratch family zinc finger 1	SCRT1	10364.8	-0.135439	-0.110213	0.0447349	-2.49402	0.0126305	0.772374
ENSMUSG00000020548	1700086D15Rik	protein_coding	11	RIKEN cDNA 1700086D15 gene		51.5188	0.803906	0.10063	0.0388863	2.4908	0.0127456	0.772912
ENSMUSG00000031840	Rab3a	protein_coding	8	RAB3A, member RAS oncogene family	RAB3A	16828.8	-0.105829	-0.0943216	0.037562	-2.49103	0.0127372	0.772912
ENSMUSG00000055027	Smyd1	protein_coding	6	SET and MYND domain containing 1	SMYD1	305.189	-0.484409	-0.142665	0.0524551	-2.49248	0.0126854	0.772912
ENSMUSG00000059742	Kcnh7	protein_coding	2	potassium voltage-gated channel, subfamily H (eag-related), member 7	KCNH7	3124.67	0.150447	0.119513	0.0477767	2.48914	0.0128054	0.774388
ENSMUSG00000032294	Pkm	protein_coding	9	pyruvate kinase, muscle	PKM	70388	-0.0903042	-0.0828599	0.0331459	-2.48623	0.0129106	0.778596
ENSMUSG00000112847	Gm47573	TEC	10	predicted gene, 47573		46.3038	-0.779366	-0.092369	0.0393375	-2.48355	0.013008	0.782308
ENSMUSG00000009293	Ube2g2	protein_coding	10	ubiquitin-conjugating enzyme E2G 2	UBE2G2	1686.28	0.165782	0.124592	0.0504615	2.48188	0.0130692	0.783829
ENSMUSG00000074385	Gm10684	lincRNA	9	predicted gene 10684		215.292	-0.481918	-0.115713	0.0524575	-2.47846	0.0131952	0.789219
ENSMUSG00000103192	Gm37645	TEC	1	predicted gene, 37645		99.6407	0.586407	0.125162	0.047596	2.4771	0.0132455	0.79006
ENSMUSG00000093880	Tmem181c-ps	unprocessed_pseudogene	17	transmembrane protein 181C, pseudogene		235.614	0.609392	0.0919944	0.0463389	2.47495	0.0133253	0.790875
ENSMUSG00000104145	D130019J16Rik	TEC	1	RIKEN cDNA D130019J16 gene		218.35	0.384978	0.144129	0.0568546	2.47479	0.0133316	0.790875
ENSMUSG00000114153	Gm48692	TEC	12	predicted gene, 48692		143.1	0.634382	0.116646	0.0453019	2.47232	0.013424	0.794196
ENSMUSG00000006542	Prkag3	protein_coding	1	protein kinase, AMP-activated, gamma 3 non-catalytic subunit	PRKAG3	100.47	0.601738	0.119884	0.0467836	2.47103	0.0134723	0.794905
ENSMUSG00000038094	Atp13a4	protein_coding	16	ATPase type 13A4	ATP13A4	1665.9	-0.221738	-0.142729	0.0567343	-2.46738	0.0136104	0.800887
ENSMUSG00000021957	Tkt	protein_coding	14	transketolase	TKT	11376.7	-0.117149	-0.101567	0.0408164	-2.46628	0.0136523	0.800918
ENSMUSG00000025885	Myo5b	protein_coding	18	myosin VB	MYO5B	975.135	-0.191914	-0.130895	0.0541009	-2.46544	0.0136843	0.800918
ENSMUSG00000003379	Cd79a	protein_coding	7	CD79A antigen (immunoglobulin-associated alpha)	CD79A	22.9144	-1.73291	-0.0659011	0.0212533	-2.46387	0.0137447	0.802304
ENSMUSG00000038141	Tmem181a	protein_coding	17	transmembrane protein 181A	TMEM181	1429.9	-0.270436	-0.14419	0.0587151	-2.46169	0.0138285	0.805042
ENSMUSG00000001281	Itgb7	protein_coding	15	integrin beta 7	ITGB7	69.4954	-0.742707	-0.101796	0.0403349	-2.45722	0.0140015	0.806509
ENSMUSG00000016382	Pls3	protein_coding	X	plastin 3 (T-isoform)	PLS3	9571.75	-0.117219	-0.101346	0.0409192	-2.45913	0.0139275	0.806509
ENSMUSG00000037257	Aagab	protein_coding	9	alpha- and gamma-adaptin binding protein	AAGAB	2689.75	0.146917	0.116131	0.0474624	2.45813	0.0139663	0.806509
ENSMUSG00000039678	Tbc1d13	protein_coding	2	TBC1 domain family, member 13	TBC1D13	2556.54	0.14229	0.114385	0.0465637	2.45778	0.0139798	0.806509
ENSMUSG00000031626	Sorbs2	protein_coding	8	sorbin and SH3 domain containing 2	SORBS2	6503.07	0.123675	0.106045	0.0425429	2.45468	0.014101	0.810105
ENSMUSG00000023328	Ache	protein_coding	5	acetylcholinesterase	ACHE	8555.97	-0.116186	-0.100305	0.0407302	-2.45319	0.0141597	0.810952
ENSMUSG00000115975	Gm49526	TEC	15	predicted gene, 49526		96.8404	0.570588	0.130525	0.0481134	2.45242	0.0141901	0.810952
ENSMUSG00000020019	Ntn4	protein_coding	10	netrin 4	NTN4	473.074	-0.338093	-0.135505	0.058219	-2.45141	0.0142296	0.811087
ENSMUSG00000021282	Eif5	protein_coding	12	eukaryotic translation initiation factor 5	EIF5	15937.1	-0.113046	-0.0995434	0.0399855	-2.44831	0.0143527	0.813856
ENSMUSG00000106385	Gm42943	TEC	3	predicted gene 42943		65.8748	0.789134	0.0997878	0.0388517	2.44857	0.0143424	0.813856
ENSMUSG00000046447	Camk2n1	protein_coding	4	calcium/calmodulin-dependent protein kinase II inhibitor 1	CAMK2N1	17260.6	-0.152184	-0.118875	0.0485735	-2.4469	0.0144093	0.814945
ENSMUSG00000039828	Wdr70	protein_coding	15	WD repeat domain 70	WDR70	1295.77	-0.203765	-0.135775	0.0554566	-2.44587	0.0144501	0.815145
ENSMUSG00000001313	Rnd2	protein_coding	11	Rho family GTPase 2	RND2	11097.4	-0.135972	-0.114031	0.0454474	-2.4429	0.0145696	0.819768
ENSMUSG00000076612	Ighg2c	IG_C_gene	12	immunoglobulin heavy constant gamma 2C		23.0118	-1.16174	-0.0597089	0.0294503	-2.44137	0.0146316	0.821138
ENSMUSG00000050288	Fzd2	protein_coding	11	frizzled class receptor 2	FZD2	140.796	-0.49708	-0.127431	0.0512913	-2.43839	0.0147527	0.82581
ENSMUSG00000024589	Nedd4l	protein_coding	18	neural precursor cell expressed, developmentally down-regulated gene 4-like	NEDD4L	4193.98	0.126386	0.106711	0.0434136	2.43487	0.0148972	0.826617
ENSMUSG00000081978	Gm14895	processed_pseudogene	X	predicted gene 14895		31.6538	0.942596	0.0815896	0.0339234	2.43547	0.0148723	0.826617
ENSMUSG00000102874	Gm37137	TEC	9	predicted gene, 37137		72.9422	0.653995	0.114344	0.0440804	2.43435	0.0149186	0.826617
ENSMUSG00000115543	B230362B09Rik	TEC	15	RIKEN cDNA B230362B09 gene		94.4113	0.613961	0.11703	0.0458421	2.43451	0.0149119	0.826617
ENSMUSG00000008734	Gprc5b	protein_coding	7	G protein-coupled receptor, family C, group 5, member B	GPRC5B	24103.3	-0.106031	-0.0942638	0.038318	-2.43146	0.0150382	0.827213
ENSMUSG00000027259	Adal	protein_coding	2	adenosine deaminase-like	ADAL	1111.91	0.184127	0.135728	0.0534788	2.43243	0.014998	0.827213
ENSMUSG00000036353	P2ry12	protein_coding	3	purinergic receptor P2Y, G-protein coupled 12	P2RY12	1520.4	0.231041	0.138955	0.0575045	2.42861	0.0151567	0.827213
ENSMUSG00000048001	Hes5	protein_coding	4	hes family bHLH transcription factor 5	HES5	135.427	-0.477299	-0.122888	0.0521787	-2.4268	0.0152324	0.827213
ENSMUSG00000060548	Tnfrsf19	protein_coding	14	tumor necrosis factor receptor superfamily, member 19	TNFRSF19	2837.4	-0.135186	-0.110975	0.0454654	-2.42722	0.0152152	0.827213
ENSMUSG00000081824	Ndufs5-ps	processed_pseudogene	16	NADH:ubiquinone oxidoreductase core subunit S5, pseudogene		183.271	2.28264	0.0344775	0.0150112	2.42901	0.0151402	0.827213
ENSMUSG00000103697	Gm38020	TEC	X	predicted gene, 38020		625.43	0.31621	0.157614	0.0586322	2.4272	0.015216	0.827213
ENSMUSG00000105202	C230031I18Rik	TEC	3	RIKEN cDNA C230031I18 gene		192.384	0.454217	0.140366	0.0534769	2.43102	0.0150563	0.827213
ENSMUSG00000024925	Rnaseh2c	protein_coding	19	ribonuclease H2, subunit C	RNASEH2C	433.4	-0.271281	-0.140359	0.0587777	-2.42547	0.0152885	0.828195
ENSMUSG00000098526	Gm27366	misc_RNA	10	predicted gene, 27366		15.1017	1.43386	0.057959	0.0240685	2.4228	0.0154014	0.832249
ENSMUSG00000082908	Gm13736	processed_pseudogene	2	predicted gene 13736		26.6689	1.94785	0.0439755	0.0184516	2.4203	0.0155077	0.835922
ENSMUSG00000026511	Srp9	protein_coding	1	signal recognition particle 9	SRP9	2228.14	-0.165324	-0.126063	0.0511237	-2.41311	0.0158172	0.844565
ENSMUSG00000057880	Abat	protein_coding	16	4-aminobutyrate aminotransferase	ABAT	31513.4	-0.0941647	-0.0846233	0.0351285	-2.41382	0.0157862	0.844565
ENSMUSG00000072974	Gm4787	protein_coding	12	predicted gene 4787		151.231	0.458005	0.141813	0.053165	2.41302	0.0158208	0.844565
ENSMUSG00000102145	Gm38056	TEC	1	predicted gene, 38056		378.496	0.351479	0.149213	0.0576975	2.41298	0.0158228	0.844565
ENSMUSG00000022453	Naga	protein_coding	15	N-acetyl galactosaminidase, alpha	NAGA	1271.27	0.199747	0.1332	0.0553461	2.41018	0.0159449	0.844884
ENSMUSG00000047502	Mroh7	protein_coding	4	maestro heat-like repeat family member 7	MROH7	233.071	0.476203	0.126562	0.0521558	2.41083	0.0159162	0.844884
ENSMUSG00000097929	Tunar	protein_coding	12	Tcl1 upstream neural differentiation associated RNA	TUNAR	1373.08	-0.213019	-0.133324	0.0564691	-2.41075	0.0159195	0.844884
ENSMUSG00000052270	Fpr2	protein_coding	17	formyl peptide receptor 2	FPR2	34.5674	0.996611	0.0700389	0.0320212	2.4085	0.0160184	0.846725
ENSMUSG00000084399	Gm15666	transcribed_processed_pseudogene	10	predicted gene 15666		67.857	0.652275	0.111462	0.0438002	2.40195	0.0163078	0.858969
ENSMUSG00000096870	Gm21816	TEC	16	predicted gene, 21816		104.563	0.592916	0.112868	0.0463663	2.40148	0.0163287	0.858969
ENSMUSG00000025268	Maged2	protein_coding	X	melanoma antigen, family D, 2	MAGED2	3779.53	-0.14632	-0.118379	0.0481092	-2.39266	0.0167266	0.863958
ENSMUSG00000030351	Tspan11	protein_coding	6	tetraspanin 11	TSPAN11	43.095	1.14843	0.0642693	0.0281183	2.39421	0.0166562	0.863958
ENSMUSG00000043192	Gpi-ps	processed_pseudogene	8	glucose-6-phosphate isomerase, pseudogene		467.684	1.38463	0.0432707	0.0234663	2.39401	0.0166651	0.863958
ENSMUSG00000060012	Kif13b	protein_coding	14	kinesin family member 13B	KIF13B	12321.3	0.134521	0.107747	0.0457589	2.39063	0.0168193	0.863958
ENSMUSG00000070304	Scn2b	protein_coding	9	sodium channel, voltage-gated, type II, beta	SCN2B	7439.96	-0.133212	-0.10768	0.0454177	-2.39574	0.0165867	0.863958
ENSMUSG00000082315	Gm16523	transcribed_processed_pseudogene	2	predicted gene, 16523		93.4092	0.548022	0.120358	0.0484998	2.394	0.0166657	0.863958
ENSMUSG00000095690	Rab11b-ps2	processed_pseudogene	19	RAB11B, member RAS oncogene family, pseudogene 2		88.0985	-0.781179	-0.100253	0.0381796	-2.39126	0.0167907	0.863958
ENSMUSG00000102157	Gm37470	TEC	1	predicted gene, 37470		68.4119	0.651661	0.108756	0.0437322	2.39582	0.0165832	0.863958
ENSMUSG00000106446	Gm42970	TEC	3	predicted gene 42970		73.2249	0.657366	0.106266	0.0433752	2.39105	0.0168004	0.863958
ENSMUSG00000113065	Gm48870	TEC	13	predicted gene, 48870		160.223	0.492319	0.134247	0.0512608	2.39463	0.0166371	0.863958
ENSMUSG00000021477	Ctsl	protein_coding	13	cathepsin L	CTSV	4896.4	0.151878	0.114474	0.049207	2.38516	0.0170716	0.874859
ENSMUSG00000020734	Grin2c	protein_coding	11	glutamate receptor, ionotropic, NMDA2C (epsilon 3)	GRIN2C	1140.24	-0.211946	-0.129458	0.0565708	-2.38305	0.01717	0.875914
ENSMUSG00000022303	Dcstamp	protein_coding	15	dendrocyte expressed seven transmembrane protein	DCSTAMP	21.5189	1.24826	0.0617502	0.0266593	2.383	0.0171724	0.875914
ENSMUSG00000024767	Otub1	protein_coding	19	OTU domain, ubiquitin aldehyde binding 1	OTUB1	7341.6	-0.11107	-0.0970361	0.0403555	-2.37532	0.0175337	0.888118
ENSMUSG00000037681	Esyt3	protein_coding	9	extended synaptotagmin-like protein 3	ESYT3	349.154	-0.361773	-0.136032	0.0571014	-2.3759	0.0175061	0.888118
ENSMUSG00000105568	Gm42971	TEC	3	predicted gene 42971		131.39	0.507951	0.130777	0.0502916	2.37573	0.0175142	0.888118
ENSMUSG00000108940	Gm45719	TEC	7	predicted gene 45719		77.8152	0.593179	0.120855	0.0461986	2.37371	0.0176105	0.889944
ENSMUSG00000059895	Ptp4a3	protein_coding	15	protein tyrosine phosphatase 4a3	PTP4A3	989.19	-0.188561	-0.12681	0.0545519	-2.37057	0.0177606	0.895453
ENSMUSG00000001175	Calm1	protein_coding	12	calmodulin 1	CALM1	113373	-0.0970249	-0.087	0.0365328	-2.36707	0.0179295	0.895696
ENSMUSG00000007440	Pcdha11	protein_coding	18	protocadherin alpha 11	PCDHA11	358.233	0.368267	0.143671	0.0568423	2.36766	0.0179012	0.895696
ENSMUSG00000034674	Tdg	protein_coding	10	thymine DNA glycosylase	TDG	628.692	0.348443	0.123521	0.0575718	2.36872	0.0178499	0.895696
ENSMUSG00000106978	N4bp2os	processed_transcript	5	NEDD4 binding protein 2, opposite strand		141.542	0.462596	0.120932	0.0524738	2.3684	0.0178652	0.895696
ENSMUSG00000023262	Acy1	protein_coding	9	aminoacylase 1	ACY1	1095.72	-0.256549	-0.138495	0.0586577	-2.36425	0.0180665	0.896048
ENSMUSG00000029636	Wasf3	protein_coding	5	WAS protein family, member 3	WASF3	8926.38	-0.105415	-0.091624	0.0390033	-2.36104	0.0182239	0.896048
ENSMUSG00000030682	Cdipt	protein_coding	7	CDP-diacylglycerol--inositol 3-phosphatidyltransferase (phosphatidylinositol synthase)	CDIPT	3265.95	0.121673	0.101535	0.0431516	2.36501	0.0180295	0.896048
ENSMUSG00000030789	Itgax	protein_coding	7	integrin alpha X	ITGAX	805.006	0.30875	0.138967	0.0586078	2.36183	0.0181848	0.896048
ENSMUSG00000035530	Eif1	protein_coding	11	eukaryotic translation initiation factor 1	EIF1	11093.5	-0.11919	-0.101883	0.0425781	-2.36311	0.0181222	0.896048
ENSMUSG00000036835	Psenen	protein_coding	7	presenilin enhancer gamma secretase subunit	PSENEN	1176.62	-0.215564	-0.142437	0.0569659	-2.36113	0.0182191	0.896048
ENSMUSG00000113649	Gm47665	TEC	13	predicted gene, 47665		76.5654	0.742707	0.0950571	0.039453	2.36246	0.0181541	0.896048
ENSMUSG00000048988	Elfn1	protein_coding	5	leucine rich repeat and fibronectin type III, extracellular 1	ELFN1	1576.85	-0.16177	-0.117637	0.0511571	-2.35777	0.0183852	0.901951
ENSMUSG00000038412	Higd1a	protein_coding	9	HIG1 domain family, member 1A	HIGD1A	2134.36	-0.16057	-0.12141	0.0509823	-2.35681	0.0184326	0.902246
ENSMUSG00000023921	Mmut	protein_coding	17	methylmalonyl-Coenzyme A mutase	MMUT	3438.23	-0.133419	-0.108554	0.045959	-2.35466	0.0185394	0.903343
ENSMUSG00000030990	Pgap2	protein_coding	7	post-GPI attachment to proteins 2	PGAP2	809.75	0.231239	0.132914	0.0578638	2.35387	0.0185791	0.903343
ENSMUSG00000032470	Mras	protein_coding	9	muscle and microspikes RAS	MRAS	5462.17	0.115991	0.0986571	0.0418732	2.35524	0.0185108	0.903343
ENSMUSG00000023909	Paqr4	protein_coding	17	progestin and adipoQ receptor family member IV	PAQR4	6004.09	-0.1274	-0.104865	0.0446801	-2.35043	0.0187517	0.909708
ENSMUSG00000107148	Gm42888	TEC	5	predicted gene 42888		158.442	0.503085	0.126498	0.050165	2.34545	0.0190039	0.919898
ENSMUSG00000006057	Atp5g1	protein_coding	11	ATP synthase, H+ transporting, mitochondrial F0 complex, subunit C1 (subunit 9)	ATP5MC1	5407.88	-0.106647	-0.0935662	0.0397638	-2.32726	0.0199517	0.925494
ENSMUSG00000020182	Ddc	protein_coding	11	dopa decarboxylase	DDC	494.577	-0.336306	-0.136712	0.0577744	-2.33126	0.0197396	0.925494
ENSMUSG00000022098	Bmp1	protein_coding	14	bone morphogenetic protein 1	BMP1	1374.29	0.167515	0.122365	0.0523075	2.32866	0.019877	0.925494
ENSMUSG00000024163	Mapk8ip3	protein_coding	17	mitogen-activated protein kinase 8 interacting protein 3	MAPK8IP3	29241.8	-0.0896166	-0.0807925	0.0346609	-2.33584	0.0194996	0.925494
ENSMUSG00000028195	Ccn1	protein_coding	3	cellular communication network factor 1	CCN1	451.205	-0.274556	-0.144308	0.0588771	-2.32482	0.0200817	0.925494
ENSMUSG00000028756	Pink1	protein_coding	4	PTEN induced putative kinase 1	PINK1	23087.7	-0.125817	-0.105407	0.0447105	-2.31882	0.0204049	0.925494
ENSMUSG00000031812	Map1lc3b	protein_coding	8	microtubule-associated protein 1 light chain 3 beta	MAP1LC3B	11530.2	-0.103612	-0.0913628	0.0390563	-2.31646	0.0205334	0.925494
ENSMUSG00000032977	Fam207a	protein_coding	10	family with sequence similarity 207, member A	FAM207A	1149.15	0.183003	0.124619	0.0542645	2.33142	0.0197312	0.925494
ENSMUSG00000034602	Mon2	protein_coding	10	MON2 homolog, regulator of endosome to Golgi trafficking	MON2	9366.59	-0.173981	-0.119679	0.0532928	-2.31971	0.0203568	0.925494
ENSMUSG00000037686	Aspg	protein_coding	12	asparaginase	ASPG	515.201	0.346512	0.131848	0.0573895	2.32086	0.0202944	0.925494
ENSMUSG00000038241	Cep250	protein_coding	2	centrosomal protein 250	CEP250	2622.59	0.173454	0.123527	0.0531407	2.32743	0.0199423	0.925494
ENSMUSG00000038290	Smg6	protein_coding	11	Smg-6 homolog, nonsense mediated mRNA decay factor (C. elegans)	SMG6	4900.98	0.133193	0.108197	0.0463153	2.32121	0.0202755	0.925494
ENSMUSG00000038886	Man2a2	protein_coding	7	mannosidase 2, alpha 2	MAN2A2	13619.4	0.1212	0.103852	0.0436373	2.31746	0.0204785	0.925494
ENSMUSG00000039601	Rcan2	protein_coding	17	regulator of calcineurin 2	RCAN2	17945.1	-0.13803	-0.108937	0.0473927	-2.31595	0.0205609	0.925494
ENSMUSG00000040612	Ildr2	protein_coding	1	immunoglobulin-like domain containing receptor 2	ILDR2	3367.36	-0.135225	-0.107399	0.0467626	-2.32013	0.0203339	0.925494
ENSMUSG00000040752	Myh6	protein_coding	14	myosin, heavy polypeptide 6, cardiac muscle, alpha	MYH6	33.9534	1.24826	0.0452113	0.0254938	2.32284	0.0201878	0.925494
ENSMUSG00000058297	Spock2	protein_coding	10	sparc/osteonectin, cwcv and kazal-like domains proteoglycan 2	SPOCK2	55659.1	-0.111421	-0.0950927	0.0410462	-2.32741	0.0199433	0.925494
ENSMUSG00000062785	Kcnc3	protein_coding	7	potassium voltage gated channel, Shaw-related subfamily, member 3	KCNC3	31946.3	-0.158449	-0.11738	0.0509701	-2.32687	0.0199723	0.925494
ENSMUSG00000074758	Gm5535	lincRNA	2	predicted gene 5535		336.68	0.397625	0.139794	0.0553777	2.34189	0.0191865	0.925494
ENSMUSG00000084370	Gm15442	processed_pseudogene	3	predicted gene 15442		9.21339	2.12928	0.0319797	0.0163588	2.31659	0.0205262	0.925494
ENSMUSG00000085238	4930479D17Rik	lincRNA	6	RIKEN cDNA 4930479D17 gene		13.9899	-1.38967	-0.0507228	0.0232347	-2.3379	0.0193926	0.925494
ENSMUSG00000090125	Pou3f1	protein_coding	4	POU domain, class 3, transcription factor 1	POU3F1	556.229	-0.270081	-0.142151	0.0588668	-2.32535	0.0200534	0.925494
ENSMUSG00000102417	Gm36939	TEC	16	predicted gene, 36939		82.1716	0.599693	0.115755	0.0453814	2.33439	0.0195754	0.925494
ENSMUSG00000102581	Gm37443	TEC	3	predicted gene, 37443		203.178	0.405031	0.136163	0.0548652	2.31888	0.0204015	0.925494
ENSMUSG00000105322	Gm43751	TEC	3	predicted gene 43751		273.528	0.360639	0.142194	0.0568687	2.32172	0.0202479	0.925494
ENSMUSG00000107476	Zfp862-ps	transcribed_unitary_pseudogene	6	zinc finger protein 862, pseudogene		1033.88	0.24602	0.136604	0.0585081	2.32429	0.0201101	0.925494
ENSMUSG00000108146	Gm43889	TEC	6	predicted gene, 43889		336.922	0.363415	0.146606	0.0568703	2.33854	0.0193591	0.925494
ENSMUSG00000111212	Gm47087	TEC	9	predicted gene, 47087		192.344	0.483133	0.126196	0.0510848	2.3387	0.019351	0.925494
ENSMUSG00000112571	Gm48207	TEC	10	predicted gene, 48207		33.8802	0.948182	0.0753326	0.0323421	2.31692	0.0205079	0.925494
ENSMUSG00000112900	Gm48204	TEC	10	predicted gene, 48204		26.9069	0.960642	0.0752711	0.03216	2.31958	0.0203635	0.925494
ENSMUSG00000115632	Gm17922	processed_pseudogene	14	predicted gene, 17922		117.858	0.56128	0.117865	0.0469962	2.3243	0.0201095	0.925494
ENSMUSG00000116753	Gm36001	lincRNA	16	predicted gene, 36001		21.5796	-1.19981	-0.0636528	0.0263196	-2.33862	0.0193549	0.925494
ENSMUSG00000116793	Gm34256	lincRNA	16	predicted gene, 34256		177.895	0.655322	0.0976906	0.0424683	2.32686	0.0199727	0.925494
ENSMUSG00000117381	Gm10350	processed_pseudogene	18	predicted gene 10350		22.0539	-1.39968	-0.0396498	0.022966	-2.32782	0.0199218	0.925494
ENSMUSG00000002032	Tmem25	protein_coding	9	transmembrane protein 25	TMEM25	2634.72	-0.156726	-0.114172	0.0509084	-2.30689	0.0210609	0.92612
ENSMUSG00000019102	Aldh3a1	protein_coding	11	aldehyde dehydrogenase family 3, subfamily A1	ALDH3A1	49.768	0.947553	0.0783735	0.0320871	2.30761	0.0210208	0.92612
ENSMUSG00000020483	Dynll2	protein_coding	11	dynein light chain LC8-type 2	DYNLL2	34585.6	-0.0890497	-0.0808957	0.0348375	-2.30648	0.0210839	0.92612
ENSMUSG00000020538	Srebf1	protein_coding	11	sterol regulatory element binding transcription factor 1	SREBF1	7081.01	-0.143762	-0.114554	0.0486067	-2.30869	0.020961	0.92612
ENSMUSG00000029757	Dync1i1	protein_coding	6	dynein cytoplasmic 1 intermediate chain 1	DYNC1I1	7661.94	-0.102969	-0.0904152	0.0389559	-2.31001	0.0208877	0.92612
ENSMUSG00000036570	Fxyd1	protein_coding	7	FXYD domain-containing ion transport regulator 1	FXYD1	1852.83	-0.2411	-0.129894	0.0584062	-2.31408	0.0206635	0.92612
ENSMUSG00000041608	Entpd3	protein_coding	9	ectonucleoside triphosphate diphosphohydrolase 3	ENTPD3	2347.81	0.179049	0.125746	0.0540196	2.3087	0.0209604	0.92612
ENSMUSG00000071178	Serpina1b	protein_coding	12	serine (or cysteine) preptidase inhibitor, clade A, member 1B	SERPINA1	6.47393	2.64703	0.0272519	0.0141444	2.31308	0.0207182	0.92612
ENSMUSG00000073530	Pappa2	protein_coding	1	pappalysin 2	PAPPA2	104.572	0.681941	0.0940387	0.0411662	2.30676	0.021068	0.92612
ENSMUSG00000075705	Msrb1	protein_coding	17	methionine sulfoxide reductase B1	MSRB1	1647.79	-0.177976	-0.12635	0.0538499	-2.31386	0.0206755	0.92612
ENSMUSG00000098973	Mir6236	miRNA	9	microRNA 6236		124.848	-3.37612	-0.0131936	0.00964027	-2.30824	0.0209856	0.92612
ENSMUSG00000101778	Gm29488	sense_intronic	1	predicted gene 29488		124.146	0.483179	0.128323	0.0508659	2.31195	0.0207802	0.92612
ENSMUSG00000020122	Egfr	protein_coding	11	epidermal growth factor receptor	EGFR	1516.46	0.149501	0.113868	0.0497391	2.30066	0.021411	0.93284
ENSMUSG00000022199	Slc22a17	protein_coding	14	solute carrier family 22 (organic cation transporter), member 17	SLC22A17	23290.6	-0.109649	-0.0943757	0.0408925	-2.3024	0.0213124	0.93284
ENSMUSG00000038244	Mical2	protein_coding	7	microtubule associated monooxygenase, calponin and LIM domain containing 2	MICAL2	3595.27	-0.182879	-0.120716	0.0545545	-2.29921	0.0214932	0.93284
ENSMUSG00000089941	Gm16168	antisense	17	predicted gene 16168		162.191	0.454162	0.110159	0.0522076	2.29972	0.0214643	0.93284
ENSMUSG00000105050	Gm42482	TEC	5	predicted gene 42482		87.523	0.548574	0.124445	0.0474912	2.29948	0.0214779	0.93284
ENSMUSG00000105771	2900064K03Rik	TEC	5	RIKEN cDNA 2900064K03 gene		174.597	0.434646	0.13262	0.0532566	2.30172	0.021351	0.93284
ENSMUSG00000020181	Nav3	protein_coding	10	neuron navigator 3	NAV3	4091.03	0.114997	0.0989855	0.0423443	2.29779	0.0215738	0.934477
ENSMUSG00000037325	Bbs7	protein_coding	3	Bardet-Biedl syndrome 7 (human)	BBS7	883.841	-0.203983	-0.125687	0.0565569	-2.29542	0.0217089	0.938468
ENSMUSG00000083061	Gm12191	processed_pseudogene	11	predicted gene 12191		42.4145	1.07187	0.0750038	0.0292851	2.29346	0.0218218	0.941484
ENSMUSG00000010663	Fads1	protein_coding	19	fatty acid desaturase 1	FADS1	13667.3	-0.0973967	-0.0869281	0.0375798	-2.29113	0.021956	0.942218
ENSMUSG00000022253	Nadk2	protein_coding	15	NAD kinase 2, mitochondrial	NADK2	4674.1	-0.14748	-0.116718	0.0495052	-2.29092	0.0219683	0.942218
ENSMUSG00000071064	Zfp827	protein_coding	8	zinc finger protein 827	ZNF827	4172.33	-0.119268	-0.0997041	0.0434877	-2.29229	0.021889	0.942218
ENSMUSG00000086922	Gm13835	processed_pseudogene	6	predicted gene 13835		238.838	0.337943	0.121127	0.0575575	2.29005	0.0220182	0.942506
ENSMUSG00000041028	Ghitm	protein_coding	14	growth hormone inducible transmembrane protein	GHITM	25516	-0.0988886	-0.0876974	0.0380619	-2.28778	0.0221502	0.942615
ENSMUSG00000073079	Srp54a	protein_coding	12	signal recognition particle 54A	SRP54	199.751	-0.454987	-0.113062	0.0519133	-2.28868	0.0220978	0.942615
ENSMUSG00000109139	Gm44798	TEC	8	predicted gene 44798		152.158	0.484459	0.128703	0.0505646	2.28819	0.0221264	0.942615
ENSMUSG00000004360	9330159F19Rik	protein_coding	10	RIKEN cDNA 9330159F19 gene	KIAA0408	4114.05	0.152487	0.116479	0.0504642	2.28344	0.0224047	0.943591
ENSMUSG00000008035	Mid1ip1	protein_coding	X	Mid1 interacting protein 1 (gastrulation specific G12-like (zebrafish))	MID1IP1	8057.72	-0.117602	-0.101101	0.0432241	-2.28077	0.0225621	0.943591
ENSMUSG00000026579	F5	protein_coding	1	coagulation factor V	F5	122.034	-0.514217	-0.110601	0.0486982	-2.28126	0.0225332	0.943591
ENSMUSG00000032281	Acsbg1	protein_coding	9	acyl-CoA synthetase bubblegum family member 1	ACSBG1	12994.3	-0.108532	-0.0933976	0.0408644	-2.28113	0.0225409	0.943591
ENSMUSG00000104017	Gm37363	TEC	1	predicted gene, 37363		110.756	0.54986	0.114941	0.0471021	2.28371	0.0223884	0.943591
ENSMUSG00000106106	CT010467.1	rRNA	17	18s RNA, related sequence 5		21250.2	-1.36068	-0.0545088	0.0227824	-2.28234	0.022469	0.943591
ENSMUSG00000108880	Gm44560	TEC	7	predicted gene 44560		812.66	0.285571	0.143838	0.0587959	2.28101	0.0225477	0.943591
ENSMUSG00000111465	Gm47113	lincRNA	9	predicted gene, 47113		109.848	-1.36946	-0.0437941	0.0227264	-2.28483	0.022323	0.943591
ENSMUSG00000113055	Gm48700	TEC	12	predicted gene, 48700		86.5523	0.585074	0.118245	0.0455532	2.28603	0.0222524	0.943591
ENSMUSG00000019971	Cep290	protein_coding	10	centrosomal protein 290	CEP290	3384.69	0.135245	0.109307	0.047296	2.27653	0.0228142	0.948402
ENSMUSG00000024942	Capn1	protein_coding	19	calpain 1	CAPN1	2713.48	-0.128868	-0.1041	0.0459261	-2.27692	0.022791	0.948402
ENSMUSG00000025784	Clec3b	protein_coding	9	C-type lectin domain family 3, member b	CLEC3B	228.088	-1.21203	-0.0533635	0.0252494	-2.2742	0.0229542	0.948402
ENSMUSG00000033488	Cryzl2	protein_coding	1	crystallin zeta like 2	CRYZL2P	851.498	-0.324757	-0.117201	0.0578892	-2.2744	0.0229421	0.948402
ENSMUSG00000033781	Asb13	protein_coding	13	ankyrin repeat and SOCS box-containing 13	ASB13	4259.31	-0.159979	-0.119567	0.0517402	-2.27807	0.0227225	0.948402
ENSMUSG00000090671	Gm5067	processed_pseudogene	5	predicted gene 5067		952.894	0.259972	0.141907	0.05884	2.27482	0.0229166	0.948402
ENSMUSG00000111761	9230112J17Rik	lincRNA	9	RIKEN cDNA 9230112J17 gene		55.5228	-0.685642	-0.0712236	0.040547	-2.27375	0.0229813	0.948402
ENSMUSG00000024501	Dpysl3	protein_coding	18	dihydropyrimidinase-like 3	DPYSL3	8026.12	0.0996013	0.0878367	0.038467	2.27214	0.0230779	0.949787
ENSMUSG00000050328	Hoxc12	protein_coding	15	homeobox C12	HOXC12	26.8418	4.86538	0.00857594	0.00699555	2.27175	0.0231019	0.949787
ENSMUSG00000014846	Tppp3	protein_coding	8	tubulin polymerization-promoting protein family member 3	TPPP3	9436.98	-0.130692	-0.107606	0.0464402	-2.26804	0.0233269	0.952346
ENSMUSG00000024600	Slc27a6	protein_coding	18	solute carrier family 27 (fatty acid transporter), member 6	SLC27A6	55.4873	-0.858107	-0.0776997	0.0339219	-2.26713	0.023382	0.952346
ENSMUSG00000029298	Gbp9	protein_coding	5	guanylate-binding protein 9	GBP6	203.013	-0.416261	-0.130274	0.0537349	-2.2657	0.0234695	0.952346
ENSMUSG00000032484	Ngp	protein_coding	9	neutrophilic granule protein		26.4831	1.50769	0.046273	0.0212634	2.26922	0.0232548	0.952346
ENSMUSG00000044216	Kcnj4	protein_coding	15	potassium inwardly-rectifying channel, subfamily J, member 4	KCNJ4	35.8446	-1.1173	-0.0702813	0.0271974	-2.2662	0.0234393	0.952346
ENSMUSG00000076281	Gm24270	miRNA	9	predicted gene, 24270		42.1799	-3.89414	-0.0101814	0.00828151	-2.26664	0.0234122	0.952346
ENSMUSG00000076435	Acsf2	protein_coding	11	acyl-CoA synthetase family member 2	ACSF2	2395.64	-0.164572	-0.121288	0.052531	-2.26782	0.02334	0.952346
ENSMUSG00000015852	Fcrls	protein_coding	3	Fc receptor-like S, scavenger receptor		972.963	0.655748	0.107618	0.0414989	2.25963	0.0238444	0.957557
ENSMUSG00000026385	Dbi	protein_coding	1	diazepam binding inhibitor	DBI	6255.72	0.134874	0.103992	0.0474497	2.25807	0.0239413	0.957557
ENSMUSG00000037418	Best1	protein_coding	19	bestrophin 1	BEST1	89.7614	0.531137	0.100395	0.0477654	2.25922	0.0238695	0.957557
ENSMUSG00000038155	Gstp2	protein_coding	19	glutathione S-transferase, pi 2	GSTP1	135.735	1.50281	0.0411072	0.020763	2.26205	0.0236942	0.957557
ENSMUSG00000039105	Atp6v1g1	protein_coding	4	ATPase, H+ transporting, lysosomal V1 subunit G1	ATP6V1G1	3497.32	0.169273	0.116436	0.0532273	2.2628	0.0236478	0.957557
ENSMUSG00000076615	Ighg3	IG_C_gene	12	Immunoglobulin heavy constant gamma 3		27.7773	-0.97804	-0.0571813	0.0308551	-2.26012	0.0238136	0.957557
ENSMUSG00000094685	Gm5900	processed_pseudogene	7	predicted pseudogene 5900		52.7241	-0.838154	-0.078239	0.0345271	-2.25795	0.0239488	0.957557
ENSMUSG00000102721	A630081D01Rik	TEC	1	RIKEN cDNA A630081D01 gene		123.451	0.493949	0.111685	0.0496472	2.25869	0.0239028	0.957557
ENSMUSG00000118280	Gm41804	lincRNA	19	predicted gene, 41804		36.6899	-1.03751	-0.0609287	0.0288564	-2.25692	0.0240134	0.958383
ENSMUSG00000088609	Gm24187	miRNA	13	predicted gene, 24187		12.6202	-1.70404	-0.0463991	0.0186856	-2.2552	0.0241209	0.96092
ENSMUSG00000034472	Rasd2	protein_coding	8	RASD family, member 2	RASD2	1573.98	-0.19914	-0.126086	0.0564899	-2.25105	0.0243825	0.969416
ENSMUSG00000110080	Gm6145	processed_transcript	14	predicted gene 6145		995.609	-0.211953	-0.126729	0.0573844	-2.25041	0.024423	0.969416
ENSMUSG00000021098	4930447C04Rik	protein_coding	12	RIKEN cDNA 4930447C04 gene	C14orf39	325.334	0.317778	0.129682	0.0580035	2.24661	0.0246652	0.971958
ENSMUSG00000037894	H2az1	protein_coding	3	H2A.Z variant histone 1	H2AZ1	2806.39	-0.129309	-0.105613	0.0464065	-2.24664	0.0246631	0.971958
ENSMUSG00000079610	Ankrd39	protein_coding	1	ankyrin repeat domain 39	ANKRD39	516.831	0.225818	0.125247	0.0580818	2.24713	0.0246319	0.971958
ENSMUSG00000103038	Gm37124	TEC	1	predicted gene, 37124		116.234	0.464189	0.121579	0.0511426	2.2475	0.0246084	0.971958
ENSMUSG00000031400	G6pdx	protein_coding	X	glucose-6-phosphate dehydrogenase X-linked	G6PD	3918.32	-0.145091	-0.113613	0.0496536	-2.24129	0.0250075	0.983675
ENSMUSG00000025316	Banp	protein_coding	8	BTG3 associated nuclear protein	BANP	850.927	0.190526	0.133433	0.0558348	2.23691	0.0252922	0.983971
ENSMUSG00000026675	Hsd17b7	protein_coding	1	hydroxysteroid (17-beta) dehydrogenase 7	HSD17B7	2275.01	0.162925	0.111685	0.0526131	2.23618	0.0253401	0.983971
ENSMUSG00000029772	Ahcyl2	protein_coding	6	S-adenosylhomocysteine hydrolase-like 2	AHCYL2	16641.9	-0.108744	-0.0922981	0.041496	-2.23694	0.0252905	0.983971
ENSMUSG00000040767	Snrnp25	protein_coding	11	small nuclear ribonucleoprotein 25 (U11/U12)	SNRNP25	416.399	-0.25072	-0.130951	0.0587839	-2.2375	0.0252538	0.983971
ENSMUSG00000051111	Sv2c	protein_coding	13	synaptic vesicle glycoprotein 2c	SV2C	31934.9	-0.138316	-0.106263	0.048419	-2.23649	0.0253198	0.983971
ENSMUSG00000070462	Tlnrd1	protein_coding	7	talin rod domain containing 1	TLNRD1	990.676	-0.186787	-0.127113	0.0555143	-2.2351	0.025411	0.983971
ENSMUSG00000079507	H2-Q1	protein_coding	17	histocompatibility 2, Q region locus 1	HLA-A	18.8623	-1.54941	-0.0383893	0.0201502	-2.23964	0.0251141	0.983971
ENSMUSG00000097177	9330159M07Rik	processed_transcript	9	RIKEN cDNA 9330159M07 gene		375.476	0.295034	0.138356	0.0585517	2.23495	0.0254207	0.983971
ENSMUSG00000114617	Gm48766	TEC	13	predicted gene, 48766		60.5961	0.629313	0.105784	0.0428355	2.23868	0.0251764	0.983971
ENSMUSG00000103779	Gm36931	TEC	17	predicted gene, 36931		55.2705	0.689979	0.0882687	0.0399884	2.23221	0.0256013	0.989208
ENSMUSG00000030428	Ttyh1	protein_coding	7	tweety family member 1	TTYH1	25482.8	-0.117292	-0.0977631	0.0438259	-2.22843	0.0258519	0.993614
ENSMUSG00000091931	Gon7	protein_coding	12	GON7 subunit of KEOPS complex	GON7	251.737	0.370402	0.120694	0.0557826	2.2295	0.0257805	0.993614
ENSMUSG00000111110	Gm36855	lincRNA	9	predicted gene, 36855		333.195	0.374589	0.0806211	0.0556374	2.22864	0.0258376	0.993614
ENSMUSG00000036594	H2-Aa	protein_coding	17	histocompatibility 2, class II antigen A, alpha	HLA-DQA1	171.991	-0.568297	-0.105256	0.0452165	-2.22672	0.0259661	0.996248
ENSMUSG00000000001	Gnai3	protein_coding	3	guanine nucleotide binding protein (G protein), alpha inhibiting 3	GNAI3	2505.72	-0.00582871	-0.00689487	0.0504995	-0.0871689	0.930537	0.999631
ENSMUSG00000000028	Cdc45	protein_coding	16	cell division cycle 45	CDC45	119.495	0.206379	0.051323	0.051578	1.02159	0.306975	0.999631
ENSMUSG00000000031	H19	lincRNA	7	H19, imprinted maternally expressed transcript		25.4006	0.647668	0.037113	0.028505	1.37243	0.169928	0.999631
ENSMUSG00000000037	Scml2	protein_coding	X	Scm polycomb group protein like 2	SCML2	46.3343	0.0986528	0.0102369	0.0385536	0.306989	0.758852	0.999631
ENSMUSG00000000049	Apoh	protein_coding	11	apolipoprotein H	APOH	27.0648	-0.0949111	-0.0110528	0.0321305	-0.235094	0.814136	0.999631
ENSMUSG00000000056	Narf	protein_coding	11	nuclear prelamin A recognition factor	NARF	2516.74	-0.00204808	-0.00261841	0.0485509	-0.0329525	0.973712	0.999631
ENSMUSG00000000058	Cav2	protein_coding	6	caveolin 2	CAV2	1583.7	0.0268046	0.00805155	0.058639	0.24792	0.804196	0.999631
ENSMUSG00000000078	Klf6	protein_coding	13	Kruppel-like factor 6	KLF6	2263.83	-0.00119347	-0.00306971	0.0523804	-0.0165484	0.986797	0.999631
ENSMUSG00000000085	Scmh1	protein_coding	4	sex comb on midleg homolog 1	SCMH1	1720.45	0.000271942	0.00185014	0.0495504	0.00421613	0.996636	0.999631
ENSMUSG00000000088	Cox5a	protein_coding	9	cytochrome c oxidase subunit 5A	COX5A	6804.74	-0.0808957	-0.0707487	0.0407554	-1.70657	0.087902	0.999631
ENSMUSG00000000093	Tbx2	protein_coding	11	T-box 2	TBX2	35.5348	-0.108098	-0.00968799	0.0357133	-0.30513	0.760267	0.999631
ENSMUSG00000000094	Tbx4	protein_coding	11	T-box 4	TBX4	12.6681	0.377707	0.0176924	0.0224956	0.616376	0.537646	0.999631
ENSMUSG00000000120	Ngfr	protein_coding	11	nerve growth factor receptor (TNFR superfamily, member 16)	NGFR	289.14	0.0955254	0.030041	0.0564385	0.599352	0.548938	0.999631
ENSMUSG00000000125	Wnt3	protein_coding	11	wingless-type MMTV integration site family, member 3	WNT3	618.326	-0.0385392	-0.0196231	0.0588638	-0.33238	0.739602	0.999631
ENSMUSG00000000126	Wnt9a	protein_coding	11	wingless-type MMTV integration site family, member 9A	WNT9A	107.512	-0.0389951	-0.00616842	0.049573	-0.178847	0.858058	0.999631
ENSMUSG00000000127	Fer	protein_coding	17	fer (fms/fps related) protein kinase	FER	1766.09	0.033685	0.0248211	0.0520319	0.473846	0.63561	0.999631
ENSMUSG00000000131	Xpo6	protein_coding	7	exportin 6	XPO6	5863.16	-0.0228215	-0.0193744	0.0432764	-0.441791	0.65864	0.999631
ENSMUSG00000000134	Tfe3	protein_coding	X	transcription factor E3	TFE3	1965.49	0.0675354	0.0519905	0.0496322	1.04379	0.296581	0.999631
ENSMUSG00000000142	Axin2	protein_coding	11	axin 2	AXIN2	1078.82	0.00979409	0.00748525	0.0542247	0.12507	0.900468	0.999631
ENSMUSG00000000148	Brat1	protein_coding	5	BRCA1-associated ATM activator 1	BRAT1	1050.99	0.0459911	0.0325463	0.0534053	0.60984	0.541968	0.999631
ENSMUSG00000000149	Gna12	protein_coding	5	guanine nucleotide binding protein, alpha 12	GNA12	13700.3	0.00607177	0.00164507	0.0505158	0.0907579	0.927685	0.999631
ENSMUSG00000000154	Slc22a18	protein_coding	7	solute carrier family 22 (organic cation transporter), member 18	SLC22A18	120.252	-0.103684	-0.0266636	0.05254	-0.535568	0.592257	0.999631
ENSMUSG00000000159	Igsf5	protein_coding	16	immunoglobulin superfamily, member 5	IGSF5	11.9133	-0.329569	-0.0110362	0.0214078	-0.517056	0.605117	0.999631
ENSMUSG00000000167	Pih1d2	protein_coding	9	PIH1 domain containing 2	PIH1D2	102.041	0.229636	0.0467292	0.0496657	1.05393	0.291916	0.999631
ENSMUSG00000000168	Dlat	protein_coding	9	dihydrolipoamide S-acetyltransferase (E2 component of pyruvate dehydrogenase complex)	DLAT	5895.97	0.0112129	0.00861635	0.0457835	0.1991	0.842185	0.999631
ENSMUSG00000000171	Sdhd	protein_coding	9	succinate dehydrogenase complex, subunit D, integral membrane protein	SDHD	3150.92	-0.0562728	-0.0464498	0.0459285	-0.994155	0.320147	0.999631
ENSMUSG00000000182	Fgf23	protein_coding	6	fibroblast growth factor 23	FGF23	10.8418	-0.343957	-0.00920642	0.0207647	-0.521956	0.601701	0.999631
ENSMUSG00000000184	Ccnd2	protein_coding	6	cyclin D2	CCND2	3278.51	-0.222957	-0.0756454	0.0552784	-1.30925	0.190451	0.999631
ENSMUSG00000000194	Gpr107	protein_coding	2	G protein-coupled receptor 107	GPR107	3586.08	0.0925671	0.0777083	0.0435132	1.77727	0.0755231	0.999631
ENSMUSG00000000197	Nalcn	protein_coding	14	sodium leak channel, non-selective	NALCN	8913.69	0.00407775	0.00336459	0.0413335	0.0843449	0.932782	0.999631
ENSMUSG00000000202	Btbd17	protein_coding	11	BTB (POZ) domain containing 17	BTBD17	730.223	-0.0159747	-0.00929184	0.055826	-0.187786	0.851045	0.999631
ENSMUSG00000000214	Th	protein_coding	7	tyrosine hydroxylase	TH	133.664	0.0521144	0.00821567	0.0424693	0.185757	0.852636	0.999631
ENSMUSG00000000223	Drp2	protein_coding	X	dystrophin related protein 2	DRP2	3977.71	-0.00571863	-0.00394823	0.0425534	-0.113465	0.909662	0.999631
ENSMUSG00000000244	Tspan32	protein_coding	7	tetraspanin 32	TSPAN32	33.688	-0.443429	-0.0284174	0.0316122	-1.07183	0.283795	0.999631
ENSMUSG00000000247	Lhx2	protein_coding	2	LIM homeobox protein 2	LHX2	25.0926	0.25827	0.0133312	0.0278644	0.537928	0.590626	0.999631
ENSMUSG00000000253	Gmpr	protein_coding	13	guanosine monophosphate reductase	GMPR	2413.14	-0.0387183	-0.0317223	0.0467816	-0.663815	0.506809	0.999631
ENSMUSG00000000263	Glra1	protein_coding	11	glycine receptor, alpha 1 subunit	GLRA1	13928.3	-0.114815	-0.0884456	0.0472097	-1.93901	0.0525006	0.999631
ENSMUSG00000000266	Mid2	protein_coding	X	midline 2	MID2	2797	0.117893	0.0912367	0.0489402	1.86969	0.0615272	0.999631
ENSMUSG00000000275	Trim25	protein_coding	11	tripartite motif-containing 25	TRIM25	604.254	-0.0585327	-0.0310772	0.0585105	-0.552879	0.580346	0.999631
ENSMUSG00000000276	Dgke	protein_coding	11	diacylglycerol kinase, epsilon	DGKE	5176.17	-0.0334675	-0.0277036	0.0453892	-0.602471	0.546861	0.999631
ENSMUSG00000000278	Scpep1	protein_coding	11	serine carboxypeptidase 1	SCPEP1	1388.72	0.0175263	0.0111686	0.0587013	0.160039	0.87285	0.999631
ENSMUSG00000000282	Mnt	protein_coding	11	max binding protein	MNT	2299.51	-0.0138489	-0.0102127	0.0512648	-0.200986	0.84071	0.999631
ENSMUSG00000000290	Itgb2	protein_coding	10	integrin beta 2	ITGB2	1236.49	0.0251051	0.0171072	0.0588019	0.223194	0.823384	0.999631
ENSMUSG00000000295	Hddc2	protein_coding	10	HD domain containing 2	HDDC2	598.171	0.00256152	-0.00257834	0.058243	0.0250749	0.979995	0.999631
ENSMUSG00000000301	Pemt	protein_coding	11	phosphatidylethanolamine N-methyltransferase	PEMT	110.165	0.0462802	0.00758712	0.0509011	0.223303	0.8233	0.999631
ENSMUSG00000000303	Cdh1	protein_coding	8	cadherin 1	CDH1	24.8181	0.279258	0.0124987	0.0259612	0.53919	0.589755	0.999631
ENSMUSG00000000305	Cdh4	protein_coding	2	cadherin 4	CDH4	970.118	0.0424053	0.0241134	0.0585121	0.40058	0.688729	0.999631
ENSMUSG00000000308	Ckmt1	protein_coding	2	creatine kinase, mitochondrial 1, ubiquitous	CKMT1A,CKMT1B	15996.8	-0.0127216	-0.0104265	0.0393196	-0.281859	0.778052	0.999631
ENSMUSG00000000317	Bcl6b	protein_coding	11	B cell CLL/lymphoma 6, member B	BCL6B	48.8256	0.161052	0.0252615	0.0400829	0.527681	0.597721	0.999631
ENSMUSG00000000320	Alox12	protein_coding	11	arachidonate 12-lipoxygenase	ALOX12	28.8256	-0.195686	-0.00544929	0.0270145	-0.395556	0.692432	0.999631
ENSMUSG00000000325	Arvcf	protein_coding	16	armadillo repeat gene deleted in velocardiofacial syndrome	ARVCF	2121.64	-0.0378523	-0.0278181	0.0497103	-0.583392	0.559629	0.999631
ENSMUSG00000000326	Comt	protein_coding	16	catechol-O-methyltransferase	COMT	2678.78	0.0304654	0.0230047	0.0497859	0.468194	0.639646	0.999631
ENSMUSG00000000339	Rtca	protein_coding	3	RNA 3'-terminal phosphate cyclase	RTCA	1740.38	-0.0324653	-0.0278978	0.050112	-0.492785	0.622164	0.999631
ENSMUSG00000000340	Dbt	protein_coding	3	dihydrolipoamide branched chain transacylase E2	DBT	1130.74	-0.0505872	-0.0370039	0.0542497	-0.645328	0.518715	0.999631
ENSMUSG00000000346	Dazap2	protein_coding	15	DAZ associated protein 2	DAZAP2	6808.08	-0.0651091	-0.0567214	0.0428469	-1.27906	0.200874	0.999631
ENSMUSG00000000355	Mcts1	protein_coding	X	malignant T cell amplified sequence 1	MCTS1	1352.96	-0.00726074	-0.00781238	0.0519494	-0.102483	0.918373	0.999631
ENSMUSG00000000359	Rem1	protein_coding	2	rad and gem related GTP binding protein 1	REM1	10.6096	0.038867	0.00485794	0.0205567	0.0580054	0.953744	0.999631
ENSMUSG00000000365	Rnf17	protein_coding	14	ring finger protein 17	RNF17	91.4922	0.302702	0.0300244	0.0362418	0.868769	0.384973	0.999631
ENSMUSG00000000374	Trappc10	protein_coding	10	trafficking protein particle complex 10	TRAPPC10	9924.86	-0.0303829	-0.0264092	0.0408316	-0.639291	0.522633	0.999631
ENSMUSG00000000378	Ccm2	protein_coding	11	cerebral cavernous malformation 2	CCM2	1619.51	-0.0082619	-0.00745296	0.0519811	-0.116469	0.907281	0.999631
ENSMUSG00000000384	Tbrg4	protein_coding	11	transforming growth factor beta regulated gene 4	TBRG4	1656.35	-0.0630397	-0.0488318	0.0502609	-0.951473	0.341364	0.999631
ENSMUSG00000000386	Mx1	polymorphic_pseudogene	16	MX dynamin-like GTPase 1	MX1,MX2	21.2611	-0.570027	-0.0393731	0.0286073	-1.23053	0.218499	0.999631
ENSMUSG00000000392	Fap	protein_coding	2	fibroblast activation protein	FAP	9.50656	-0.261939	-0.00708776	0.0194933	-0.371818	0.710028	0.999631
ENSMUSG00000000399	Ndufa9	protein_coding	6	NADH:ubiquinone oxidoreductase subunit A9	NDUFA9	5269.77	-0.0381405	-0.0332116	0.0427825	-0.7509	0.452713	0.999631
ENSMUSG00000000402	Egfl6	protein_coding	X	EGF-like-domain, multiple 6	EGFL6	252.509	-0.149775	-0.0563284	0.0575827	-1.02143	0.307049	0.999631
ENSMUSG00000000409	Lck	protein_coding	4	lymphocyte protein tyrosine kinase	LCK	54.7069	-0.162387	-0.0232797	0.0401266	-0.534633	0.592904	0.999631
ENSMUSG00000000416	Cttnbp2	protein_coding	6	cortactin binding protein 2	CTTNBP2	3349.82	0.0570846	0.0504023	0.0452191	1.03354	0.30135	0.999631
ENSMUSG00000000420	Galnt1	protein_coding	18	polypeptide N-acetylgalactosaminyltransferase 1	GALNT1	4275.09	-0.075195	-0.0610132	0.0477574	-1.24526	0.213035	0.999631
ENSMUSG00000000439	Mkrn2	protein_coding	6	makorin, ring finger protein, 2	MKRN2	2069.08	-0.0576318	-0.0463264	0.0475016	-0.963127	0.335484	0.999631
ENSMUSG00000000440	Pparg	protein_coding	6	peroxisome proliferator activated receptor gamma	PPARG	129.775	-0.090756	-0.0178127	0.0529467	-0.476833	0.633481	0.999631
ENSMUSG00000000441	Raf1	protein_coding	6	v-raf-leukemia viral oncogene 1	RAF1	4481.76	0.0120765	0.00980453	0.0410737	0.251999	0.801041	0.999631
ENSMUSG00000000486	Septin1	protein_coding	7	septin 1	SEPTIN1	160.213	0.0480794	0.0123405	0.0521105	0.243687	0.807473	0.999631
ENSMUSG00000000489	Pdgfb	protein_coding	15	platelet derived growth factor, B polypeptide	PDGFB	603.02	-0.087706	-0.0474957	0.0586454	-0.809532	0.418209	0.999631
ENSMUSG00000000530	Acvrl1	protein_coding	15	activin A receptor, type II-like 1	ACVRL1	462.202	0.133193	0.0579017	0.0584597	0.995739	0.319377	0.999631
ENSMUSG00000000531	Grasp	protein_coding	15	GRP1 (general receptor for phosphoinositides 1)-associated scaffold protein		262.104	-0.000182882	-0.0036562	0.0583795	-0.00135337	0.99892	0.999631
ENSMUSG00000000532	Acvr1b	protein_coding	15	activin A receptor, type 1B	ACVR1B	4064.16	-0.037354	-0.028809	0.0491945	-0.586974	0.557221	0.999631
ENSMUSG00000000538	Tom1l2	protein_coding	11	target of myb1-like 2 (chicken)	TOM1L2	19775.4	-0.0408736	-0.0359969	0.0398561	-0.889138	0.373929	0.999631
ENSMUSG00000000552	Zfp385a	protein_coding	15	zinc finger protein 385A	ZNF385A	4102.18	-0.0191976	-0.0159411	0.0451882	-0.347996	0.727843	0.999631
ENSMUSG00000000555	Itga5	protein_coding	15	integrin alpha 5 (fibronectin receptor alpha)	ITGA5	282.26	0.0049368	0.00678106	0.0564271	0.0309655	0.975297	0.999631
ENSMUSG00000000560	Gabra2	protein_coding	5	gamma-aminobutyric acid (GABA) A receptor, subunit alpha 2	GABRA2	6326.97	-0.0349652	-0.00301796	0.0565574	-0.221109	0.825007	0.999631
ENSMUSG00000000561	Wdr77	protein_coding	3	WD repeat domain 77	WDR77	1664.3	-0.0636725	-0.0503709	0.0496714	-0.982793	0.325709	0.999631
ENSMUSG00000000562	Adora3	protein_coding	3	adenosine A3 receptor	ADORA3	61.1037	0.0670709	0.00522783	0.0403519	0.222192	0.824165	0.999631
ENSMUSG00000000563	Atp5pb	protein_coding	3	ATP synthase peripheral stalk-membrane subunit b	ATP5PB	9704.14	-0.0418124	-0.0373143	0.0423941	-0.834185	0.404177	0.999631
ENSMUSG00000000567	Sox9	protein_coding	11	SRY (sex determining region Y)-box 9	SOX9	3701.51	-0.0705097	-0.0540241	0.0501731	-1.0679	0.285566	0.999631
ENSMUSG00000000568	Hnrnpd	protein_coding	5	heterogeneous nuclear ribonucleoprotein D	HNRNPD	7255.83	-0.00372468	-0.00413607	0.0405134	-0.0792245	0.936854	0.999631
ENSMUSG00000000579	Dynlt1c	protein_coding	17	dynein light chain Tctex-type 1C	DYNLT1	75.3048	0.324403	0.0513005	0.0454712	1.27675	0.201691	0.999631
ENSMUSG00000000581	C1d	protein_coding	11	C1D nuclear receptor co-repressor	C1D	1448.12	-0.0542313	-0.0415178	0.0557447	-0.640666	0.52174	0.999631
ENSMUSG00000000594	Gm2a	protein_coding	11	GM2 ganglioside activator protein	GM2A	5847.55	-0.103562	-0.08721	0.0433561	-1.99942	0.0455631	0.999631
ENSMUSG00000000600	Krit1	protein_coding	5	KRIT1, ankyrin repeat containing	KRIT1	3114.18	0.101625	0.0809968	0.0494588	1.58101	0.113876	0.999631
ENSMUSG00000000605	Clcn4	protein_coding	7	chloride channel, voltage-sensitive 4	CLCN4	10224.6	-0.0246827	-0.0226158	0.0378431	-0.57535	0.565055	0.999631
ENSMUSG00000000627	Sema4f	protein_coding	6	sema domain, immunoglobulin domain (Ig), TM domain, and short cytoplasmic domain	SEMA4F	1822.57	0.00992248	0.008296	0.0510606	0.145161	0.884584	0.999631
ENSMUSG00000000628	Hk2	protein_coding	6	hexokinase 2	HK2	689.75	0.0164673	0.0160961	0.0588741	0.137376	0.890733	0.999631
ENSMUSG00000000631	Myo18a	protein_coding	11	myosin XVIIIA	MYO18A	13107.8	0.0172443	0.0156924	0.0378271	0.402184	0.687549	0.999631
ENSMUSG00000000632	Sez6	protein_coding	11	seizure related gene 6	SEZ6	3806.41	-0.0778797	-0.0606679	0.0491798	-1.22448	0.22077	0.999631
ENSMUSG00000000673	Haao	protein_coding	17	3-hydroxyanthranilate 3,4-dioxygenase	HAAO	36.2003	-0.451245	-0.022819	0.0316193	-1.09455	0.273715	0.999631
ENSMUSG00000000682	Cd52	protein_coding	4	CD52 antigen	CD52	312.99	-0.0350815	-0.00364016	0.0541221	-0.194392	0.845869	0.999631
ENSMUSG00000000686	Abhd15	protein_coding	11	abhydrolase domain containing 15	ABHD15	167.568	0.100164	0.0287103	0.0553749	0.590759	0.554682	0.999631
ENSMUSG00000000690	Hoxb6	protein_coding	11	homeobox B6	HOXB6	1758.73	-0.0518771	-0.0375234	0.0511221	-0.757141	0.448965	0.999631
ENSMUSG00000000693	Loxl3	protein_coding	6	lysyl oxidase-like 3	LOXL3	269.351	-0.00654693	-0.00868355	0.0583316	-0.0481389	0.961606	0.999631
ENSMUSG00000000706	Btn1a1	protein_coding	13	butyrophilin, subfamily 1, member A1	BTN1A1	17.5126	-0.322658	-0.0141006	0.0246768	-0.59053	0.554835	0.999631
ENSMUSG00000000708	Kat2b	protein_coding	17	K(lysine) acetyltransferase 2B	KAT2B	4476.81	-0.0102446	-0.0127147	0.0515969	-0.146718	0.883355	0.999631
[truncated: 21,161 more rows]

## Sheet: Hallmark
contrast	pathway	pval	padj	ES	NES	nMoreExtreme	size	leadingEdge	leadingN	enriched
[truncated: 29 more rows]

[truncated: 2 more sheets: KEGG, REACTOME]
